# Supplementary material for: Light-induced metal-free transformations of unactivated pyridotriazoles
Source: Royal Society of Chemistry journal article supplement (doi:10.1039/c9sc02448d), 2019-01-01
Supplement: c9sc02448d1.pdf [file c9sc02448d1.pdf]

# Light-Induced Metal-Free Transformations of Unactivated Pyridotriazoles

Ziyan Zhang<sup>†</sup>, Dongari Yadagiri<sup>†</sup> and Vladimir Gevorgyan\*

Department of Chemistry, University of Illinois at Chicago, 845 West Taylor Street, Chicago, Illinois 60607-7061, United States

Department of Chemistry and Biochemistry, University of Texas at Dallas, 800 W Campbell RD, Richardson, Texas 75080, United States, Email: vlad@utdallas.edu

## Table of Contents

|                                                                       |      |
|-----------------------------------------------------------------------|------|
| 1. General Information                                                | S1   |
| 2. UV-vis Absorption Spectra of Pyridotriazoles                       | S3   |
| 3. Preparation of Pyridotriazoles                                     | S8   |
| 4. Reaction Optimization                                              | S10  |
| 5. General Procedures for Arylation, X-H insertions, Cyclopropanation | S12  |
| 6. Synthesis of Biologically Active Molecules                         | S50  |
| 7. Determination of Stereochemistry of Cyclopropanes                  | S53  |
| 8. NMR Spectral Data                                                  | S65  |
| 9. References                                                         | S150 |

## 1. General Information

NMR spectra were recorded on Bruker Avance DRX-500 (500 MHz) or DPX-400 (400 MHz) instrument.  $^1\text{H}$  signals are referenced to residual  $\text{CHCl}_3$  at 7.26 ppm.  $^{13}\text{C}$  signals are referenced to  $\text{CDCl}_3$  at 77.16 ppm. GC/MS analysis was performed on a Hewlett Packard Model 6890 GC interfaced to a Hewlett Packard Model 5973 mass selective detector (15 m x 0.25 mm capillary column, HP-5MS). Column chromatography was carried out employing Silicycle Silica-P flash silica gel (40-63  $\mu\text{m}$ ). Precoated silica gel plates F-254 were used for thin-layer analytical chromatography. LRMS and HRMS analyses were performed on Micromass 70 VSE mass spectrometer. Anhydrous solvents purchased from Aldrich were additionally purified on PureSolv PS-400-4 by Innovative Technology, Inc. purification system and/or stored over calcium hydride. All starting materials were purchased from Strem Chemicals, Aldrich, Gelest Inc., TCI America, Oakwood Chemical, AK Sci. or Alfa Aesar, or synthesized via known literature procedures. The 34 W Blue LED lamp (Kessil KSH150B LED Grow Light, 450nm), 23W Philips Household CFL, and Vornado 133 Small Air Circulator fan were purchased from amazon.com. 40 W Kessil LED PR160-390nm was purchased from kessil.com. All manipulations with transition metal catalysts were conducted in oven-dried glassware under inert atmosphere using a combination of glovebox and standard Schlenk techniques.

## 2. UV-vis absorption spectra of pyridotriazoles

Absorption spectra of various pyridotriazoles are employed in this study.

Concentration: 0.1 M in PhMe

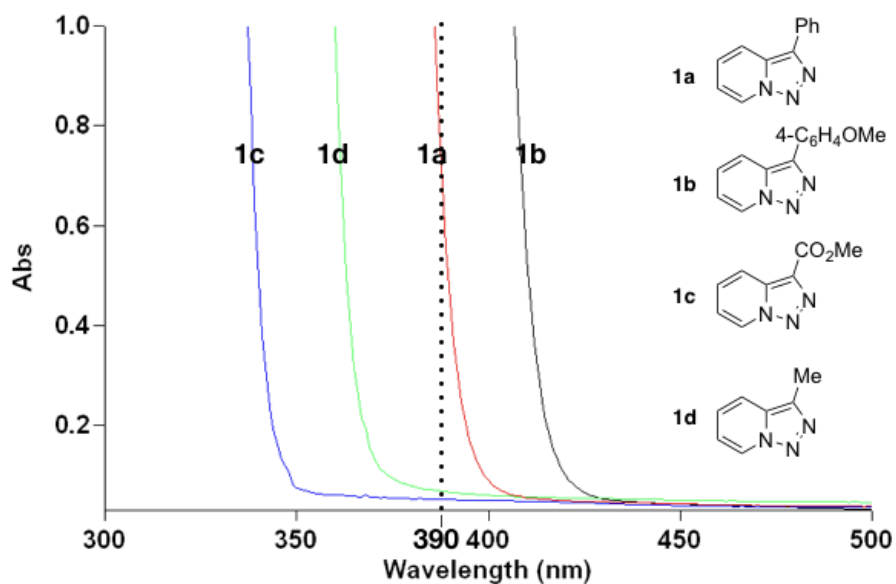

UV-vis absorption spectra of pyridotriazole **1e**

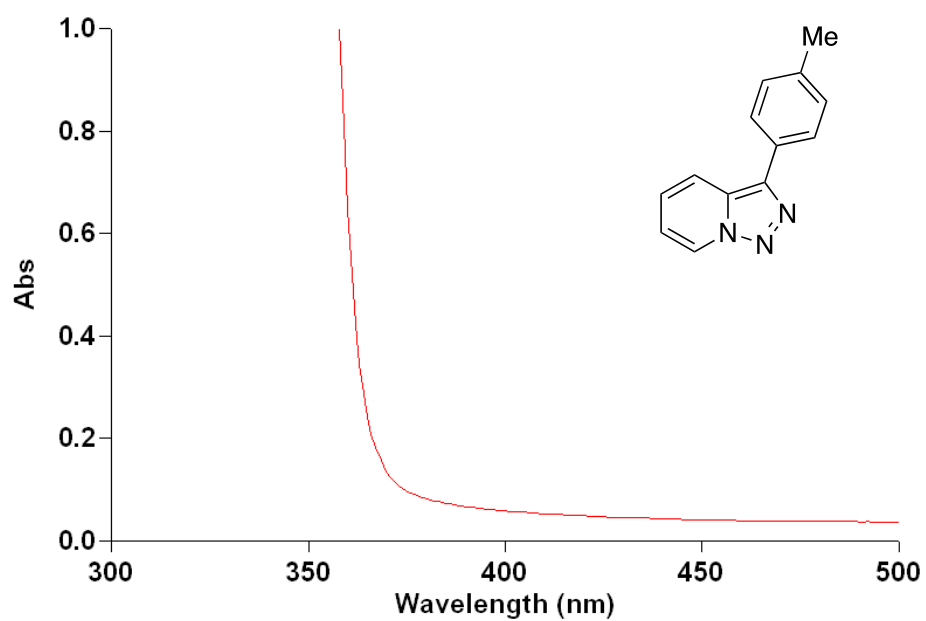

UV-vis absorption spectra of pyridotriazole **1f**

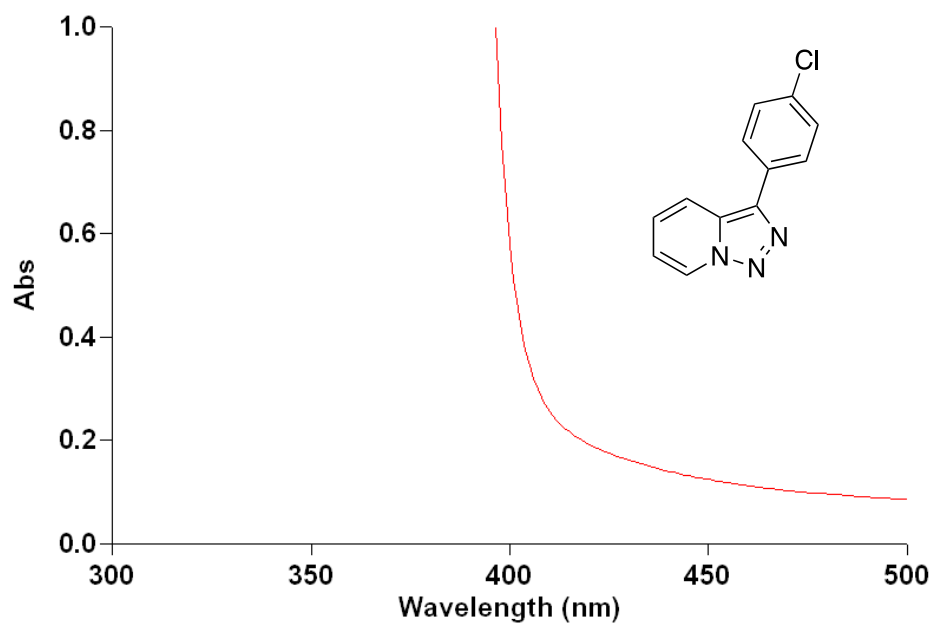

UV-vis absorption spectra of pyridotriazole **1g**

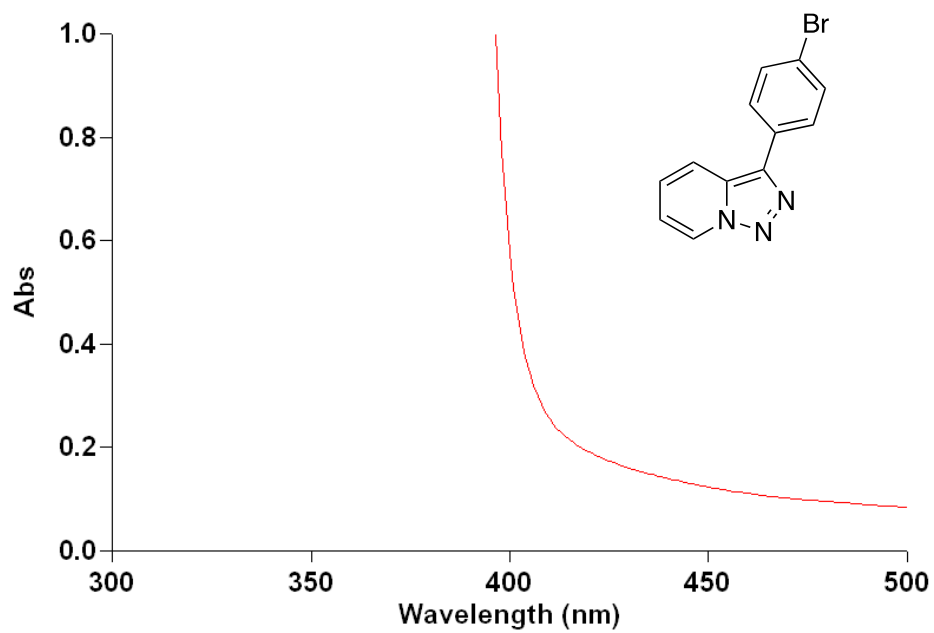

UV-vis absorption spectra of pyridotriazole **1h**

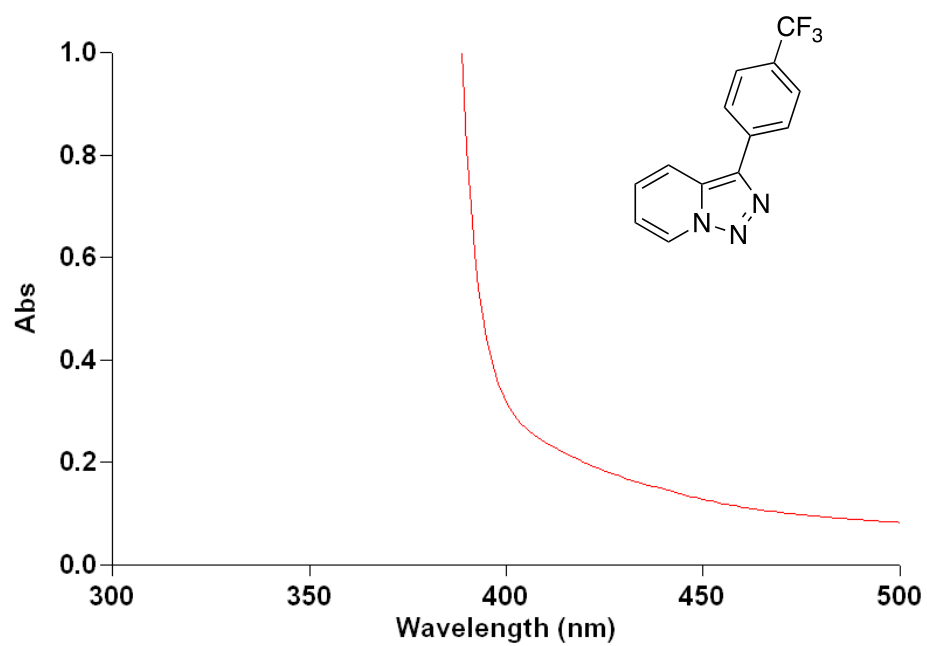

UV-vis absorption spectra of pyridotriazole **1i**

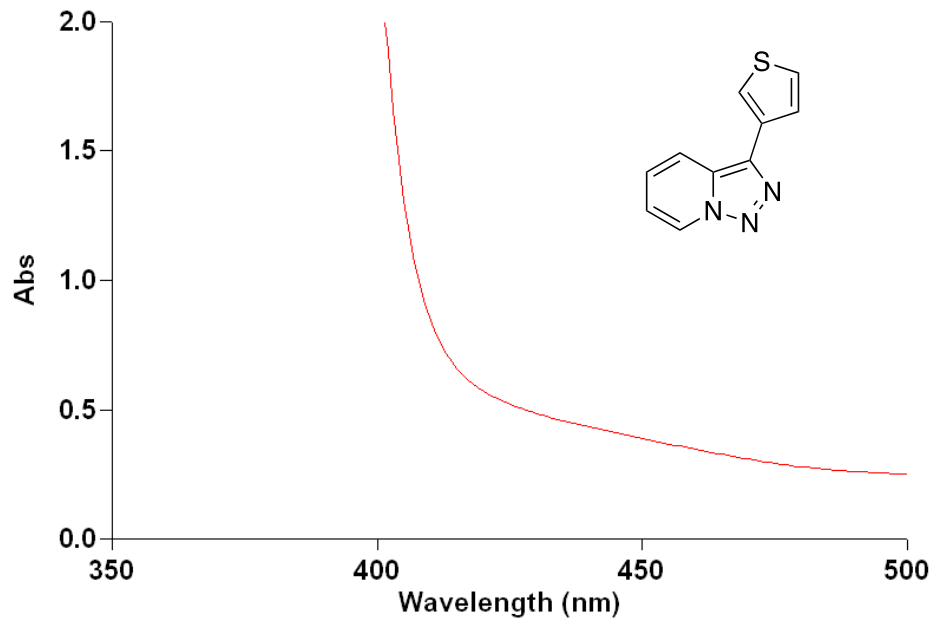

UV-vis absorption spectra of pyridotriazole **1j**

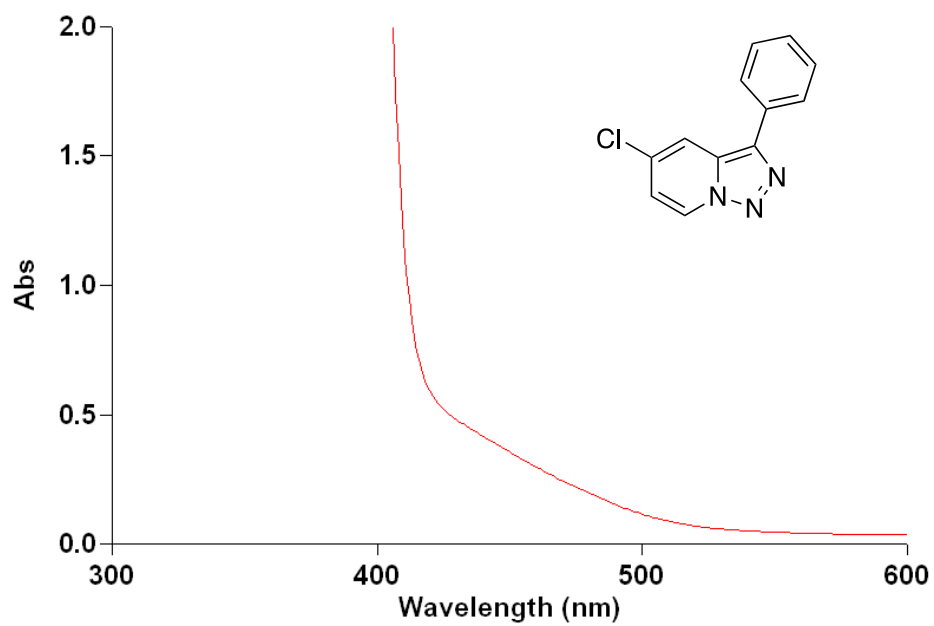

UV-vis absorption spectra of pyridotriazole **1k**

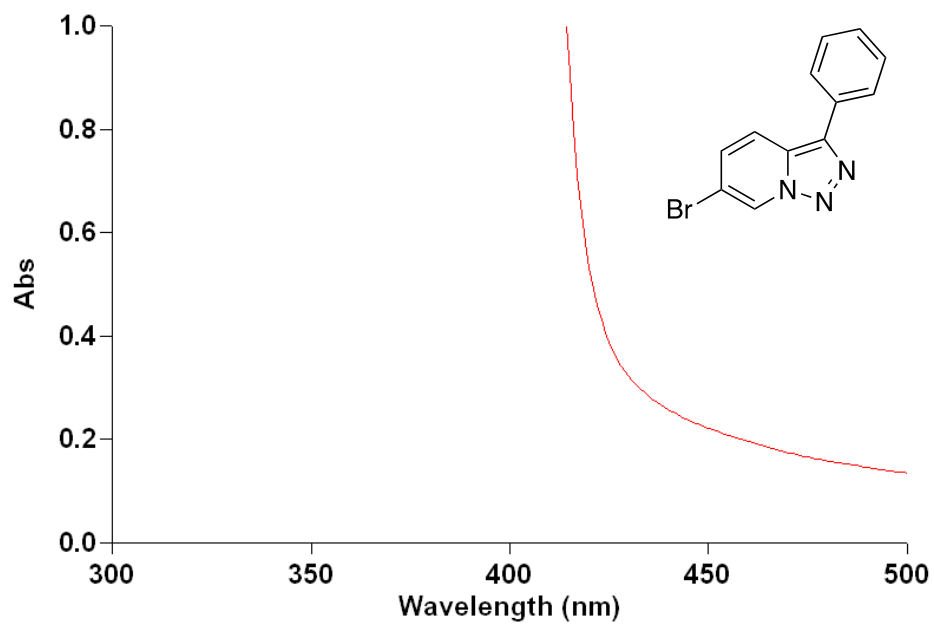

UV-vis absorption spectra of pyridotriazole **11**

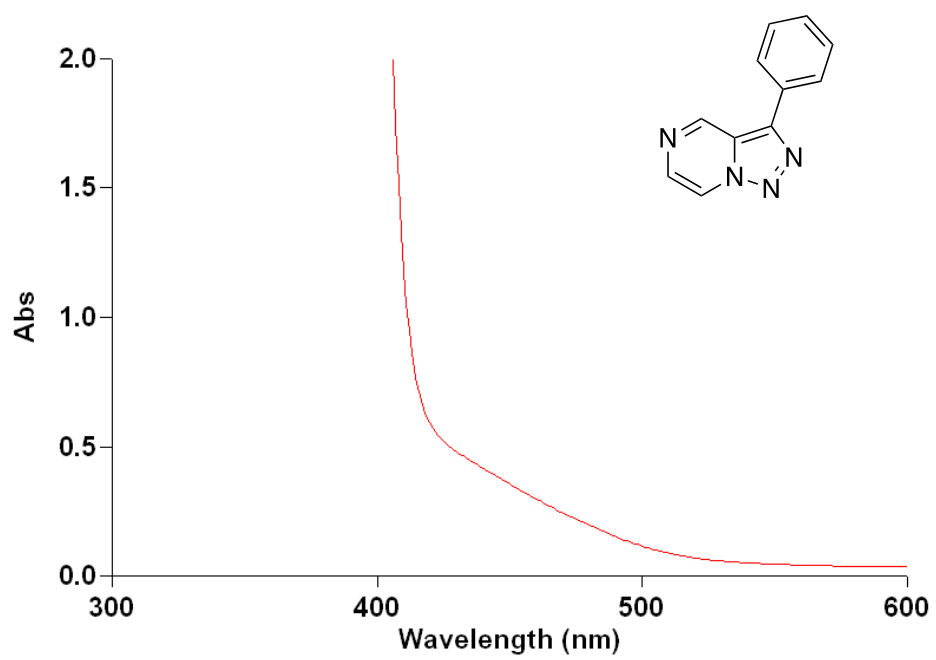

### 3. Preparation of Pyridotriazoles

**General Procedure:** Pyridotriazoles<sup>1,2</sup> (**1a-1l**) were prepared from 2-pyridylketone.

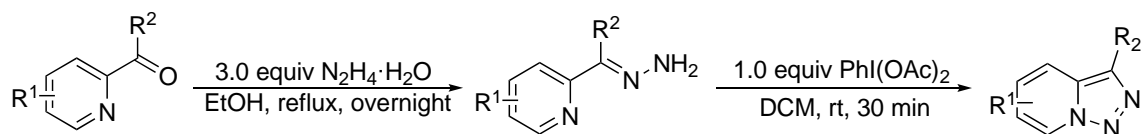

To a solution of 2-pyridylketone in ethanol (1 mL/mmol), hydrazine monohydrate (3 equiv) was added. The reaction mixture was refluxed overnight, quenched with water, and extracted with EtOAc twice. The extract was washed with water and brine and dried over sodium sulfate. Removal of solvent afforded the crude hydrazone, which was dissolved in dichloromethane (1 mL/mmol), and  $PhI(OAc)_2$  (1 equiv) was added to this solution in small portions. A rapid reaction occurred and the reaction mixture was stirred for 30 min at room temperature. The solvent was removed, and the residue was purified via flash Silica chromatography to afford corresponding pyridotriazoles as crystalline solid.

Pyridotriazoles **1a-1i** and **1k** were prepared according to general procedure. Spectral data are in accordance with the reported data.<sup>3</sup>

5-Chloro-3-phenyl-[1,2,3]triazolo[1,5-a]pyridine **1j**

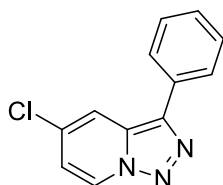

**1j** was prepared according to the general procedure. Yellow solid.  $R_f$  (hexanes/EtOAc = 2/1): 0.3.  $^1H$  NMR (500 MHz,  $CDCl_3$ )  $\delta$  ppm 8.67 (dd,  $J = 7.4, 0.9$  Hz, 1H), 7.97 (d,  $J = 0.8$  Hz, 1H), 7.91 (d,  $J = 7.4$  Hz, 2H), 7.52 (t,  $J = 7.6$  Hz, 2H), 7.40 (dd,  $J = 10.8, 4.0$  Hz, 1H), 6.96 (dd,  $J = 7.4, 1.0$  Hz, 1H).  $^{13}C$  NMR (126 MHz,  $CDCl_3$ )  $\delta$  ppm 138.2, 132.5, 131.2, 130.9, 129.5, 128.6, 127.0, 126.5, 117.5, 117.3. HRMS (EI<sup>+</sup>) calcd. for  $C_{12}H_7N_3Cl$   $[M+H]^+$ : 230.0485, found: 230.0482.

5-Chloro-3-phenyl-[1,2,3]triazolo[1,5-a]pyridine **11**

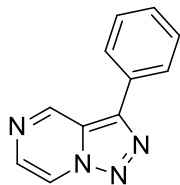

**11** was prepared according to the general procedure. Orange solid.  $R_f$  (hexanes/EtOAc = 2/1): 0.2.  $^1\text{H}$  NMR (500 MHz,  $\text{CDCl}_3$ )  $\delta$  ppm 9.54 (s, 1H), 8.65 (dd,  $J$  = 4.8, 1.4 Hz, 1H), 8.08 – 7.98 (m, 3H), 7.57 (t,  $J$  = 6.9 Hz, 2H), 7.48 (dd,  $J$  = 11.1, 3.7 Hz, 1H).  $^{13}\text{C}$  NMR (126 MHz,  $\text{CDCl}_3$ )  $\delta$  ppm 145.8, 140.5, 131.7, 129.8, 129.2, 129.1, 127.0, 118.3. HRMS (EI+) calcd. for  $\text{C}_{11}\text{H}_8\text{N}_4$   $[\text{M}+\text{H}]^+$ : 197.0827, found: 197.0823.

#### 4. Reaction Optimization

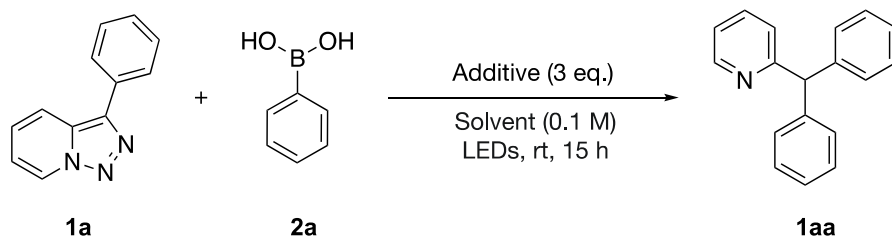

An oven dried 3 mL Wheaton V-vial containing a stirring bar was charged with pyridotriazoles **1a** (0.05 mmol, 1 equiv), additive (0.15 mmol, 3 equiv), phenylboronic acid **2a** (0.075 mmol, 1.5 equiv) and internal standard pentadecane (5  $\mu$ L) in dry solvents (0.5 mL) under argon atmosphere (outside glovebox). After the reaction vessel was capped with a pressure screw cap in the glove box. The vial was irradiated with 40 W Kessil LED PR160-390nm for 12-24 h (monitored by GC/MS), with cooling from a fan (vial temperature reached 37  $^{\circ}$ C). The vial distance from the lamp was about 2-3 cm. The reaction mixture was measured by GC/MS use pentadecane as an internal standard.

**Table 1. Optimization studies of Arylation**

| Entry     | Additive                           | Solvent     | LEDs         | Yields (%) |
|-----------|------------------------------------|-------------|--------------|------------|
| <b>1</b>  | <b>K<sub>2</sub>CO<sub>3</sub></b> | <b>PhMe</b> | <b>390nm</b> | <b>84</b>  |
| <b>2</b>  | CS <sub>2</sub> CO <sub>3</sub>    | PhMe        | 390nm        | 73         |
| <b>3</b>  | Na <sub>2</sub> CO <sub>3</sub>    | PhMe        | 390nm        | 73         |
| <b>4</b>  | KOH                                | PhMe        | 390nm        | 8          |
| <b>5</b>  | NaOH                               | PhMe        | 390nm        | 65         |
| <b>6</b>  | NaOAc                              | PhMe        | 390nm        | 33         |
| <b>7</b>  | K <sub>3</sub> PO <sub>4</sub>     | PhMe        | 390nm        | 44         |
| <b>8</b>  | NaF                                | PhMe        | 390nm        | 56         |
| <b>9</b>  | CsF                                | PhMe        | 390nm        | 9          |
| <b>10</b> | Li <sub>2</sub> CO <sub>3</sub>    | PhMe        | 390nm        | 44         |
| <b>11</b> | NaHCO <sub>3</sub>                 | PhMe        | 390nm        | 53         |
| <b>12</b> | NaOtBu                             | PhMe        | 390nm        | 0          |
| <b>13</b> | NEt <sub>3</sub>                   | PhMe        | 390nm        | 40         |

|           |                                    |                   |       |                  |
|-----------|------------------------------------|-------------------|-------|------------------|
| <b>14</b> | KOtBu                              | PhMe              | 390nm | 0                |
| <b>15</b> | <i>i</i> Pr <sub>2</sub> NH        | PhMe              | 390nm | 90               |
| <b>16</b> | -                                  | PhMe              | 390nm | 25               |
| <b>17</b> | <b>K<sub>2</sub>CO<sub>3</sub></b> | <b>PhH</b>        | 390nm | <b>89</b>        |
| <b>18</b> | K <sub>2</sub> CO <sub>3</sub>     | 1,4-dioxane       | 390nm | 68               |
| <b>19</b> | K <sub>2</sub> CO <sub>3</sub>     | THF               | 390nm | 0                |
| <b>20</b> | K <sub>2</sub> CO <sub>3</sub>     | MeCN              | 390nm | 0                |
| <b>21</b> | K <sub>2</sub> CO <sub>3</sub>     | CHCl <sub>3</sub> | 390nm | 24               |
| <b>22</b> | K <sub>2</sub> CO <sub>3</sub>     | DCE               | 390nm | 64               |
| <b>23</b> | K <sub>2</sub> CO <sub>3</sub>     | DMF               | 390nm | 0                |
| <b>24</b> | K <sub>2</sub> CO <sub>3</sub>     | PhCF <sub>3</sub> | 390nm | 60               |
| <b>25</b> | K <sub>2</sub> CO <sub>3</sub>     | PhH               | 427nm | 0                |
| <b>26</b> | K <sub>2</sub> CO <sub>3</sub>     | PhH               | 455nm | 0                |
| <b>27</b> | K <sub>2</sub> CO <sub>3</sub>     | PhH               | Dark  | 0                |
| <b>28</b> | K <sub>2</sub> CO <sub>3</sub>     | PhH               | -     | 0 <sup>[a]</sup> |

[a] Reaction temperatures are room temperature, 50°C, 100°C and 120°C.

## 5. General Procedures for Arylation, X-H insertions, Cyclopropanation of Pyridotriazoles

### General procedure A for arylation of pyridotriazoles

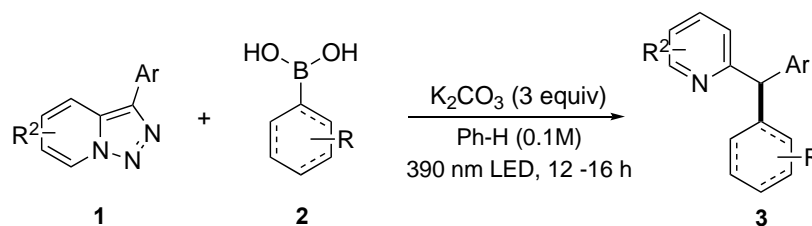

An oven dried 3 mL Wheaton V-vial containing a stirring bar was charged with Pyridotriazoles **1** (0.2 mmol, 1 equiv), K<sub>2</sub>CO<sub>3</sub> (83 mg, 0.6 mmol, 3 equiv) and aryl or alkenylboronic acid **2** (0.3 mmol, 1.5 equiv) in dry and degassed benzene (2 mL) under argon atmosphere (outside glovebox). After the reaction vessel was capped with a pressure screw cap in the glove box. The vial was irradiated with 40 W Kessil LED PR160-390nm for 12-24 h (monitored by GC/MS), with cooling from a fan (vial temperature reached 37 °C). The vial distance from the lamp was about 2-3 cm. The resulting mixture was passed through a pad of Celite, and concentrated under a reduced pressure. The residue was purified by column chromatography in hexanes/EtOAc to afford the corresponding triarylmethanes.

### General procedure B for X-H insertion of pyridotriazoles

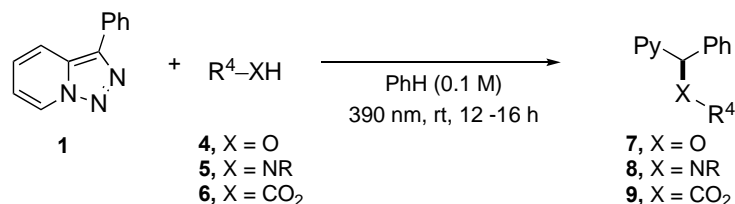

An oven dried 3 mL Wheaton V-vial containing a stirring bar was charged with Pyridotriazoles **1** (0.2 mmol, 1 equiv), in dry and degassed benzene (2 mL) under argon atmosphere (outside glovebox) and compounds **4** or **5** or **6** (0.8 mmol, 4 equiv) were added. After the reaction vessel was capped with a pressure screw cap in the glove box. The vial was irradiated with 40 W Kessil LED PR160-390nm for 12-16 h (monitored by GC/MS), with cooling from a fan (vial temperature reached 37 °C). The vial distance from the lamp was about 2-3 cm. The solvent was removed under a reduced pressure. The residue was purified by column chromatography in hexanes/EtOAc to afford the corresponding compounds.

### General procedure C for cyclopropanation of pyridotriazoles

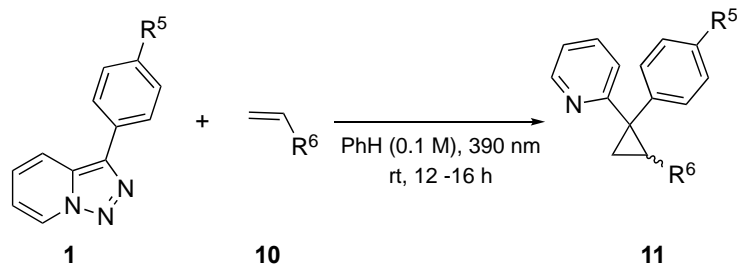

An oven dried 3 mL Wheaton V-vial containing a stirring bar was charged with Pyridotriazoles **1** (0.2 mmol, 1 equiv), in dry benzene (2 mL) under argon atmosphere (outside glovebox) and styrene **10** (0.6 mmol, 3 equiv) were added. After the reaction vessel was capped with a pressure screw cap in the glove box. The vial was irradiated with 40 W Kessil LED PR160-390nm for 12-16 h (monitored by GC/MS), with cooling from a fan (vial temperature reached 37 °C). The vial distance from the lamp was about 2-3 cm. The solvent was removed under a reduced pressure. The residue was purified by column chromatography in hexanes/EtOAc to afford the corresponding cyclopropanes **11**.

### Diphenyl-2-pyridylmethane **3aa**

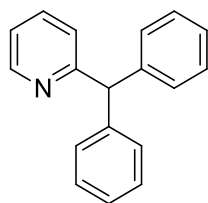

**3aa** was prepared according to the general procedure **A** in 89% yield (43.7 mg, 0.178 mmol) from 0.2 mmol of **1a**. White solid. *R*<sub>f</sub> (hexanes/EtOAc = 4/1): 0.3. <sup>1</sup>H NMR (500 MHz, CDCl<sub>3</sub>): δ ppm 8.61 (d, *J* = 4.6 Hz, 1H), 7.60 – 7.56 (m, 1H), 7.30 – 7.29 (m, 4H), 7.23 – 7.20 (m, 2H), 7.18 – 7.15 (m, 4H), 7.14 (d, 5.4 Hz, 1H), 7.09 – 7.04 (m, 1H), 5.71 (s, 1H). <sup>13</sup>C NMR (126 MHz, CDCl<sub>3</sub>): δ ppm 163.3, 149.6, 142.8, 136.5, 129.5, 128.5, 126.6, 123.9, 121.5, 59.5. HRMS (EI<sup>+</sup>) calcd. for C<sub>18</sub>H<sub>15</sub>N [M+H]<sup>+</sup>: 246.1283, found: 246.1280.

2-((4-((Tert-butyldimethylsilyl)oxy)phenyl)(phenyl)methyl)pyridine **3ab**

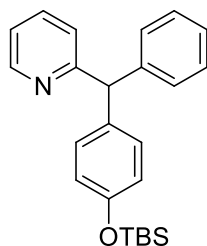

**3ab** was prepared according to the general procedure **A** in 85% yield (64.0 mg, 0.17 mmol) from 0.2 mmol of **1a**. Colorless liquid.  $R_f$  (hexanes/EtOAc = 3/1): 0.29.  $^1\text{H}$  NMR (500 MHz,  $\text{CDCl}_3$ ):  $\delta$  ppm 8.59 (d,  $J = 4.8$  Hz, 1H), 7.59 – 7.55 (m, 1H), 7.29 – 7.24 (m, 2H), 7.22 – 7.20 (m, 1H), 7.14 – 7.10 (m, 3H), 7.06 (d,  $J = 7.8$  Hz, 1H), 7.01 – 7.00 (m, 2H), 6.77 – 6.75 (m, 2H), 5.64 (s, 1H), 0.97 (s, 9H), 0.18 (s, 6H).  $^{13}\text{C}$  NMR (126 MHz,  $\text{CDCl}_3$ ):  $\delta$  ppm 163.7, 154.3, 149.6, 143.2, 136.5, 135.5, 130.4, 129.4, 128.5, 126.5, 123.8, 121.4, 120.0, 58.7, 25.8, 18.3, -4.2. HRMS (EI+) calcd. for  $\text{C}_{24}\text{H}_{29}\text{NOSi}$   $[\text{M}+\text{H}]^+$ : 376.2097, found: 376.2092.

2-((4-((Tert-butyldimethylsilyl)oxy)phenyl)(phenyl)methyl)pyridine **3ac**

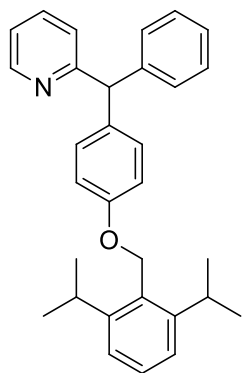

**3ac** was prepared according to the general procedure **A** in 87% yield (76.0 mg, 0.174 mmol) from 0.2 mmol of **1a**. Colorless liquid.  $R_f$  (hexanes/EtOAc = 3/1): 0.29.  $^1\text{H}$  NMR (500 MHz,  $\text{CDCl}_3$ ):  $\delta$  ppm 8.62 (d,  $J = 4.3$  Hz, 1H), 7.62 – 7.58 (m, 1H), 7.46 – 7.43 (m, 2H), 7.33 – 7.30 (m, 2H), 7.25 – 7.23 (m, 3H), 7.21 – 7.19 (m, 2H), 7.17 – 7.13 (m, 5H), 5.74 (s, 1H), 4.78 (s, 2H), 3.42 – 3.37 (m, 2H), 1.24 (d,  $J = 1.6$  Hz, 6H), 1.23 (d,  $J = 1.5$  Hz, 6H).  $^{13}\text{C}$  NMR (126 MHz,  $\text{CDCl}_3$ ):  $\delta$  ppm 163.28, 153.1, 149.7, 142.7, 142.6, 142.07, 136.6, 136.0, 129.7, 129.5, 128.6, 127.7, 126.7, 124.8,

124.2, 123.9, 121.6, 76.3, 59.3, 26.6, 24.2. HRMS (EI<sup>+</sup>) calcd. for C<sub>31</sub>H<sub>33</sub>NO [M+H]<sup>+</sup>: 436.2640, found: 436.2634.

2-((4-Methoxyphenyl)(phenyl)methyl)pyridine **3ad**

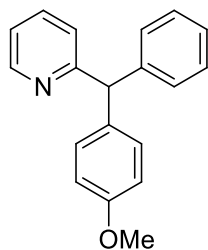

**3ad** was prepared according to the general procedure **A** in 45% yield (25.0 mg, 0.0908 mmol) from 0.2 mmol of **1a**. colorless liquid. R<sub>f</sub> (hexanes/EtOAc = 3/1): 0.29. <sup>1</sup>H NMR (500 MHz, CDCl<sub>3</sub>): δ ppm 8.60 (d, *J* = 4.8 Hz, 1H), 7.60 – 7.55 (m, 1H), 7.29 – 7.24 (m, 2H), 7.22 – 7.18 (m, 1H), 7.16 – 7.15 (m, 2H), 7.14 – 7.11 (m, 1H), 7.08 – 7.04 (m, 3H), 6.85 – 6.83 (m, 2H), 5.65 (s, 1H), 3.78 (s, 3H). <sup>13</sup>C NMR (126 MHz, CDCl<sub>3</sub>): δ ppm 163.6, 158.3, 149.6, 143.2, 136.5, 135.0, 130.4, 129.4, 128.5, 126.5, 123.8, 121.4, 113.9, 58.7, 55.3. HRMS (EI<sup>+</sup>) calcd. for C<sub>19</sub>H<sub>17</sub>NO [M+H]<sup>+</sup>: 276.1388, found: 276.1385.

2-((4-Fluorophenyl)(phenyl)methyl)pyridine **3ae**

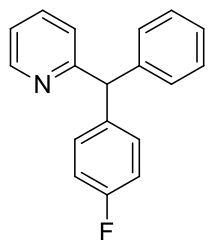

**3ae** was prepared according to the general procedure **A** in 84% yield (44.0 mg, 0.167 mmol) from 0.2 mmol of **1a**. Colorless liquid. R<sub>f</sub> (hexanes/EtOAc = 5/1): 0.30. <sup>1</sup>H NMR (500 MHz, CDCl<sub>3</sub>) δ 8.64 – 8.58 (m, 1H), 7.61 – 7.58 (m, 1H), 7.31 – 7.27 (m, 2H), 7.24 – 7.20 (m, 1H), 7.15 – 7.11 (m, 5H), 7.08 (d, *J* = 7.8 Hz, 1H), 6.99 – 6.95 (m, 2H), 5.69 (s, 1H). <sup>13</sup>C NMR (126 MHz, CDCl<sub>3</sub>) δ ppm 162.9, 162.5, 160.6, 149.6, 142.6, 138.5, 136.5, 130.8, 129.3, 128.5, 126.7, 123.7, 121.5, 115.3, 115.2, 58.5. HRMS (EI<sup>+</sup>) calcd. for C<sub>18</sub>H<sub>14</sub>NF [M+H]<sup>+</sup>: 264.1189, found: 264.1190.

2-((4-Chlorophenyl)(phenyl)methyl)pyridine **3af**

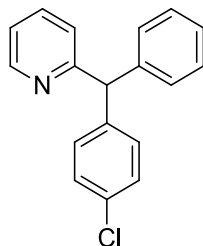

**3af** was prepared according to the general procedure **A** in 70% yield (39.0 mg, 0.139 mmol) from 0.2 mmol of **1a**. Light yellow liquid.  $R_f$  (hexanes/EtOAc = 5/1): 0.20.  $^1\text{H}$  NMR (400 MHz,  $\text{CDCl}_3$ )  $\delta$  ppm 8.61 (d,  $J = 3.7$  Hz, 1H), 7.61 – 7.58 (m, 1H), 7.29 – 7.26 (m, 5H), 7.19 – 7.01 (m, 6H), 5.67 (s, 1H).  $^{13}\text{C}$  NMR (126 MHz,  $\text{CDCl}_3$ )  $\delta$  ppm 162.9, 162.5, 160.5, 149.6, 142.6, 138.5, 136.5, 130.8, 130.8, 129.2, 128.5, 126.7, 123.7, 121.5, 115.3, 115.1, 58.5. HRMS (EI<sup>+</sup>) calcd. for  $\text{C}_{18}\text{H}_{14}\text{NCl}$   $[\text{M}+\text{H}]^+$ : 280.0893, found: 280.0887.

2-((4-Bromophenyl)(phenyl)methyl)pyridine **3ag**

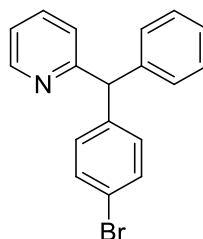

**3ag** was prepared according to the general procedure **A** in 50% yield (32.5 mg, 0.1 mmol) from 0.2 mmol of **1a**. Colorless liquid.  $R_f$  (hexanes/EtOAc = 3/1): 0.29.  $^1\text{H}$  NMR (400 MHz,  $\text{CDCl}_3$ ):  $\delta$  ppm 8.59 – 8.58 (m, 1H), 7.65 – 7.60 (m, 1H), 7.42 – 7.40 (m, 2H), 7.30 – 7.28 (m, 1H), 7.26 – 7.23 (m, 1H), 7.20 – 7.16 (m, 1H), 7.14 – 7.12 (m, 2H), 7.09 – 7.06 (m, 1H), 7.04 – 7.03 (m, 2H), 6.63 – 6.60 (m, 1H), 5.67 (s, 1H).  $^{13}\text{C}$  NMR (101 MHz,  $\text{CDCl}_3$ ):  $\delta$  ppm 163.3, 149.7, 137.2, 132.7, 131.9, 131.5, 129.6, 128.9, 127.2, 124.2, 122.2, 121.0, 117.7, 58.9. HRMS (EI<sup>+</sup>) calcd. for  $\text{C}_{18}\text{H}_{14}\text{NBr}$   $[\text{M}+\text{H}]^+$ : 324.0388, found: 324.0382.

1-(4-(Phenyl(pyridin-2-yl)methyl)phenyl)ethanone **3ah**

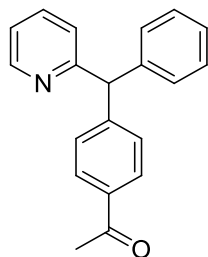

**3ah** was prepared according to the general procedure **A** in 75% yield (43.0 mg, 0.15 mmol) from 0.2 mmol of **1a**. Colorless liquid.  $R_f$  (hexanes/EtOAc = 3/1): 0.34.  $^1\text{H}$  NMR (400 MHz,  $\text{CDCl}_3$ ):  $\delta$  ppm 8.64 – 8.58 (m, 1H), 7.90 – 7.88 (m, 2H), 7.64 – 7.60 (m, 1H), 7.33 – 7.23 (m, 5H), 7.21 – 7.13 (m, 3H), 7.10 (d,  $J$  = 7.9 Hz, 1H), 5.75 (s, 1H), 2.57 (s, 3H).  $^{13}\text{C}$  NMR (101 MHz,  $\text{CDCl}_3$ ):  $\delta$  ppm 198.0, 162.4, 149.6, 148.3, 141.8, 136.9, 135.63, 130.9, 129.7, 129.4, 128.7, 127.0, 124.0, 121.9, 59.2, 26.7. HRMS (EI<sup>+</sup>) calcd. for  $\text{C}_{20}\text{H}_{17}\text{NO}$   $[\text{M}+\text{H}]^+$ : 288.1388, found: 288.1388.

Methyl 4-(phenyl(pyridin-2-yl)methyl)benzoate **3ai**

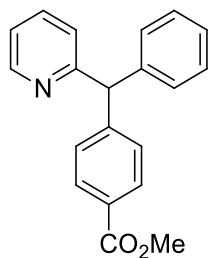

**3ai** was prepared according to the general procedure **A** in 60% yield (36.5 mg, 0.12 mmol) from 0.2 mmol of **1a**. Colorless liquid.  $R_f$  (hexanes/EtOAc = 3/1): 0.32.  $^1\text{H}$  NMR (400 MHz,  $\text{CDCl}_3$ ):  $\delta$  ppm 8.60 (d,  $J$  = 4.0 Hz, 1H), 7.98 – 7.96 (m, 2H), 7.66 – 7.50 (m, 1H), 7.31 – 7.28 (m, 2H), 7.26 – 7.23 (m, 3H), 7.17 – 7.15 (m, 3H), 7.08 (d,  $J$  = 7.8 Hz, 1H), 5.74 (s, 1H), 3.89 (s, 3H).  $^{13}\text{C}$  NMR (101 MHz,  $\text{CDCl}_3$ ):  $\delta$  ppm 167.1, 162.5, 149.7, 148.1, 142.0, 136.7, 129.8, 129.5, 129.4, 128.7, 128.6, 126.9, 123.9, 121.83, 59.3, 52.17. HRMS (EI<sup>+</sup>) calcd. for  $\text{C}_{20}\text{H}_{17}\text{NO}_2$   $[\text{M}+\text{H}]^+$ : 304.1338, found: 304.1337.

2-(Phenyl(3-(trifluoromethyl)phenyl)methyl)pyridine **3aj**

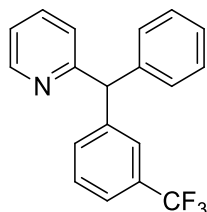

**3aj** was prepared according to the general procedure **A** in 72% yield (45.0 mg, 0.144 mmol) from 0.2 mmol of **1a**. Colorless liquid.  $R_f$  (hexanes/EtOAc = 5/1): 0.20.  $^1\text{H}$  NMR (500 MHz,  $\text{CDCl}_3$ )  $\delta$  ppm 8.62 (d,  $J$  = 2.8 Hz, 1H), 7.63 – 7.58 (m, 1H), 7.52 – 7.45 (m, 2H), 7.45 – 7.36 (m, 2H), 7.33 – 7.28 (m, 2H), 7.26 – 7.23 (m, 1H), 7.18 – 7.13 (m, 3H), 7.10 (d,  $J$  = 7.8 Hz, 1H), 5.75 (s, 1H).  $^{13}\text{C}$  NMR (126 MHz,  $\text{CDCl}_3$ )  $\delta$  ppm 160.0, 147.5, 141.6, 139.7, 134.6, 130.7, 127.1, 126.7, 126.5, 124.8, 123.9, 121.6, 121.4, 119.6, 56.8. HRMS (EI<sup>+</sup>) calcd. for  $\text{C}_{19}\text{H}_{14}\text{NF}_3$   $[\text{M}-\text{H}]^+$ : 312.1000, found: 312.0993.

2-((3-Chlorophenyl)(phenyl)methyl)pyridine **3ak**

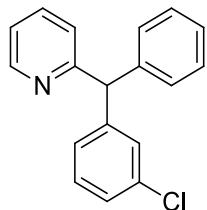

**3ak** was prepared according to the general procedure **A** in 68% yield (38.0 mg, 0.136 mmol) from 0.2 mmol of **1a**. Colorless liquid.  $R_f$  (hexanes/EtOAc = 5/1): 0.30.  $^1\text{H}$  NMR (400 MHz,  $\text{CDCl}_3$ )  $\delta$  ppm 8.61 (d,  $J$  = 3.9 Hz, 1H), 7.62 – 7.58 (m, 1H), 7.35 – 7.28 (m, 2H), 7.28 – 7.19 (m, 3H), 7.16 – 7.11 (m, 4H), 7.08 – 7.05 (m, 2H), 5.67 (s, 1H).  $^{13}\text{C}$  NMR (101 MHz,  $\text{CDCl}_3$ )  $\delta$  ppm 162.8, 150.10, 145.2, 142.4, 137.0, 134.7, 130.0, 129.9, 129.7, 129.0, 128.0, 127.2, 127.2, 124.1, 122.1, 59.4. HRMS (EI<sup>+</sup>) calcd. for  $\text{C}_{18}\text{H}_{14}\text{NCl}$   $[\text{M}+\text{H}]^+$ : 280.0893, found: 280.0884.

2-((3-Bromo-5-fluorophenyl)(phenyl)methyl)pyridine **3al**

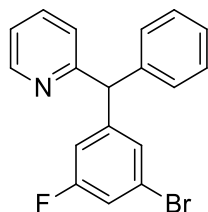

**3al** was prepared according to the general procedure **A** in 73% yield (50.0 mg, 0.146 mmol) from 0.2 mmol of **1a**. Colorless liquid.  $R_f$  (hexanes/EtOAc = 3/1): 0.29.  $^1\text{H}$  NMR (400 MHz,  $\text{CDCl}_3$ ):  $\delta$  ppm 8.61 (d,  $J = 3.9$  Hz, 1H), 7.64 – 7.60 (m, 1H), 7.35 – 7.31 (m, 2H), 7.28 – 7.24 (m, 1H), 7.20 – 7.15 (m, 3H), 7.12 – 7.08 (m, 3H), 6.83 (d,  $J = 9.7$  Hz, 1H), 5.62 (s, 1H).  $^{13}\text{C}$  NMR (101 MHz,  $\text{CDCl}_3$ ):  $\delta$  ppm 163.9, 161.8, 161.5, 149.8, 146.9, 141.3, 136.9, 129.3, 128.8, 128.4, 127.2, 123.8, 122.6, 122.0, 117.5, 115.64, 58.7. HRMS (EI+) calcd. for  $\text{C}_{18}\text{H}_{13}\text{NBrF}$   $[\text{M}+\text{H}]^+$ : 342.0294, found: 342.0289.

2-((3-Bromo-5-butoxyphenyl)(phenyl)methyl)pyridine **3am**

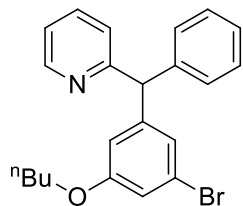

**3am** was prepared according to the general procedure **A** in 77% yield (61.0 mg, 0.154 mmol) from 0.2 mmol of **1a**. Colorless liquid.  $R_f$  (hexanes/EtOAc = 3/1): 0.29.  $^1\text{H}$  NMR (500 MHz,  $\text{CDCl}_3$ ):  $\delta$  ppm 8.60 (d,  $J = 4.0$  Hz, 1H), 7.64 – 7.60 (m, 1H), 7.32 – 7.29 (m, 2H), 7.25 – 7.22 (m, 1H), 7.17 – 7.14 (m, 3H), 7.08 (d,  $J = 7.9$  Hz, 1H), 6.91 – 6.88 (m, 2H), 6.65 (s, 1H), 5.60 (s, 1H), 3.86 (t,  $J = 6.5$  Hz, 2H), 1.71 – 1.68 (m, 2H), 1.43 (dd,  $J = 15.0, 7.5$  Hz, 2H), 0.94 (t,  $J = 7.4$  Hz, 3H).  $^{13}\text{C}$  NMR (126 MHz,  $\text{CDCl}_3$ ):  $\delta$  ppm 162.5, 160.0, 149.7, 145.9, 141.9, 136.7, 129.4, 128.7, 126.9, 124.7, 123.8, 122.9, 121.8, 115.7, 115.3, 68.04, 59.1, 31.2, 19.2, 13.9. HRMS (EI+) calcd. for  $\text{C}_{22}\text{H}_{22}\text{NOBr}$   $[\text{M}+\text{H}]^+$ : 396.0963, 396.0959.

### 2-(Phenyl(o-tolyl)methyl)pyridine **3an**

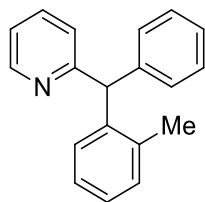

**3an** was prepared according to the general procedure **A** in 94% yield (49.0 mg, 0.189 mmol) from 0.2 mmol of **1a**. Colorless liquid.  $R_f$  (hexanes/EtOAc = 5/1): 0.30.  $^1\text{H}$  NMR (500 MHz,  $\text{CDCl}_3$ )  $\delta$  ppm 8.63 (d,  $J$  = 4.5 Hz, 1H), 7.60 – 7.56 (m, 1H), 7.31 – 7.26 (m, 2H), 7.25 – 7.23 (m, 1H), 7.21 – 7.07 (m, 6H), 6.99 – 6.95 (m, 1H), 6.85 (d,  $J$  = 7.4 Hz, 1H), 5.89 (s, 1H), 2.25 (s, 3H).  $^{13}\text{C}$  NMR (126 MHz,  $\text{CDCl}_3$ )  $\delta$  ppm 163.2, 149.7, 142.3, 141.3, 136.9, 136.5, 130.7, 129.7, 129.3, 128.6, 126.7, 126.6, 125.9, 123.9, 121.4, 56.4, 20.1. HRMS (EI+) calcd. for  $\text{C}_{19}\text{H}_{17}\text{N}$   $[\text{M}+\text{H}]^+$ : 260.1439, found: 260.1434.

### 2-(Naphthalen-1-yl(phenyl)methyl)pyridine **3ao**

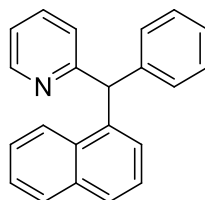

**3ao** was prepared according to the general procedure **A** in 63% yield (37.0 mg, 0.125 mmol) from 0.2 mmol of **1a**. colorless liquid.  $R_f$  (hexanes/EtOAc = 3/1): 0.29.  $^1\text{H}$  NMR (400 MHz,  $\text{CDCl}_3$ ):  $\delta$  ppm 8.64 – 8.63 (m, 1H), 7.99 (d,  $J$  = 8.4 Hz, 1H), 7.86 – 7.84 (m, 1H), 7.76 (d,  $J$  = 8.2 Hz, 1H), 7.58 – 7.56 (m, 1H), 7.46 – 7.41 (m, 2H), 7.39 – 7.37 (m, 2H), 7.32 – 7.26 (m, 2H), 7.16 – 7.13 (m, 3H), 6.99 (m, 2H), 6.47 (s, 1H).  $^{13}\text{C}$  NMR (101 MHz,  $\text{CDCl}_3$ ):  $\delta$  ppm 163.4, 149.8, 142.5, 139.0, 136.6, 134.1, 129.8, 128.8, 128.7, 127.7, 127.4, 126.7, 126.3, 125.6, 125.4, 124.4, 124.1, 121.6, 108.7, 56.0. HRMS (EI+) calcd. for  $\text{C}_{22}\text{H}_{17}\text{N}$   $[\text{M}+\text{H}]^+$ : 296.1439, found: 296.1436.

### 2-(Cyclohex-1-en-1-yl(phenyl)methyl)pyridine **3ap**

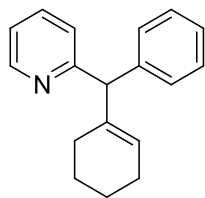

**3ap** was prepared according to the general procedure **A** in 70% yield (35.0 mg, 0.140 mmol) from 0.2 mmol of **1a**. Colorless liquid.  $R_f$  (hexanes/EtOAc = 4/1): 0.20.  $^1\text{H}$  NMR (500 MHz,  $\text{CDCl}_3$ )  $\delta$  ppm 8.61 (s, 1H), 7.61 – 7.58 (m, 1H), 7.33 (m, 2H), 7.29 – 7.21 (m, 3H), 7.11 – 7.09 (m, 2H), 5.20 (s, 1H), 4.85 (s, 1H), 2.07 (s, 2H), 1.99 (s, 2H), 1.68 – 1.59 (m, 4H).  $^{13}\text{C}$  NMR (126 MHz,  $\text{CDCl}_3$ )  $\delta$  ppm 162.5, 149.2, 141.4, 139.0, 135.9, 129.1, 128.1, 126.2, 125.4, 123.4, 121.0, 61.1, 28.8, 25.3, 22.9, 22.2. HRMS (EI<sup>+</sup>) calcd. for  $\text{C}_{18}\text{H}_{18}\text{N}$   $[\text{M}+\text{H}]^+$ : 250.1596, found: 250.1588.

### 2-(Phenyl(p-tolyl)methyl)pyridine **3ea**

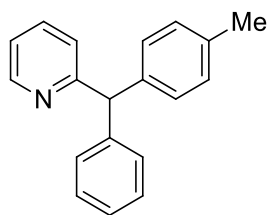

**3ea** was prepared according to the general procedure **A** in 83% yield (43.0 mg, 0.166 mmol) from 0.2 mmol of **1e**. Colorless liquid.  $R_f$  (hexanes/EtOAc = 4/1): 0.20.  $^1\text{H}$  NMR (500 MHz,  $\text{CDCl}_3$ )  $\delta$  ppm 8.62 (s, 1H), 7.61 – 7.59 (m, 1H), 7.31 – 7.29 (m, 2H), 7.28 – 7.16 (m, 3H), 7.10 (m, 6H), 5.69 (s, 1H), 2.34 (s, 3H).  $^{13}\text{C}$  NMR (126 MHz,  $\text{CDCl}_3$ )  $\delta$  ppm 163.4, 149.5, 142.9, 139.7, 136.4, 136.1, 129.3, 129.2, 129.1, 128.4, 126.4, 123.7, 121.3, 59.0, 21.0. HRMS (EI<sup>+</sup>) calcd. for  $\text{C}_{19}\text{H}_{17}\text{N}$   $[\text{M}+\text{H}]^+$ : 260.1439, found: 260.1432.

### 2-((4-Chlorophenyl)(phenyl)methyl)pyridine **3fa**

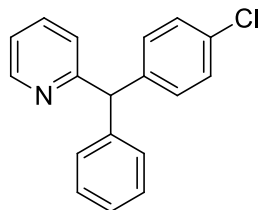

**3fa** was prepared according to the general procedure **A** in 72% yield (40.0 mg, 0.143 mmol) from 0.2 mmol of **1f**. Colorless liquid.  $R_f$  (hexanes/EtOAc = 4/1): 0.20.  $^1\text{H}$  NMR (500 MHz,  $\text{CDCl}_3$ )  $\delta$  ppm 8.61 (s, 1H), 7.61 – 7.58 (m, 1H), 7.28 – 7.23 (m, 5H), 7.20 – 7.03 (m, 6H), 5.67 (s, 1H).  $^{13}\text{C}$  NMR (126 MHz,  $\text{CDCl}_3$ )  $\delta$  ppm 163.0, 150.0, 142.6, 141.6, 136.9, 132.7, 131.0, 129.6, 128.9, 127.1, 124.1, 121.9, 59.1. HRMS (EI+) calcd. for  $\text{C}_{18}\text{H}_{14}\text{NCl}$   $[\text{M}+\text{H}]^+$ : 280.0893, found: 280.0886.

2-((4-Bromophenyl)(phenyl)methyl)pyridine **3ga**

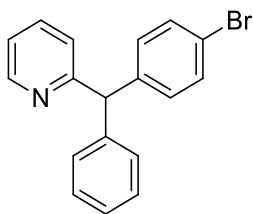

**3ga** was prepared according to the general procedure **A** in 90% yield (58.0 mg, 0.179 mmol) from 0.2 mmol of **1g**. Colorless liquid.  $R_f$  (hexanes/EtOAc = 4/1): 0.20.  $^1\text{H}$  NMR (500 MHz,  $\text{CDCl}_3$ )  $\delta$  ppm 8.61 (d,  $J$  = 3.8 Hz, 1H), 7.61 – 7.58 (m, 1H), 7.44 – 7.42 (m, 2H), 7.31 – 7.28 (m, 2H), 7.27 – 7.20 (m, 1H), 7.16 – 7.11 (m, 3H), 7.07 – 7.04 (m, 3H), 5.65 (s, 1H).  $^{13}\text{C}$  NMR (126 MHz,  $\text{CDCl}_3$ )  $\delta$  ppm 162.9, 150.0, 142.5, 142.2, 136.9, 131.8, 131.5, 129.7, 129.6, 128.9, 128.8, 127.1, 124.1, 121.9, 120.9, 59.1. HRMS (EI+) calcd. for  $\text{C}_{18}\text{H}_{14}\text{NBr}$   $[\text{M}+\text{H}]^+$ : 324.0388, found: 324.0382.

2-(Phenyl(4-(trifluoromethyl)phenyl)methyl)pyridine **3ha**

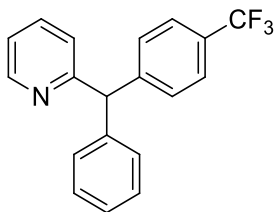

**3ha** was prepared according to the general procedure **A** in 56% yield (35.0 mg, 0.112 mmol) from 0.2 mmol of **1h**. Colorless liquid.  $R_f$  (hexanes/EtOAc = 4/1): 0.30.  $^1\text{H}$  NMR (500 MHz,  $\text{CDCl}_3$ )  $\delta$  ppm 8.62 (d,  $J$  = 4.1 Hz, 1H), 7.64 – 7.60 (m, 1H), 7.56 – 7.50 (m, 2H), 7.36 – 7.22 (m, 5H), 7.17 – 7.14 (m, 3H), 7.11 (d,  $J$  = 7.8 Hz, 1H), 5.74 (s, 1H).  $^{13}\text{C}$  NMR (126 MHz,  $\text{CDCl}_3$ )  $\delta$  ppm 162.4, 149.8, 147.0, 141.9, 136.8, 129.8, 129.4, 129.0, 128.7, 127.05, 125.5, 125.5, 123.9, 121.8, 59.2. HRMS (EI+) calcd. for  $\text{C}_{19}\text{H}_{14}\text{NF}_3$   $[\text{M}+\text{H}]^+$ : 314.1157, found: 314.1149.

### 2-(Phenyl(thiophen-3-yl)methyl)pyridine **3ia**

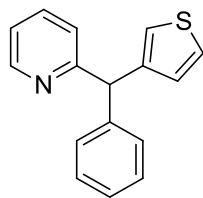

**3ia** was prepared according to the general procedure **A** in 30% yield (15.0 mg, 0.059 mmol) from 0.2 mmol of **1i**. Orange liquid.  $R_f$  (hexanes/EtOAc = 4/1): 0.30.  $^1\text{H}$  NMR (500 MHz,  $\text{CDCl}_3$ )  $\delta$  ppm 8.63 – 8.57 (m, 1H), 7.61 – 7.57 (m, 1H), 7.34 – 7.27 (m, 3H), 7.24 – 7.20 (m, 4H), 7.14 – 7.10 (m, 2H), 6.96 – 6.88 (m, 1H), 6.84 (s, 1H), 5.67 (s, 1H).  $^{13}\text{C}$  NMR (126 MHz,  $\text{CDCl}_3$ )  $\delta$  ppm 163.1, 149.7, 143.6, 142.8, 136.7, 129.5, 129.1, 128.7, 128.6, 126.8, 125.7, 123.4, 122.9, 121.7, 55.3. HRMS (EI<sup>+</sup>) calcd. for  $\text{C}_{16}\text{H}_{15}\text{NS}$   $[\text{M}+\text{H}]^+$ : 252.0847, found: 252.0840.

### 2-Benzhydryl-4-chloropyridine **3ja**

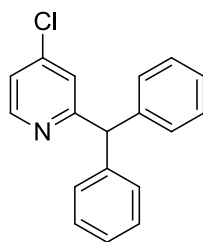

**3ja** was prepared according to the general procedure **A** in 90% yield (50.0 mg, 0.179 mmol) from 0.2 mmol of **1j**. Colorless liquid.  $R_f$  (hexanes/EtOAc = 4/1): 0.20.  $^1\text{H}$  NMR (500 MHz,  $\text{CDCl}_3$ )  $\delta$  ppm 8.51 (d,  $J$  = 5.3 Hz, 1H), 7.33 – 7.29 (m, 4H), 7.26 – 7.20 (m, 2H), 7.18 – 7.14 (m, 5H), 7.13 (d,  $J$  = 1.7 Hz, 1H), 5.70 (s, 1H).  $^{13}\text{C}$  NMR (126 MHz,  $\text{CDCl}_3$ )  $\delta$  ppm 165.3, 150.8, 144.9, 142.4, 129.7, 128.9, 127.2, 124.4, 122.2, 59.5. HRMS (EI<sup>+</sup>) calcd. for  $\text{C}_{18}\text{H}_{14}\text{NCl}$   $[\text{M}+\text{H}]^+$ : 280.0893, found: 280.0888.

### 2-Benzhydryl-4-chloropyridine **3ka**

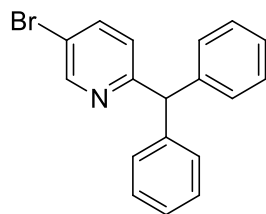

**3ka** was prepared according to the general procedure **A** in 77% yield (50.0 mg, 0.154 mmol) from 0.2 mmol of **1k**. Colorless liquid.  $R_f$  (hexanes/EtOAc = 4/1): 0.20.  $^1\text{H}$  NMR (500 MHz,  $\text{CDCl}_3$ )  $\delta$  ppm 8.67 (d,  $J = 2.2$  Hz, 1H), 7.73 – 7.68 (m, 1H), 7.33 – 7.29 (m, 4H), 7.28 – 7.20 (m, 2H), 7.17 – 7.13 (m, 4H), 7.01 (d,  $J = 8.3$  Hz, 1H), 5.67 (s, 1H).  $^{13}\text{C}$  NMR (126 MHz,  $\text{CDCl}_3$ )  $\delta$  ppm 161.9, 150.6, 142.3, 139.0, 129.3, 129.3, 128.6, 128.6, 128.6, 128.6, 126.8, 125.2, 118.6, 58.8. HRMS (EI+) calcd. for  $\text{C}_{18}\text{H}_{14}\text{NBr}$   $[\text{M}+\text{H}]^+$ : 324.0388, found: 324.0378.

### 2-Benzhydrylpyrazine **3la**

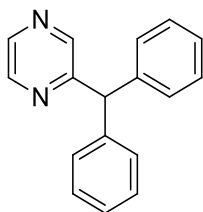

**3la** was prepared according to the general procedure **A** in 71% yield (35.0 mg, 0.142 mmol) from 0.2 mmol of **1l**. Colorless liquid.  $R_f$  (hexanes/EtOAc = 4/1): 0.30.  $^1\text{H}$  NMR (500 MHz,  $\text{CDCl}_3$ )  $\delta$  ppm 8.62 – 8.55 (m, 1H), 8.51 – 8.41 (m, 2H), 7.33 – 7.29 (m, 4H), 7.27 – 7.23 (m, 2H), 7.24 – 7.18 (m, 4H), 5.69 (s, 1H).  $^{13}\text{C}$  NMR (126 MHz,  $\text{CDCl}_3$ )  $\delta$  ppm 158.5, 145.2, 144.1, 142.3, 141.4, 129.1, 128.5, 126.8, 56.7. HRMS (EI+) calcd. for  $\text{C}_{17}\text{H}_{14}\text{N}_2$   $[\text{M}+\text{H}]^+$ : 247.1235, found: 247.1231.

### 2-((4-Fluorophenyl)(phenyl)methyl)pyrazine **3le**

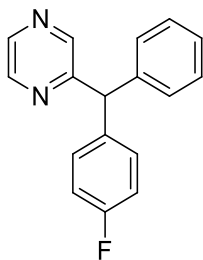

**3le** was prepared according to the general procedure **A** in 76% yield (41.0 mg, 0.155 mmol) from 0.2 mmol of **1l**. Colorless liquid.  $R_f$  (hexanes/EtOAc = 4/1): 0.20.  $^1\text{H}$  NMR (500 MHz,  $\text{CDCl}_3$ )  $\delta$  ppm 8.57 (d,  $J = 1.4$  Hz, 1H), 8.46 – 8.40 (m, 2H), 7.33 – 7.28 (m, 2H), 7.26 (d,  $J = 7.3$  Hz, 1H), 7.22 – 7.09 (m, 4H), 7.01 – 6.97 (m, 2H), 5.66 (s, 1H).  $^{13}\text{C}$  NMR (126 MHz,  $\text{CDCl}_3$ )  $\delta$  ppm 168.2, 166.2, 163.8, 150.7, 149.7, 148.1, 146.8, 142.7, 136.2, 136.2, 134.7, 134.5, 134.1, 134.1, 132.5, 132.4, 120.9, 120.8, 61.5. HRMS (EI+) calcd. for  $\text{C}_{17}\text{H}_{13}\text{N}_2\text{F}$   $[\text{M}+\text{H}]^+$ : 265.1141, found: 265.1136.

2-((4-Chlorophenyl)(phenyl)methyl)pyrazine **3le**

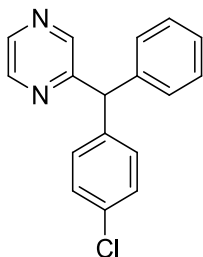

**3lf** was prepared according to the general procedure **A** in 75% yield (42.0 mg, 0.150 mmol) from 0.2 mmol of **1l**. Colorless liquid.  $R_f$  (hexanes/EtOAc = 4/1): 0.20.  $^1\text{H}$  NMR (500 MHz,  $\text{CDCl}_3$ )  $\delta$  ppm 8.57 (s, 1H), 8.46 – 8.40 (m, 2H), 7.37 – 7.22 (m, 6H), 7.22 – 7.07 (m, 4H), 5.63 (s, 1H).  $^{13}\text{C}$  NMR (126 MHz,  $\text{CDCl}_3$ )  $\delta$  ppm 158.4, 145.5, 144.5, 143.0, 141.3, 140.3, 133.1, 130.8, 129.5, 129.3, 129.0, 128.9, 128.6, 127.4, 56.4. HRMS (EI<sup>+</sup>) calcd. for  $\text{C}_{17}\text{H}_{13}\text{N}_2\text{Cl}$   $[\text{M}+\text{H}]^+$ : 281.0846, found: 281.0840.

2-(Phenoxy(phenyl)methyl)pyridine **7aa**

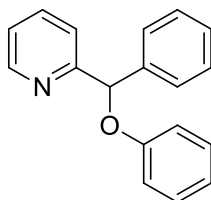

**7aa** was prepared according to the general procedure **B** in 50% yield (26.0 mg, 0.1 mmol) from 0.2 mmol of **1a**. Colorless liquid.  $R_f$  (hexanes/EtOAc = 4/1): 0.34.  $^1\text{H}$  NMR (500 MHz,  $\text{CDCl}_3$ ):  $\delta$  ppm 8.58 (d,  $J = 4.7$  Hz, 1H), 7.66 – 7.61 (m, 1H), 7.57 (d,  $J = 7.9$  Hz, 1H), 7.55 – 7.53 (m, 2H), 7.35 – 7.31 (m, 2H), 7.30 – 7.26 (m, 1H), 7.24 – 7.21 (m, 2H), 7.18 – 7.16 (m, 1H), 6.99 – 6.98 (m, 2H), 6.92 – 6.87 (m, 1H), 6.35 (s, 1H).  $^{13}\text{C}$  NMR (126 MHz,  $\text{CDCl}_3$ ):  $\delta$  ppm 160.9, 157.8, 149.3, 140.3, 137.2, 129.5, 128.7, 128.0, 126.9, 122.7, 121.2, 120.9, 116.0, 82.6. HRMS (EI<sup>+</sup>) calcd. for  $\text{C}_{18}\text{H}_{15}\text{NO}$   $[\text{M}+\text{H}]^+$ : 262.1232, found: 262.1227.

4-(Phenyl(pyridin-2-yl)methyl)phenol **7aa'**

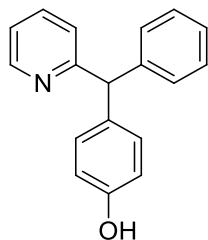

**7aa'** was prepared according to the general procedure **B** in 20% yield (10.5 mg, 0.04 mmol) from 0.2 mmol of **1a**. Colorless semi-solid.  $R_f$  (hexanes/EtOAc = 3/1): 0.28.  $^1\text{H}$  NMR (500 MHz,  $\text{CDCl}_3$ ):  $\delta$  ppm 8.55 (d,  $J = 4.1$  Hz, 1H), 7.81 – 7.77 (m, 1H), 7.51 (d,  $J = 7.8$  Hz, 1H), 7.31 – 7.27 (m, 2H), 7.25 – 7.21 (m, 3H), 7.19 – 7.17 (m, 1H), 7.00 – 6.98 (m, 1H), 6.98 – 6.96 (m, 2H), 6.89 – 6.86 (m, 1H), 5.32 (s, 1H).  $^{13}\text{C}$  NMR (126 MHz,  $\text{CDCl}_3$ ):  $\delta$  ppm 162.6, 156.7, 148.2, 141.3, 138.6, 132.1, 129.5, 128.3, 127.7, 126.6, 124.7, 122.6, 119.8, 59.2. HRMS (EI<sup>+</sup>) calcd. for  $\text{C}_{18}\text{H}_{15}\text{NO}$   $[\text{M}+\text{H}]^+$ : 262.1232, found: 262.1230.

2-((4-(Tert-butyl)phenoxy)(phenyl)methyl)pyridine **7ab**

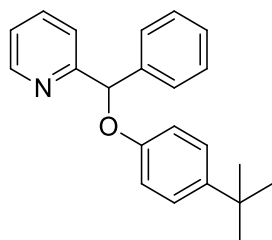

**7ab** was prepared according to the general procedure **B** in 50% yield (32.0 mg, 0.1 mmol) from 0.2 mmol of **1a**. Colorless liquid.  $R_f$  (hexanes/EtOAc = 4/1): 0.35.  $^1\text{H}$  NMR (500 MHz,  $\text{CDCl}_3$ ):  $\delta$  8.58 (d,  $J = 4.7$  Hz, 1H), 7.66 – 7.61 (m, 1H), 7.59 – 7.56 (m, 1H), 7.55 – 7.53 (m, 2H), 7.35 – 7.31 (m, 2H), 7.30 – 7.26 (m, 1H), 7.26 – 7.23 (m, 2H), 7.18 – 7.15 (m, 1H), 6.93 – 6.91 (m, 2H), 6.33 (s, 1H), 1.27 (s, 9H).  $^{13}\text{C}$  NMR (126 MHz,  $\text{CDCl}_3$ ):  $\delta$  ppm 161.1, 155.6, 149.2, 143.8, 140.5, 137.1, 128.6, 127.9, 126.9, 126.3, 122.6, 120.9, 115.4, 82.6, 34.1, 31.6. HRMS (EI<sup>+</sup>) calcd. for  $\text{C}_{22}\text{H}_{23}\text{NO}$   $[\text{M}+\text{H}]^+$ : 318.1858, found: 318.1852.

4-(Tert-butyl)-2-(phenyl(pyridin-2-yl)methyl)phenol **7ab'**

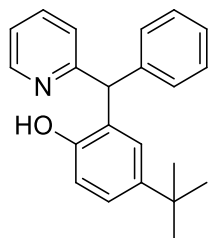

**7ab'** was prepared according to the general procedure **B** in 21% yield (13.5 mg, 0.042 mmol) from 0.2 mmol of **1a**. Colorless liquid.  $R_f$  (hexanes/EtOAc = 4/1): 0.28.  $^1\text{H}$  NMR (500 MHz,  $\text{CDCl}_3$ ):  $\delta$  8.54 (d,  $J = 4.9$  Hz, 1H), 7.82 – 7.79 (m, 1H), 7.54 (d,  $J = 7.7$  Hz, 1H), 7.29 – 7.21 (m, 6H), 7.20 – 7.17 (m, 1H), 7.00 – 6.96 (m, 2H), 6.95–6.92 (m, 1H), 5.32 (s, 1H), 1.33 (s, 9H).  $^{13}\text{C}$  NMR (126 MHz,  $\text{CDCl}_3$ ):  $\delta$  ppm 162.8, 154.1, 148.2, 142.4, 141.5, 138.5, 128.9, 128.3, 127.8, 126.8, 126.5, 126.3, 124.8, 122.5, 119.1, 59.8, 34.1, 31.7. HRMS (EI<sup>+</sup>) calcd. for  $\text{C}_{22}\text{H}_{23}\text{NO}$   $[\text{M}+\text{H}]^+$ : 318.1858 found: 318.1857.

2-(Phenyl(3-(trifluoromethyl)phenoxy)methyl)pyridine **7ac**

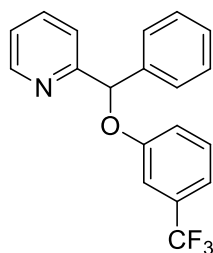

**7ac** was prepared according to the general procedure **B** in 52% yield (36.0 mg, 0.1 mmol) from 0.2 mmol of **1a**. Colorless liquid.  $R_f$  (hexanes/EtOAc = 4/1): 0.32.  $^1\text{H}$  NMR (400 MHz,  $\text{CDCl}_3$ ):  $\delta$  ppm 8.59 (d,  $J = 4.9$  Hz, 1H), 7.74 – 7.69 (m, 1H), 7.56 (d,  $J = 7.9$  Hz, 1H), 7.55 – 7.48 (m, 2H), 7.37 – 7.33 (m, 2H), 7.31 – 7.27 (m, 3H), 7.24 – 7.22 (m, 1H), 7.18 – 7.16 (m, 1H), 7.13 – 7.10 (m, 1H), 6.39 (s, 1H).  $^{13}\text{C}$  NMR (101 MHz,  $\text{CDCl}_3$ ):  $\delta$  ppm 160.1, 157.8, 149.2, 139.4, 137.6, 130.2, 130.1, 128.9, 128.3, 126.8, 123.1, 121.1, 118.8, 118.0, 117.0, 113.6, 113.6, 82.8. HRMS (EI<sup>+</sup>) calcd. for  $\text{C}_{19}\text{H}_{14}\text{NOF}_3$   $[\text{M}+\text{H}]^+$ : 330.1106, found: 330.1102.

2-((3-Chlorophenoxy)(phenyl)methyl)pyridine **7ad**

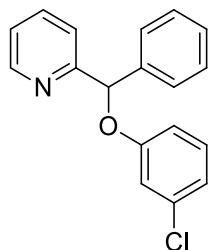

**7ad** was prepared according to the general procedure **B** in 59% yield (35.0 mg, 0.118 mmol) from 0.2 mmol of **1a**. Colorless liquid.  $R_f$  (hexanes/EtOAc = 4/1): 0.3.  $^1\text{H}$  NMR (500 MHz,  $\text{CDCl}_3$ ):  $\delta$  ppm 8.58 (d,  $J = 4.2$  Hz, 1H), 7.69 – 7.67 (m, 1H), 7.54 – 7.50 (m, 3H), 7.36 – 7.33 (m, 2H), 7.29 – 7.28 (m, 1H), 7.20 – 7.18 (m, 1H), 7.14 – 7.11 (m, 1H), 7.02 – 7.01 (m, 1H), 6.91 – 6.89 (m, 1H), 6.86 – 6.84 (m, 1H), 6.32 (s, 1H).  $^{13}\text{C}$  NMR (126 MHz,  $\text{CDCl}_3$ ):  $\delta$  ppm 160.3, 158.5, 149.3, 139.7, 137.3, 134.9, 130.3, 128.8, 128.2, 126.8, 122.9, 121.5, 120.9, 116.8, 114.1, 82.9. HRMS (EI+) calcd. for  $\text{C}_{18}\text{H}_{15}\text{NOCl}$   $[\text{M}+\text{H}]^+$ : 296.0842, found: 296.0840.

2-((3-Ethylphenoxy)(phenyl)methyl)pyridine **7ae**

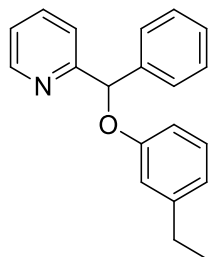

**7ae** was prepared according to the general procedure **B** in 54% yield (31.2 mg, 0.108 mmol) from 0.2 mmol of **1a**. Colorless liquid.  $R_f$  (hexanes/EtOAc = 4/1): 0.32.  $^1\text{H}$  NMR (500 MHz,  $\text{CDCl}_3$ ):  $\delta$  ppm 8.57 (d,  $J = 4.8$  Hz, 1H), 7.66 – 7.65 (m, 1H), 7.58 – 7.56 (m, 1H), 7.54 – 7.52 (m, 2H), 7.35 – 7.32 (m, 2H), 7.27 – 7.26 (m, 1H), 7.17 – 7.15 (m, 1H), 7.13 – 7.10 (m, 1H), 6.87 – 6.85 (m, 1H), 6.77 – 6.75 (m, 2H), 6.34 (s, 1H), 2.57 (q,  $J = 7.6$  Hz, 2H), 1.16 (t,  $J = 7.6$  Hz, 3H).  $^{13}\text{C}$  NMR (126 MHz,  $\text{CDCl}_3$ ):  $\delta$  ppm 160.1, 157.9, 149.2, 146.0, 139.3, 137.2, 129.3, 128.7, 127.9, 126.9, 122.6, 120.9, 115.9, 112.9, 110.3, 82.5, 28.9, 15.4. HRMS (EI+) calcd. for  $\text{C}_{20}\text{H}_{20}\text{NO}$   $[\text{M}+\text{H}]^+$ : 290.1545, found: 290.1548.

### 3-(Phenyl(pyridin-2-yl)methoxy)benzonitrile **7af**

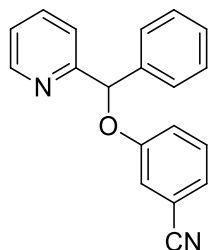

**7af** was prepared according to the general procedure **B** in 51% yield (29.0 mg, 0.101 mmol) from 0.2 mmol of **1a**. Colorless liquid.  $R_f$  (hexanes/EtOAc = 7/3): 0.32.  $^1\text{H}$  NMR (500 MHz,  $\text{CDCl}_3$ ):  $\delta$  ppm 8.59 (d,  $J = 4.6$  Hz, 1H), 7.69 – 7.59 (m, 1H), 7.51 – 7.49 (m, 3H), 7.38 – 7.35 (m, 2H), 7.33 – 7.28 (m, 2H), 7.24 – 7.19 (m, 4H), 6.33 (s, 1H).  $^{13}\text{C}$  NMR (126 MHz,  $\text{CDCl}_3$ ):  $\delta$  ppm 159.8, 157.9, 149.5, 139.2, 137.3, 130.5, 128.9, 128.4, 126.7, 125.1, 123.1, 120.9, 120.9, 119.4, 118.7, 113.4, 83.2. HRMS (EI+) calcd. for  $\text{C}_{19}\text{H}_{15}\text{N}_2\text{O}$   $[\text{M}+\text{H}]^+$ : 287.1184, found: 287.1184.

### 2-(Isopropoxy(phenyl)methyl)pyridine **7ag**

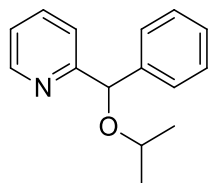

**7ag** was prepared according to the general Method A in 70% yield (32.0 mg, 0.141 mmol) from 0.2 mmol of **1a**. colorless liquid.  $R_f$  (hexanes/EtOAc = 4/1): 0.4.  $^1\text{H}$  NMR (400 MHz,  $\text{CDCl}_3$ ):  $\delta$  8.54 – 8.47 (m, 1H), 7.67 – 7.65 (m, 1H), 7.56 – 7.50 (m, 1H), 7.47 – 7.40 (m, 2H), 7.31 – 7.27 (m, 2H), 7.25 – 7.19 (m, 1H), 7.13 – 7.10 (m, 1H), 5.62 (s, 1H), 3.71 (dt,  $J = 12.2, 6.1$  Hz, 1H), 1.25 (d,  $J = 6.1$  Hz, 3H), 1.22 (d,  $J = 6.1$  Hz, 3H).  $^{13}\text{C}$  NMR (101 MHz,  $\text{CDCl}_3$ ):  $\delta$  ppm 162.8, 148.9, 142.0, 136.8, 128.4, 127.5, 127.0, 122.3, 120.8, 81.9, 69.7, 22.4, 22.3. HRMS (EI+) calcd. for  $\text{C}_{15}\text{H}_{17}\text{NO}$   $[\text{M}+\text{H}]^+$ : 228.1388, found: 228.1385.

2-((Isopentyloxy)(phenyl)methyl)pyridine **7ah**

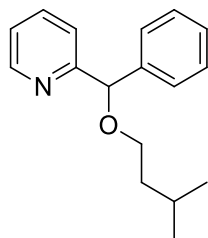

**7ah** was prepared according to the general procedure **B** in 60% yield (31.0 mg, 0.121 mmol) from 0.2 mmol of **1a**. colorless liquid.  $R_f$  (hexanes/EtOAc = 4/1): 0.4.  $^1\text{H}$  NMR (400 MHz,  $\text{CDCl}_3$ ):  $\delta$  8.52 (d,  $J = 4.1$ , Hz, 1H), 7.68 – 7.66 (m, 1H), 7.53 – 7.49 (m, 1H), 7.50 – 7.38 (m, 2H), 7.36 – 7.29 (m, 2H), 7.24 – 7.20 (m, 1H), 7.14 – 7.11 (m, 1H), 5.46 (s, 1H), 3.62 – 3.45 (m, 2H), 1.83 – 1.74 (m, 1H), 1.56 (dt,  $J = 7.0, 4.0$  Hz, 2H), 0.89 (d,  $J = 6.6$  Hz, 6H).  $^{13}\text{C}$  NMR (101 MHz,  $\text{CDCl}_3$ ):  $\delta$  ppm 162.3, 149.0, 141.6, 136.9, 128.5, 127.6, 127.0, 122.3, 120.7, 85.0, 67.9, 38.8, 25.2, 22.8, 22.7. HRMS (EI<sup>+</sup>) calcd. for  $\text{C}_{17}\text{H}_{21}\text{NO}$   $[\text{M}+\text{H}]^+$ : 256.1701, found: 256.1699.

2-(Cyclobutoxy(phenyl)methyl)pyridine **7ai**

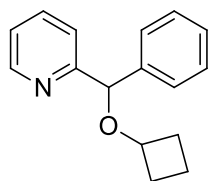

**7ai** was prepared according to the general procedure **B** in 67% yield (32.0 mg, 0.134 mmol) from 0.2 mmol of **1a**. Colorless liquid.  $R_f$  (hexanes/EtOAc = 4/1): 0.4.  $^1\text{H}$  NMR (400 MHz,  $\text{CDCl}_3$ ):  $\delta$  ppm 8.54 – 8.49 (m, 1H), 7.68 – 7.66 (m, 1H), 7.54 – 7.50 (m, 1H), 7.42 (m, 2H), 7.33 – 7.29 (m, 2H), 7.26 – 7.21 (m, 1H), 7.16 – 7.10 (m, 1H), 5.47 (s, 1H), 4.09 – 3.96 (m, 1H), 2.20 – 2.11 (m, 2H), 2.02 (ddd,  $J = 9.4, 8.5, 4.6$  Hz, 2H), 1.67 (dt,  $J = 19.3, 9.8$  Hz, 1H), 1.49 – 1.37 (m, 1H).  $^{13}\text{C}$  NMR (101 MHz,  $\text{CDCl}_3$ ):  $\delta$  ppm 162.2, 149.0, 141.5, 136.8, 128.4, 127.6, 127.1, 122.3, 121.0, 82.2, 71.9, 30.8, 30.7, 12.6. HRMS (EI<sup>+</sup>) calcd. for  $\text{C}_{16}\text{H}_{17}\text{NO}$   $[\text{M}+\text{H}]^+$ : 240.1388, found: 240.1385.

2-(Phenyl(((4R)-1,7,7-trimethylbicyclo[2.2.1]heptan-2-yl)oxy)methyl)pyridine **7aj**

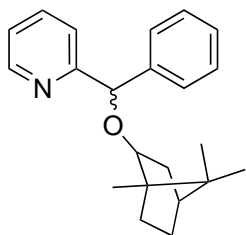

**7aj** was prepared according to the general procedure **B** in 65% yield (dr 1:1) (42.0 mg, 0.131 mmol) from 0.2 mmol of **1a**. Colorless liquid.  $R_f$  (hexanes/EtOAc = 4/1): 0.37.  $^1\text{H}$  NMR (500 MHz,  $\text{CDCl}_3$ ):  $\delta$  ppm 8.51 (d,  $J = 4.9$  Hz, 1H), 8.47 (d,  $J = 4.8$  Hz, 1H), 7.67 – 7.64 (m, 2H), 7.63 – 7.61 (m, 2H), 7.54 – 7.52 (m, 2H), 7.43 – 7.41 (m, 4H), 7.32 – 7.26 (m, 4H), 7.24 – 7.19 (m, 2H), 7.16 – 7.09 (m, 2H), 5.52 (s, 1H), 5.49 (s, 1H), 3.76 – 3.69 (m, 2H).  $^1\text{H}$  NMR contains small impurity of corresponding alcohol.  $^{13}\text{C}$  NMR (126 MHz,  $\text{CDCl}_3$ ):  $\delta$  ppm 163.4, 162.9, 148.7, 142.7, 141.9, 136.9, 128.3, 128.3, 127.5, 127.2, 126.7, 122.4, 122.1, 121.0, 121.8, 83.1, 82.9, 82.8, 82.5, 49.5, 48.1, 47.8, 45.2, 39.1, 36.2, 36.1, 29.8, 28.4, 27.1, 27.1, 26.0, 20.3, 19.9, 19.0, 18.8, 14.0, 13.4. HRMS (EI+) calcd. for  $\text{C}_{22}\text{H}_{27}\text{NO}$   $[\text{M}+\text{H}]^+$ : 322.2171, found: 322.2165.

2-((4-(Methylthio)butoxy)(phenyl)methyl)pyridine **7ak**

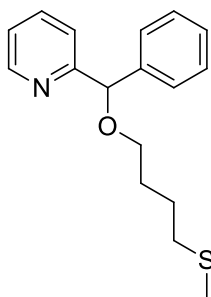

**7ak** was prepared according to the general procedure **B** in 47% yield (27.0 mg, 0.0939 mmol) from 0.2 mmol of **1a**. Colorless liquid.  $R_f$  (hexanes/EtOAc = 4/1): 0.39.  $^1\text{H}$  NMR (400 MHz,  $\text{CDCl}_3$ ):  $\delta$  ppm 8.51 (d,  $J = 4.8$  Hz, 1H), 7.67 – 7.65 (m, 1H), 7.52 – 7.40 (m, 1H), 7.43 – 7.41 (m, 2H), 7.32 – 7.28 (m, 2H), 7.26 – 7.21 (m, 1H), 7.16 – 7.11 (m, 1H), 5.46 (s, 1H), 3.56 – 3.49 (m, 2H), 2.51 (t,  $J = 7.0$  Hz, 2H), 2.08 (s, 3H), 1.75 (ddd,  $J = 9.9, 6.3, 2.3$  Hz, 4H).  $^{13}\text{C}$  NMR (101 MHz,  $\text{CDCl}_3$ ):  $\delta$  ppm 162.1, 149.0, 141.4, 136.9, 128.5, 127.7, 126.9, 122.4, 120.6, 84.9, 68.9, 34.1, 29.0, 26.0, 15.6. HRMS (EI+) calcd. for  $\text{C}_{17}\text{H}_{21}\text{NOS}$   $[\text{M}+\text{H}]^+$ : 288.1422, found: 288.1418.

2-((Allyloxy)(phenyl)methyl)pyridine **7al**

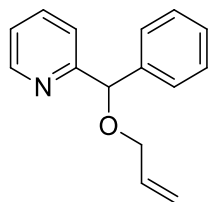

**7al** was prepared according to the general procedure **B** in 58% yield (26.0 mg, 0.115 mmol) from 0.2 mmol of **1a**. Colorless liquid.  $R_f$  (hexanes/EtOAc = 4/1): 0.4.  $^1\text{H}$  NMR (400 MHz,  $\text{CDCl}_3$ ):  $\delta$  ppm 8.53 (d,  $J = 4.9$  Hz, 1H), 7.67 – 7.64 (m, 1H), 7.56 – 7.50 (m, 1H), 7.46 – 7.44 (m, 2H), 7.34 – 7.30 (m, 2H), 7.26 – 7.23 (m, 1H), 7.16 – 7.13 (m, 1H), 6.03 – 5.93 (m, 1H), 5.56 (s, 1H), 5.35 – 5.29 (m, 1H), 5.22 – 5.19 (m, 1H), 4.12 – 4.02 (m, 2H).  $^{13}\text{C}$  NMR (101 MHz,  $\text{CDCl}_3$ ):  $\delta$  ppm 161.9, 149.1, 141.1, 136.9, 134.6, 128.5, 127.8, 127.1, 122.4, 120.7, 117.2, 84.0, 70.0. HRMS (EI+) calcd. for  $\text{C}_{15}\text{H}_{15}\text{NO}$   $[\text{M}+\text{H}]^+$ : 226.1232, found: 226.1229.

2-(((3,7-Dimethyloct-6-en-1-yl)oxy)(phenyl)methyl)pyridine **7am**

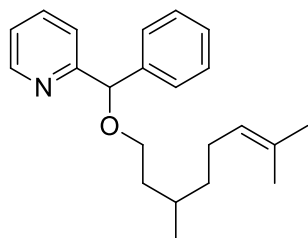

**7am** was prepared according to the general procedure **B** in 56% yield (36.0 mg, 0.111 mmol) from 0.2 mmol of **1a**. colorless liquid.  $R_f$  (hexanes/EtOAc = 4/1): 0.38.  $^1\text{H}$  NMR (400 MHz,  $\text{CDCl}_3$ ):  $\delta$  ppm 8.52 (d,  $J = 4.5$  Hz, 1H), 7.67 – 7.65 (m, 1H), 7.53 (d,  $J = 7.9$  Hz, 1H), 7.43 – 7.38 (m, 2H), 7.31 – 7.27 (m, 2H), 7.23 – 7.20 (m, 1H), 7.13 (dd,  $J = 6.7, 5.5$  Hz, 1H), 5.46 (s, 1H), 5.09 (d,  $J = 6.9$  Hz, 1H), 3.59 – 3.47 (m, 2H), 2.02–1.93 (m, 2H), 1.74 – 1.71 (m, 1H), 1.68 (s, 3H), 1.59 (s, 3H), 1.51–1.43 (m, 1H), 1.38 – 1.31 (m, 2H), 1.18 – 1.14 (m, 1H), 0.87 (d,  $J = 6.6$  Hz, 3H).  $^{13}\text{C}$  NMR (101 MHz,  $\text{CDCl}_3$ ):  $\delta$  ppm 162.3, 149.0, 141.6, 136.9, 131.2, 128.5, 127.6, 127.0, 124.9, 122.3, 120.6, 85.0, 67.8, 36.9, 29.7, 25.8, 25.6, 19.7, 17.7. HRMS (EI+) calcd. for  $\text{C}_{22}\text{H}_{29}\text{NO}$   $[\text{M}+\text{H}]^+$ : 324.2327, found: 324.2325.

2-((2-Chloroethoxy)(4-chlorophenyl)methyl)pyridine **7fn**

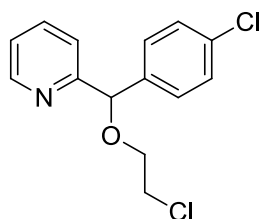

**7fn** was prepared according to the general procedure **B** in 80% yield (45.0 mg, 0.161 mmol) from 0.2 mmol of **1f**. Colorless liquid.  $R_f$  (hexanes/EtOAc = 3/1): 0.3.  $^1\text{H}$  NMR (500 MHz,  $\text{CDCl}_3$ ):  $\delta$  ppm 8.53 (d,  $J$  = 4.7 Hz, 1H), 7.70 – 7.67 (m, 1H), 7.55 – 7.53 (m, 1H), 7.39 – 7.37 (m, 2H), 7.30 – 7.29 (m, 2H), 7.19 – 7.14 (m, 1H), 5.52 (s, 1H), 3.78 (dd,  $J$  = 10.2, 5.1 Hz, 2H), 3.70 (t,  $J$  = 5.3 Hz, 2H).  $^{13}\text{C}$  NMR (126 MHz,  $\text{CDCl}_3$ ):  $\delta$  ppm 160.9, 149.2, 139.2, 137.1, 133.7, 128.8, 128.4, 122.8, 120.7, 84.4, 69.4, 43.0. LRMS (EI+) calcd. for  $\text{C}_{14}\text{H}_{13}\text{NOCl}_2$  [M]: 282.0448.

*N*-(Phenyl(pyridin-2-yl)methyl)aniline **8aa**

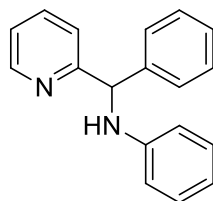

**8aa** was prepared according to the general procedure **B** in 10% yield (5.3 mg, 0.020 mmol) from 0.2 mmol of **1a**. colorless liquid.  $R_f$  (hexanes/EtOAc = 4/1): 0.3.  $^1\text{H}$  NMR (400 MHz,  $\text{CDCl}_3$ ):  $\delta$  ppm 8.62 – 8.57 (m, 1H), 7.63 – 7.60 (m, 1H), 7.48 – 7.43 (m, 2H), 7.38 (d,  $J$  = 7.9 Hz, 1H), 7.35 – 7.29 (m, 2H), 7.25 – 7.22 (m, 1H), 7.17 – 7.15 (m, 1H), 7.14 – 7.10 (m, 2H), 6.67 – 6.66 (m, 1H), 6.65 – 6.61 (m, 2H), 5.58 (d,  $J$  = 4.4 Hz, 1H), 5.46 (s, 1H).  $^{13}\text{C}$  NMR (101 MHz,  $\text{CDCl}_3$ ):  $\delta$  ppm 161.0, 149.3, 147.1, 142.6, 136.9, 129.2, 128.9, 127.6, 127.5, 122.3, 122.0, 117.6, 113.7, 63.4. HRMS (EI+) calcd. for  $\text{C}_{18}\text{H}_{16}\text{N}_2$  [M+H] $^+$ : 261.1392, found: 261.1388.

N-(Phenyl(pyridin-2-yl)methyl)benzenesulfonamide **8ab**

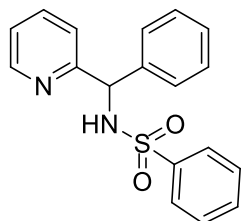

**8ab** was prepared according to the general procedure **B** in 50% yield (32.6 mg, 0.1 mmol) from 0.2 mmol of **1a**. White solid.  $R_f$  (hexanes/EtOAc = 2/1): 0.35.  $^1\text{H}$  NMR (500 MHz,  $\text{CDCl}_3$ ):  $\delta$  ppm 8.46 (d,  $J$  = 4.7 Hz, 1H), 7.64 – 7.63 (m, 2H), 7.51 (d,  $J$  = 7.6 Hz, 1H), 7.38 – 7.35 (m, 1H), 7.27–7.24 (m, 2H), 7.18 – 7.14 (m, 5H), 7.13 – 7.10 (m, 1H), 7.01 – 6.98 (m, 2H), 5.57 (d,  $J$  = 6.1 Hz, 1H).  $^{13}\text{C}$  NMR (126 MHz,  $\text{CDCl}_3$ ):  $\delta$  ppm 157.6, 148.6, 140.1, 136.9, 132.1, 129.2, 128.6, 127.8, 127.7, 127.1, 126.5, 122.6, 122.5, 61.0. HRMS (EI<sup>+</sup>) calcd. for  $\text{C}_{18}\text{H}_{16}\text{N}_2\text{O}_2\text{S}$   $[\text{M}+\text{H}]^+$ : 325.1011, found: 325.1003.

4-Methyl-N-(phenyl(pyridin-2-yl)methyl)benzenesulfonamide **8ac**

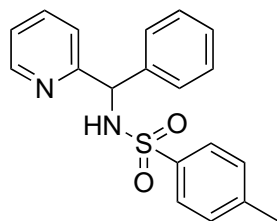

**8ac** was prepared according to the general procedure **B** in 40% yield (27.2 mg, 0.08 mmol) from 0.2 mmol of **1a**. White solid  $R_f$  (hexanes/EtOAc = 2/1): 0.35.  $^1\text{H}$  NMR (500 MHz,  $\text{CDCl}_3$ ):  $\delta$  ppm 8.47 (d,  $J$  = 4.6 Hz, 1H), 7.54 – 7.52 (m, 3H), 7.20 – 7.15 (m, 5H), 7.13 – 7.11 (m, 1H), 7.06 – 7.04 (m, 2H), 7.01 – 7.00 (m, 1H), 6.91 (d,  $J$  = 5.9 Hz, 1H), 5.53 (d,  $J$  = 6.1 Hz, 1H), 2.31 (s, 3H).  $^{13}\text{C}$  NMR (126 MHz,  $\text{CDCl}_3$ ):  $\delta$  ppm 157.8, 148.6, 142.9, 140.5, 136.8, 129.8, 129.2, 128.6, 127.8, 127.2, 126.6, 122.5, 122.5, 61.0, 21.5. HRMS (EI<sup>+</sup>) calcd. for  $\text{C}_{19}\text{H}_{18}\text{N}_2\text{O}_2\text{S}$   $[\text{M}+\text{H}]^+$ : 339.1167, found: 339.1162.

*N*-Methyl-*N*-(phenyl(pyridin-2-yl)methyl)benzenesulfonamide **8ad**

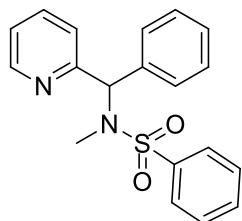

**8ad** was prepared according to the general procedure **B** in 74% yield (50 mg, 0.148 mmol) from 0.2 mmol of **1a**. Colorless liquid  $R_f$  (hexanes/EtOAc = 3/1): 0.28.  $^1\text{H}$  NMR (400 MHz,  $\text{CDCl}_3$ ):  $\delta$  ppm 8.47 – 8.39 (m, 1H), 7.72 – 7.70 (m, 2H), 7.62 – 7.58 (m, 1H), 7.49 – 7.47 (m, 1H), 7.40 – 7.36 (m, 2H), 7.25 – 7.24 (m, 4H), 7.16 – 7.13 (m, 1H), 7.05 – 6.98 (m, 2H), 6.45 (s, 1H), 2.85 (s, 3H).  $^{13}\text{C}$  NMR (101 MHz,  $\text{CDCl}_3$ ):  $\delta$  ppm 158.4, 149.4, 139.7, 137.8, 136.5, 132.3, 129.2, 128.8, 128.5, 127.9, 127.3, 123.4, 122.5, 65.0, 32.0. HRMS (EI+) calcd. for  $\text{C}_{15}\text{H}_{13}\text{NO}_2\text{S}$   $[\text{M}+\text{H}]^+$ : 339.1167, found: 339.1165.

*N*,4-dimethyl-*N*-(phenyl(pyridin-2-yl)methyl)benzenesulfonamide **8ae**

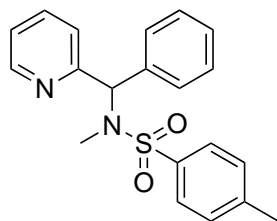

**8ae** was prepared according to the general procedure **B** in 64% yield (45 mg, 0.128 mmol) from 0.2 mmol of **1a**. White solid  $R_f$  (hexanes/EtOAc = 3/1): 0.3.  $^1\text{H}$  NMR (400 MHz,  $\text{CDCl}_3$ ):  $\delta$  ppm 8.45 (d,  $J$  = 4.1 Hz, 1H), 7.65 – 7.59 (m, 3H), 7.28 – 7.23 (m, 4H), 7.18 – 7.14 (m, 3H), 7.02 – 7.00 (m, 2H), 6.45 (s, 1H), 2.82 (s, 3H), 2.39 (s, 3H).  $^{13}\text{C}$  NMR (101 MHz,  $\text{CDCl}_3$ ):  $\delta$  ppm 158.6, 149.4, 143.0, 137.9, 136.8, 136.5, 129.4, 129.2, 128.5, 127.8, 127.4, 123.4, 122.4, 65.0, 31.9, 21.6. HRMS (EI+) calcd. for  $\text{C}_{20}\text{H}_{20}\text{N}_2\text{O}_2\text{S}$   $[\text{M}+\text{H}]^+$ : 353.1324, found: 353.1322.

*N*-(phenyl(pyridin-2-yl)methyl)methanesulfonamide **8af**

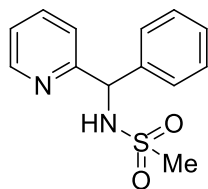

**8af** was prepared according to the general procedure **B** in 61% yield (32 mg, 0.122 mmol) from 0.2 mmol of **1a**. White solid  $R_f$  (hexanes/EtOAc = 1/1): 0.3.  $^1\text{H}$  NMR (400 MHz,  $\text{CDCl}_3$ ):  $\delta$  ppm 8.56 (d,  $J$  = 4.4 Hz, 1H), 7.64 – 7.62 (m, 1H), 7.39 – 7.29 (m, 5H), 7.23 – 7.19 (m, 1H), 7.14 – 7.12 (m, 1H), 6.92 (d,  $J$  = 5.1 Hz, 1H), 5.73 (d,  $J$  = 5.4 Hz, 1H), 2.58 (s, 3H).  $^{13}\text{C}$  NMR (101 MHz,  $\text{CDCl}_3$ ):  $\delta$  ppm 157.6, 148.6, 140.7, 137.2, 129.1, 128.3, 128.0, 122.9, 122.6, 60.9, 42.0. HRMS (EI<sup>+</sup>) calcd. for  $\text{C}_{13}\text{H}_{14}\text{N}_2\text{O}_2\text{S}$   $[\text{M}+\text{H}]^+$ : 263.0854, found: 263.0850.

1,1,1-Trifluoro-*N*-(phenyl(pyridin-2-yl)methyl)methanesulfonamide **8ag**

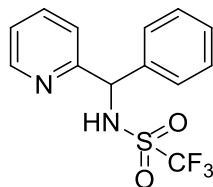

**8ag** was prepared according to the general procedure **B** in 90% yield (57 mg, 0.18 mmol) from 0.2 mmol of **1a**. White solid  $R_f$  (hexanes/EtOAc = 1/1): 0.25.  $^1\text{H}$  NMR (400 MHz,  $\text{CDCl}_3$ ):  $\delta$  ppm 8.58 (d,  $J$  = 4.3 Hz, 1H), 7.70 – 7.66 (m, 1H), 7.39 – 7.28 (m, 6H), 7.28 – 7.25 (m, 1H), 7.18 – 7.16 (m, 1H), 5.80 (s, 1H).  $^{13}\text{C}$  NMR (101 MHz,  $\text{CDCl}_3$ ):  $\delta$  ppm 156.4, 148.6, 140.1, 137.6, 129.0, 128.6, 127.4, 123.3, 122.4, 61.4. HRMS (EI<sup>+</sup>) calcd. for  $\text{C}_{13}\text{H}_{11}\text{N}_2\text{O}_2\text{SF}_3$   $[\text{M}+\text{H}]^+$ : 317.0572, found: 317.0571.

2-(Phenyl(pyridin-2-yl)methyl)isoindoline-1,3-dione **8ah**

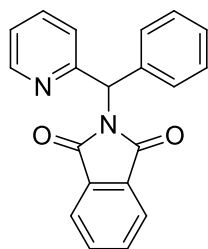

**8ah** was prepared according to the general procedure **B** in 50% yield (35 mg, 0.1 mmol) from 0.2 mmol of **1a**. White solid  $R_f$  (hexanes/EtOAc = 1/1): 0.3.  $^1\text{H}$  NMR (500 MHz,  $\text{CDCl}_3$ ):  $\delta$  ppm 8.55 (d,  $J = 4.4$  Hz, 1H), 7.84 – 7.83 (m, 2H), 7.71 – 7.70 (m, 2H), 7.64 – 7.63 (m, 1H), 7.53 – 7.51 (m, 2H), 7.40 – 7.33 (m, 3H), 7.21 – 7.17 (m, 2H), 6.73 (s, 1H).  $^{13}\text{C}$  NMR (126 MHz,  $\text{CDCl}_3$ ):  $\delta$  ppm 168.2, 157.5, 149.3, 137.6, 136.4, 134.1, 132.2, 129.7, 128.8, 128.3, 123.5, 123.0, 122.4, 59.5. HRMS (EI+) calcd. for  $\text{C}_{20}\text{H}_{14}\text{N}_2\text{O}_2$   $[\text{M}+\text{H}]^+$ : 315.1134, found: 315.1128.

Phenyl(pyridin-2-yl)methyl pentanoate **9aa**

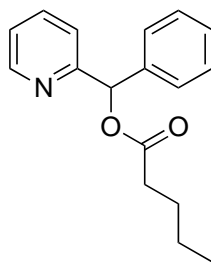

**9aa** was prepared according to the general procedure **B** in 65% yield (35 mg, 0.13 mmol) from 0.2 mmol of **1a**. Colorless liquid  $R_f$  (hexanes/EtOAc = 4/1): 0.3.  $^1\text{H}$  NMR (500 MHz,  $\text{CDCl}_3$ ):  $\delta$  ppm 8.58 (d,  $J = 4.1$  Hz, 1H), 7.69 – 7.67 (m, 1H), 7.44 – 7.40 (m, 3H), 7.35 – 7.32 (m, 2H), 7.29 – 7.26 (m, 1H), 7.19 – 7.16 (m, 1H), 6.89 (s, 1H), 2.47 (t,  $J = 7.6$  Hz, 2H), 1.70 – 1.63 (m, 2H), 1.39 – 1.31 (m, 2H), 0.91 (t,  $J = 7.4$  Hz, 3H).  $^{13}\text{C}$  NMR (126 MHz,  $\text{CDCl}_3$ ):  $\delta$  ppm 172.8, 159.5, 149.6, 139.3, 136.8, 128.6, 128.2, 127.4, 122.7, 120.9, 77.8, 34.3, 27.0, 22.3, 13.8. HRMS (EI+) calcd. for  $\text{C}_{17}\text{H}_{19}\text{NO}_2$   $[\text{M}+\text{H}]^+$ : 270.1494, found: 270.1490.

Phenyl(pyridin-2-yl)methyl dodecanoate **9ab**

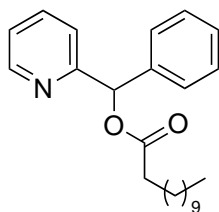

**9ab** was prepared according to the general procedure **B** in 63% yield (46 mg, 0.125 mmol) from 0.2 mmol of **1a**. Colorless liquid  $R_f$  (hexanes/EtOAc = 4/1): 0.3.  $^1\text{H}$  NMR (500 MHz,  $\text{CDCl}_3$ ):  $\delta$  ppm 8.57 (d,  $J = 4.2$  Hz, 1H), 7.71 – 7.67 (m, 1H), 7.43 – 7.42 (m, 3H), 7.35 – 7.32 (m, 2H), 7.29 – 7.27 (m, 1H), 7.20 – 7.17 (m, 1H), 6.89 (s, 1H), 2.46 (t,  $J = 7.5$  Hz, 2H), 1.69–1.65 (m, 2H), 1.28–

1.25 (m, 16H), 0.87 (d,  $J = 7.1$  Hz, 3H).  $^{13}\text{C}$  NMR (126 MHz,  $\text{CDCl}_3$ ):  $\delta$  ppm 172.8, 159.5, 149.6, 139.3, 136.8, 128.6, 128.2, 127.4, 122.7, 120.9, 77.8, 34.6, 32.0, 30.0, 29.7, 29.5, 29.4, 29.3, 29.2, 25.0, 22.8, 14.2. HRMS (EI<sup>+</sup>) calcd. for  $\text{C}_{24}\text{H}_{33}\text{NO}_2$   $[\text{M}+\text{H}]^+$ : 368.2590, found: 368.2585.

(4-Methoxyphenyl)(pyridin-2-yl)methyl benzoate **9cc**

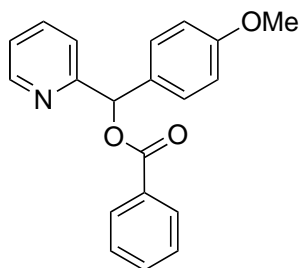

**9cc** was prepared according to the general procedure **B** in 60% yield (38.5 mg, 0.121 mmol) from 0.2 mmol of **1c**. Colorless solid  $R_f$  (hexanes/EtOAc = 2/3): 0.3.  $^1\text{H}$  NMR (500 MHz,  $\text{CDCl}_3$ ):  $\delta$  ppm 8.64 (d,  $J = 4.7$  Hz, 1H), 8.17 – 8.16 (m, 2H), 7.71 – 7.72 (m, 1H), 7.59 – 7.54 (m, 2H), 7.50 – 7.43 (m, 4H), 7.22 – 7.20 (m, 1H), 7.11 (s, 1H), 6.90 – 6.88 (m, 2H), 3.78 (s, 3H).  $^{13}\text{C}$  NMR (126 MHz,  $\text{CDCl}_3$ ):  $\delta$  ppm 165.6, 159.6, 159.5, 149.5, 137.1, 133.3, 130.1, 129.9, 129.0, 128.5, 128.4, 122.8, 120.7, 114.1, 78.1, 55.3. HRMS (EI<sup>+</sup>) calcd. for  $\text{C}_{20}\text{H}_{17}\text{NO}_3$   $[\text{M}+\text{H}]^+$ : 320.1287, found: 320.1278.

2-(1,2-Diphenylcyclopropyl)pyridine **11aa**

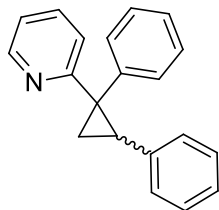

**11aa** was prepared according to the general procedure **C** in 77% yield, dr 1.33:1, (42 mg, 0.155 mmol) from 0.2 mmol of **1a**. Colorless liquid.  $R_f$  (hexanes/EtOAc = 4/1): 0.2.  $^1\text{H}$  NMR (500 MHz,  $\text{CDCl}_3$ )  $\delta$  8.60 (d,  $J = 4.1$  Hz, 1H), 8.43 (d,  $J = 4.0$  Hz, 1H), 7.49 – 7.47 (m, 1H), 7.43 – 7.24 (m, 4H), 7.24 – 7.15 (m, 3H), 7.15 – 7.01 (m, 7H), 6.98 – 6.96 (m, 2H), 6.94 – 6.92 (m, 1H), 6.85 – 6.83 (m, 2H), 6.77 (d,  $J = 7.9$  Hz, 1H), 3.34 (t,  $J = 7.9$  Hz, 1H), 3.02 (t,  $J = 7.8$  Hz, 1H), 2.55 (t,  $J = 6.0$  Hz, 1H), 2.25 (dd,  $J = 9.0, 4.5$  Hz, 1H), 2.00 (dd,  $J = 6.7, 4.6$  Hz, 1H), 1.75 (dd,  $J = 8.9, 5.2$  Hz, 1H).  $^{13}\text{C}$  NMR (126 MHz,  $\text{CDCl}_3$ )  $\delta$  ppm 163.9, 159.4, 149.0, 148.5, 145.3, 138.8, 138.4,

138.1, 135.6, 135.5, 132.5, 128.7, 128.5, 128.3, 128.1, 127.9, 127.6, 127.5, 126.8, 126.6, 126.5, 126.0, 125.9, 125.6, 125.5, 121.8, 120.9, 120.2, 77.3, 77.0, 76.8, 41.0, 40.2, 34.2, 32.1, 22.9, 18.9. HRMS (EI<sup>+</sup>) calcd. for C<sub>20</sub>H<sub>17</sub>N [M+H]<sup>+</sup>: 272.1439, found: 272.1427.

2-(1-(4-Methoxyphenyl)-2-phenylcyclopropyl)pyridine **11ba**

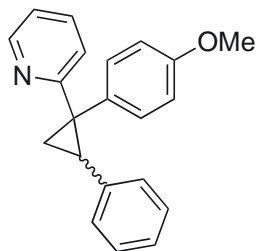

**11ba** was prepared according to the general procedure **C** in 72% yield, dr 1.25:1, (44 mg, 0.146 mmol) from 0.2 mmol of **1b**. Colorless liquid. R<sub>f</sub> (hexanes/EtOAc = 4/1): 0.2. Minor diastereomer <sup>1</sup>H NMR (500 MHz, CDCl<sub>3</sub>) δ ppm 8.57 (d, *J* = 4.2 Hz, 1H), 7.41 (d, *J* = 7.5 Hz, 1H), 7.13 – 6.97 (m, 6H), 6.84 – 6.82 (m, 2H), 6.75 – 6.70 (m, 3H), 3.76 (s, 3H), 3.27 (d, *J* = 7.0 Hz, 1H), 2.21 (dd, *J* = 8.9, 4.4 Hz, 1H), 1.92 (dd, *J* = 6.7, 4.5 Hz, 1H). <sup>13</sup>C NMR (126 MHz, CDCl<sub>3</sub>) δ ppm 164.7, 158.7, 149.4, 139.4, 136.0, 133.9, 130.7, 128.4, 127.9, 125.8, 122.2, 120.5, 113.9, 55.5, 34.7, 23.6. Major diastereomer <sup>1</sup>H NMR (500 MHz, CDCl<sub>3</sub>) δ ppm 8.38 (d, *J* = 3.8 Hz, 1H), 7.42 – 7.40 (m, 2H), 7.31 – 7.24 (m, 1H), 7.07 – 7.00 (m, 2H), 7.02 (d, *J* = 6.0 Hz, 1H), 6.98 – 6.96 (m, 2H), 6.93 – 6.82 (m, 4H), 3.80 (s, 3H), 2.94 (s, 1H), 2.49 (t, *J* = 5.9 Hz, 1H), 1.68 (dd, *J* = 8.9, 5.2 Hz, 1H). <sup>13</sup>C NMR (126 MHz, CDCl<sub>3</sub>) δ ppm 160.2, 148.8, 138.7, 138.0, 135.9, 130.4, 128.5, 128.0, 126.0, 125.9, 121.2, 114.2, 55.7, 32.3, 19.1. HRMS (EI<sup>+</sup>) calcd. for C<sub>21</sub>H<sub>19</sub>NO [M+H]<sup>+</sup>: 302.1545, found: 302.1547.

2-(2-Phenyl-1-(p-tolyl)cyclopropyl)pyridine **11ea**

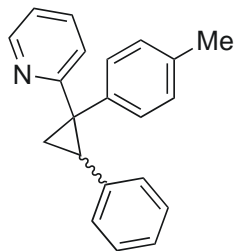

**11ea** was prepared according to the general procedure **C** in 86% yield, dr 1.2:1, (49mg, 0.172 mmol) from 0.2 mmol of **1e**. Colorless liquid.  $R_f$  (hexanes/EtOAc = 4/1): 0.2.  $^1\text{H}$  NMR (500 MHz,  $\text{CDCl}_3$ )  $\delta$  ppm 8.57 (d,  $J = 2.3$  Hz, 1H), 8.40 (d,  $J = 3.1$  Hz, 1H), 7.43 – 7.33 (m, 3H), 7.32 – 7.21 (m, 2H), 7.17 – 7.13 (m, 2H), 7.12 – 7.05 (m, 5H), 7.05 – 6.95 (m, 10H), 6.93 – 6.90 (m, 2H), 6.87 – 6.81 (m, 3H), 6.77 (d,  $J = 8.0$  Hz, 1H), 3.29 (t,  $J = 7.9$  Hz, 1H), 2.98 (t,  $J = 7.8$  Hz, 1H), 2.51 (t,  $J = 6.0$  Hz, 1H), 2.34 (s, 3H), 2.30 (s, 3H), 2.25 – 2.19 (m, 1H), 1.95 (dd,  $J = 6.7, 4.5$  Hz, 1H), 1.70 (dd,  $J = 8.9, 5.2$  Hz, 1H).  $^{13}\text{C}$  NMR (126 MHz,  $\text{CDCl}_3$ )  $\delta$  ppm 164.2, 159.6, 148.9, 148.4, 142.4, 139.0, 138.3, 136.3, 136.1, 135.6, 135.5, 135.1, 132.3, 129.2, 128.9, 128.7, 128.1, 128.0, 127.6, 127.5, 125.8, 125.6, 125.4, 121.8, 120.8, 120.2, 40.7, 39.8, 34.2, 31.9, 23.0, 21.2, 21.0, 18.8. HRMS (EI+) calcd. for  $\text{C}_{21}\text{H}_{19}\text{N}$   $[\text{M}+\text{H}]^+$ : 286.1596, found: 286.1595.

2-(1-(4-bromophenyl)-2-phenylcyclopropyl)pyridine **11ga**

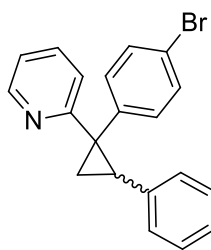

**11ga** was prepared according to the general procedure **C** in 71% yield, dr 1.2:1, (50mg, 0.143 mmol) from 0.2 mmol of **1g**. Colorless liquid.  $R_f$  (hexanes/EtOAc = 4/1): 0.2. Major diastereomer  $^1\text{H}$  NMR (400 MHz,  $\text{CDCl}_3$ )  $\delta$  ppm 8.60 – 8.53 (m, 1H), 7.44 – 7.37 (m, 1H), 7.35 – 7.29 (m, 2H), 7.08 – 7.03 (m, 4H), 7.01 – 6.94 (m, 2H), 6.84 – 6.80 (m, 2H), 6.75 – 6.96 (m, 1H), 3.33 (dd,  $J = 9.0, 6.9$  Hz, 1H), 2.23 (dd,  $J = 9.0, 4.6$  Hz, 1H), 1.95 (dd,  $J = 6.9, 4.6$  Hz, 1H).  $^{13}\text{C}$  NMR (101 MHz,  $\text{CDCl}_3$ )  $\delta$  ppm 163.2, 149.1, 138.3, 137.6, 135.7, 134.1, 131.3, 127.9, 127.7, 125.7, 121.6, 120.9, 120.4, 77.3, 77.1, 76.7, 39.6, 34.1, 22.6. Minor diastereomer  $^1\text{H}$  NMR (400 MHz,  $\text{CDCl}_3$ )  $\delta$  ppm 8.44 – 8.32 (m, 1H), 7.47 – 7.40 (m, 2H), 7.35 – 7.27 (m, 3H), 7.07 – 7.00 (m, 3H), 6.98 – 6.90 (m, 3H), 6.88 – 6.83 (m, 1H), 2.95 (t,  $J = 7.9$  Hz, 1H), 2.51 (t,  $J = 6.1$  Hz, 1H), 1.70 (dd,  $J = 9.0, 5.3$  Hz, 1H).  $^{13}\text{C}$  NMR (101 MHz,  $\text{CDCl}_3$ )  $\delta$  ppm 158.8, 148.7, 144.3, 137.7, 135.6, 132.5, 131.5, 130.4, 128.1, 127.7, 125.8, 125.6, 121.1, 120.3, 77.3, 77.0, 76.6, 40.5, 32.1, 18.9. HRMS (EI+) calcd. for  $\text{C}_{20}\text{H}_{16}\text{BrN}$   $[\text{M}+\text{H}]^+$ : 350.0544, found: 350.0528.

2-(2-Phenyl-1-(4-(trifluoromethyl)phenyl)cyclopropyl)pyridine **11ha**

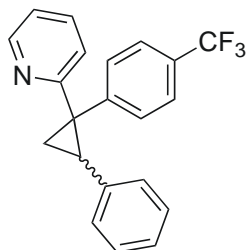

**11ha** was prepared according to the general procedure **C** in 80% yield, dr 1.1:1, (55 mg, 0.162 mmol) from 0.2 mmol of **1c**. Colorless liquid.  $R_f$  (hexanes/EtOAc = 4/1): 0.2.  $^1\text{H}$  NMR (500 MHz,  $\text{CDCl}_3$ )  $\delta$  ppm 8.63 – 8.56 (m, 1H), 8.44 (d,  $J$  = 4.0 Hz, 1H), 7.56 – 7.50 (m, 4H), 7.44 – 7.40 (m, 4H), 7.35 – 7.33 (m, 1H), 7.25 – 7.20 (m, 3H), 7.09 – 7.00 (m, 8H), 6.98 – 6.94 (m, 3H), 6.91 (d,  $J$  = 7.8 Hz, 1H), 6.84 – 6.82 (m, 2H), 6.71 – 6.64 (m, 1H), 3.38 (t,  $J$  = 7.9 Hz, 1H), 3.02 (t,  $J$  = 7.8 Hz, 1H), 2.56 (t,  $J$  = 6.0 Hz, 1H), 2.34 – 2.23 (m, 1H), 2.01 (t,  $J$  = 5.6 Hz, 1H), 1.81 – 1.73 (m, 1H).  $^{13}\text{C}$  NMR (126 MHz,  $\text{CDCl}_3$ )  $\delta$  ppm 162.8, 158.5, 149.2, 148.8, 142.8, 138.0, 137.5, 135.8, 135.7, 132.7, 128.7, 128.1, 127.8, 127.7, 125.9, 125.8, 125.8, 125.4, 125.1, 121.6, 121.3, 120.6, 40.6, 39.9, 34.1, 32.4, 22.4, 19.3. HRMS (EI+) calcd. for  $\text{C}_{21}\text{H}_{16}\text{NF}_3$   $[\text{M}+\text{H}]^+$ : 340.1313, found: 340.1306.

2-(2-Phenyl-1-(thiophen-3-yl)cyclopropyl)pyridine **11ia**

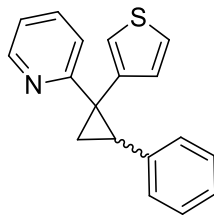

**11ia** was prepared according to the general procedure **C** in 38% yield, dr 2.5:1, (21.0 mg, 0.075 mmol) from 0.2 mmol of **1i**. Colorless liquid.  $R_f$  (hexanes/EtOAc = 4/1): 0.2. Major diastereomer  $^1\text{H}$  NMR (500 MHz,  $\text{CDCl}_3$ )  $\delta$  ppm 8.47 – 8.41 (m, 1H), 7.38 – 7.36 (m, 1H), 7.28 – 7.25 (m, 1H), 7.08 – 6.95 (m, 6H), 6.90 – 6.88 (m, 2H), 2.97 – 2.90 (m, 1H), 2.49 – 2.44 (m, 1H), 1.76 (dd,  $J$  = 8.8, 5.5 Hz, 1H).  $^{13}\text{C}$  NMR  $\delta$  ppm (126 MHz,  $\text{CDCl}_3$ )  $\delta$  158.9, 148.7, 146.7, 137.9, 135.6, 127.9, 127.6, 127.0, 126.1, 125.7, 121.3, 120.6, 77.2, 77.0, 76.7, 37.2, 33.2, 19.7. Minor diastereomer  $^1\text{H}$  NMR (500 MHz,  $\text{CDCl}_3$ )  $\delta$  ppm 8.60 – 8.53 (m, 1H), 7.46 – 7.44 (m, 1H), 7.09 – 7.00 (m, 5H),

6.96 (s, 1H), 6.89 – 6.80 (m, 3H), 6.71 – 6.64 (m, 1H), 3.27 (t,  $J = 7.9$  Hz, 1H), 2.21 – 2.19 (m, 1H), 1.98 – 1.96 (m, 1H).  $^{13}\text{C}$  NMR (126 MHz,  $\text{CDCl}_3$ )  $\delta$  ppm 163.3, 149.0, 139.5, 138.6, 135.7, 130.5, 127.8, 127.5, 125.6, 125.0, 121.6, 120.4, 77.2, 77.0, 76.7, 35.2, 34.1, 23.0. HRMS (EI+) calcd. for  $\text{C}_{18}\text{H}_{15}\text{NS}$   $[\text{M}+\text{H}]^+$ : 278.1003, found: 278.0993.

2-(1-(Naphthalen-1-yl)-2-phenylcyclopropyl)pyridine **11na**

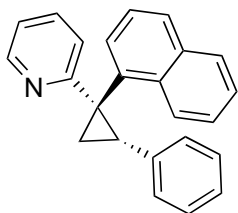

**11na** was prepared according to the general procedure **C** in 75% yield, dr >20:1, (48.0 mg, 0.149 mmol) from 0.2 mmol of **1n**. Colorless liquid.  $R_f$  (hexanes/EtOAc = 4/1): 0.3. Major diastereomer  $^1\text{H}$  NMR (500 MHz,  $\text{CDCl}_3$ )  $\delta$  ppm 8.48 (d,  $J = 7.5$  Hz, 1H), 8.43 – 8.36 (m, 1H), 7.98 (d,  $J = 6.7$  Hz, 1H), 7.86 – 7.79 (m, 2H), 7.59 – 7.57 (m, 1H), 7.51 – 7.45 (m, 2H), 7.23 – 7.21 (m, 2H), 7.19 – 7.10 (m, 3H), 6.98 (d,  $J = 7.3$  Hz, 1H), 6.86 – 6.71 (m, 2H), 3.24 (t,  $J = 7.7$  Hz, 1H), 3.11 (d,  $J = 4.9$  Hz, 1H), 1.69 (dd,  $J = 6.8, 5.1$  Hz, 1H).  $^{13}\text{C}$  NMR (126 MHz,  $\text{CDCl}_3$ )  $\delta$  ppm 159.3, 149.1, 148.1, 141.5, 137.9, 135.7, 135.4, 134.1, 132.8, 128.8, 128.5, 127.9, 127.9, 127.6, 126.1, 125.8, 125.7, 125.5, 125.1, 120.6, 120.3, 77.3, 77.0, 76.8, 39.3, 32.7, 18.1. HRMS (EI+) calcd. for  $\text{C}_{24}\text{H}_{19}\text{N}$   $[\text{M}+\text{H}]^+$ : 322.1596, found: 322.1582.

2-(1,2-Diphenylcyclopropyl)quinoline **11ma**

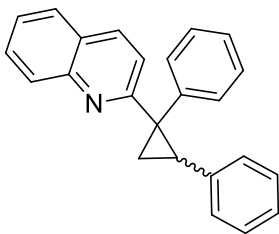

**11ma** was prepared according to the general procedure **C** in 31% yield, dr 1.7:1, (20.0 mg, 0.062 mmol) from 0.2 mmol of **1m**. Colorless liquid.  $R_f$  (hexanes/EtOAc = 4/1): 0.2.  $^1\text{H}$  NMR (500 MHz,  $\text{CDCl}_3$ )  $\delta$  ppm 8.10 – 8.07 (m, 1H), 7.86 (d,  $J = 8.6$  Hz, 1H), 7.68 – 7.60 (m, 3H), 7.46 – 7.40 (m, 3H), 7.35 – 7.31 (m, 1H), 7.22 – 7.18 (m, 5H), 7.13 – 6.92 (m, 7H), 6.89 – 6.87 (m, 2H),

3.58 (t,  $J = 7.8$  Hz, 1H), 3.13 (t,  $J = 7.8$  Hz, 1H), 2.87 (t,  $J = 5.6$  Hz, 1H), 2.43 (dd,  $J = 8.5, 3.8$  Hz, 1H), 2.12 – 2.04 (m, 1H), 1.80 (dd,  $J = 8.1, 5.1$  Hz, 1H).  $^{13}\text{C}$  NMR (126 MHz,  $\text{CDCl}_3$ )  $\delta$  ppm 163.8, 159.5, 147.8, 138.9, 138.5, 137.8, 135.4, 135.4, 132.5, 129.3, 129.2, 129.1, 128.9, 128.6, 128.5, 128.2, 128.1, 127.6, 127.5, 127.4, 127.3, 126.8, 126.6, 126.4, 125.9, 125.7, 125.5, 125.5, 123.9, 120.5, 77.3, 77.0, 76.7, 41.9, 41.0, 34.7, 32.3, 23.3, 19.4. HRMS (EI<sup>+</sup>) calcd. for  $\text{C}_{24}\text{H}_{19}\text{N}$   $[\text{M}+\text{H}]^+$ : 322.1596, found: 322.1583.

#### 2-Chloro-6-(1,2-diphenylcyclopropyl)pyridine **11oa**

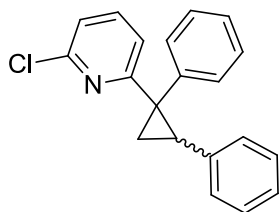

**11oa** was prepared according to the general procedure **C** in 95% yield, dr 1.2:1, (58.0 mg, 0.190 mmol) from 0.2 mmol of **1o**. Colorless liquid.  $R_f$  (hexanes/EtOAc = 4/1): 0.2.  $^1\text{H}$  NMR (500 MHz,  $\text{CDCl}_3$ )  $\delta$  ppm 7.51 (d,  $J = 7.9$  Hz, 2H), 7.42 – 7.25 (m, 5H), 7.23 – 7.20 (m, 4H), 7.18 – 7.13 (m, 2H), 7.13 – 6.99 (m, 9H), 6.93 (d,  $J = 7.8$  Hz, 1H), 6.87 – 6.76 (m, 3H), 6.66 (d,  $J = 7.7$  Hz, 1H), 3.34 (dd,  $J = 9.0, 7.0$  Hz, 1H), 3.07 (t,  $J = 8.0$  Hz, 1H), 2.69 (dd,  $J = 7.0, 5.3$  Hz, 1H), 2.30 (dd,  $J = 9.1, 4.6$  Hz, 1H), 2.03 (dd,  $J = 6.9, 4.6$  Hz, 1H), 1.73 (dd,  $J = 9.0, 5.3$  Hz, 1H).  $^{13}\text{C}$  NMR (126 MHz,  $\text{CDCl}_3$ )  $\delta$  ppm 165.3, 160.7, 150.8, 149.8, 144.5, 138.4, 138.2, 138.0, 137.6, 137.3, 135.9, 135.7, 132.5, 129.3, 129.0, 128.9, 128.6, 128.6, 128.3, 128.1, 128.0, 127.7, 127.6, 127.3, 127.2, 127.0, 126.8, 126.7, 126.5, 125.9, 125.7, 125.5, 124.0, 121.1, 120.6, 120.2, 77.3, 77.1, 76.8, 40.4, 40.0, 34.9, 32.8, 23.3, 18.9. HRMS (EI<sup>+</sup>) calcd. for  $\text{C}_{20}\text{H}_{16}\text{ClN}$   $[\text{M}+\text{H}]^+$ : 306.1050, found: 306.1037.

#### 2-(2-(3-Methoxyphenyl)-1-phenylcyclopropyl)pyridine **11ab**

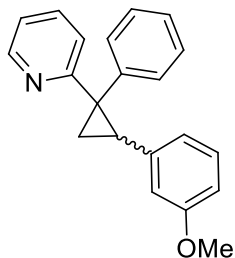

**11ab** was prepared according to the general procedure **C** in 96% yield, dr 1.1:1, (58.0 mg, 0.191 mmol) from 0.20 mmol of **1a**. Colorless liquid.  $R_f$  (hexanes/EtOAc = 3/1): 0.3. Major diastereomer  $^1\text{H}$  NMR (500 MHz,  $\text{CDCl}_3$ )  $\delta$  ppm 8.58 (d,  $J$  = 3.9 Hz, 1H), 7.40 – 7.35 (m, 1H), 7.27 – 7.11 (m, 5H), 7.06 – 6.95 (m, 2H), 6.78 (d,  $J$  = 8.0 Hz, 1H), 6.63 – 6.56 (m, 1H), 6.49 (d,  $J$  = 7.5 Hz, 1H), 3.57 (s, 3H), 3.30 (dd,  $J$  = 8.8, 7.0 Hz, 1H), 2.24 (dd,  $J$  = 9.0, 4.6 Hz, 1H), 1.96 (dd,  $J$  = 6.7, 4.6 Hz, 1H).  $^{13}\text{C}$  NMR (126 MHz,  $\text{CDCl}_3$ )  $\delta$  ppm 163.8, 158.9, 149.1, 140.6, 138.3, 135.6, 132.4, 128.4, 128.3, 126.8, 121.9, 120.7, 120.3, 113.0, 111.7, 77.3, 77.0, 76.8, 54.9, 40.3, 34.2, 23.3. Minor diastereomer  $^1\text{H}$  NMR (500 MHz,  $\text{CDCl}_3$ )  $\delta$  ppm 8.46 – 8.41 (m, 1H), 7.51 – 7.42 (m, 2H), 7.33 – 7.28 (m, 3H), 7.24 – 7.20 (m, 1H), 7.02 – 7.00 (m, 1H), 6.97 – 6.92 (m, 2H), 6.65 – 6.54 (m, 2H), 6.46 (d,  $J$  = 1.7 Hz, 1H), 3.64 (s, 3H), 2.97 (dd,  $J$  = 8.8, 6.9 Hz, 1H), 2.50 (dd,  $J$  = 6.7, 5.4 Hz, 1H), 1.74 (dd,  $J$  = 8.9, 5.3 Hz, 1H).  $^{13}\text{C}$  NMR (126 MHz,  $\text{CDCl}_3$ )  $\delta$  ppm 159.4, 159.1, 148.6, 145.3, 139.9, 135.6, 128.6, 128.5, 128.5, 126.5, 126.0, 121.0, 120.8, 113.2, 111.6, 77.2, 77.0, 76.8, 55.0, 41.1, 32.0, 19.2. HRMS (EI<sup>+</sup>) calcd. for  $\text{C}_{21}\text{H}_{19}\text{NO}$   $[\text{M}+\text{H}]^+$ : 302.1545, found: 302.1531.

#### 2-(2-Methyl-1,2-diphenylcyclopropyl)pyridine **11ac**

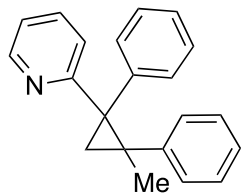

**11ac** was prepared according to the general procedure **C** in 96% yield, dr 1.6:1, (58.0 mg, 0.191 mmol) from 0.20 mmol of **1a**. Colorless liquid.  $R_f$  (hexanes/EtOAc = 4/1): 0.3.  $^1\text{H}$  NMR (500 MHz,  $\text{CDCl}_3$ )  $\delta$  ppm 8.67 (d,  $J$  = 5.0 Hz, 1H), 8.22 (d,  $J$  = 5.0 Hz, 1H), 7.68 – 7.63 (m, 2H), 7.60 – 7.55 (m, 1H), 7.49 (d,  $J$  = 7.8 Hz, 1H), 7.42 – 7.38 (m, 2H), 7.32 – 7.30 (m, 1H), 7.28 – 7.19 (m, 8H), 7.19 – 7.00 (m, 11H), 6.99 – 6.93 (m, 1H), 6.78 – 6.72 (m, 1H), 2.81 (d,  $J$  = 4.8 Hz, 1H), 2.27 (d,  $J$  = 5.4 Hz, 1H), 1.96 (d,  $J$  = 5.4 Hz, 1H), 1.56 (d,  $J$  = 4.9 Hz, 1H), 1.40 (s, 3H), 1.39 (s, 3H).  $^{13}\text{C}$  NMR (126 MHz,  $\text{CDCl}_3$ )  $\delta$  ppm 162.0, 160.8, 149.1, 148.1, 143.2, 142.8, 141.9, 141.5, 136.1, 135.2, 131.3, 130.4, 128.8, 128.3, 128.2, 127.6, 127.6, 127.5, 126.6, 125.8, 125.6, 125.4, 124.8, 123.9, 121.3, 120.1, 77.3, 77.1, 76.8, 44.4, 43.8, 34.7, 32.8, 26.7, 24.5, 24.2, 23.6. HRMS (EI<sup>+</sup>) calcd. for  $\text{C}_{21}\text{H}_{19}\text{N}$   $[\text{M}+\text{H}]^+$ : 286.1596, found: 286.1586.

2-(2-(4-Chlorophenyl)-1-phenylcyclopropyl)pyridine **11ad**

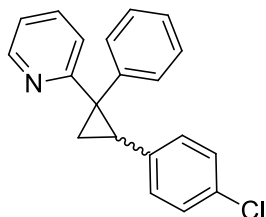

**11ad** was prepared according to the general procedure **C** in 99% yield, dr 1.5:1, (61.0 mg, 0.195 mmol) from 0.20 mmol of **1a**. Colorless liquid.  $R_f$  (hexanes/EtOAc = 4/1): 0.3.  $^1\text{H}$  NMR (500 MHz,  $\text{CDCl}_3$ )  $\delta$  ppm 8.58 (d,  $J = 4.0$  Hz, 1H), 8.41 (d,  $J = 4.2$  Hz, 1H), 7.46 – 7.40 (m, 2H), 7.36 – 7.30 (m, 4H), 7.29 – 7.18 (m, 5H), 7.16 – 7.09 (m, 3H), 7.05 – 7.00 (m, 5H), 6.93 – 6.89 (m, 4H), 6.75 – 6.70 (m, 3H), 3.36 – 3.30 (m, 1H), 3.01 – 2.94 (m, 1H), 2.54 (t,  $J = 5.9$  Hz, 1H), 2.24 (dd,  $J = 8.8, 4.5$  Hz, 1H), 1.97 – 1.91 (m, 1H), 1.74 (dd,  $J = 8.8, 5.2$  Hz, 1H).  $^{13}\text{C}$  NMR (126 MHz,  $\text{CDCl}_3$ )  $\delta$  ppm 163.5, 159.1, 149.0, 148.6, 145.0, 137.9, 137.6, 136.8, 135.7, 132.4, 131.4, 131.2, 129.6, 129.1, 128.9, 128.8, 128.7, 128.6, 128.5, 128.7, 127.4, 127.7, 127.6, 127.2, 126.8, 126.6, 125.7, 121.8, 121.1, 120.4, 77.3, 77.0, 76.8, 41.0, 40.9, 33.4, 31.5, 23.1, 19.1. HRMS (EI<sup>+</sup>) calcd. for  $\text{C}_{20}\text{H}_{16}\text{ClN}$   $[\text{M}+\text{H}]^+$ : 306.1050, found: 306.1037.

2-(1-Phenyl-2-(o-tolyl)cyclopropyl)pyridine **11ae**

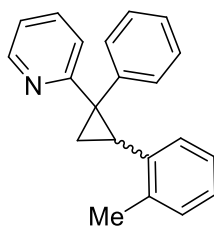

**11ae** was prepared according to the general procedure **C** in 84% yield, dr 1.1:1, (48.0 mg, 0.168 mmol) from 0.20 mmol of **1a**. Colorless liquid.  $R_f$  (hexanes/EtOAc = 4/1): 0.3.  $^1\text{H}$  NMR (500 MHz,  $\text{CDCl}_3$ )  $\delta$  ppm 8.64 – 8.57 (m, 1H), 8.37 – 8.31 (m, 1H), 7.57 – 7.49 (m, 2H), 7.42 – 7.38 (m, 1H), 7.37 – 7.33 (m, 2H), 7.28 – 7.24 (m, 2H), 7.18 – 7.10 (m, 4H), 7.07 – 7.02 (m, 4H), 7.01 – 6.95 (m, 2H), 6.95 – 6.78 (m, 6H), 6.52 (d,  $J = 7.7$  Hz, 1H), 3.50 – 3.40 (m, 1H), 3.07 (dd,  $J = 8.6, 7.3$  Hz, 1H), 2.73 (dd,  $J = 6.8, 5.1$  Hz, 1H), 2.52 (s, 3H), 2.44 (s, 3H), 2.18 (dd,  $J = 7.1, 4.6$  Hz, 1H), 2.14 (dd,  $J = 8.9, 4.5$  Hz, 1H), 1.66 (dd,  $J = 8.9, 5.0$  Hz, 1H).  $^{13}\text{C}$  NMR (126 MHz,  $\text{CDCl}_3$ )

$\delta$  ppm 164.1, 159.7, 149.1, 148.3, 145.3, 138.8, 137.7, 136.8, 135.9, 135.6, 135.3, 131.7, 130.2, 129.4, 129.3, 128.6, 128.5, 128.0, 127.5, 126.6, 126.4, 125.9, 125.6, 125.1, 125.1, 124.8, 121.7, 120.7, 120.2, 77.3, 77.1, 76.8, 39.9, 39.4, 31.7, 30.0, 21.1, 20.7, 20.3, 18.6. HRMS (EI<sup>+</sup>) calcd. for C<sub>21</sub>H<sub>19</sub>N [M+H]<sup>+</sup>: 286.1572, found: 286.1582.

2-(1-Phenyl-2-(*o*-tolyl)cyclopropyl)pyridine **11af**

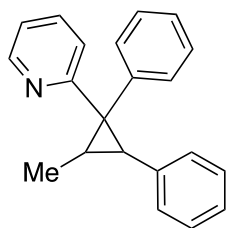

**11af** was prepared according to the general procedure **C** in 35% yield, dr 5:1, (20.0 mg, 0.070 mmol) from 0.20 mmol of **1a**. Colorless liquid. *R<sub>f</sub>* (hexanes/EtOAc = 4/1): 0.3. <sup>1</sup>H NMR (500 MHz, CDCl<sub>3</sub>)  $\delta$  ppm 8.64 – 8.57 (m, 1H), 8.37 – 8.31 (m, 1H), 7.57 – 7.49 (m, 2H), 7.42 – 7.38 (m, 1H), 7.37 – 7.34 (m, 2H), 7.29 – 7.25 (m, 2H), 7.18 – 7.10 (m, 4H), 7.06 – 7.02 (m, 4H), 7.01 – 6.95 (m, 2H), 6.95 – 6.78 (m, 6H), 6.52 (d, *J* = 7.7 Hz, 1H), 3.50 – 3.40 (m, 1H), 3.07 (dd, *J* = 8.6, 7.3 Hz, 1H), 2.73 (dd, *J* = 6.8, 5.1 Hz, 1H), 2.52 (s, 3H), 2.44 (s, 3H), 2.18 (dd, *J* = 7.1, 4.6 Hz, 1H), 2.14 (dd, *J* = 8.9, 4.5 Hz, 1H), 1.66 (dd, *J* = 8.9, 5.0 Hz, 1H). <sup>13</sup>C NMR (126 MHz, CDCl<sub>3</sub>)  $\delta$  ppm 160.7, 148.4, 148.1, 141.8, 138.6, 135.8, 135.5, 131.2, 130.5, 128.4, 128.1, 128.0, 127.6, 127.5, 126.6, 126.3, 126.1, 126.1, 125.4, 125.3, 121.3, 120.8, 120.7, 77.3, 77.1, 76.8, 46.4, 37.6, 35.2, 26.1, 22.4, 15.4, 13.8. HRMS (EI<sup>+</sup>) calcd. for C<sub>21</sub>H<sub>19</sub>N [M+H]<sup>+</sup>: 286.1596, found: 286.1585.

2,2'-(1-Phenylcyclopropane-1,2-diyl)dipyridine **11ag**

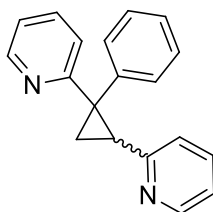

**11ag** was prepared according to the general procedure **C** in 97% yield, dr 1.8:1, (53.0 mg, 0.194 mmol) from 0.20 mmol of **1a**. Colorless liquid. *R<sub>f</sub>* (hexanes/EtOAc = 3/1): 0.2. Major diastereomer <sup>1</sup>H NMR (500 MHz, CDCl<sub>3</sub>)  $\delta$  ppm 8.59 – 8.51 (m, 1H), 8.27 – 8.23 (m, 1H), 7.41 – 7.32 (m, 2H),

7.17 – 7.06 (m, 5H), 7.02 – 6.95 (m, 1H), 6.92 – 6.87 (m, 1H), 6.86 (d,  $J = 7.9$  Hz, 1H), 6.78 – 6.73 (m, 1H), 3.54 (dd,  $J = 8.6, 6.8$  Hz, 1H), 2.36 – 2.34 (m, 1H), 2.24 – 2.21 (m, 1H).  $^{13}\text{C}$  NMR (126 MHz,  $\text{CDCl}_3$ )  $\delta$  ppm 163.4, 158.3, 148.9, 148.5, 138.4, 135.6, 135.2, 132.1, 128.5, 126.6, 122.7, 121.9, 120.4, 120.4, 77.3, 77.0, 76.7, 40.8, 35.6, 21.7. Minor diastereomer  $^1\text{H}$  NMR (500 MHz,  $\text{CDCl}_3$ )  $\delta$  ppm 8.36 (d,  $J = 3.4$  Hz, 1H), 8.28 (d,  $J = 3.6$  Hz, 1H), 7.48 – 7.42 (m, 2H), 7.36 – 7.30 (m, 1H), 7.34 – 7.26 (m, 3H), 7.21 – 7.17 (m, 1H), 7.01 (d,  $J = 7.8$  Hz, 1H), 6.96 – 6.90 (m, 1H), 6.91 – 6.87 (m, 2H), 3.20 – 3.12 (m, 1H), 2.72 – 2.66 (m, 1H), 1.80 (dd,  $J = 8.6, 5.1$  Hz, 1H).  $^{13}\text{C}$  NMR (126 MHz,  $\text{CDCl}_3$ )  $\delta$  ppm 159.4, 158.1, 148.5, 148.5, 144.8, 135.6, 135.6, 128.5, 128.3, 126.5, 125.8, 122.6, 120.9, 120.5, 77.2, 77.0, 76.7, 41.1, 33.6, 19.1. HRMS (EI<sup>+</sup>) calcd. for  $\text{C}_{19}\text{H}_{16}\text{N}_2$   $[\text{M}+\text{H}]^+$ : 273.1392, found: 273.1380.

#### 2-(2-Ethoxy-1-phenylcyclopropyl)pyridine **11ah**

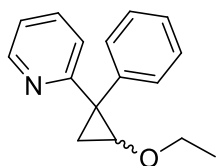

**11ah** was prepared according to the general procedure **C** in 42% yield, dr 1.1:1, (20.0 mg, 0.083 mmol) from 0.20 mmol of **1a**. Colorless liquid.  $R_f$  (hexanes/EtOAc = 3/1): 0.2. Major diastereomer  $^1\text{H}$  NMR (500 MHz,  $\text{CDCl}_3$ )  $\delta$  ppm 8.52 – 8.45 (m, 1H), 7.39 – 7.34 (m, 5H), 7.31 – 7.26 (m, 1H), 7.04 – 6.97 (m, 1H), 6.82 (d,  $J = 8.0$  Hz, 1H), 4.12 (dd,  $J = 6.7, 4.1$  Hz, 1H), 3.63 (q,  $J = 7.0$  Hz, 2H), 1.80 (dd,  $J = 6.6, 5.4$  Hz, 1H), 1.65 – 1.62 (m, 1H), 1.08 (t,  $J = 7.0$  Hz, 3H).  $^{13}\text{C}$  NMR (126 MHz,  $\text{CDCl}_3$ )  $\delta$  ppm 163.5, 148.8, 138.4, 135.6, 131.6, 128.2, 126.8, 122.0, 120.2, 77.2, 77.0, 76.7, 66.2, 65.1, 37.0, 23.0, 15.0. Minor diastereomer  $^1\text{H}$  NMR (500 MHz,  $\text{CDCl}_3$ )  $\delta$  ppm 8.57 (d,  $J = 4.0$ , 1H), 7.52 – 7.47 (m, 1H), 7.37 – 7.33 (m, 2H), 7.32 – 7.28 (m, 2H), 7.25 – 7.19 (m, 2H), 7.08 – 7.00 (m, 1H), 3.89 (dd,  $J = 7.0, 4.2$  Hz, 1H), 3.58 (dt,  $J = 14.1, 7.0$  Hz, 1H), 3.47 – 3.40 (m, 1H), 2.29 (dd,  $J = 5.9, 4.2$  Hz, 1H), 1.41 (dd,  $J = 6.9, 6.1$  Hz, 1H), 0.98 (t,  $J = 7.0$  Hz, 3H).  $^{13}\text{C}$  NMR (126 MHz,  $\text{CDCl}_3$ )  $\delta$  ppm 159.3, 148.5, 143.4, 135.6, 129.6, 128.6, 126.6, 124.4, 120.8, 77.2, 77.0, 76.7, 66.3, 64.5, 38.5, 19.9, 14.8. HRMS (EI<sup>+</sup>) calcd. for  $\text{C}_{16}\text{H}_{17}\text{NO}$   $[\text{M}+\text{H}]^+$ : 240.1388, found: 240.1381.

### 2-Phenyl-2-(pyridin-2-yl)cyclopropanecarbonitrile **11ai**

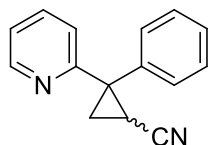

**11ai** was prepared according to the general procedure **C** in 68% yield, dr 1.5:1, (30.0 mg, 0.136 mmol) from 0.2 mmol of **1a**. Colorless semi-solid.  $R_f$  (hexanes/EtOAc = 4/1): 0.3.  $^1\text{H}$  NMR (400 MHz,  $\text{CDCl}_3$ ) (NMR reported only for major diastereomer)  $\delta$  ppm 8.48 (d,  $J$  = 3.9 Hz, 1H), 7.50 – 7.46 (m, 4H), 7.46 – 7.36 (m, 2H), 7.11 – 7.08 (m, 1H), 6.78 (d,  $J$  = 8.0 Hz, 1H), 2.89 – 2.85 (m, 1H), 2.10 (dd,  $J$  = 9.2, 4.3 Hz, 1H), 1.94 (dd,  $J$  = 6.0, 4.3 Hz, 1H).  $^{13}\text{C}$  NMR (101 MHz,  $\text{CDCl}_3$ )  $\delta$  ppm 159.7, 149.2, 136.8, 136.3, 131.3, 129.2, 128.6, 122.5, 121.7, 119.8, 38.0, 23.4, 13.8. HRMS (EI+) calcd. for  $\text{C}_{15}\text{H}_{13}\text{N}_2$   $[\text{M}+\text{H}]^+$ : 221.1079, found: 221.1072.

### 1-(2-Phenyl-2-(pyridin-2-yl)cyclopropyl)ethanone **11aj**

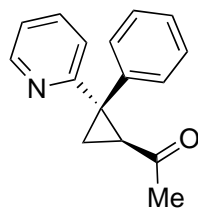

**11aj** was prepared according to the general procedure **C** in 70% yield, dr 4:1, (33.3 mg, 0.14 mmol) from 0.2 mmol of **1a**. Colorless liquid.  $R_f$  (hexanes/EtOAc = 7/3): 0.32.  $^1\text{H}$  NMR (500 MHz,  $\text{CDCl}_3$ ) (NMR reported only for major diastereomer)  $\delta$  ppm 8.52 (d,  $J$  = 4.6 Hz, 1H), 7.44 – 7.41 (m, 1H), 7.37 – 7.35 (m, 2H), 7.31 – 7.30 (m, 1H), 7.28 – 7.26 (m, 2H), 7.08 – 7.06 (m, 1H), 6.77 – 6.76 (m, 1H), 3.40 – 3.37 (m, 1H), 2.26 – 2.24 (m, 1H), 2.18 (s, 3H), 1.89 (dd,  $J$  = 7.9, 3.8 Hz, 1H).  $^{13}\text{C}$  NMR (126 MHz,  $\text{CDCl}_3$ )  $\delta$  ppm 204.3, 162.1, 149.1, 137.8, 136.0, 131.2, 128.7, 127.6, 122.7, 121.1, 43.0, 38.3, 31.8, 22.9. HRMS (EI+) calcd. for  $\text{C}_{16}\text{H}_{16}\text{NO}$   $[\text{M}+\text{H}]^+$ : 238.1232, found: 238.1227.

Ethyl 2-phenyl-2-(pyridin-2-yl)cyclopropanecarboxylate **11ak**

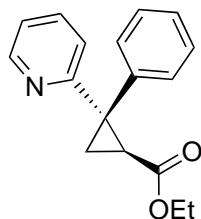

**11ak** was prepared according to the general procedure **C** in 90% yield, dr 9:1, (48.3 mg, 0.181 mmol) from 0.2 mmol of **1a**. Colorless semi-solid.  $R_f$  (hexanes/EtOAc = 7/3): 0.32.  $^1\text{H}$  NMR (400 MHz,  $\text{CDCl}_3$ ) (NMR reported only for major diastereomer)  $\delta$  ppm 8.53 – 8.48 (m, 1H), 7.41 – 7.38 (m, 1H), 7.36 – 7.34 (m, 4H), 7.33 – 7.29 (m, 1H), 7.06 – 7.02 (m, 1H), 6.78 (d,  $J$  = 8.0 Hz, 1H), 3.98 – 3.83 (m, 2H), 3.06 – 3.02 (dd,  $J$  = 8.1, 6.3 Hz, 1H), 2.15 (dd,  $J$  = 6.2, 4.0 Hz, 1H), 1.95 (dd,  $J$  = 8.2, 4.0 Hz, 1H), 1.00 (t,  $J$  = 7.1 Hz, 3H).  $^{13}\text{C}$  NMR (101 MHz,  $\text{CDCl}_3$ )  $\delta$  ppm 170.7, 162.0, 149.1, 138.5, 135.9, 131.1, 128.6, 127.6, 122.5, 121.0, 60.4, 39.9, 31.0, 21.9, 14.1. HRMS (EI<sup>+</sup>) calcd. for  $\text{C}_{17}\text{H}_{18}\text{NO}_2$   $[\text{M}+\text{H}]^+$ : 268.1338, found: 268.1335.

1-Phenyl-1-(pyridin-2-yl)-1,6b-dihydrocyclopropa[b]indol-2(1aH)-yl)ethanone **11al**

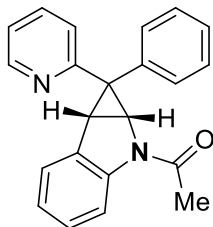

**11al** was prepared according to the general procedure **C** in 30% yield, dr 1:1, (19.6 mg, 0.06 mmol) from 0.2 mmol of **1a**. Colorless liquid.  $R_f$  (hexanes/EtOAc = 7/3): 0.3.  $^1\text{H}$  NMR (400 MHz,  $\text{CDCl}_3$ ) (NMR reported only for major diastereomer)  $\delta$  ppm 8.56 (d,  $J$  = 4.3 Hz, 1H), 7.80 (d,  $J$  = 7.4 Hz, 1H), 7.40 – 7.36 (m, 3H), 7.15 – 7.11 (m, 2H), 7.09 – 7.06 (m, 1H), 7.02 – 6.99 (m, 2H), 6.96 – 6.60 (m, 2H), 6.67 (d,  $J$  = 8.0 Hz, 1H), 4.95 (d,  $J$  = 6.9 Hz, 1H), 3.79 (d,  $J$  = 6.8 Hz, 1H), 2.50 (s, 3H).  $^{13}\text{C}$  NMR (126 MHz,  $\text{CDCl}_3$ )  $\delta$  ppm 169.2, 162.4, 149.2, 143.3, 135.8, 133.1, 132.4, 131.6, 128.5, 127.4, 127.4, 125.0, 123.5, 122.3, 120.7, 116.9, 52.9, 37.8, 35.3, 24.7. HRMS (EI<sup>+</sup>) calcd. for  $\text{C}_{22}\text{H}_{19}\text{N}_2\text{O}$   $[\text{M}+\text{H}]^+$ : 327.1497, found: 327.1487.

## 6. Synthesis of Biologically Active Molecules

### Synthesis of 4,4'-(pyridin-2-ylmethylene)diphenol **12**

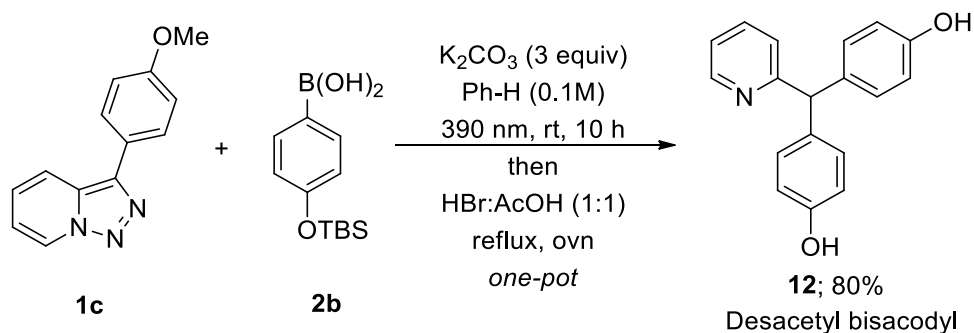

An oven dried 3 mL Wheaton V-vial containing a stirring bar was charged with Pyridotriazoles **1c** (45 mg, 0.2 mmol, 1 equiv),  $K_2CO_3$  (83 mg, 0.6 mmol, 3 equiv) and TBS protected aryl boronic acid **2b** (76 mg, 0.3 mmol, 1.5 equiv) in dry and degassed benzene (2 mL) under argon atmosphere (outside glovebox). After the reaction vessel was capped with a pressure screw cap in the glove box. The vial was irradiated with 40 W Kessil LED PR160-390 nm for 10 h (monitored by GC/MS), with cooling from a fan (vial temperature reached 37 °C). The vial distance from the lamp was about 2-3 cm. The resulting mixture was passed through a short pad of Celite, and concentrated under a reduced pressure. To the crude reaction mixture HBr (1.5 mL), AcOH (1.5 mL) were added and the reaction mixture was refluxed for overnight (monitored by TLC) complete conversion of the starting material. The cooled reaction mixture was diluted with  $H_2O$  (5 mL) and neutralized using a 10 M NaOH(aq) solution, extracted with EtOAc (5 mL) combined organic layers were dried over  $MgSO_4$ , filtered, and the solvent removed in vacuo and purified by column chromatography in hexanes/EtOAc to afford the *corresponding desacetyl biscodyl* **12** in 81% yield (50.0 mg, 0.162 mmol) brownish solid.  $R_f$  (hexanes/EtOAc = 1/2): 0.3.  $^1H$  NMR (500 MHz,  $MeOD_4$ ):  $\delta$  ppm 8.44 (d,  $J$  = 4.4 Hz, 1H), 7.75 – 7.72 (m, 1H), 7.26 – 7.22 (m, 1H), 7.14 – 7.12 (m, 1H), 6.91 – 6.89 (m, 4H), 6.72 – 6.70 (m, 4H), 5.51 (s, 1H).  $^{13}C$  NMR (126 MHz,  $MeOD_4$ ):  $\delta$  ppm 165.4, 157.1, 149.5, 138.6, 135.1, 131.3, 125.4, 122.9, 116.1, 58.6. HRMS (EI<sup>+</sup>) calcd. for  $C_{18}H_{15}NO_2$   $[M+H]^+$ : 278.1181, found: 278.1173.

## Synthesis of (pyridin-2-ylmethylene)bis(4,1-phenylene) diacetate **13**

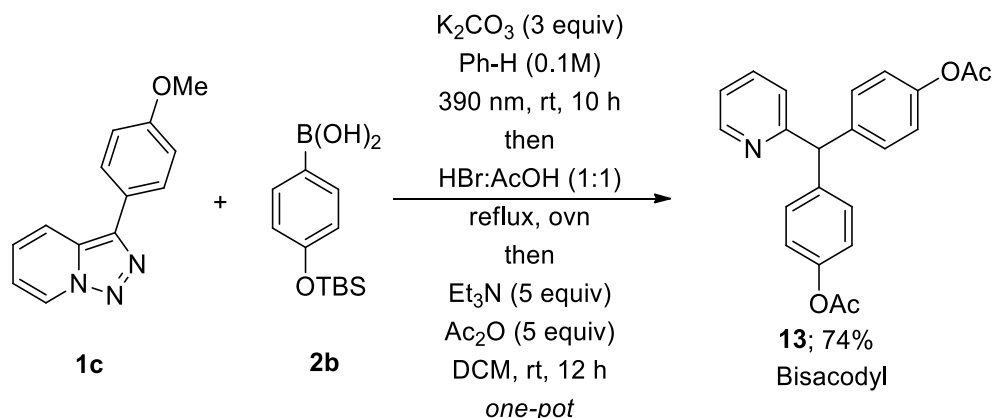

An oven dried 3 mL Wheaton V-vial containing a stirring bar was charged with Pyridotriazoles **1c** (45 mg, 0.2 mmol, 1 equiv),  $\text{K}_2\text{CO}_3$  (83 mg, 0.6 mmol, 3 equiv) and TBS protected aryl boronic acid **2b** (76 mg, 0.3 mmol, 1.5 equiv) in dry and degassed benzene (2 mL) under argon atmosphere (outside glovebox). After the reaction vessel was capped with a pressure screw cap in the glove box. The vial was irradiated with 40 W Kessil LED PR160-390 nm for 10 h (monitored by GC/MS), with cooling from a fan (vial temperature reached 37 °C). The vial distance from the lamp was about 2-3 cm. The resulting mixture was passed through a short pad of Celite, and concentrated under a reduced pressure. To the crude reaction mixture HBr (1.5 mL), AcOH (1.5 mL) were added and the reaction mixture was refluxed for overnight (monitored by TLC) complete conversion of the starting material. The cooled reaction mixture was diluted with  $\text{H}_2\text{O}$  (5 mL) and neutralized using a 10 M NaOH(aq) solution, extracted with EtOAc (5 mL) combined organic layers were dried over  $\text{Na}_2\text{SO}_4$ , filtered, the solvent removed in vacuo. Crude compound was dissolved  $\text{CH}_2\text{Cl}_2$  (4 mL).  $\text{Et}_3\text{N}$  (141  $\mu\text{L}$ , 1 mmol, 5 equiv),  $\text{Ac}_2\text{O}$  (94.5  $\mu\text{L}$ , 1 mmol, 5 equiv) were added to the reaction mixture and stirred at room temperature for 12 h monitored by TLC evaporated the solvent and purified by column chromatography in hexanes/EtOAc to afford the corresponding *Biscodyl* **13** in 74% yield (53.5 mg, 0.148 mmol). Colorless liquid.  $R_f$  (hexanes/EtOAc = 3/1): 0.32.  $^1\text{H}$  NMR (500 MHz,  $\text{CDCl}_3$ ):  $\delta$  ppm 8.59 (d,  $J$  = 4.2 Hz, 1H), 7.63 – 7.59 (m, 1H), 7.18 – 7.16 (m, 4H), 7.15 – 7.14 (m, 1H), 7.11 – 7.09 (m, 1H), 7.02 – 7.00 (m, 4H), 5.65 (s, 1H), 2.28 (s, 6H).  $^{13}\text{C}$  NMR (126 MHz,  $\text{CDCl}_3$ ):  $\delta$  ppm 169.5, 162.7, 149.7, 149.4, 140.1,

136.7, 130.4, 123.9, 121.7, 121.6, 58.2, 21.2. HRMS (EI<sup>+</sup>) calcd. for C<sub>22</sub>H<sub>19</sub>NO<sub>4</sub> [M+H]<sup>+</sup>: 362.1392, found: 362.1386.

### Synthesis of 2-((4-chlorophenyl)(piperidin-4-yloxy)methyl)pyridine **14**

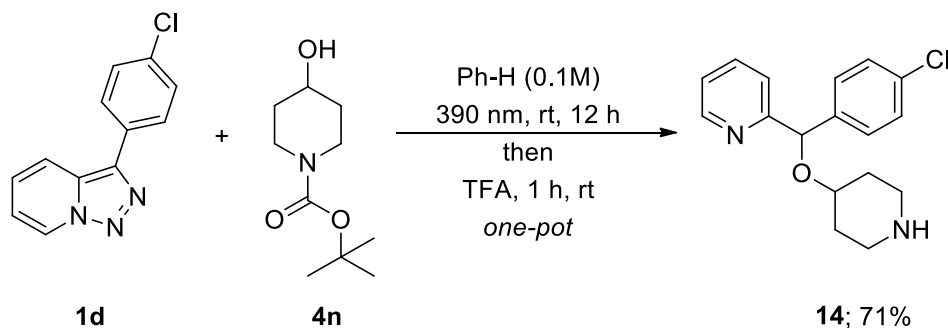

An oven dried 3 mL Wheaton V-vial containing a stirring bar was charged with Pyridotriazoles **1d** (46 mg, 0.2 mmol, 1 equiv), in dry and degassed benzene (2 mL) under argon atmosphere (outside glovebox) and 1-Boc-4-hydroxypiperidine **4n** were added (161 mg 0.8 mmol 4 equiv). After the reaction vessel was capped with a pressure screw cap in the glove box. The vial was irradiated with 40 W Kessil LED PR160-390nm for 12 h (monitored by GC/MS), with cooling from a fan (vial temperature reached 37 °C). The vial distance from the lamp was about 2-3 cm. To the reaction mixture TFA (0.5 mL) was added and stirred for 1 h reaction mixture was diluted with H<sub>2</sub>O (5 mL) and neutralized using a 2 M NaOH(aq) solution, extracted with EtOAc (5 mL) combined organic layers were dried over Na<sub>2</sub>SO<sub>4</sub>, filtered, the solvent removed in vacuo. afford the *title compound* **14** without further purification in 71% yield (43.0 mg, 0.141 mmol). Colorless liquid. <sup>1</sup>H NMR (500 MHz, CDCl<sub>3</sub>): δ ppm 8.50 (d, *J* = 4.7 Hz, 1H), 7.69 – 7.66 (m, 1H), 7.54 (d, *J* = 7.9 Hz, 1H), 7.37 – 7.36 (m, 2H), 7.28 – 7.26 (m, 2H), 7.18 – 7.13 (m, 1H), 5.63 (s, 1H), 3.54 – 3.47 (m, 1H), 3.08 (dd, *J* = 11.4, 6.1 Hz, 2H), 2.61 – 2.54 (m, 2H), 1.98 – 1.86 (m, 2H), 1.59 – 1.52 (m, 2H). <sup>13</sup>C NMR (126 MHz, CDCl<sub>3</sub>): δ ppm 162.2, 149.0, 140.5, 137.0, 133.3, 128.6, 128.3, 122.5, 120.7, 80.8, 74.0, 44.4, 33.2. HRMS (EI<sup>+</sup>) calcd. for C<sub>17</sub>H<sub>19</sub>N<sub>2</sub>OCl [M+H]<sup>+</sup>: 303.1264, found: 303.1260.

## 7. Determination of Stereochemistry of Cyclopropanes

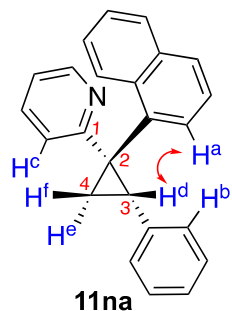

The geometry of cyclopropane **11na** was established on the basis of analysis of the chemical shifts and NOESY. From HMBC, cyclopropane quaternary carbon 2 has long range couplings with protons H<sup>a</sup> and H<sup>c</sup>, while pyridyl quaternary carbon 1 only has long range couplings signal with H<sup>c</sup>. Thus, it indicates that H<sup>c</sup> is on the pyridyl group and H<sup>a</sup> is on the naphthyl group, respectively. Cyclopropane H<sup>d</sup> proton showed NOESY correlations with naphthyl group H<sup>a</sup> proton, which means that H<sup>d</sup> is *cis* to the naphthyl group. Thus, pyridyl group is *cis* to phenyl group in cyclopropane **11na**.

### HMBC of **11na**

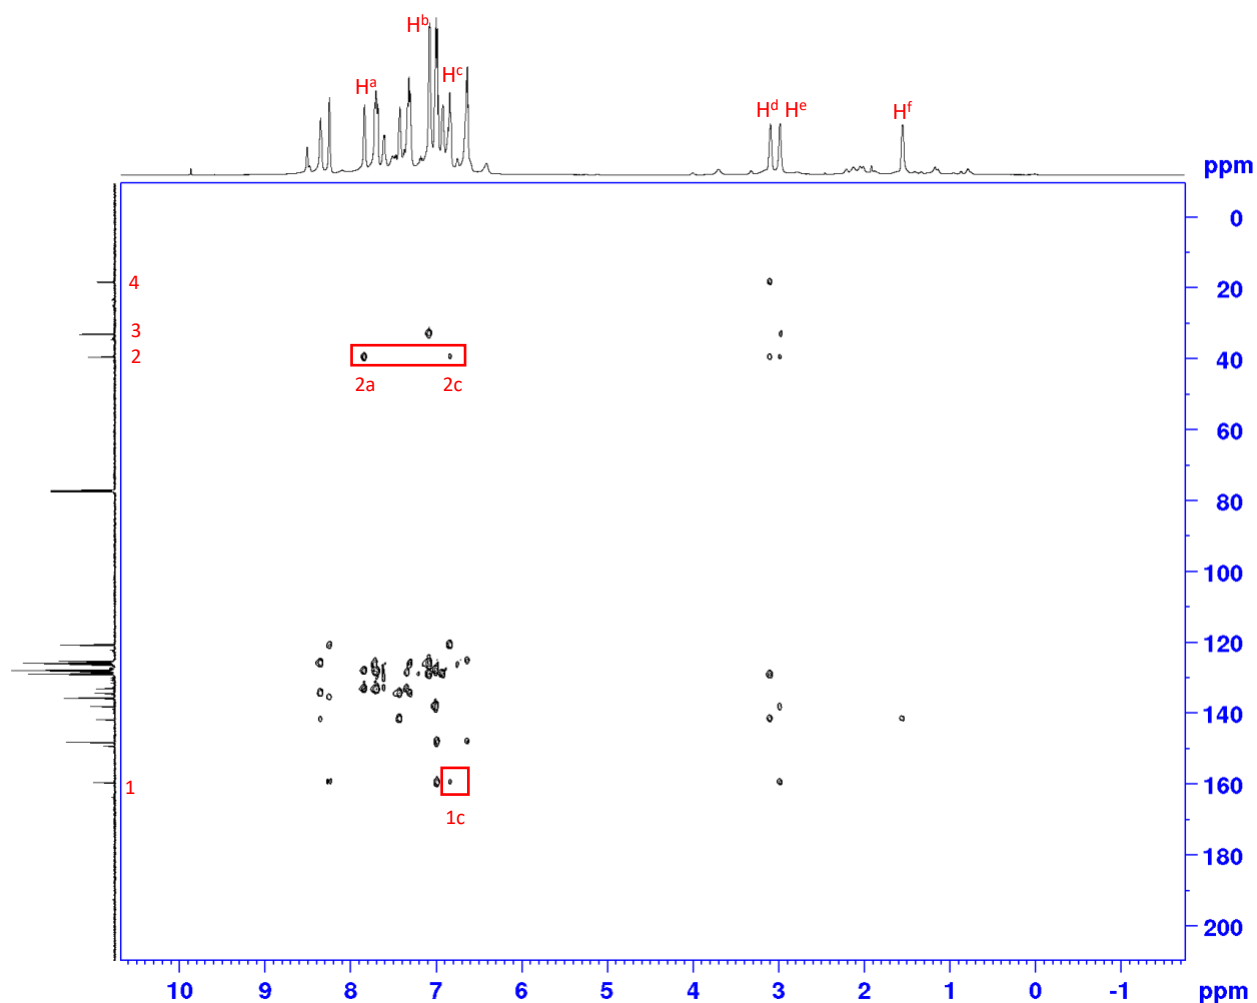

## NOESY of **11na**

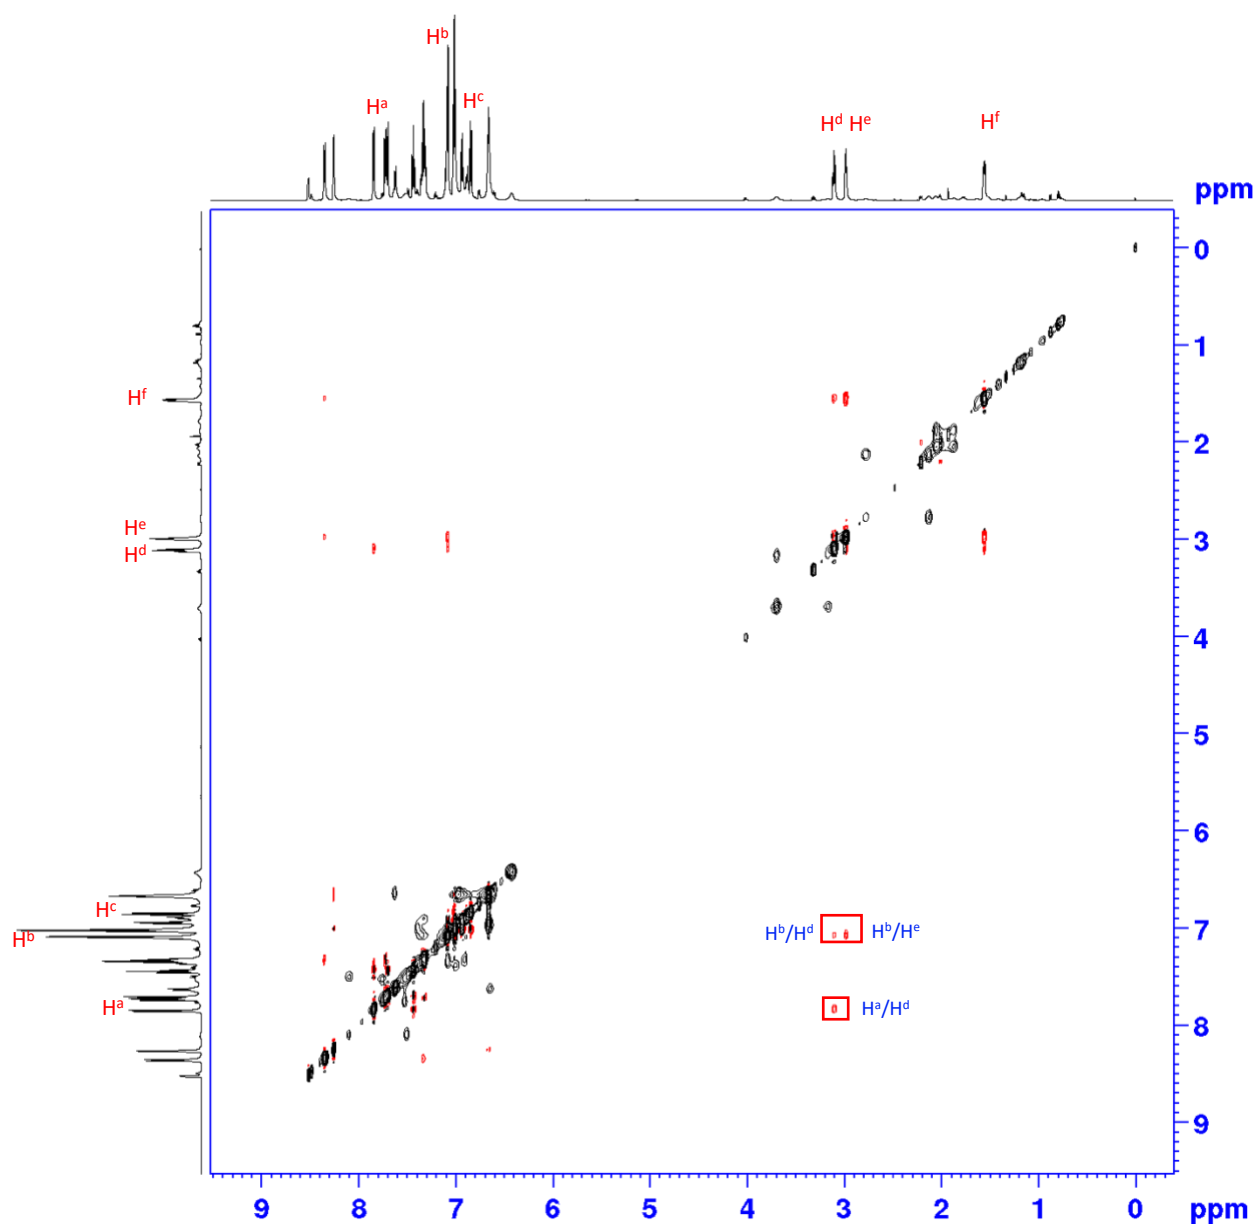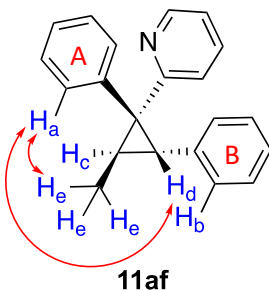

The geometry of cyclopropane **11af** was established on the analysis of the chemical shifts, coupling constants of cyclopropane ring protons and NOESY. Based on NOESY correlations of benzylic proton  $\text{H}^d$   $\delta$  2.72 ppm ( $J = 6.0$  Hz) and  $\text{H}^e$ , the two protons are in relation *trans* to each other in the major diastereomer.  $\text{H}^d$  and methyl group proton  $\text{H}^e$  both has NOESY correlations with  $\text{H}^a$ , which means that  $\alpha$ -phenyl group A is *cis* to both

methyl group and H<sup>d</sup>. Thus, pyridyl group is *cis* to α-phenyl group B and *trans* to methyl group in cyclopropane **11af**.

NOSEY of **11af**

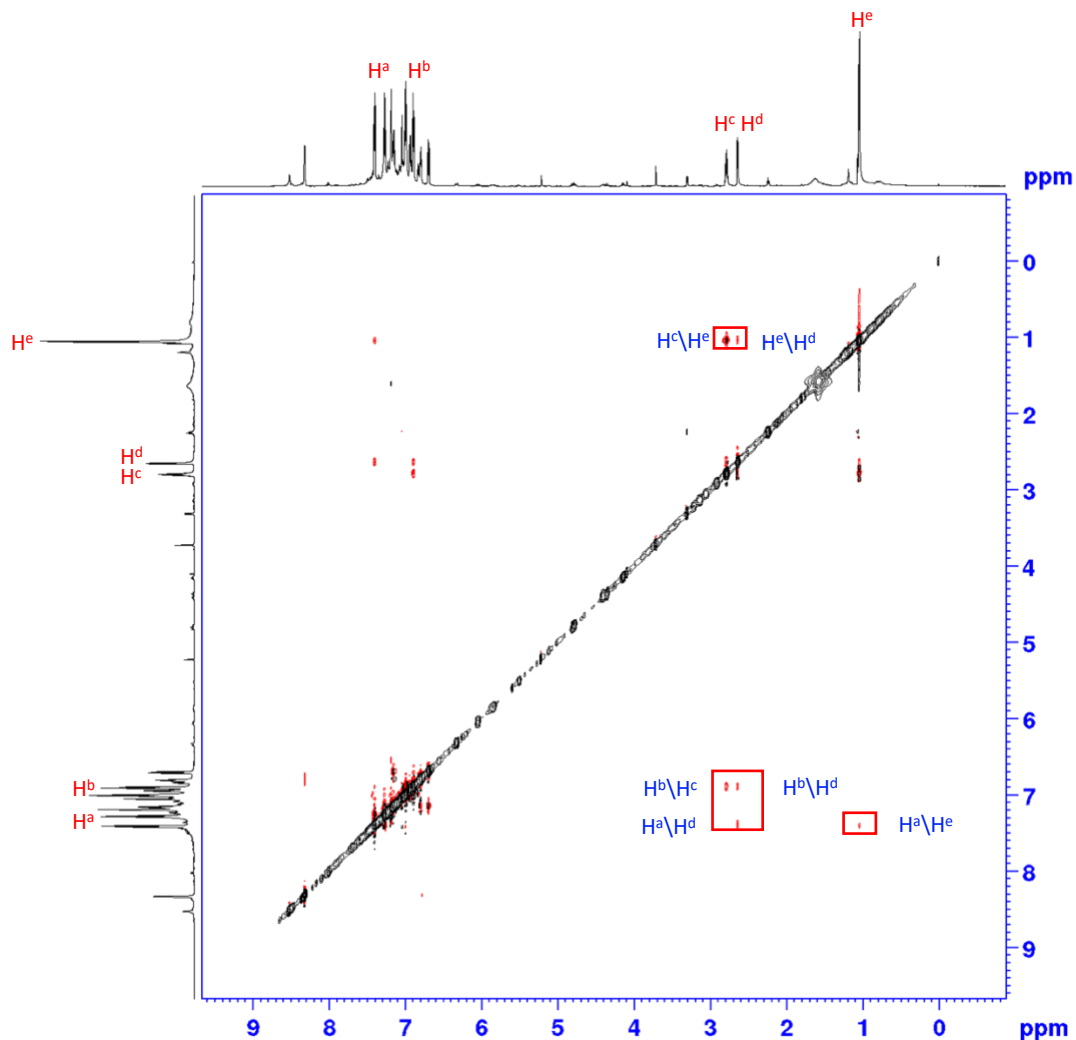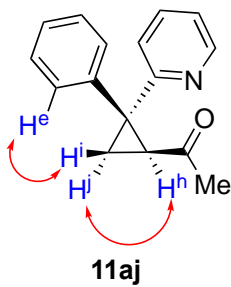

**11aj.**

The geometry of cyclopropane **11aj** was established on the basis of analysis of the chemical shifts, COSY and NOESY. H<sup>i</sup> has NOESY correlations with α-phenyl group proton H<sup>e</sup>, which means that α-phenyl group is *cis* to H<sup>i</sup>. Cyclopropane proton H<sup>j</sup> has NOESY correlations with H<sup>h</sup>, which means that they are *cis* to each other. Thus, pyridyl group is *trans* to acetyl group in cyclopropane

$^1\text{H}$  NMR of **11aj** (expansion)

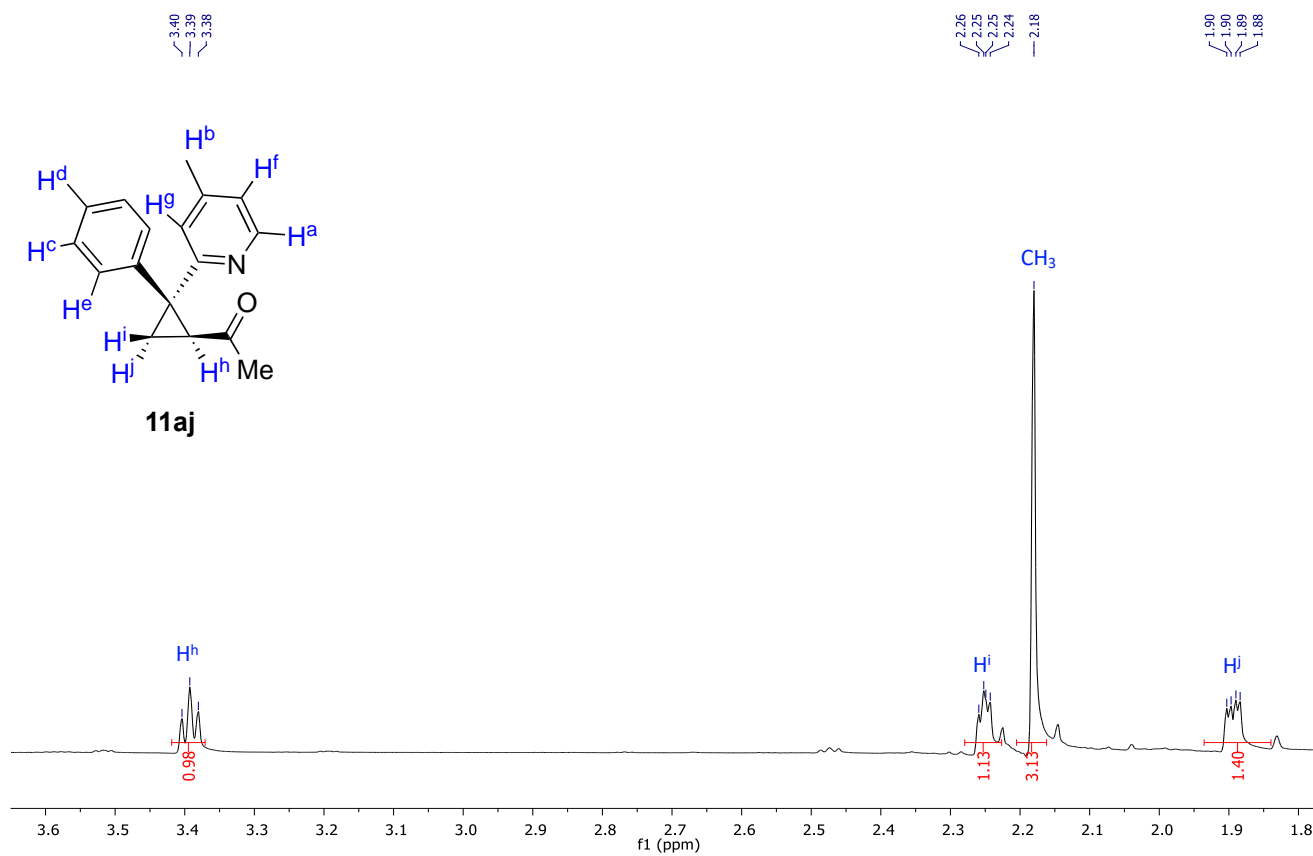

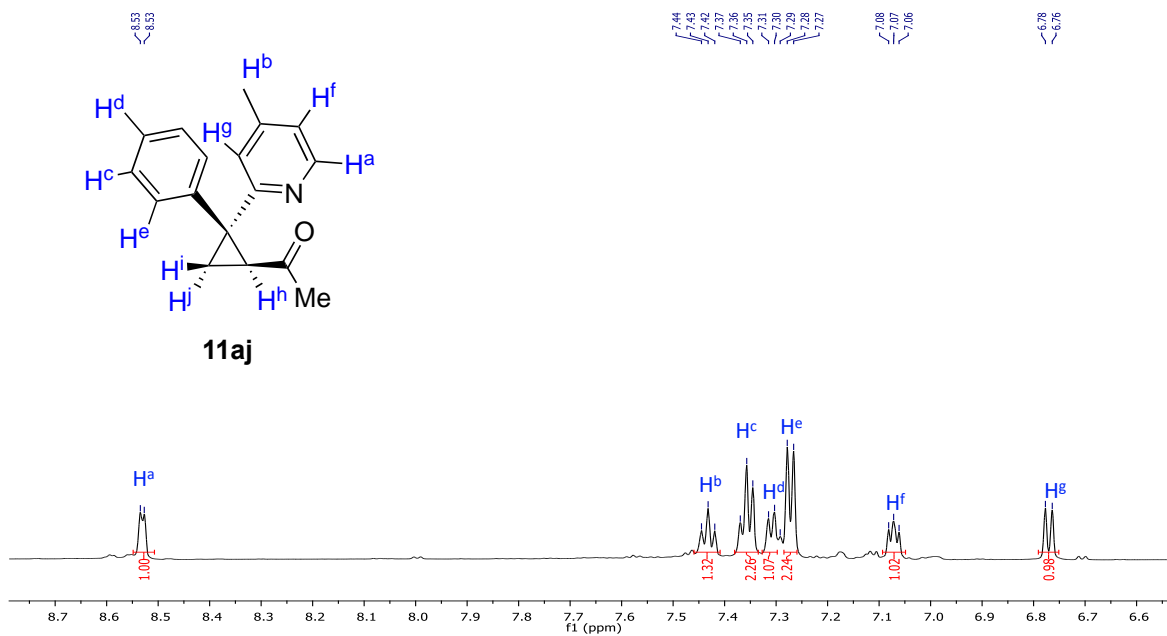

COSY of **11aj**

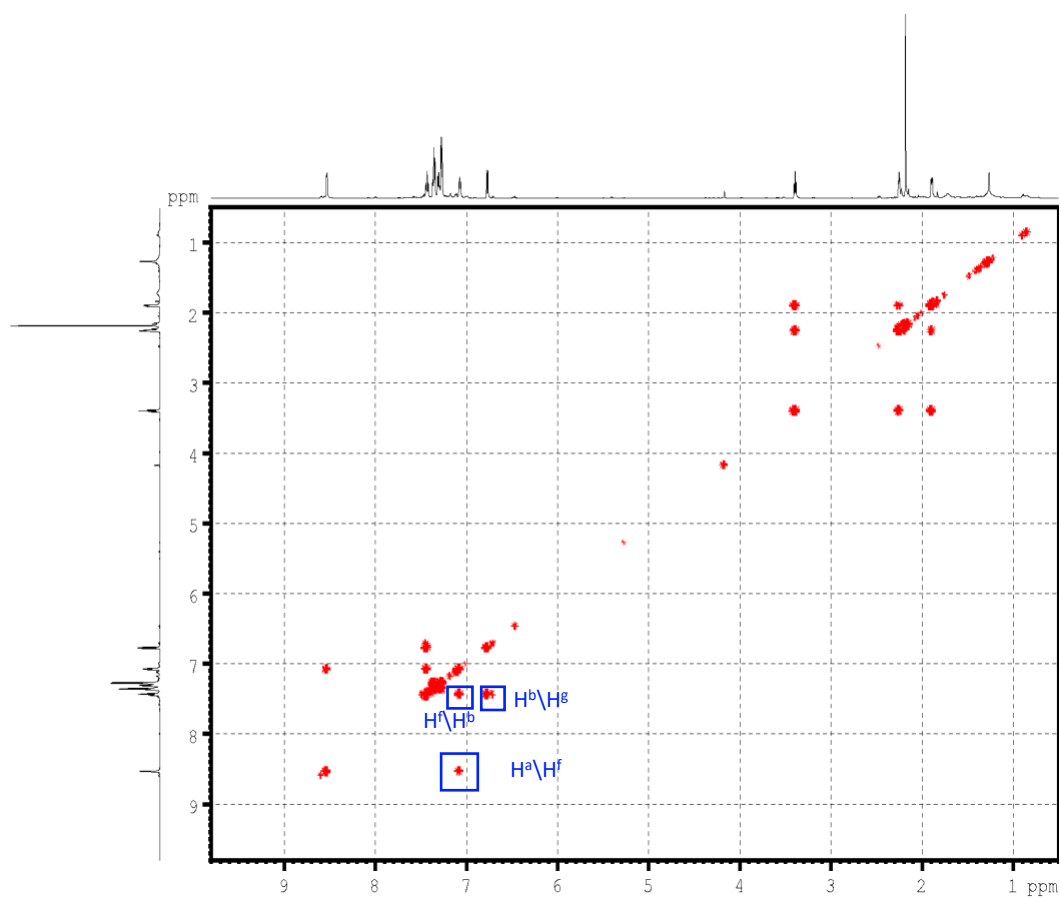

# NOESY of **11aj**

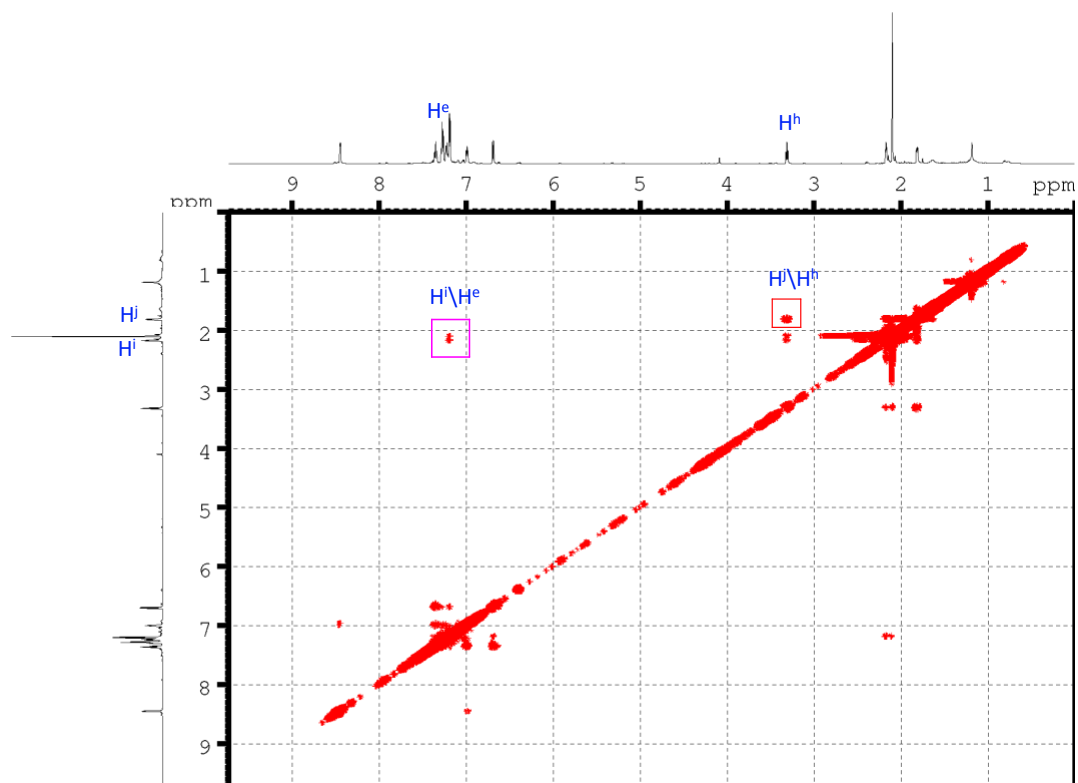

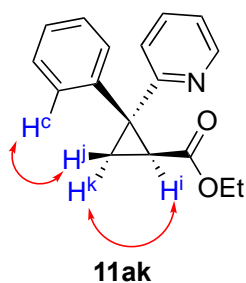

The geometry of cyclopropane **11ak** was established on the basis of analysis of the chemical shifts, COSY and NOESY.  $H^j$  has NOESY signals with  $\alpha$ -phenyl group proton  $H^c$ , which means that  $\alpha$ -phenyl group is *cis* to  $H^j$ . Cyclopropane proton  $H^k$  has NOESY correlations with  $H^i$ , which means that they are *cis* to each other. Thus, pyridyl group is *trans* to carbethoxy group in cyclopropane **11ak**.

$^1\text{H}$  NMR of **11ak** (expansion)

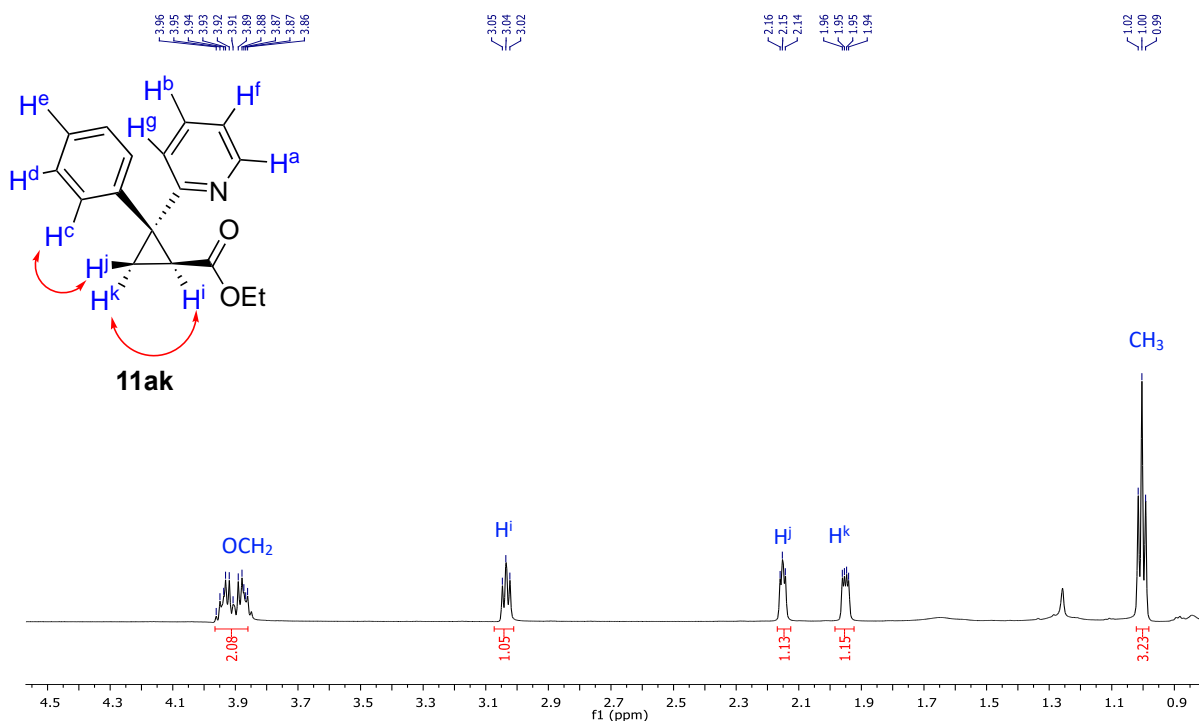

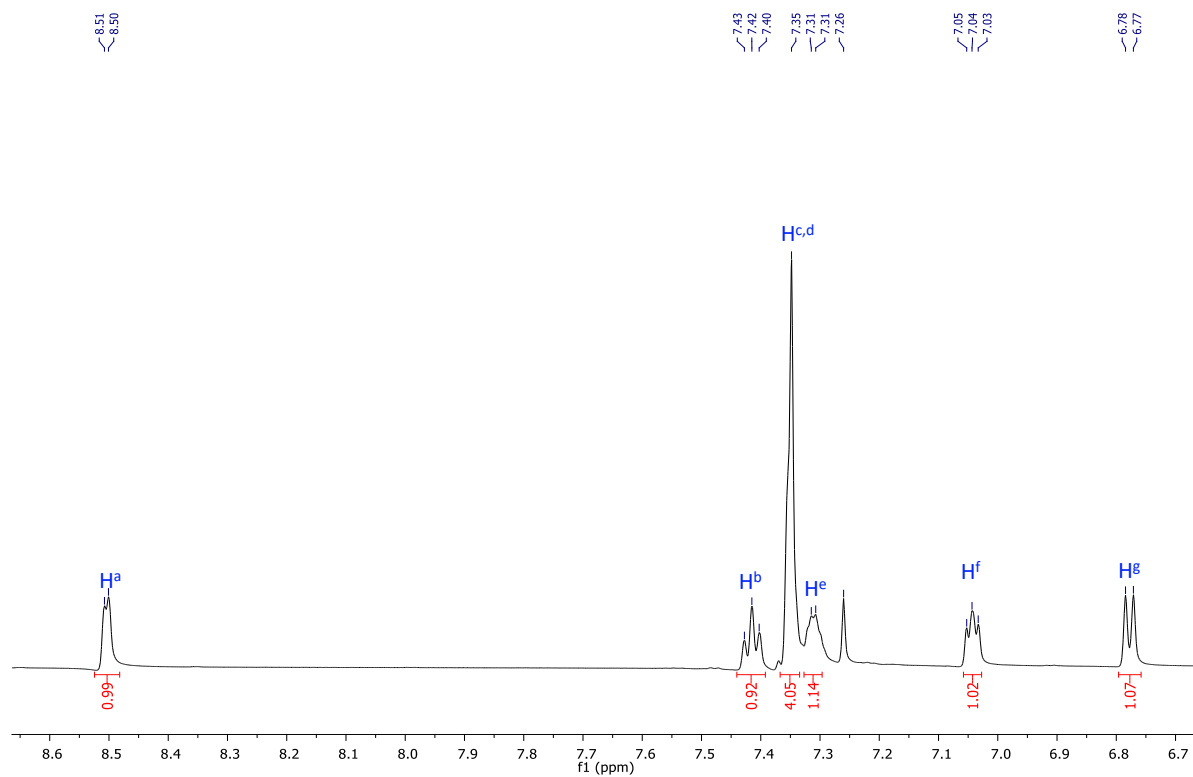

## COSY 11ak

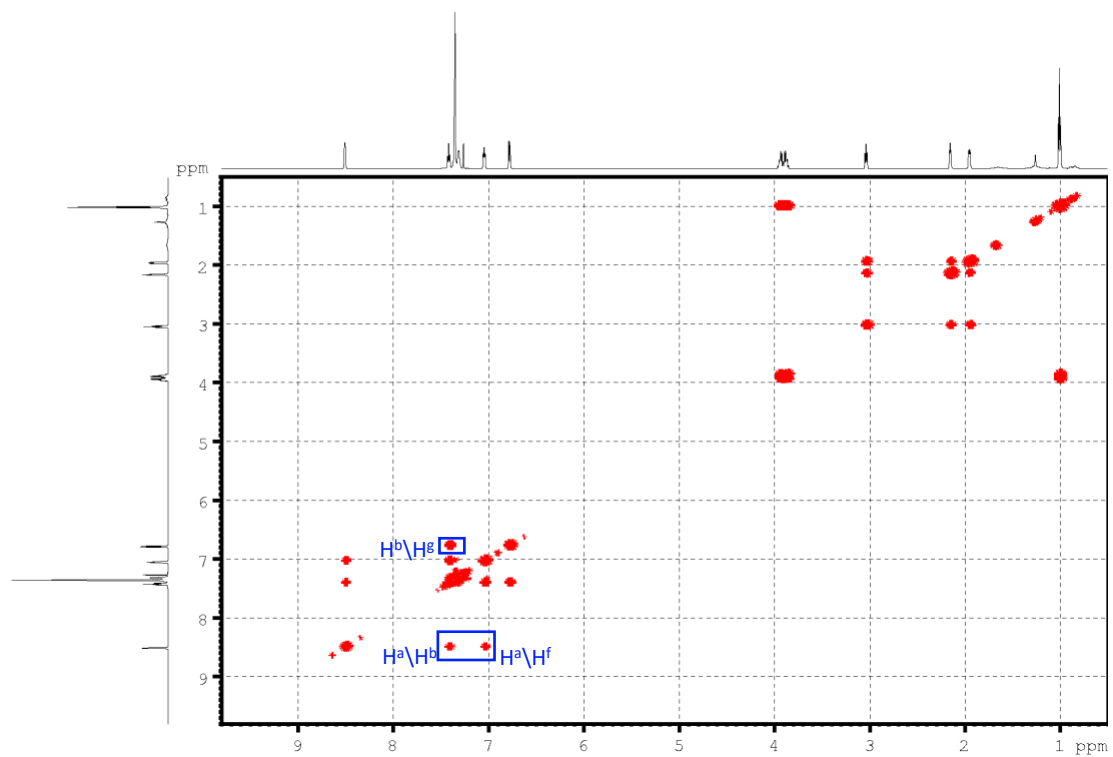

## NOESY **11ak**

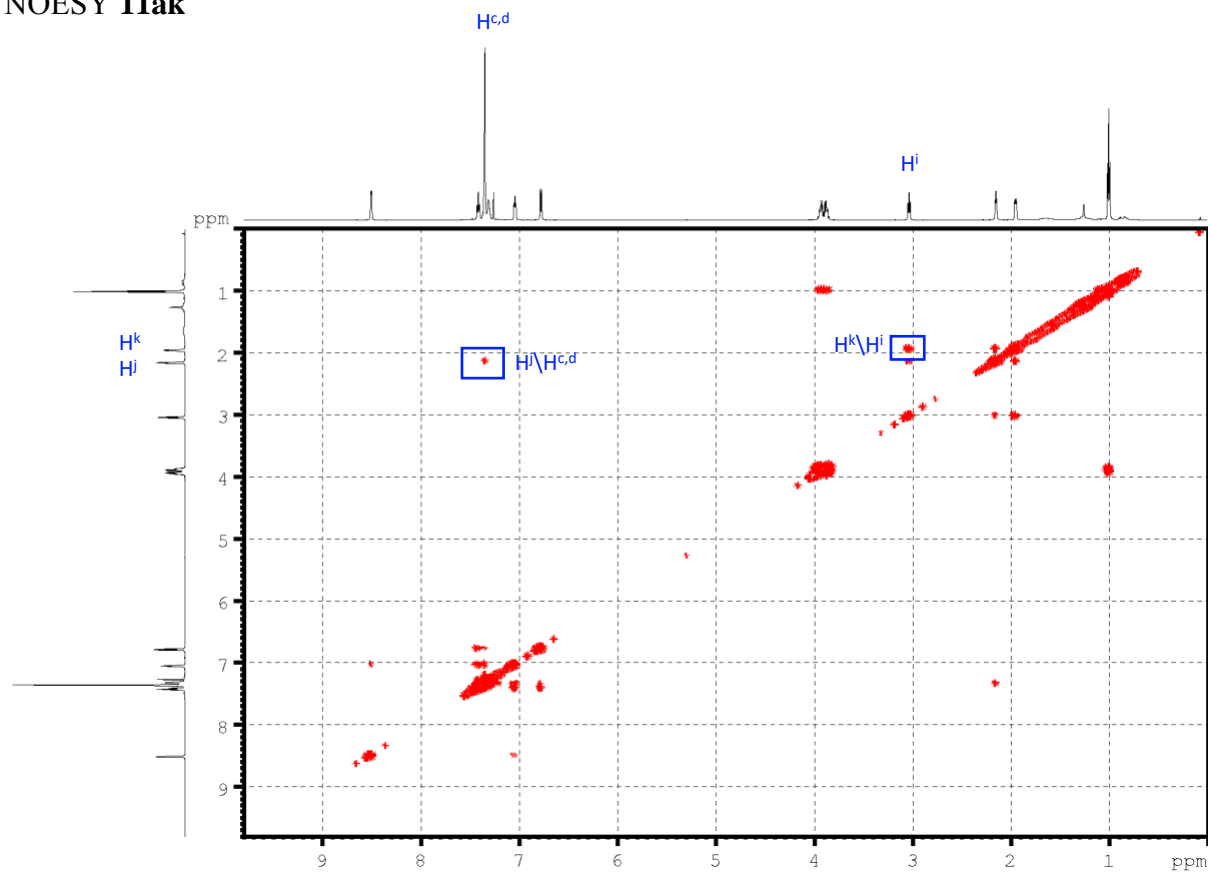

In order to get additional evidence for stereochemistry of **11ak**, it was reduced to alcohol **11ak'**.

### Preparation of **11ak'** from **11ak**

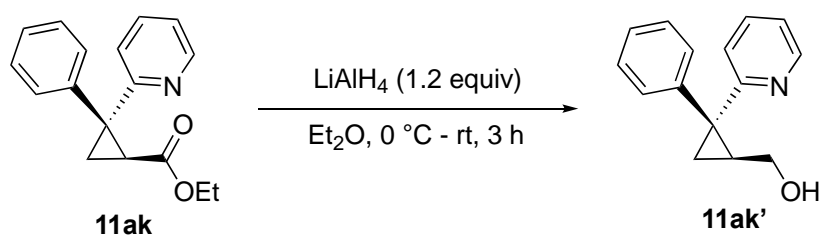

To a stirred solution of  $\text{LiAlH}_4$  (9.0 mg, 0.24 mmol, 1.2 equiv) in  $\text{Et}_2\text{O}$  (4.0 mL) at 0 °C, compound **11ak** (53.0 mg, 0.2 mmol, 1.0 equiv) in  $\text{Et}_2\text{O}$  (2.0 mL) was added under Ar atmosphere. After being stirred for 3 h, the reaction mixture was quenched with saturated  $\text{Na}_2\text{SO}_4$ . The aqueous layer was extracted with two portions of ethyl acetate. The combined extract was dried over  $\text{MgSO}_4$  and

concentrated under reduced pressure. The residue was purified by column chromatography on silica gel with hexanes : ethyl acetate = 70 : 30 to give reduced compound (**11ak'**) in 80% yield (36.0 mg, 0.16 mmol). Colorless oil.  $R_f$ (hexanes/EtOAc = 4/1): 0.27.  $^1\text{H}$  NMR (600 MHz,  $\text{CDCl}_3$ )  $\delta$  ppm 8.48 (d,  $J = 3.0$  Hz, 1H), 7.44–7.41 (m, 3H), 7.39–7.36 (m, 2H), 7.32–7.30 (m, 1H), 7.01–6.99 (m, 1H), 6.81 (d,  $J = 8.0$  Hz, 1H), 3.54–3.36 (m, 2H), 2.46–2.39 (m, 1H), 1.84 (s, 1H), 1.64 (dd,  $J = 8.8, 4.1$  Hz, 1H), 1.39–1.33 (m, 1H).  $^{13}\text{C}$  NMR (151 MHz,  $\text{CDCl}_3$ )  $\delta$  Ppm 164.0, 148.9, 139.4, 135.9, 131.4, 128.8, 127.3, 122.3, 120.5, 63.7, 36.6, 29.8, 20.3.

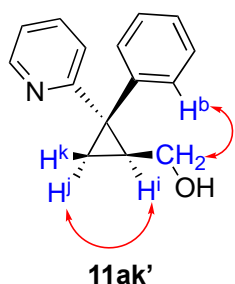

The geometry of cyclopropane **11ak'** was established on the basis of analysis of the chemical shifts, COSY and NOESY.  $\text{H}^j$  has NOESY correlations with cyclopropane proton  $\text{H}^i$ , which means that they are *cis* to each other.  $\alpha$ -phenyl group proton  $\text{H}^b$  has NOESY correlations with  $\text{CH}_2$ , which means that they are *cis* to each other. Thus, pyridyl group is *trans* to hydroxymethyl group.

$^1\text{H}$  NMR of **11ak'** (expansion)

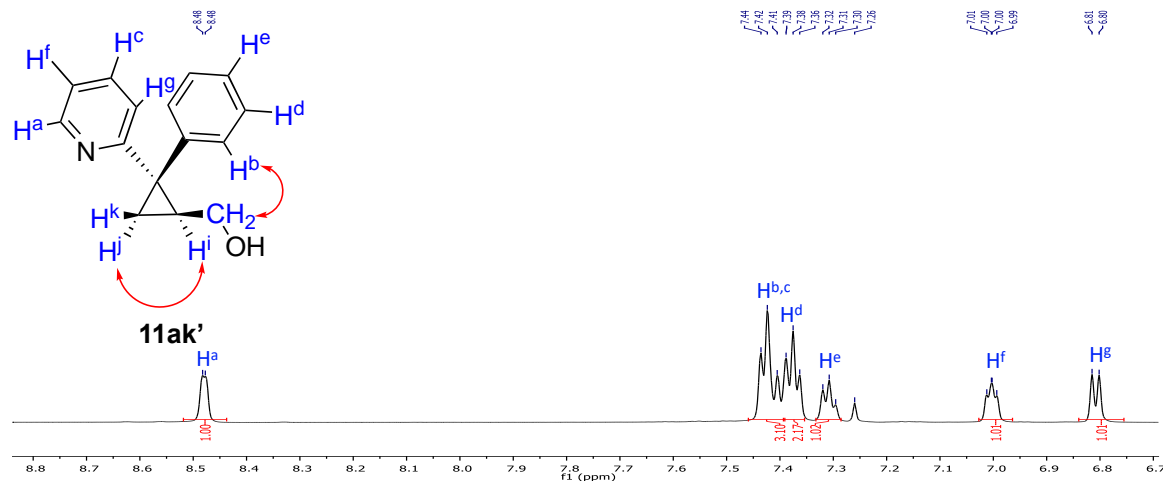

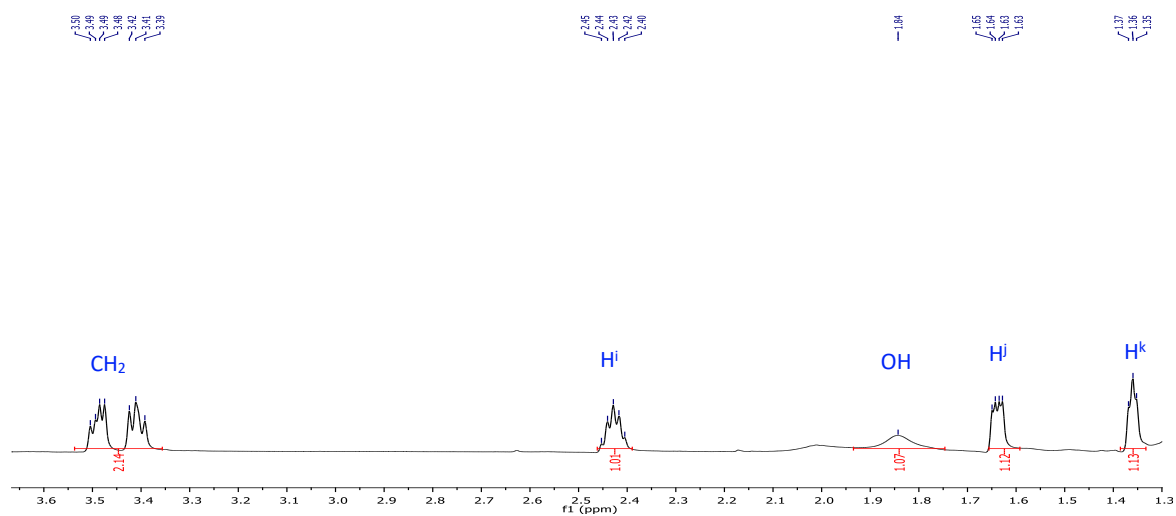

COSY 11ak'

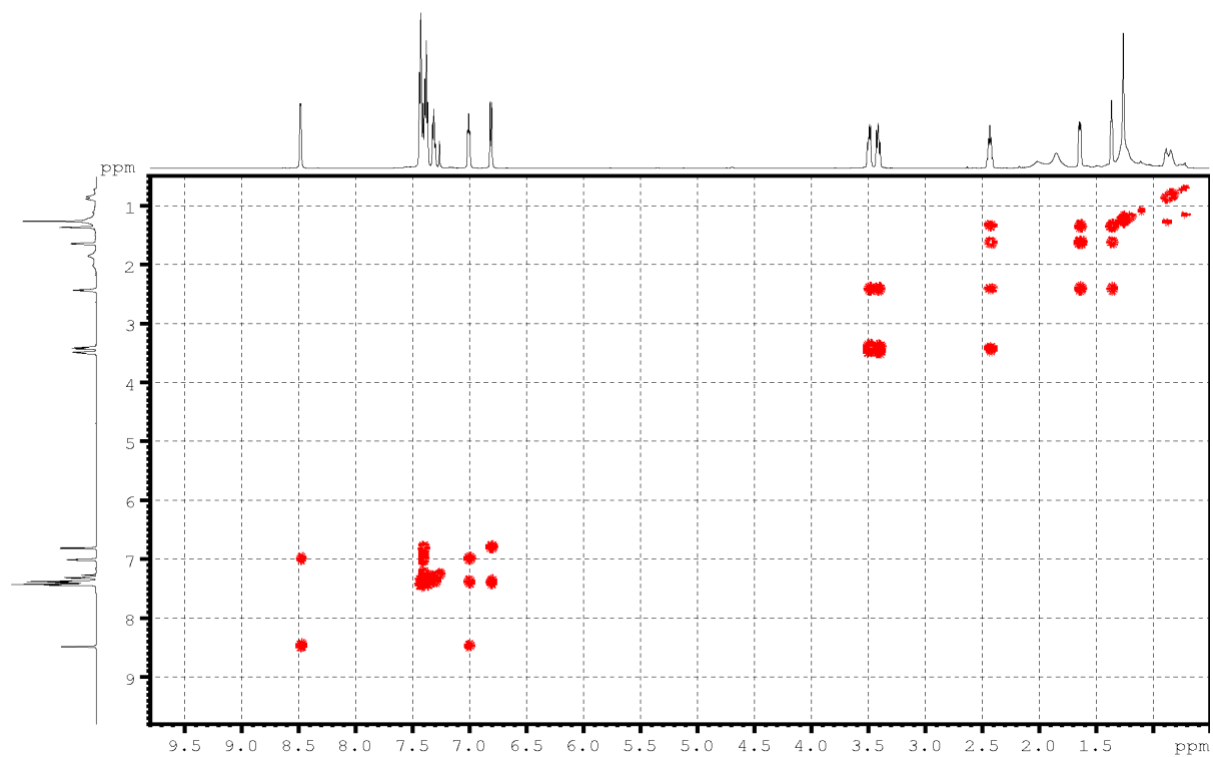

# NOESY 11ak'

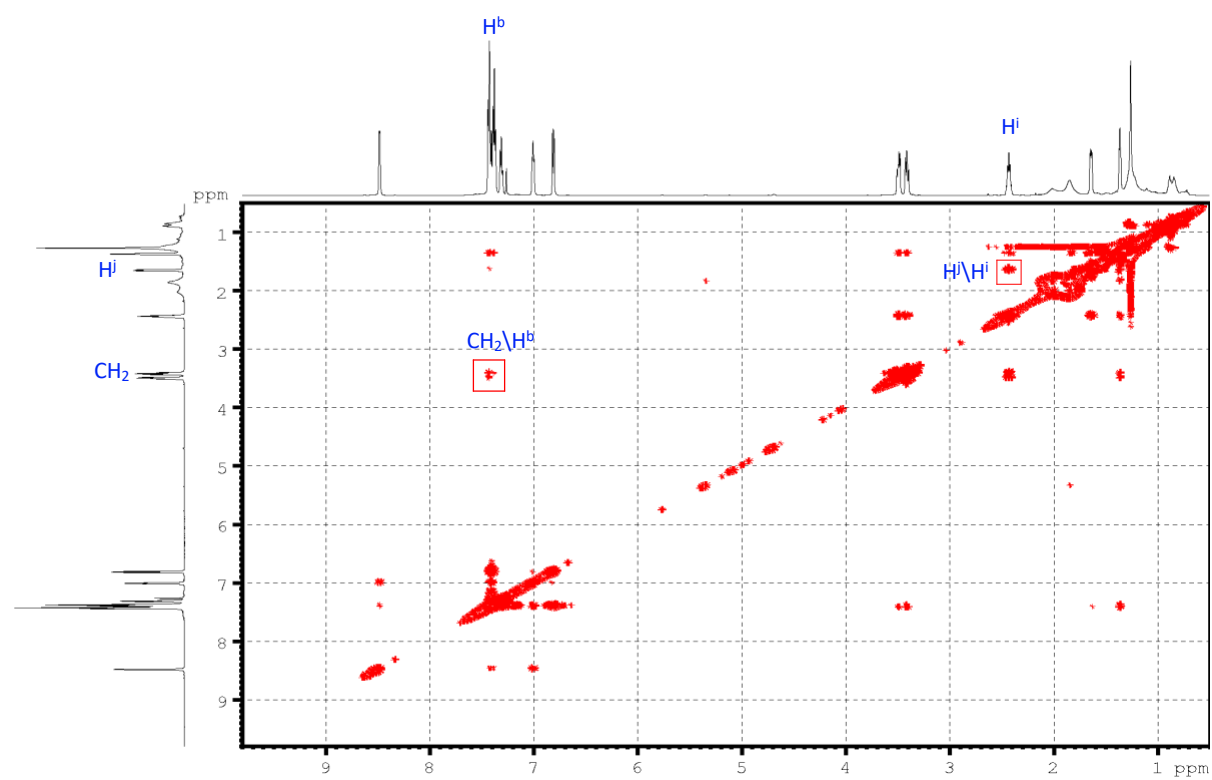

## 7. NMR Spectral Data

### <sup>1</sup>H NMR of **1j**

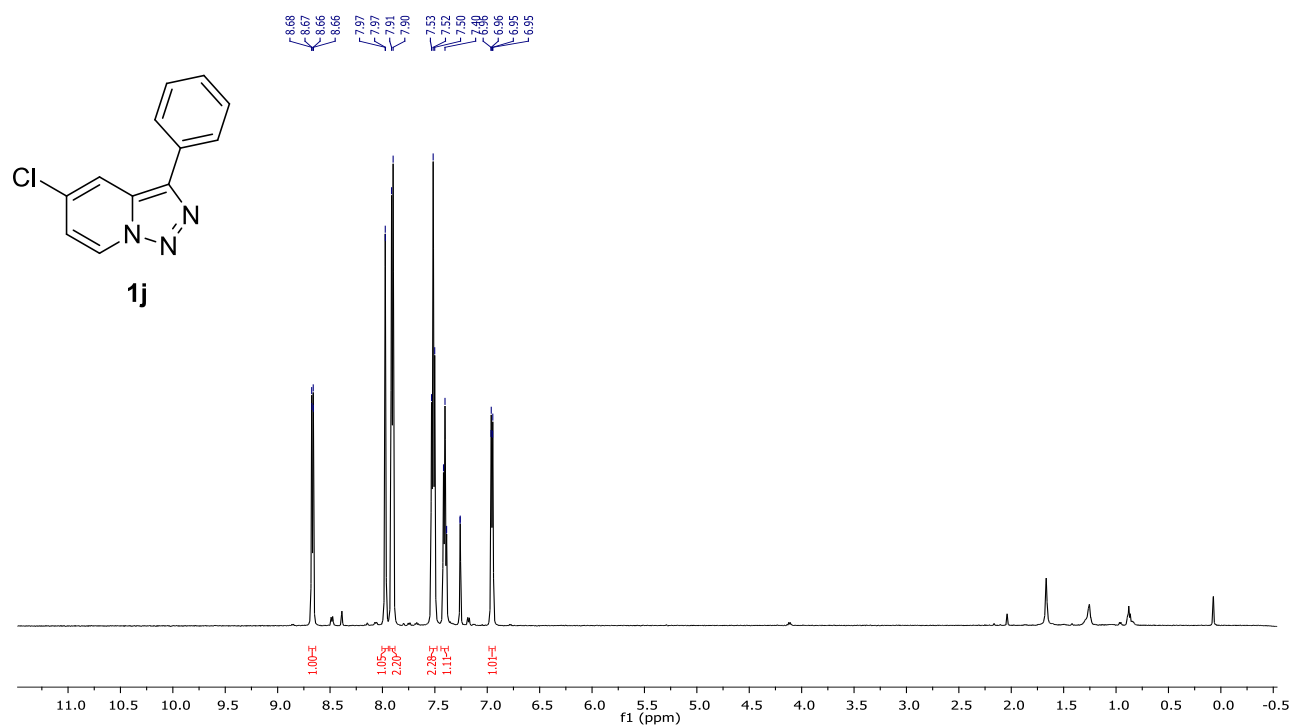

### <sup>13</sup>C NMR of **1j**

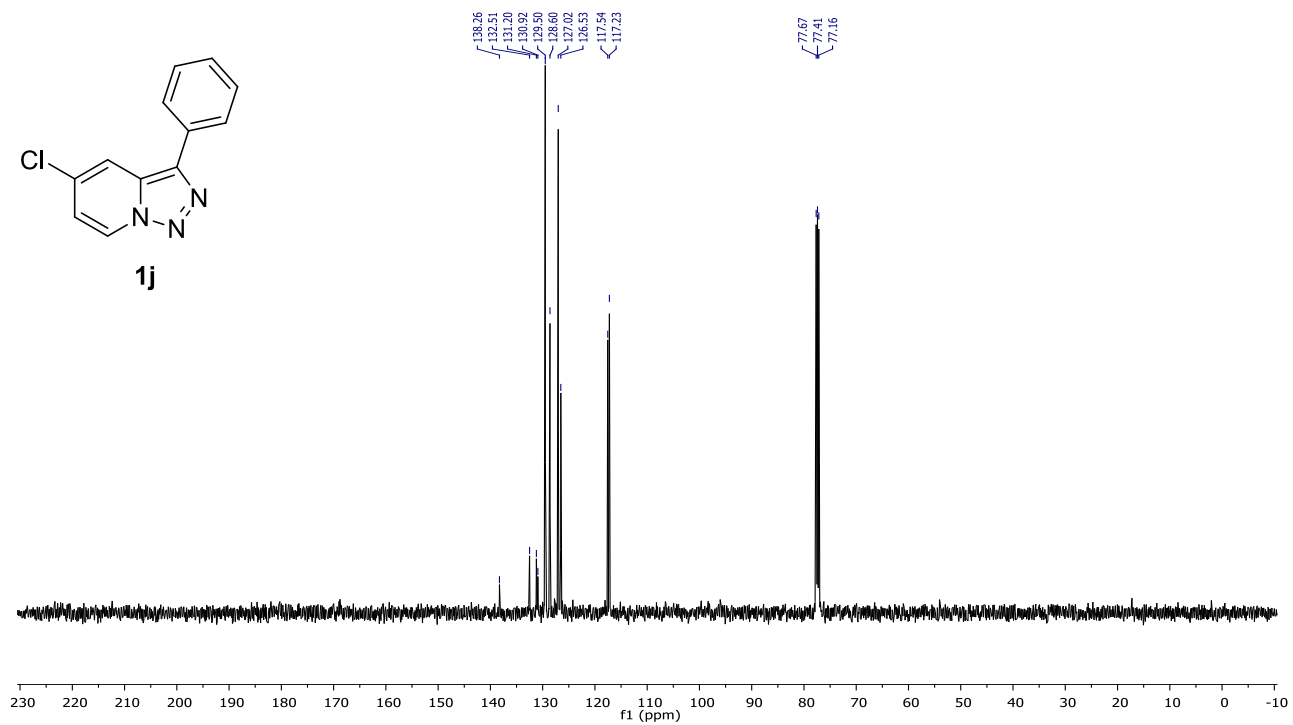

# <sup>1</sup>H NMR of **11**

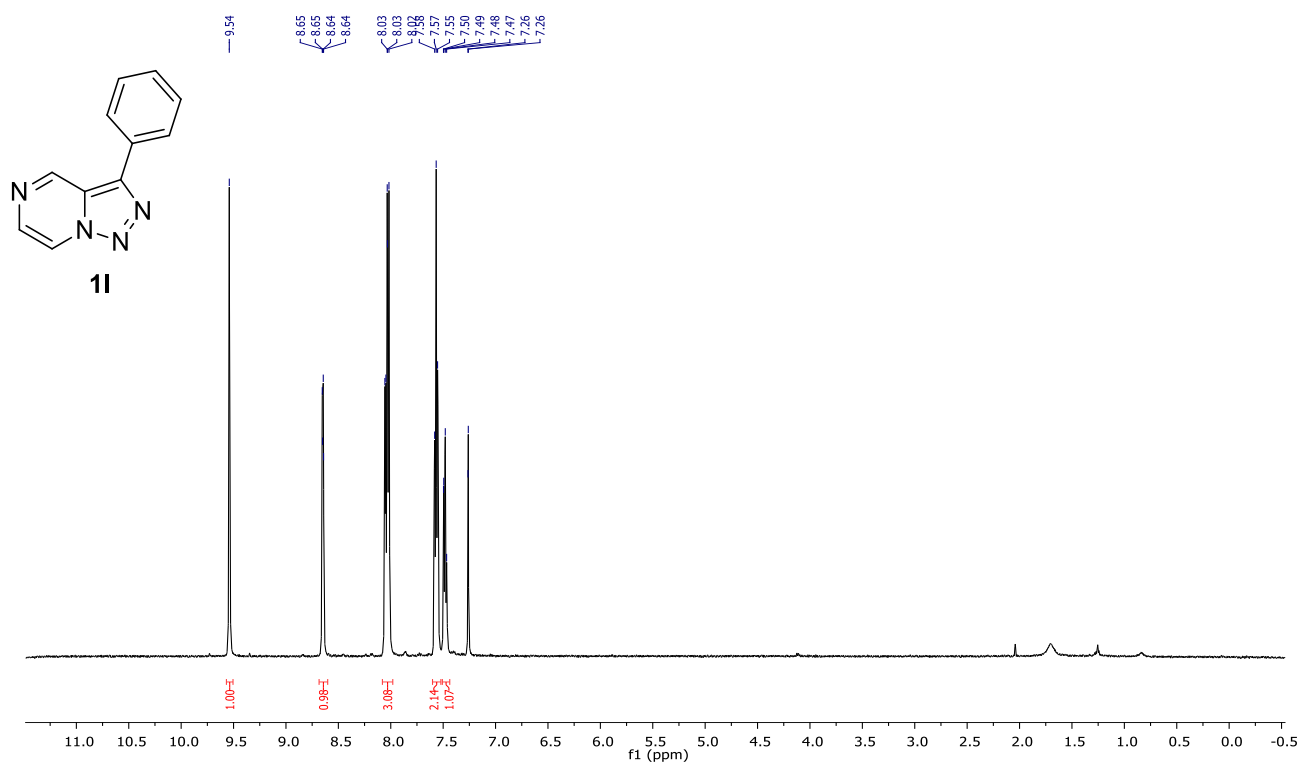

# <sup>13</sup>C NMR of **11**

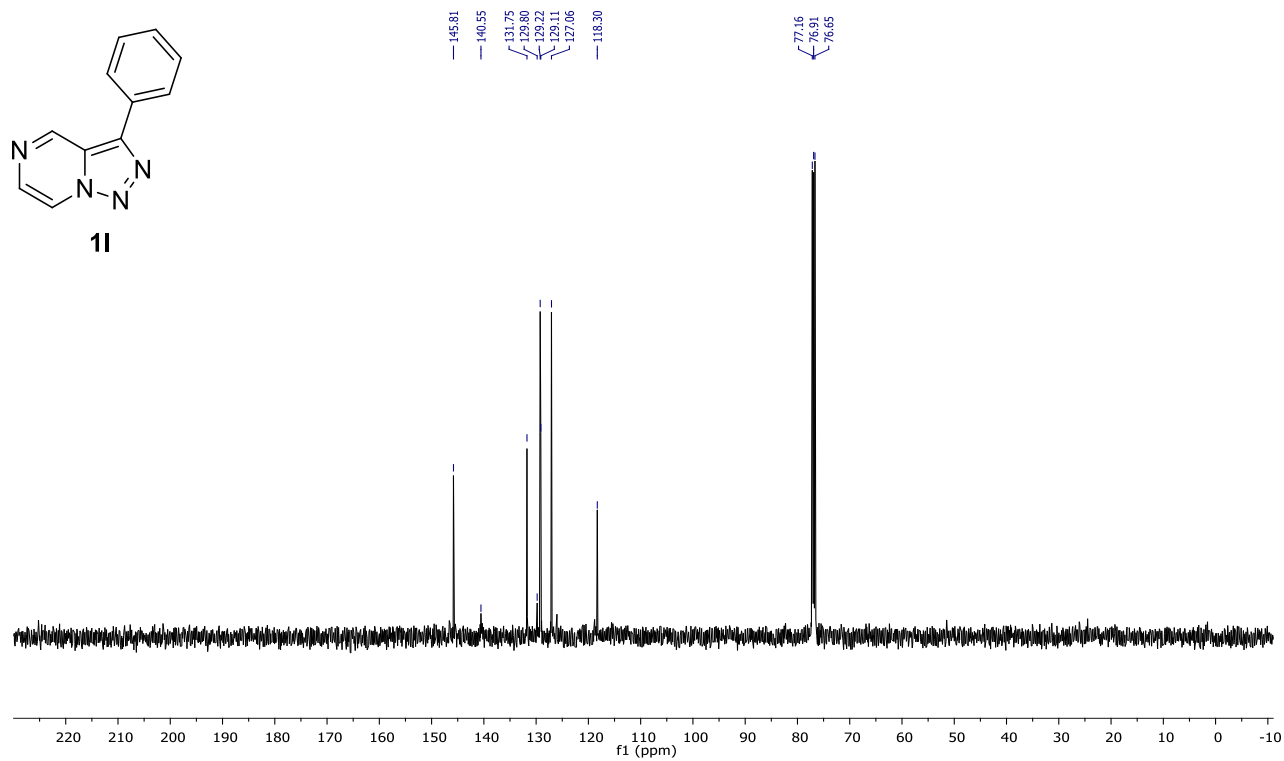

# <sup>1</sup>H NMR of **3aa**

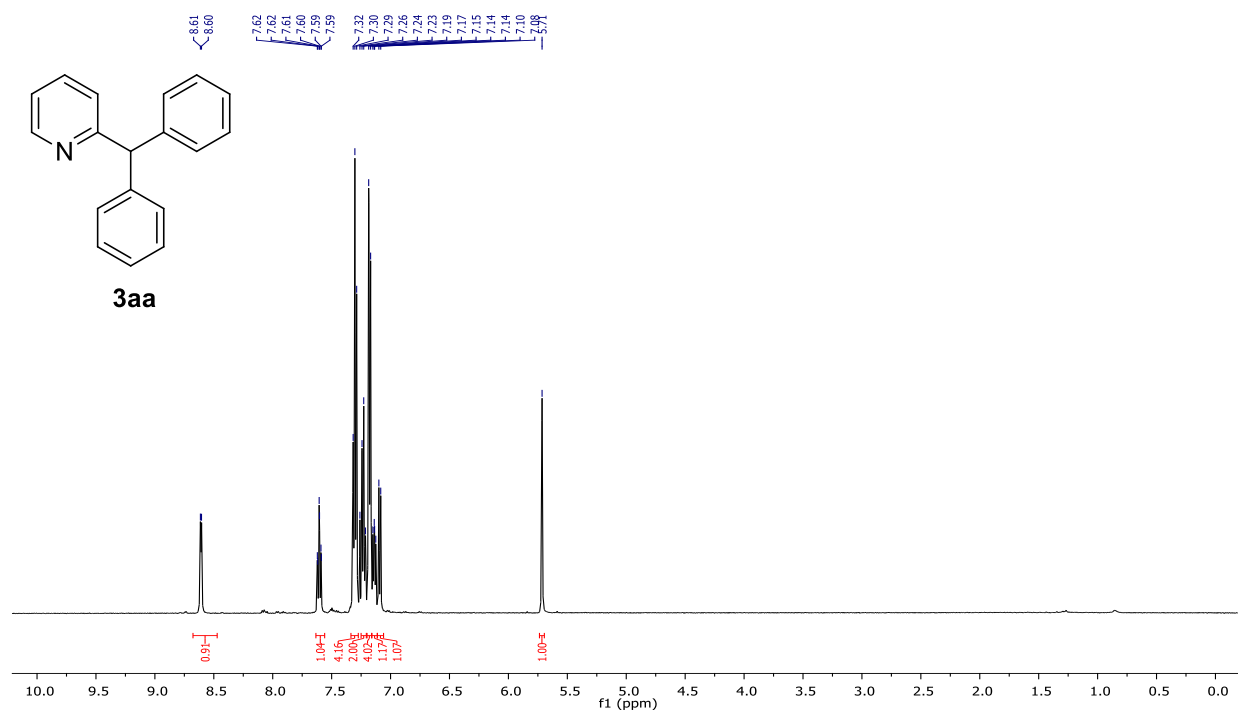

# <sup>13</sup>C NMR of **3aa**

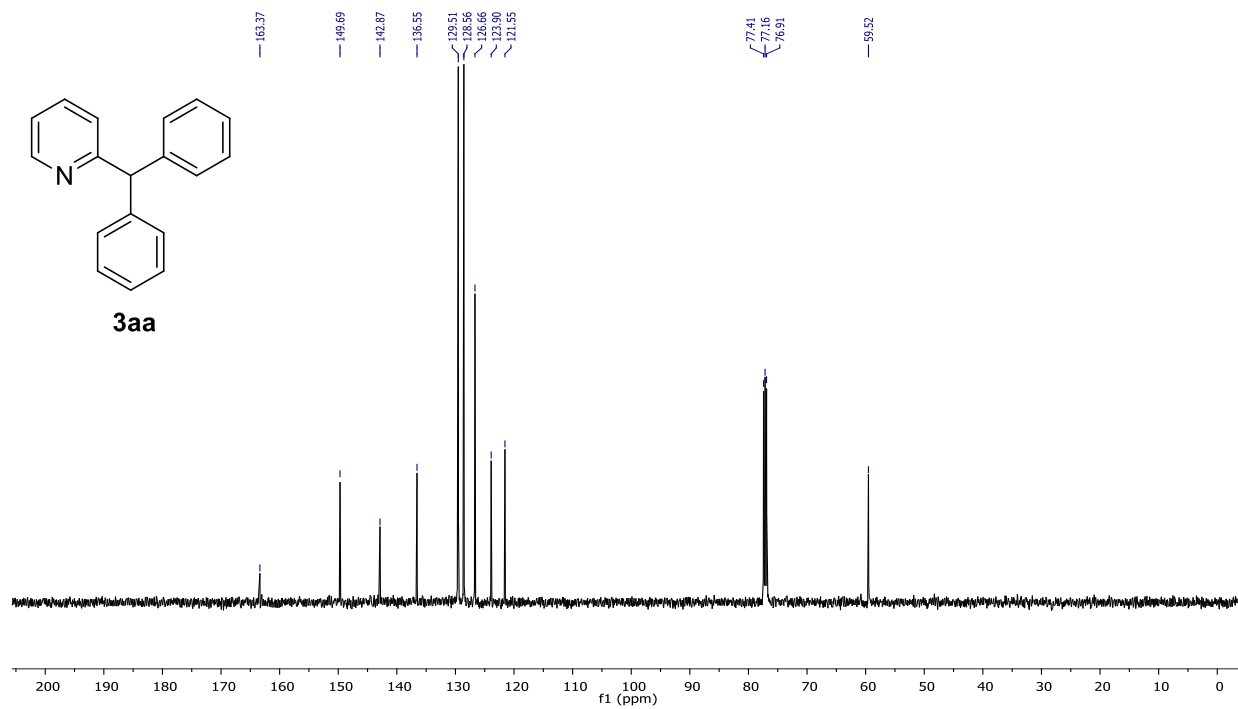

# <sup>1</sup>H NMR of **3ab**

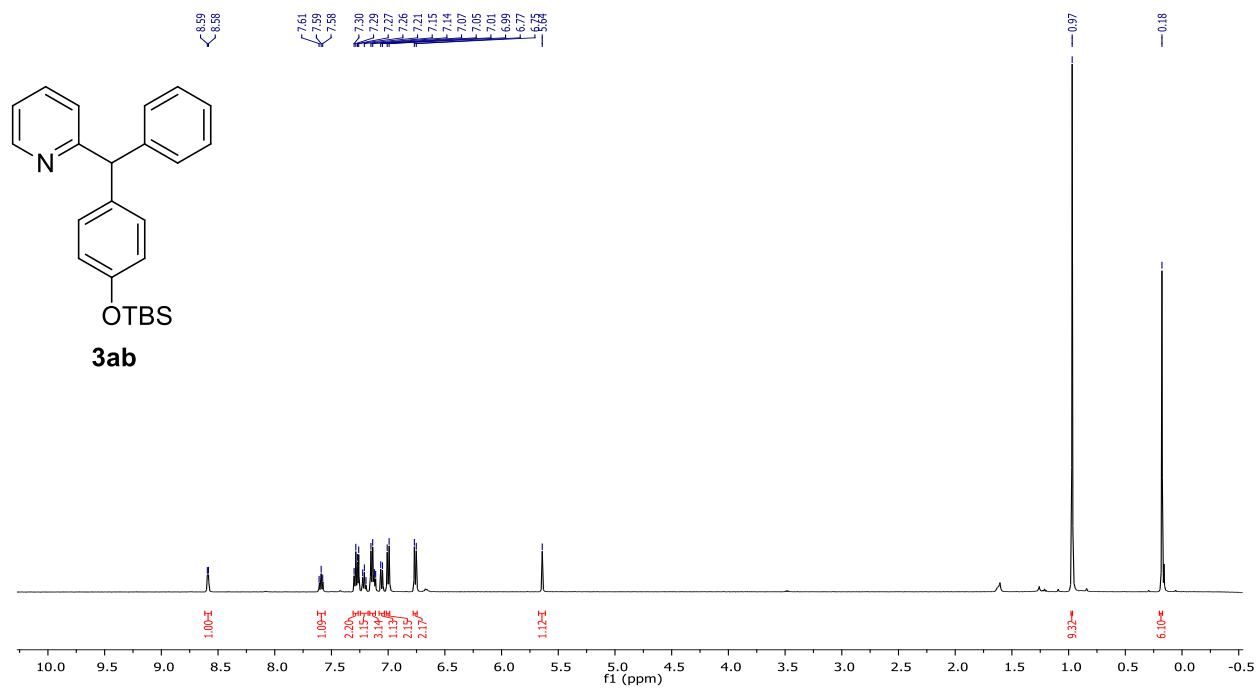

# <sup>13</sup>C NMR of **3ab**

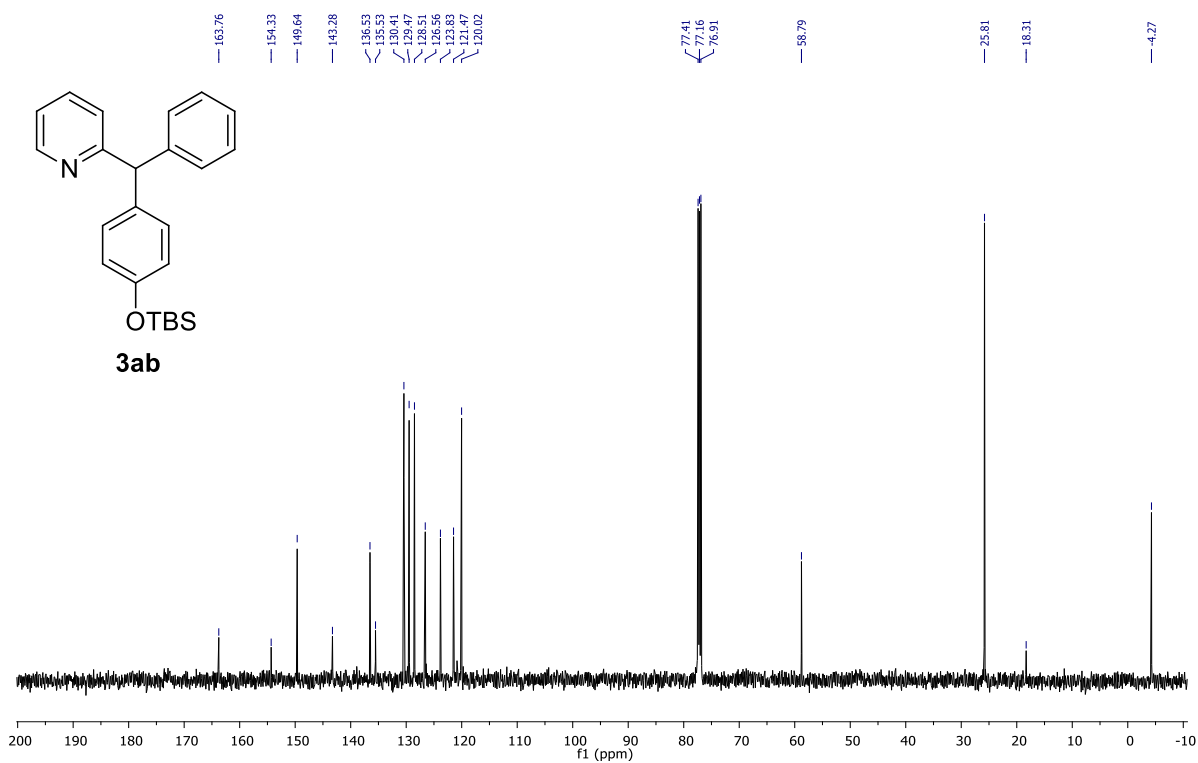

# <sup>1</sup>H NMR of **3ac**

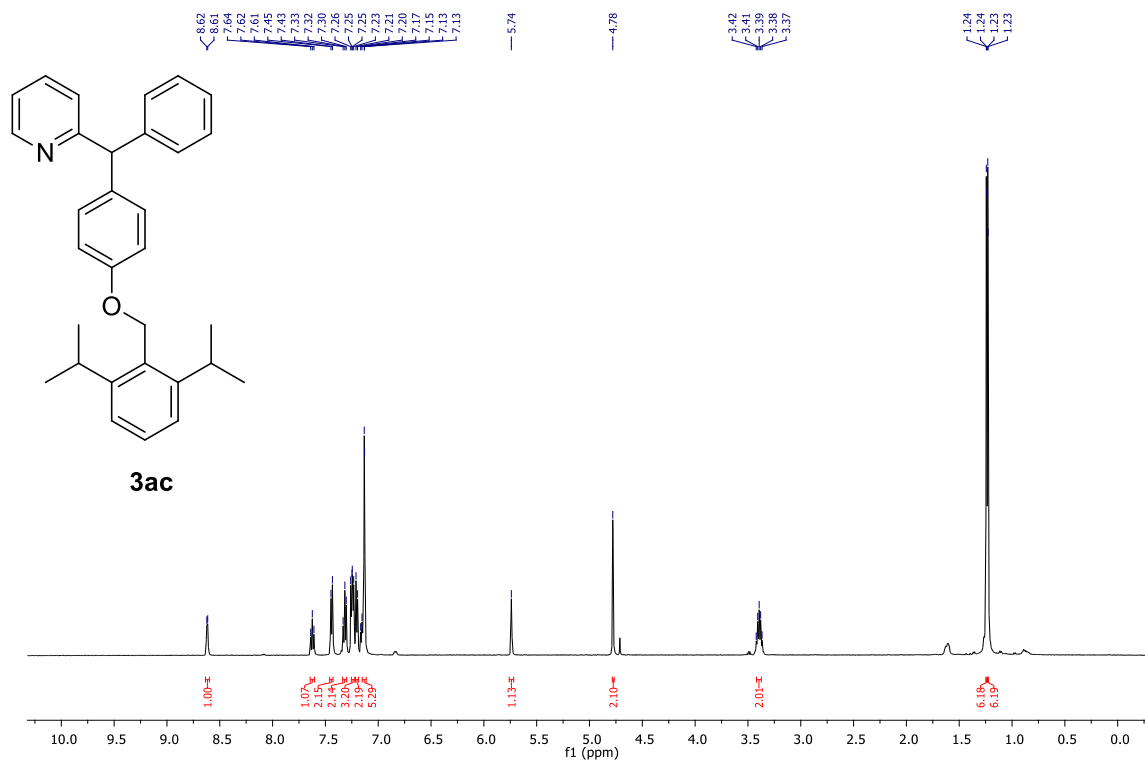

# <sup>13</sup>C NMR of **3ac**

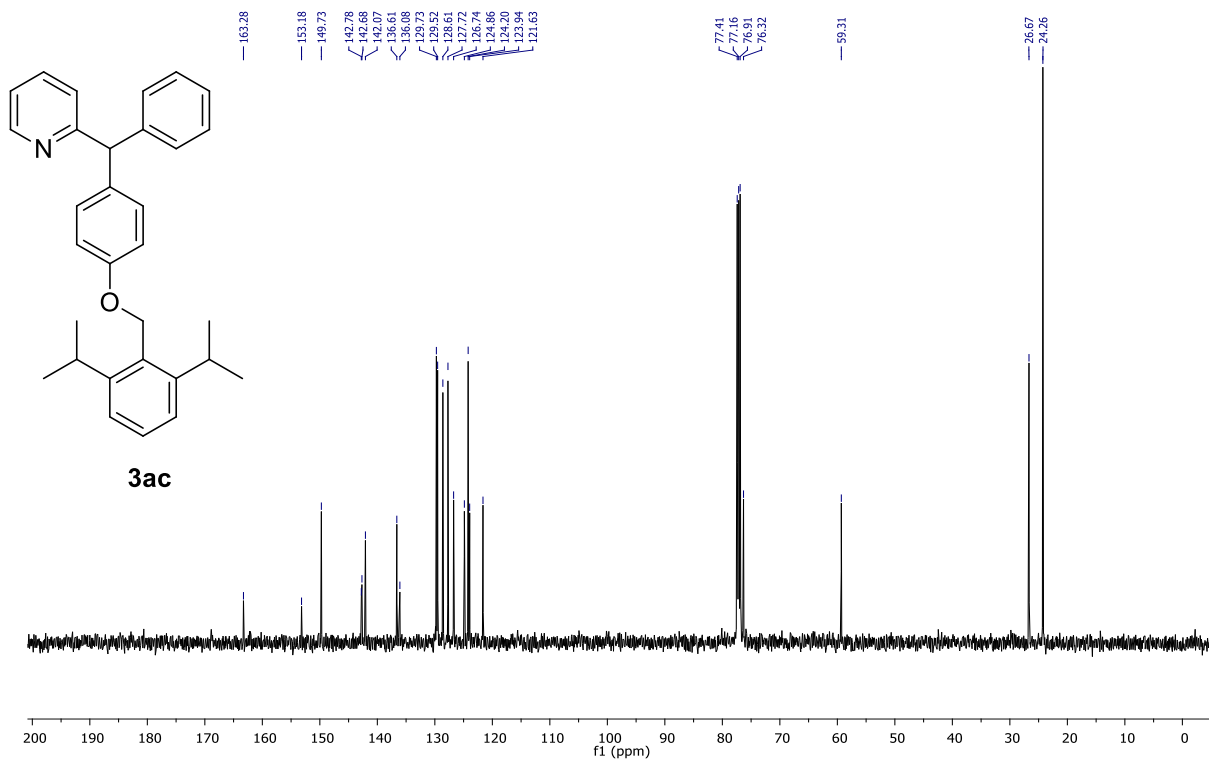

# <sup>1</sup>H NMR of **3ad**

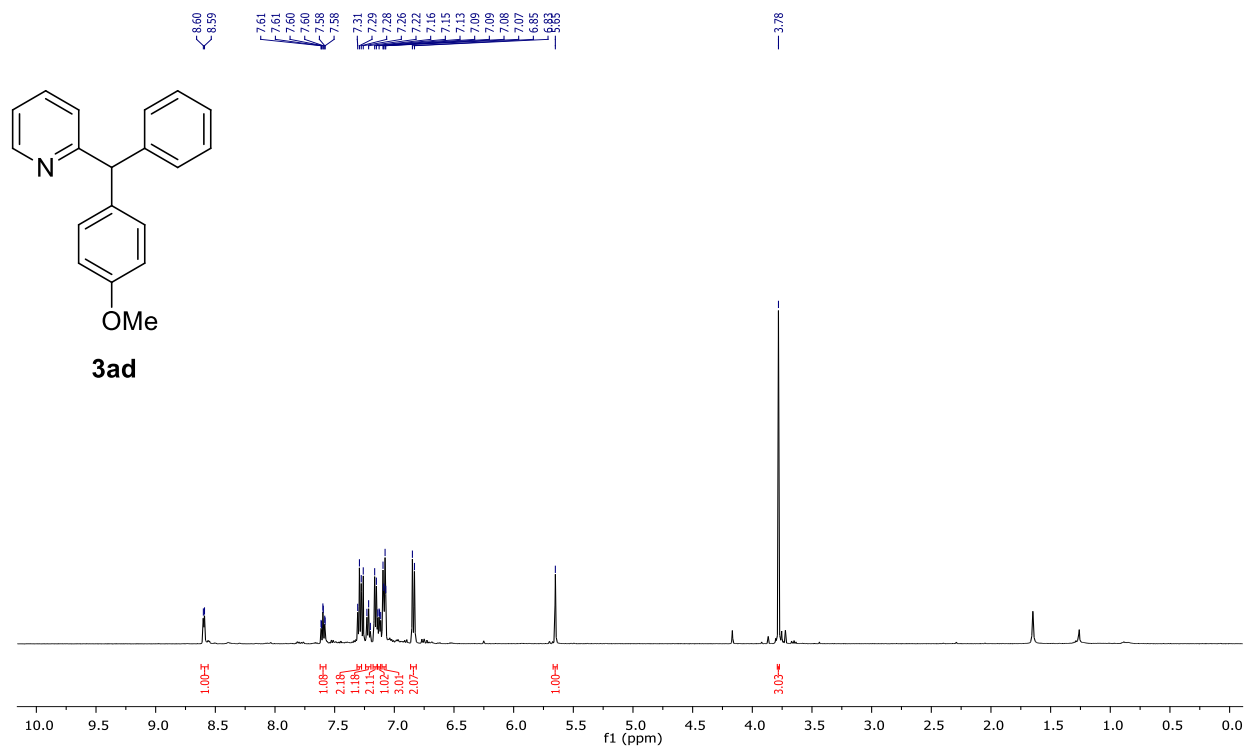

# <sup>13</sup>C NMR of **3ad**

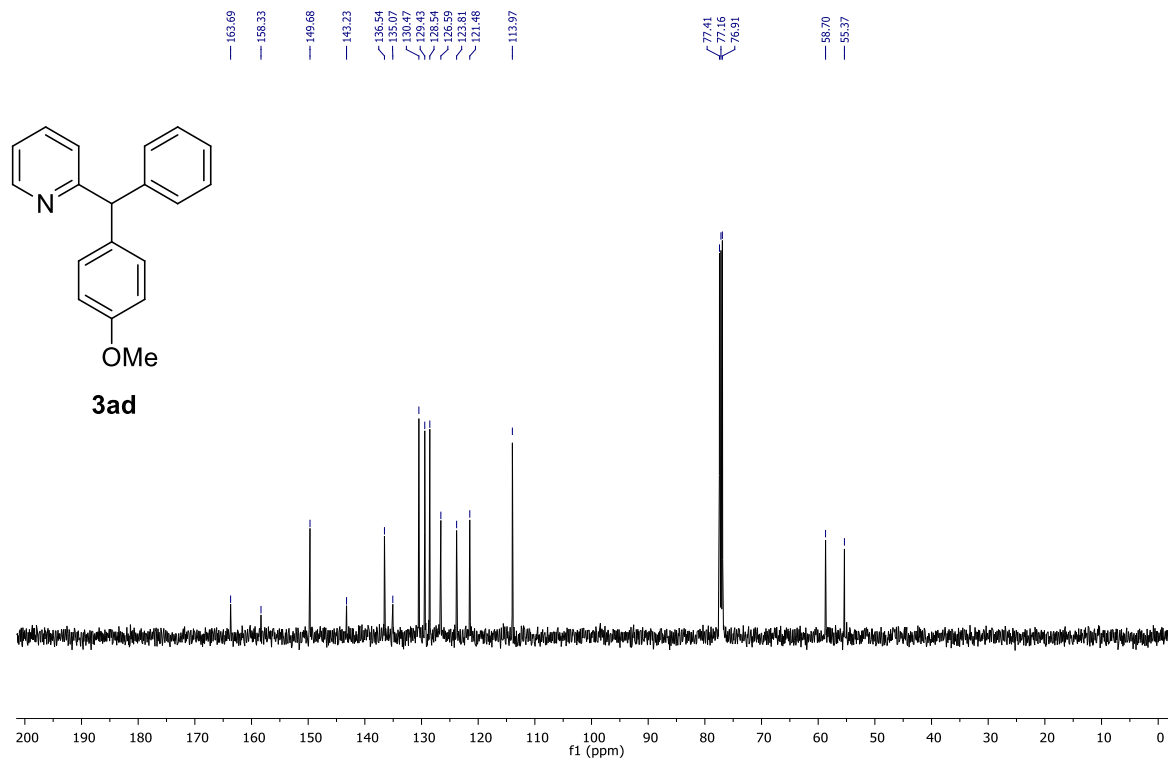

<sup>1</sup>H NMR of **3ae**

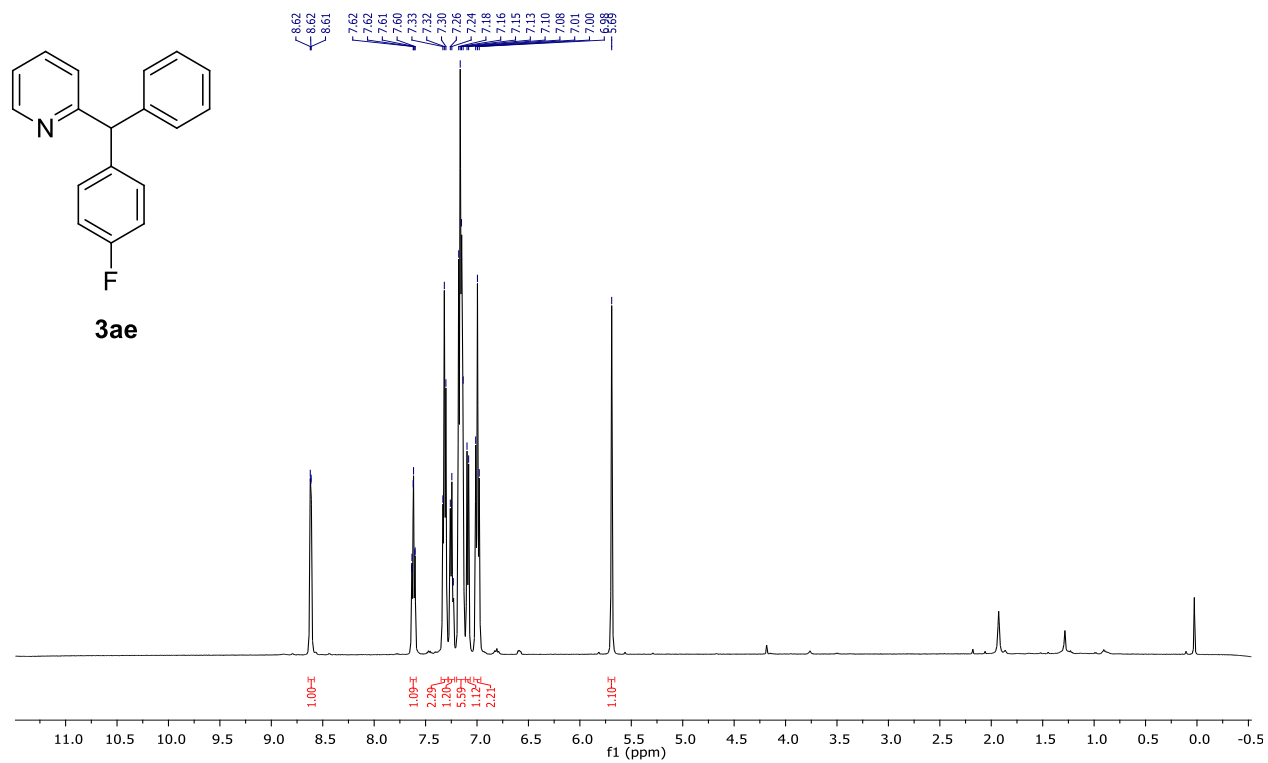

<sup>13</sup>C NMR of **3ae**

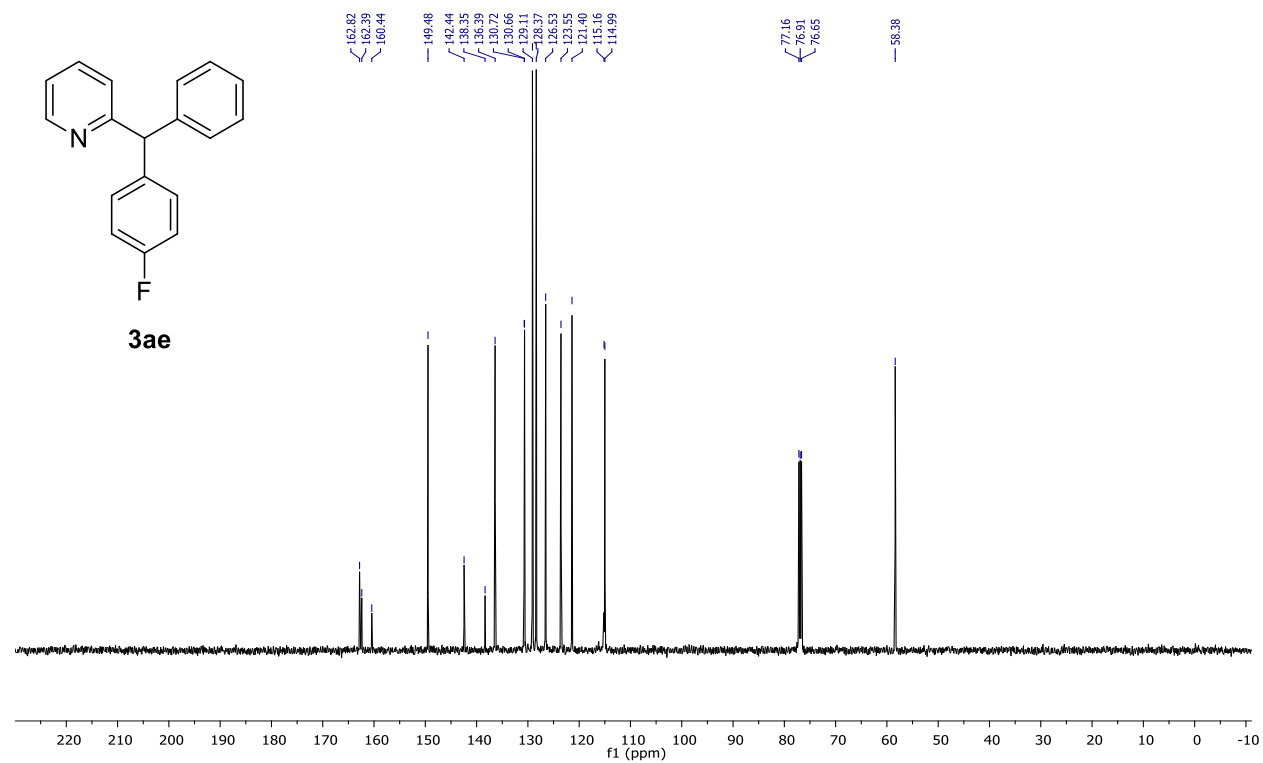

<sup>1</sup>H NMR of **3af**

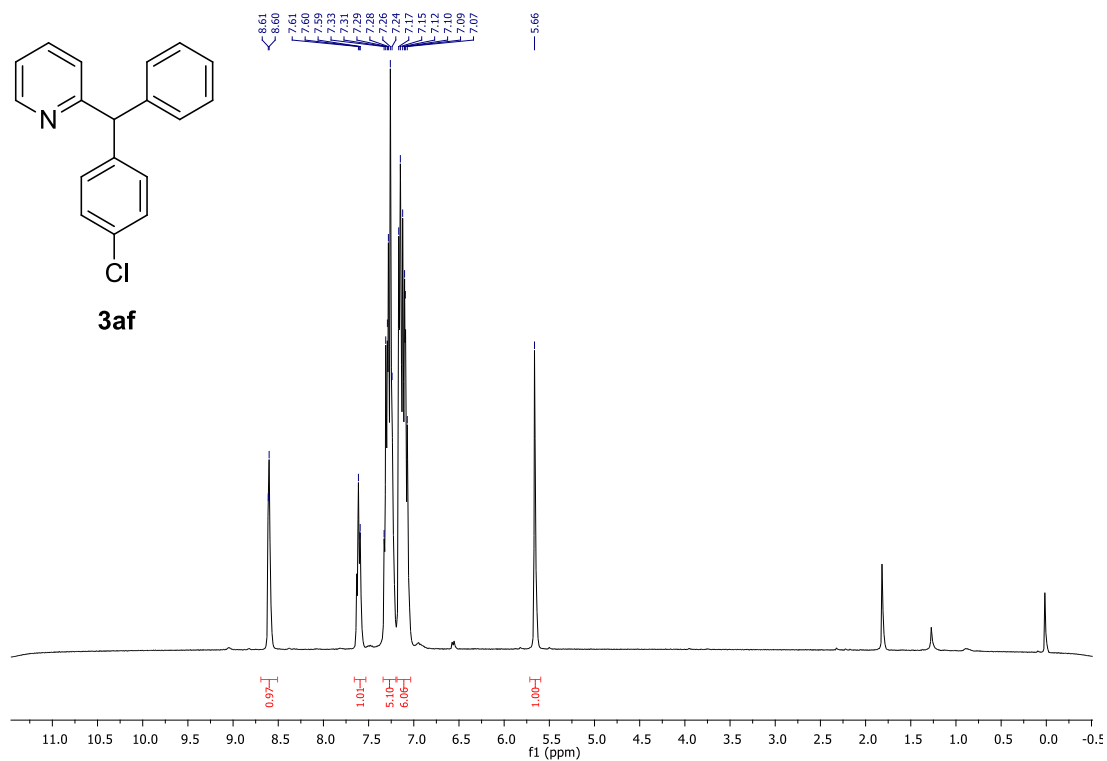

<sup>13</sup>C NMR of **3af**

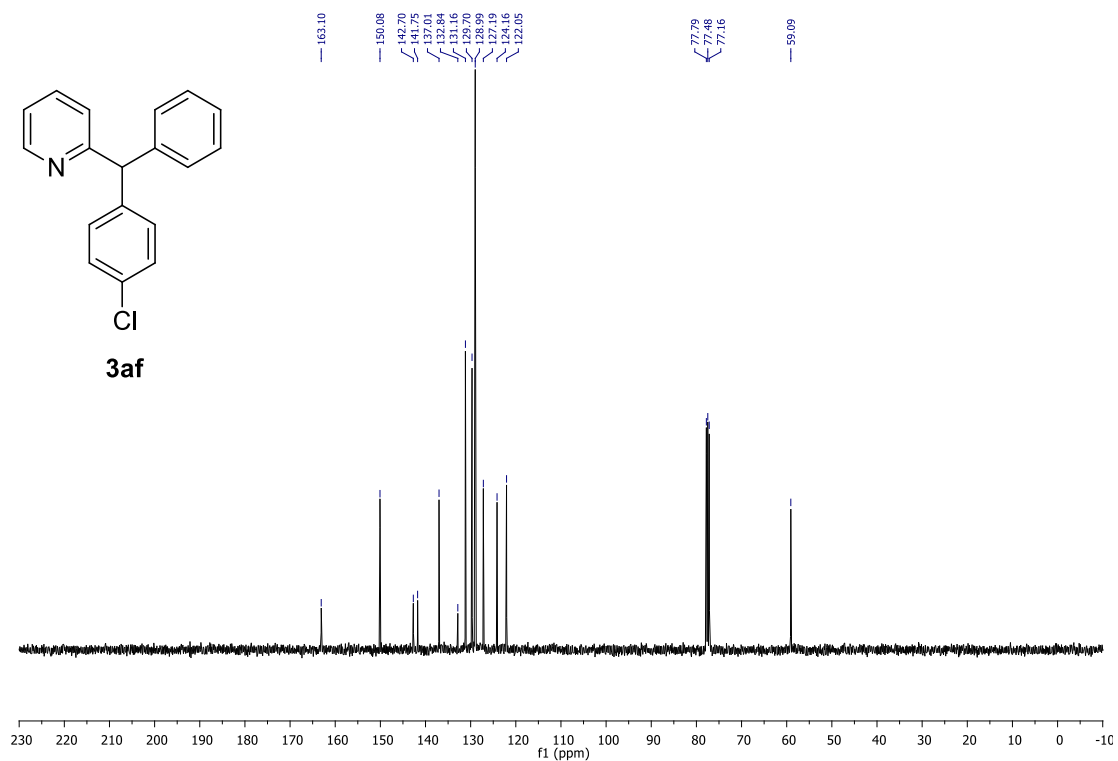

<sup>1</sup>H NMR of **3ag**

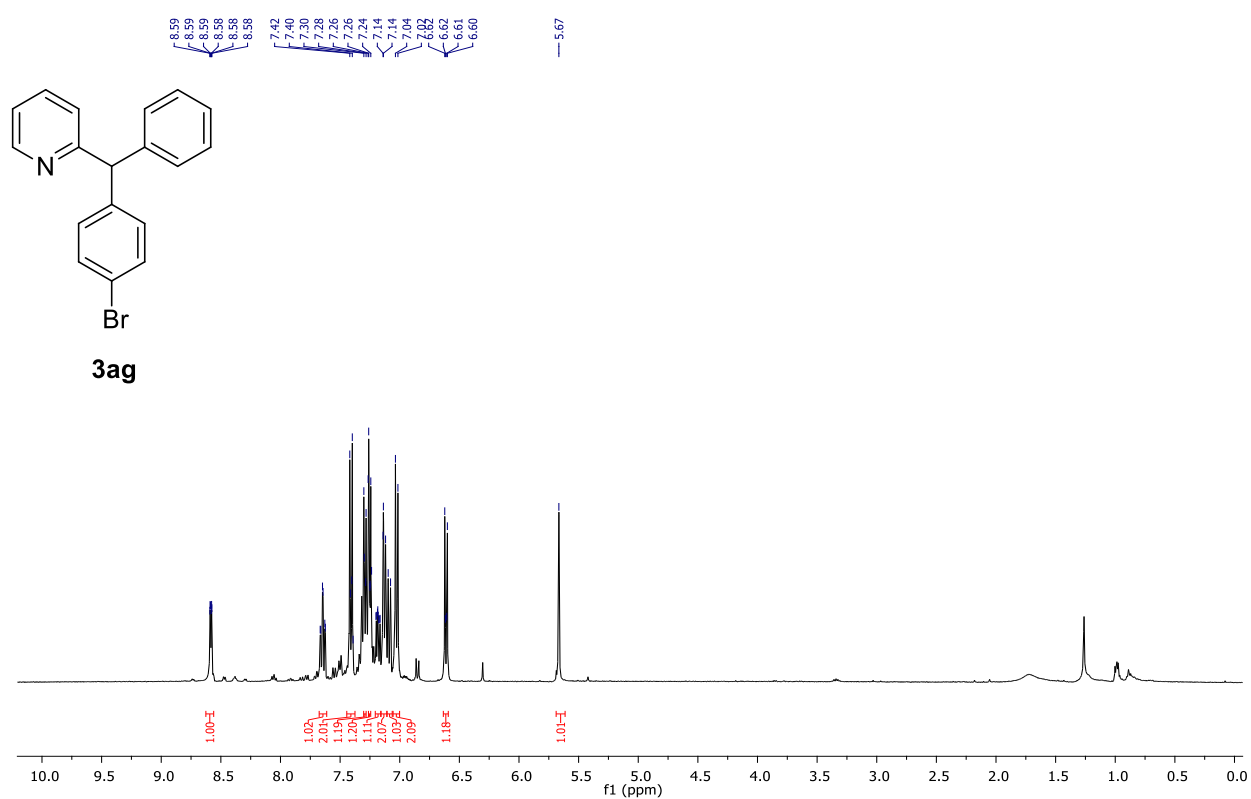

<sup>13</sup>C NMR of **3ag**

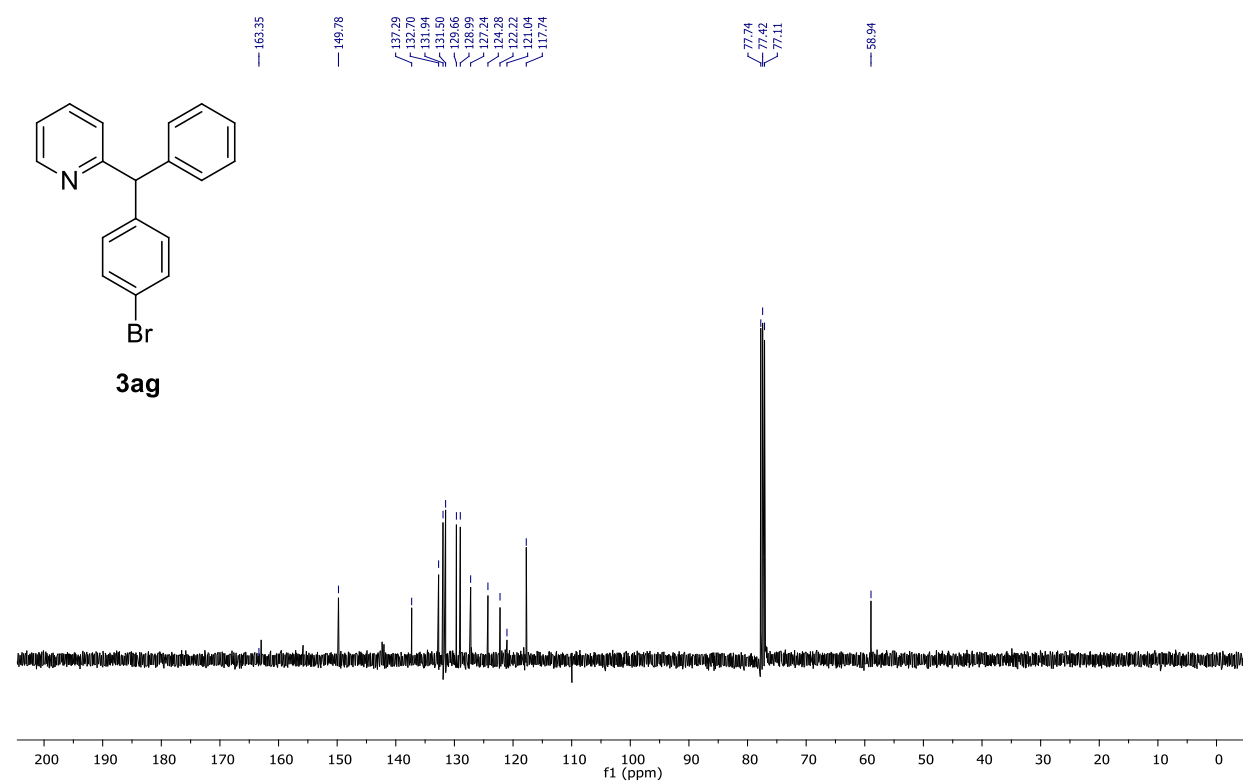

# <sup>1</sup>H NMR of **3ah**

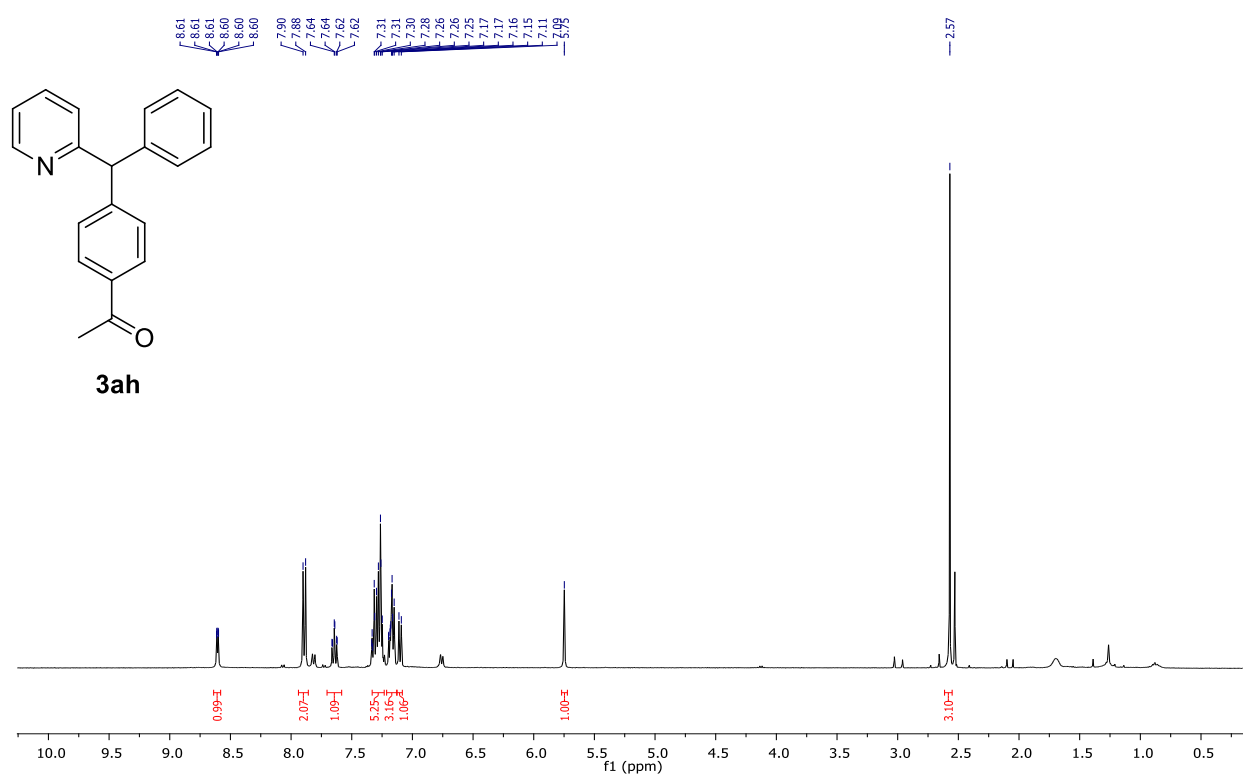

# <sup>13</sup>C NMR of **3ah**

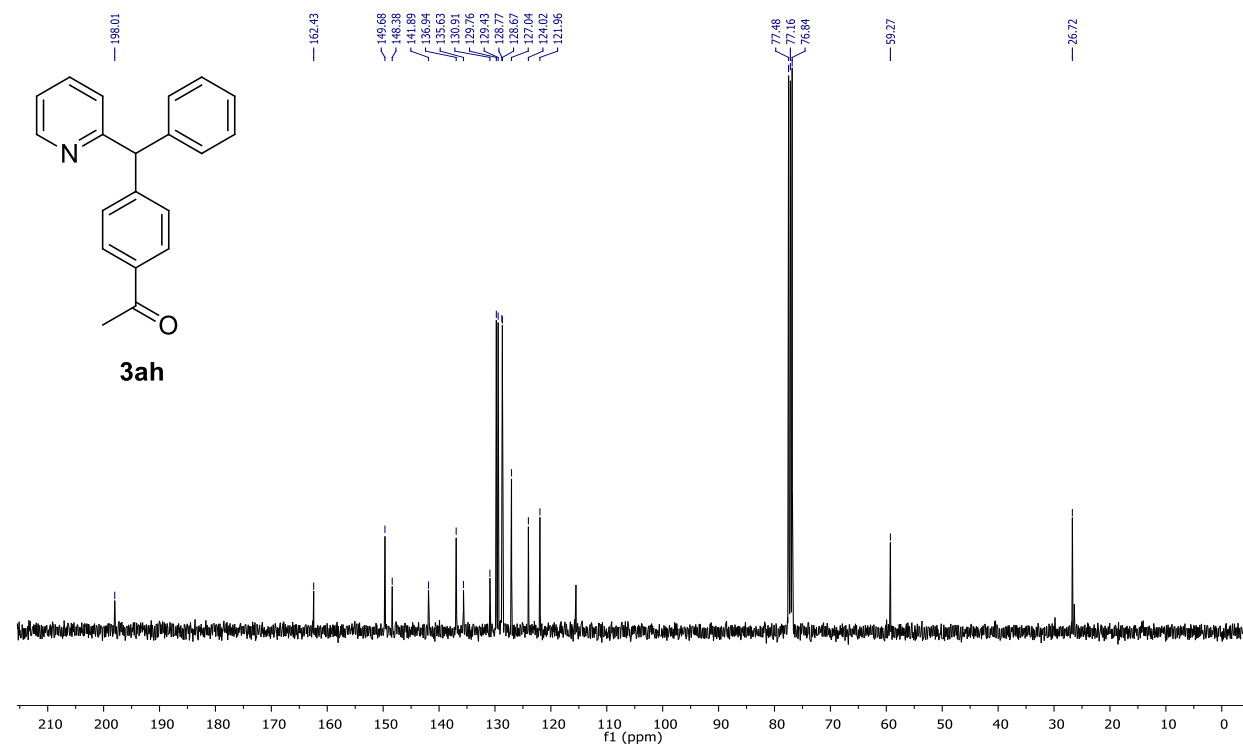

# <sup>1</sup>H NMR of **3ai**

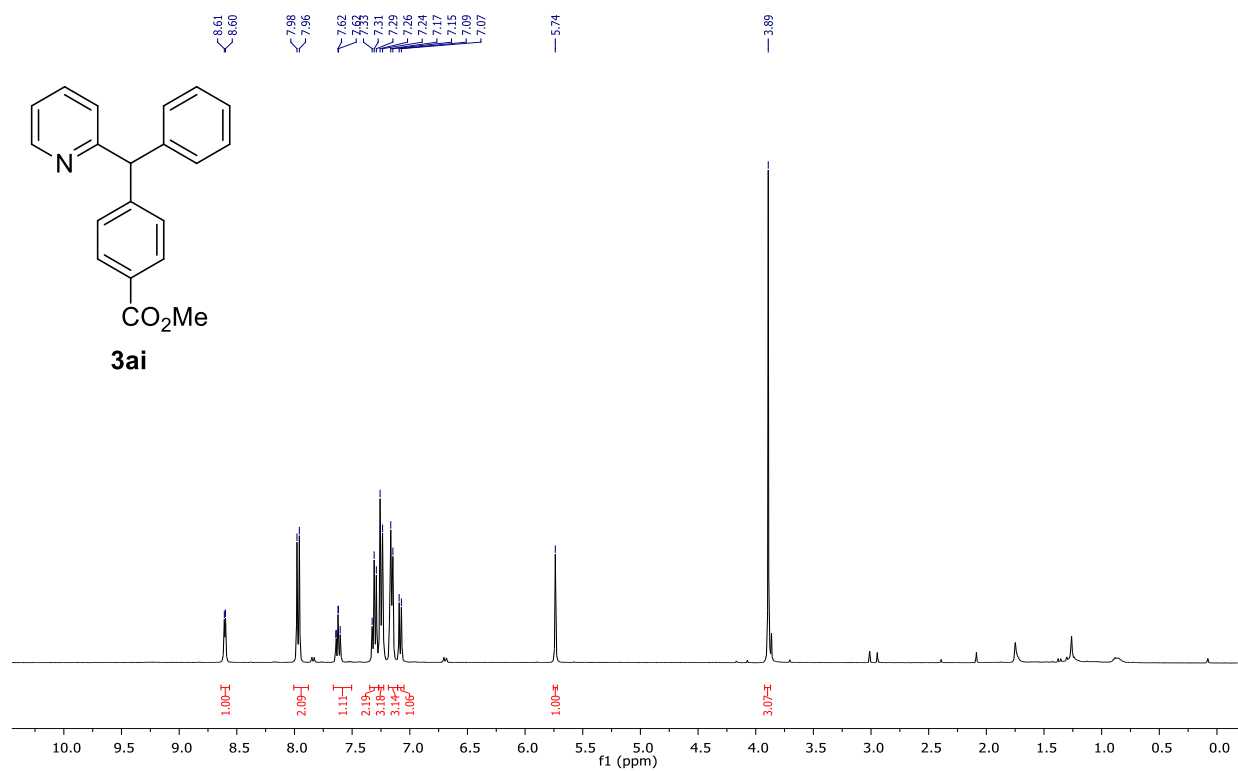

# <sup>13</sup>C NMR of **3ai**

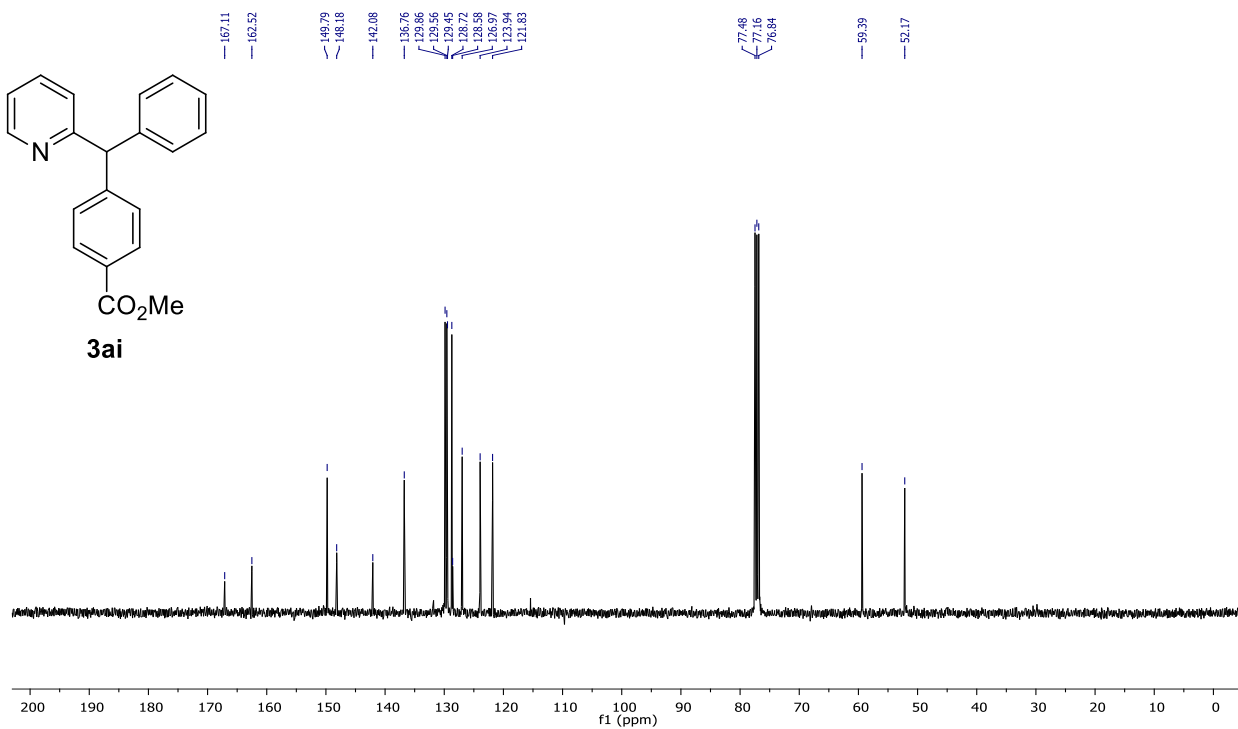

<sup>1</sup>H NMR of **3aj**

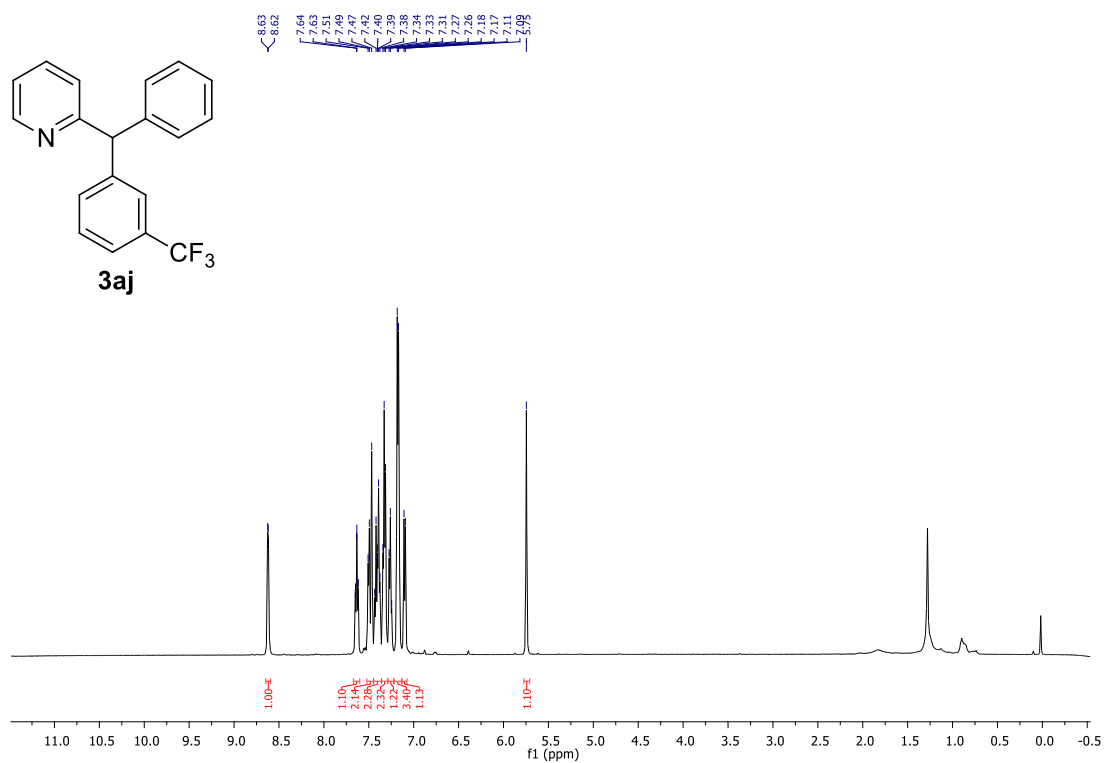

<sup>13</sup>C NMR of **3aj**

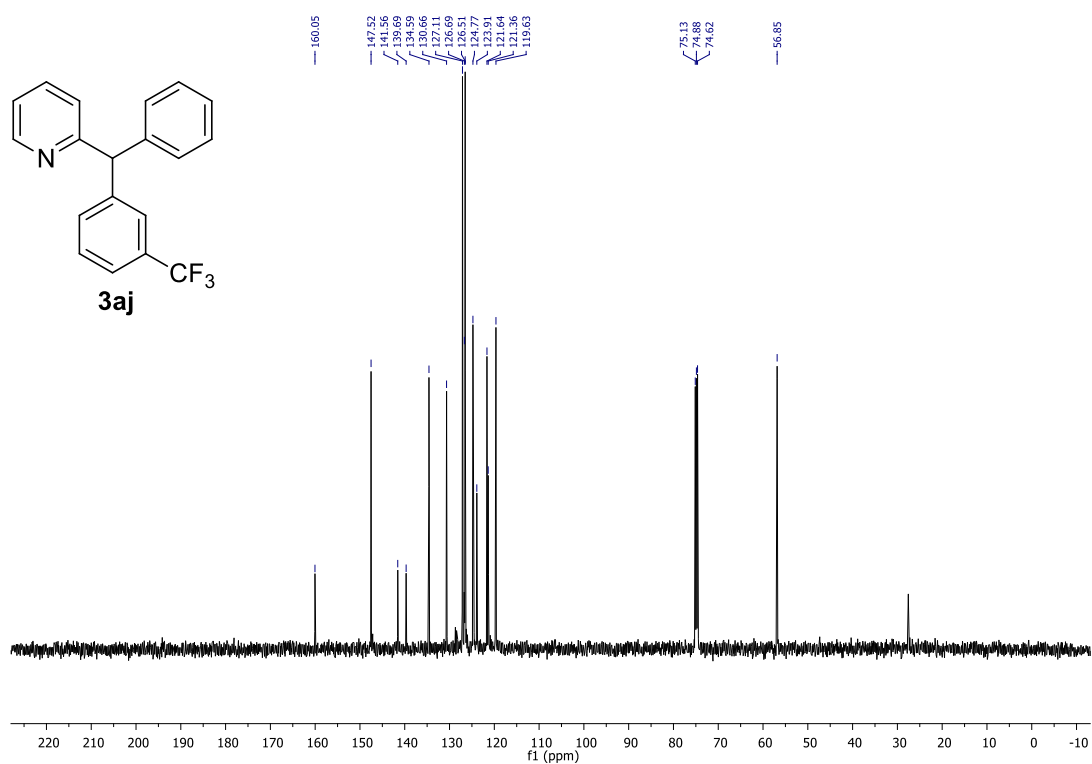

# <sup>1</sup>H NMR of **3ak**

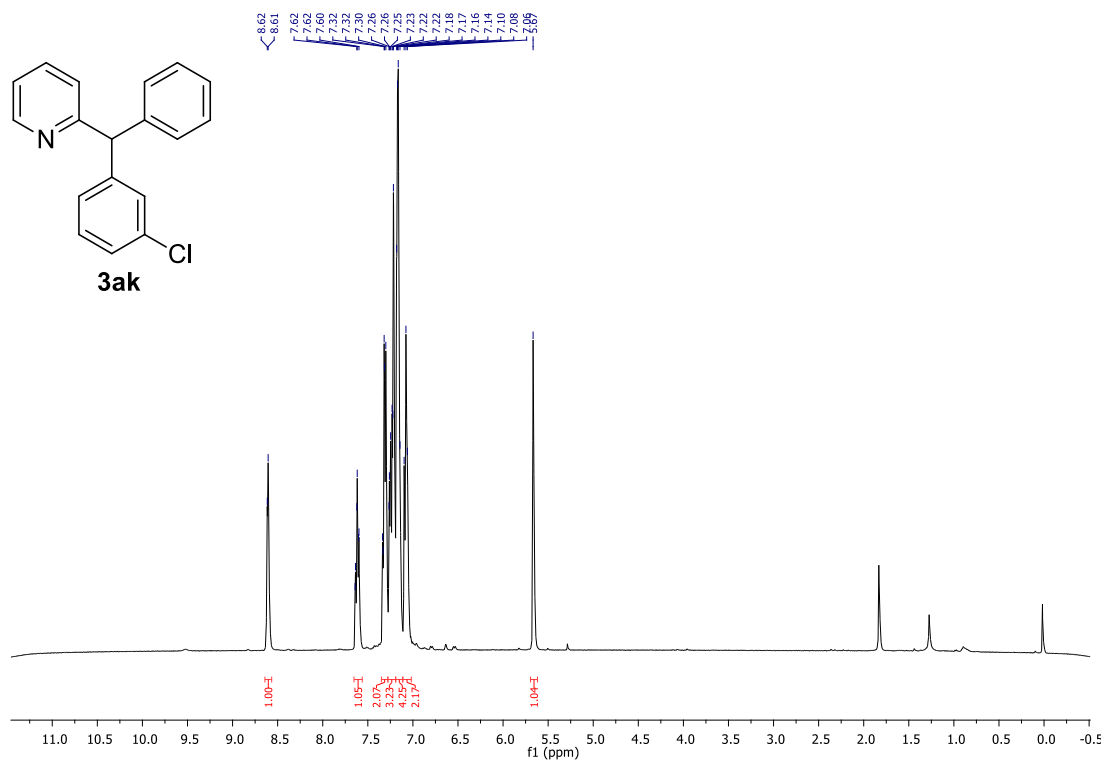

# <sup>13</sup>C NMR of **3ak**

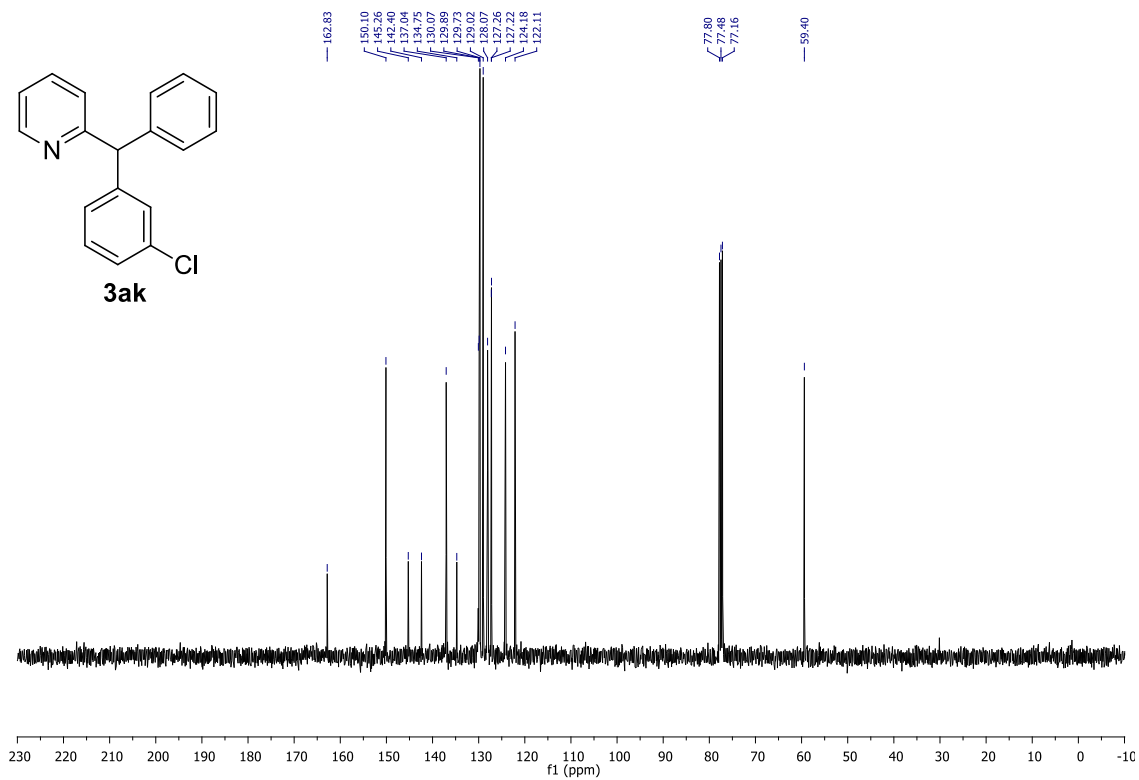

# <sup>1</sup>H NMR of **3al**

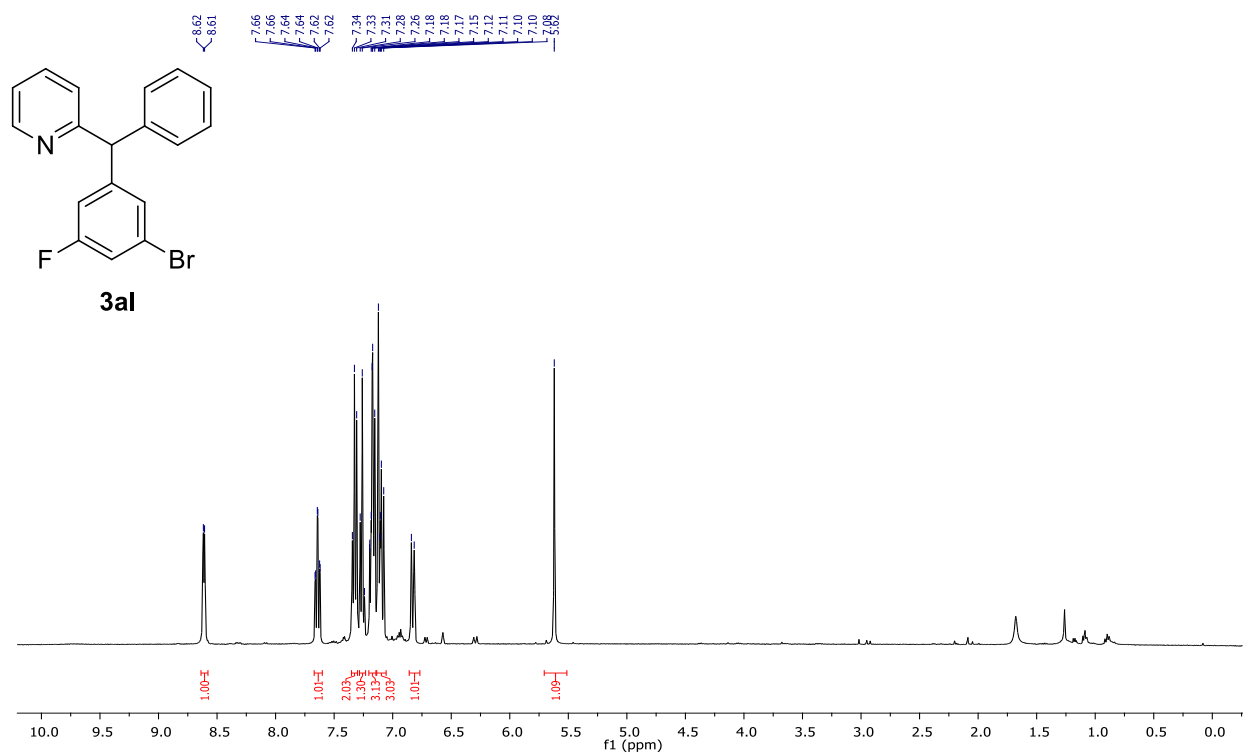

# <sup>13</sup>C NMR of **3al**

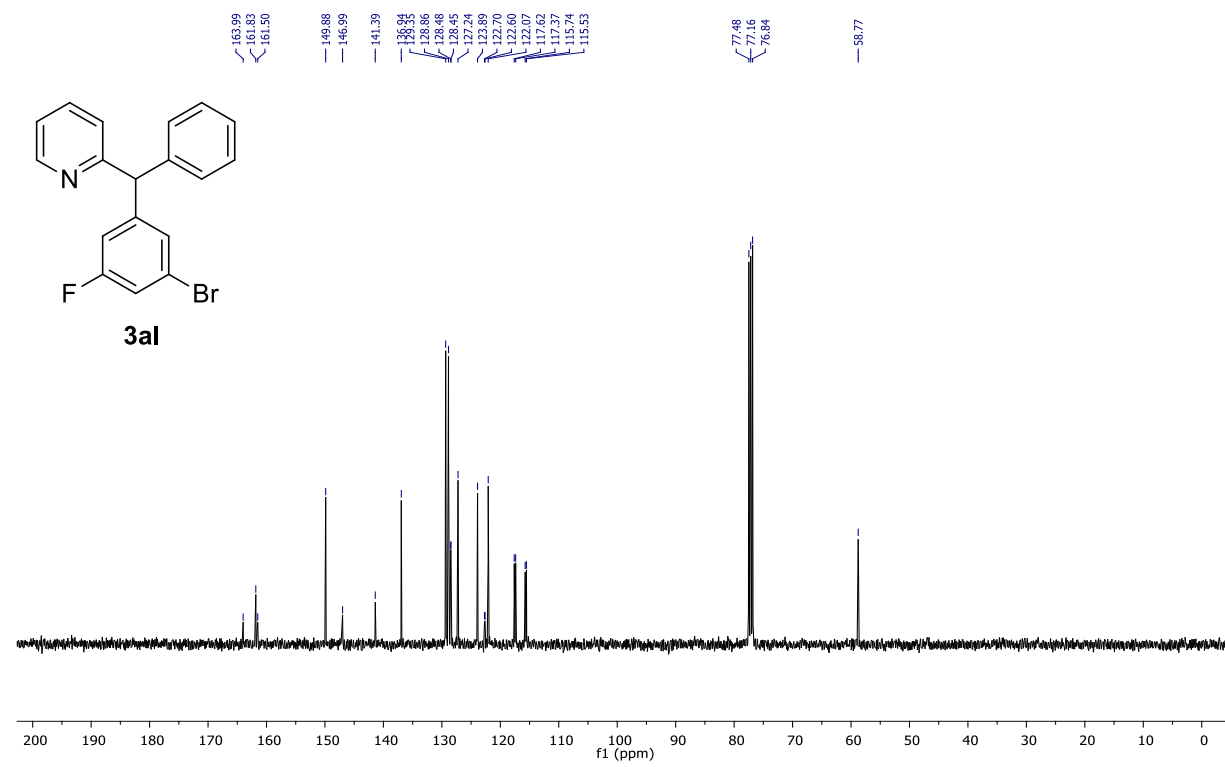

<sup>1</sup>H NMR of **3am**

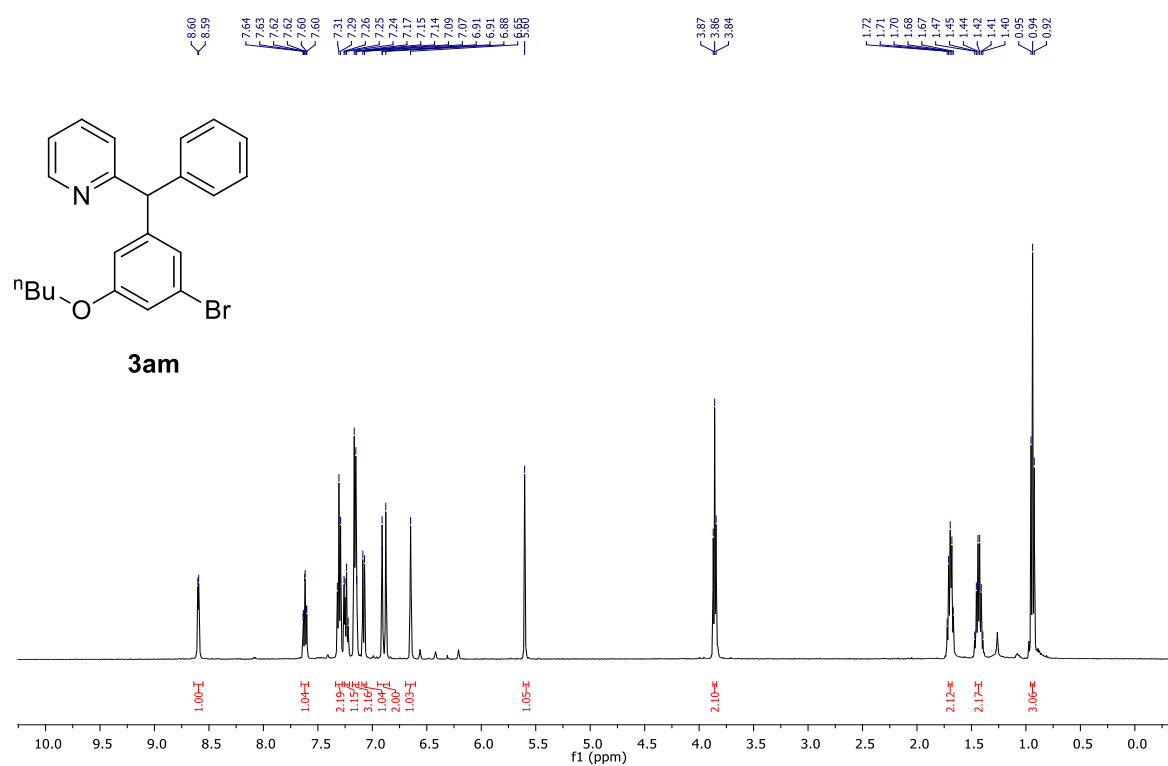

<sup>13</sup>C NMR of **3am**

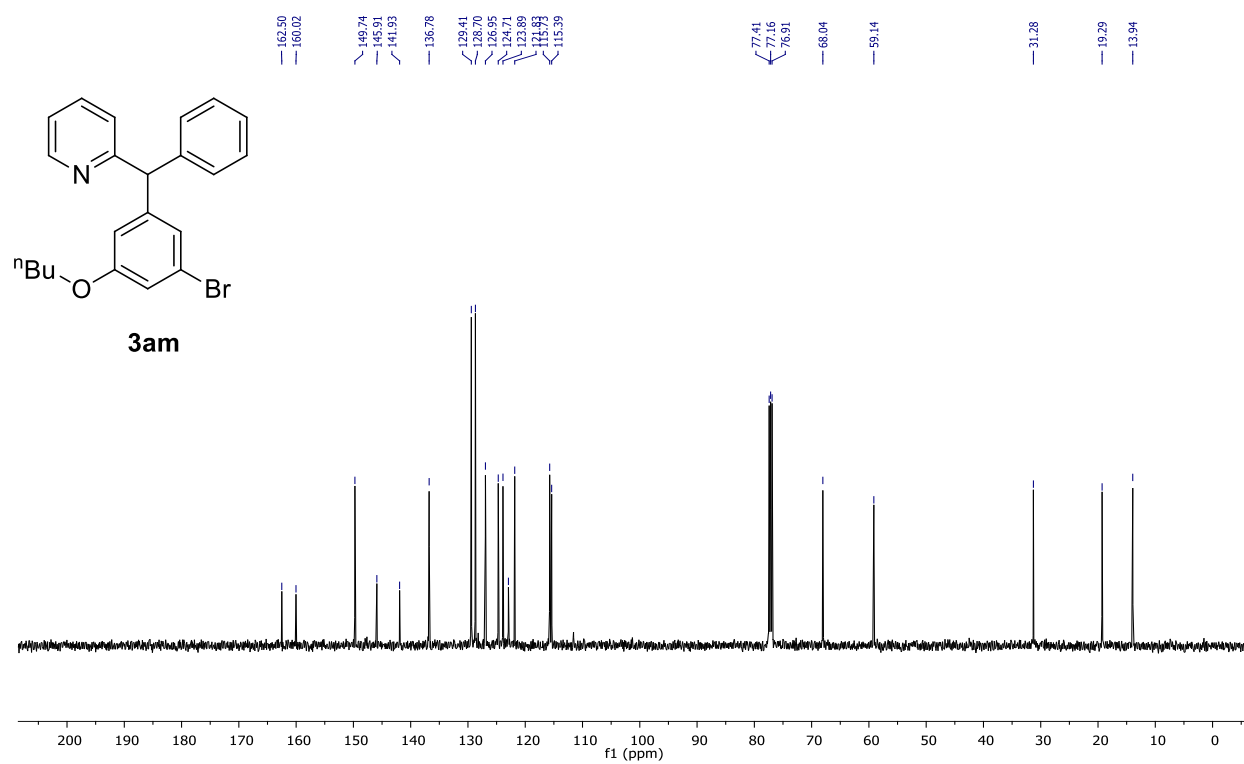

# <sup>1</sup>H NMR of **3an**

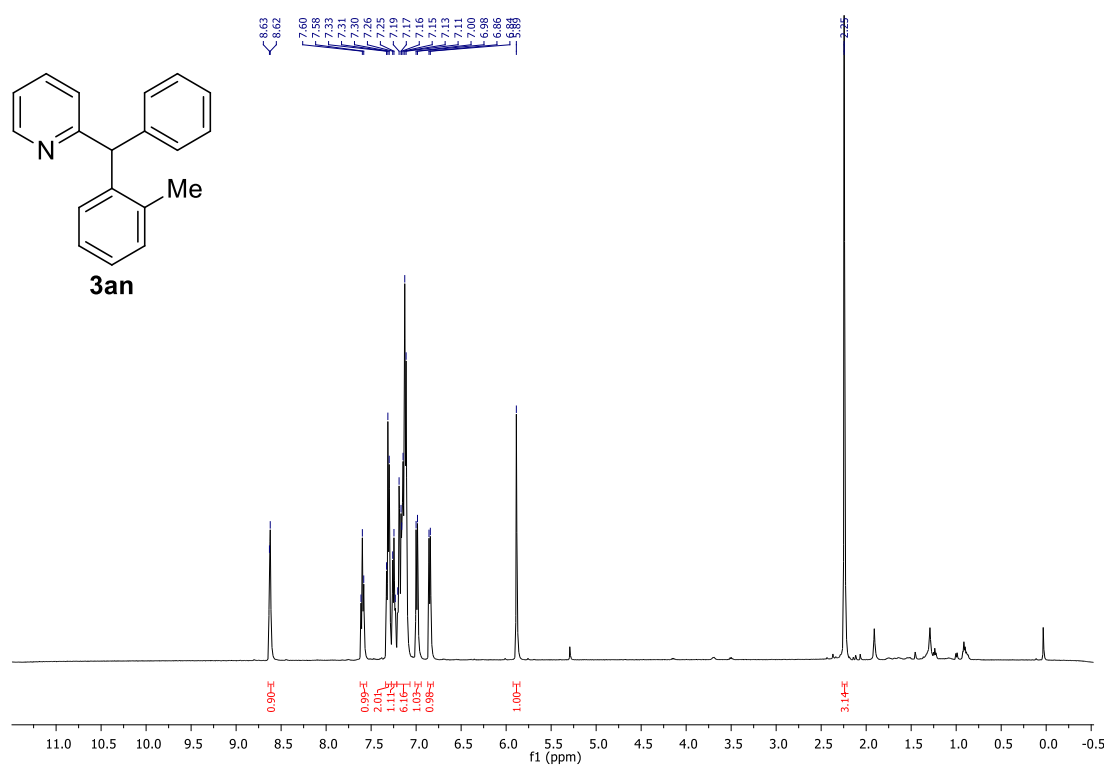

# <sup>13</sup>C NMR of **3an**

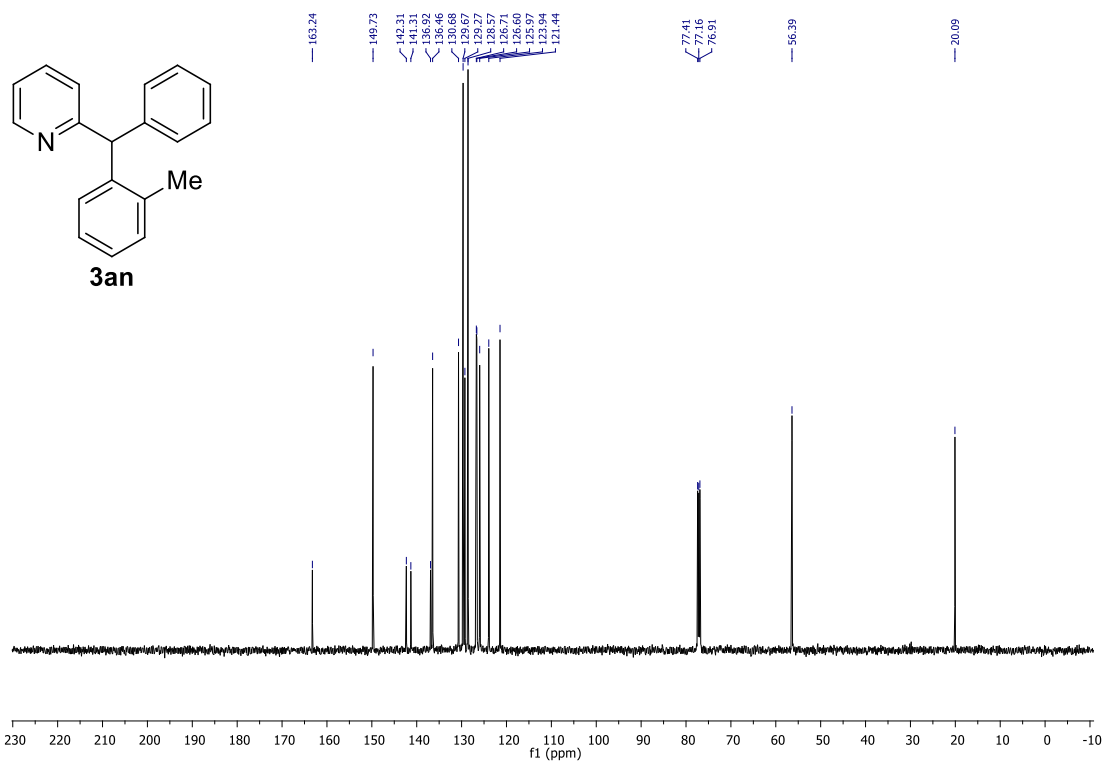

# <sup>1</sup>H NMR of **3ao**

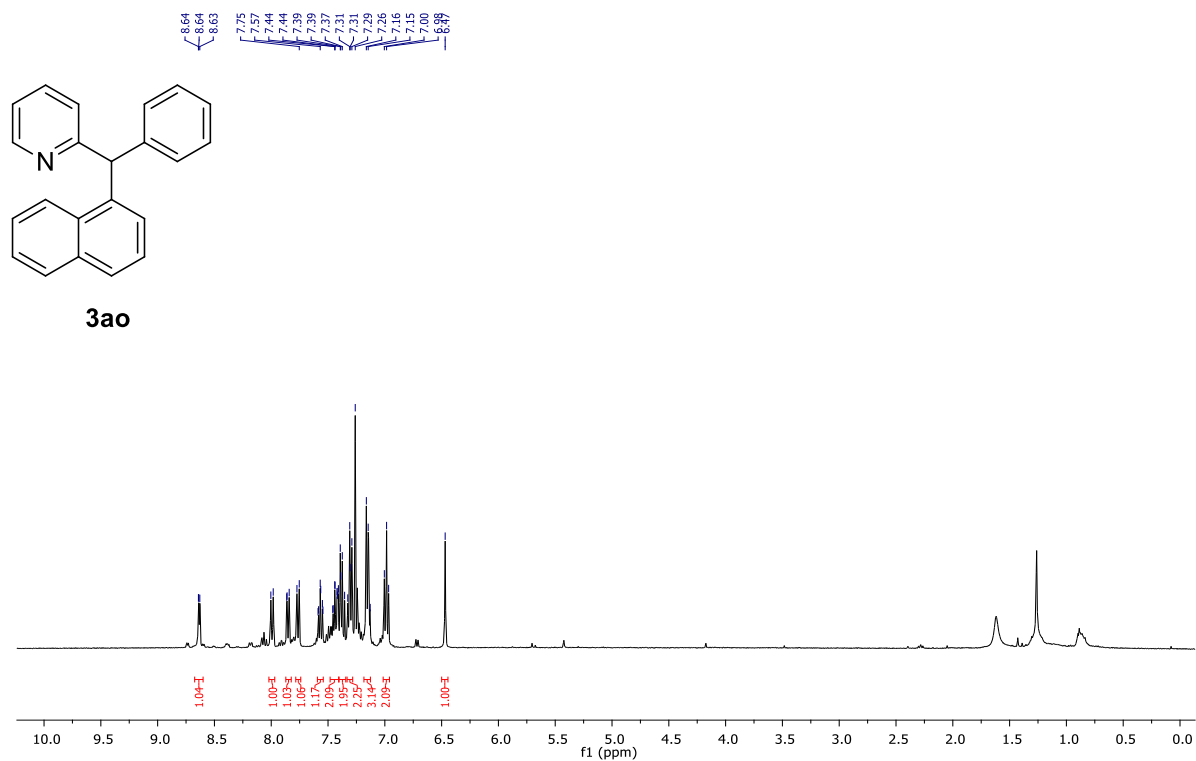

# <sup>13</sup>C NMR of **3ao**

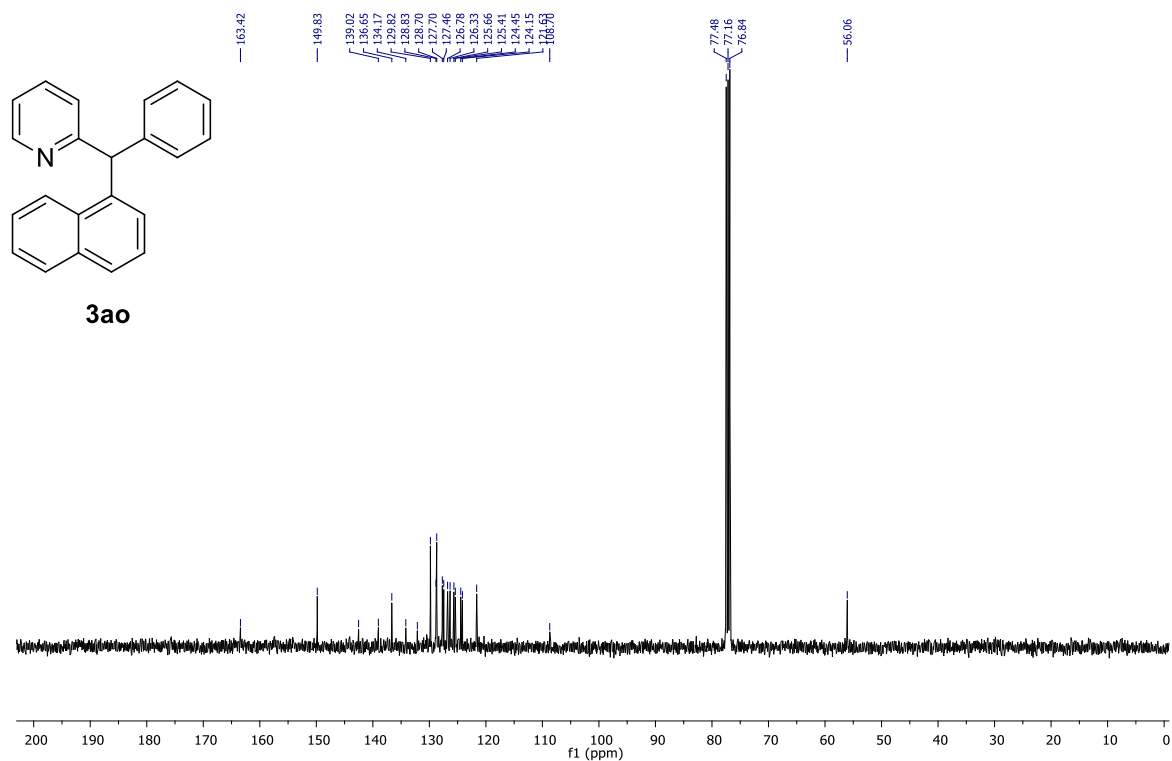

# <sup>1</sup>H NMR of **3ap**

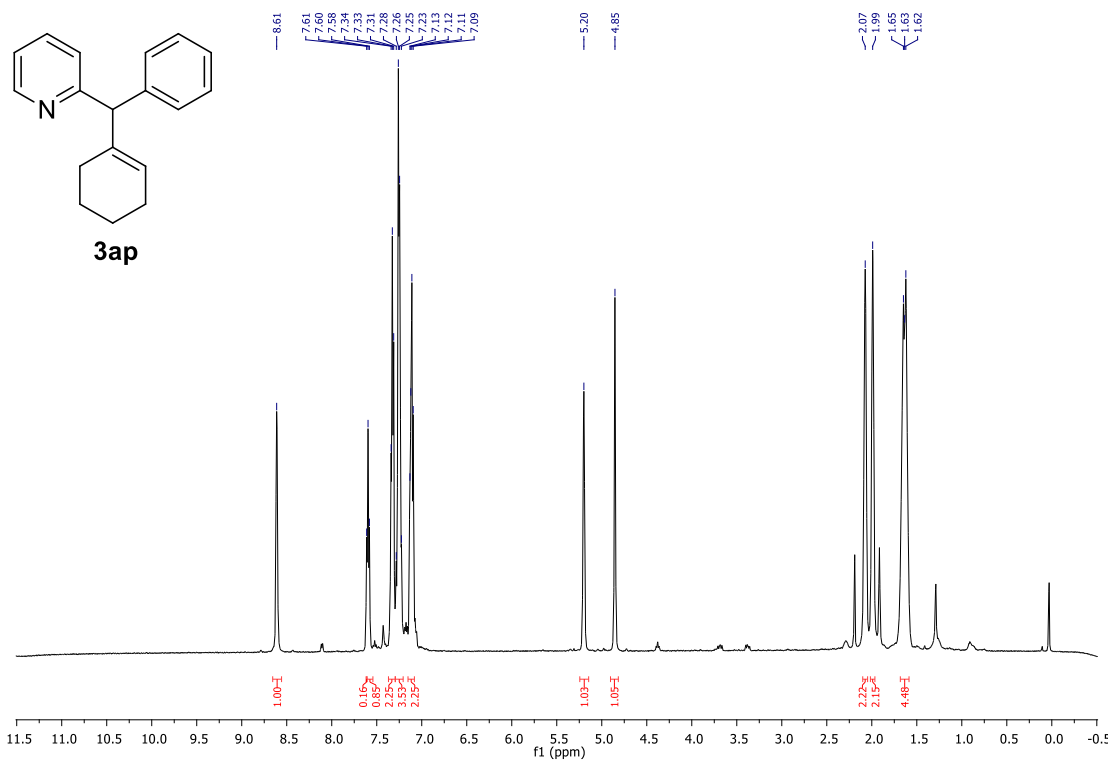

# <sup>13</sup>C NMR of **3ap**

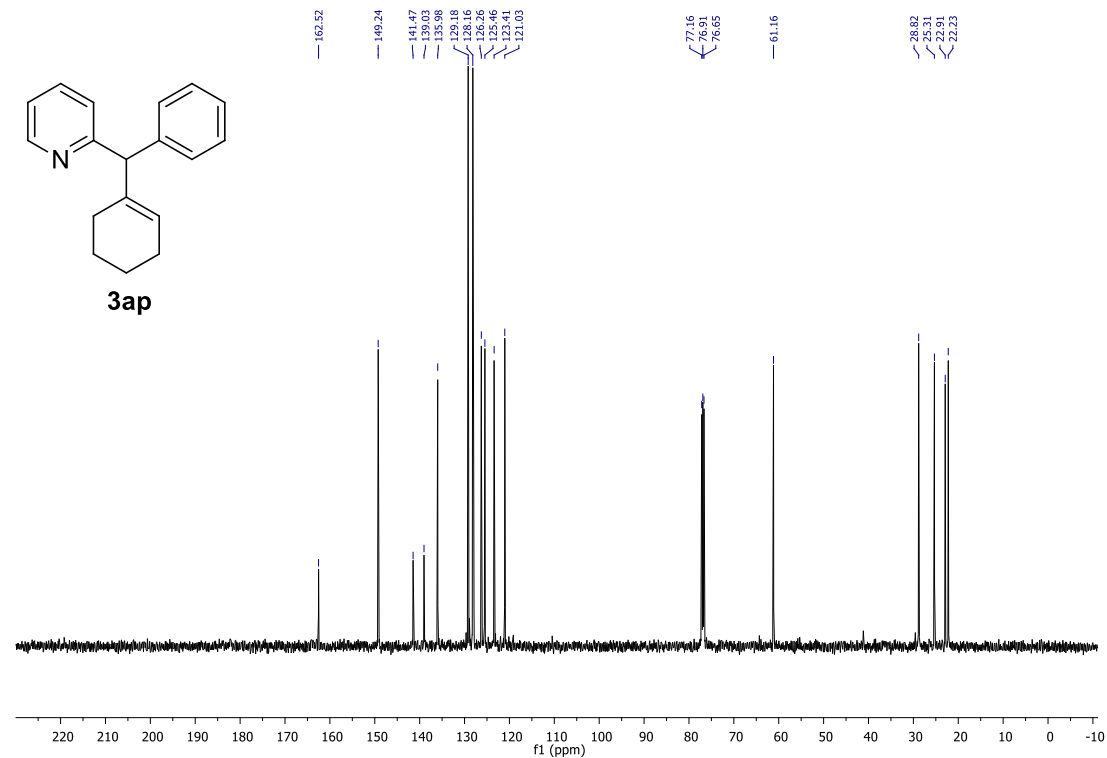

<sup>1</sup>H NMR of **3ea**

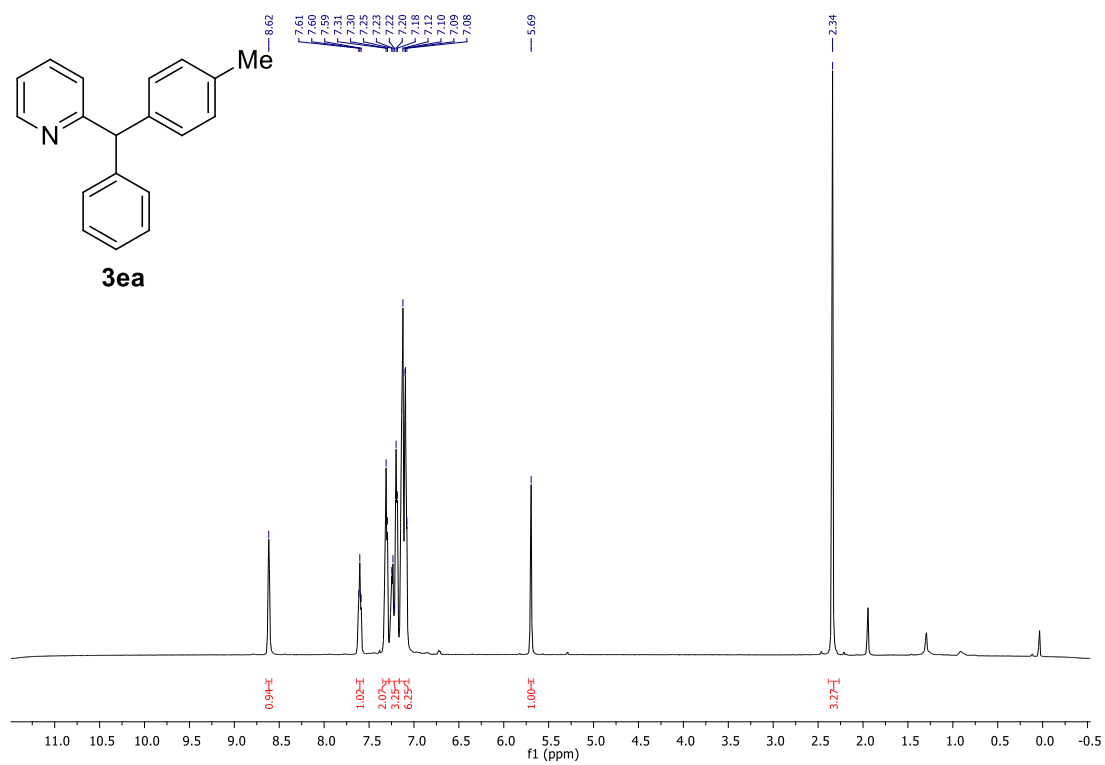

<sup>13</sup>C NMR of **3ea**

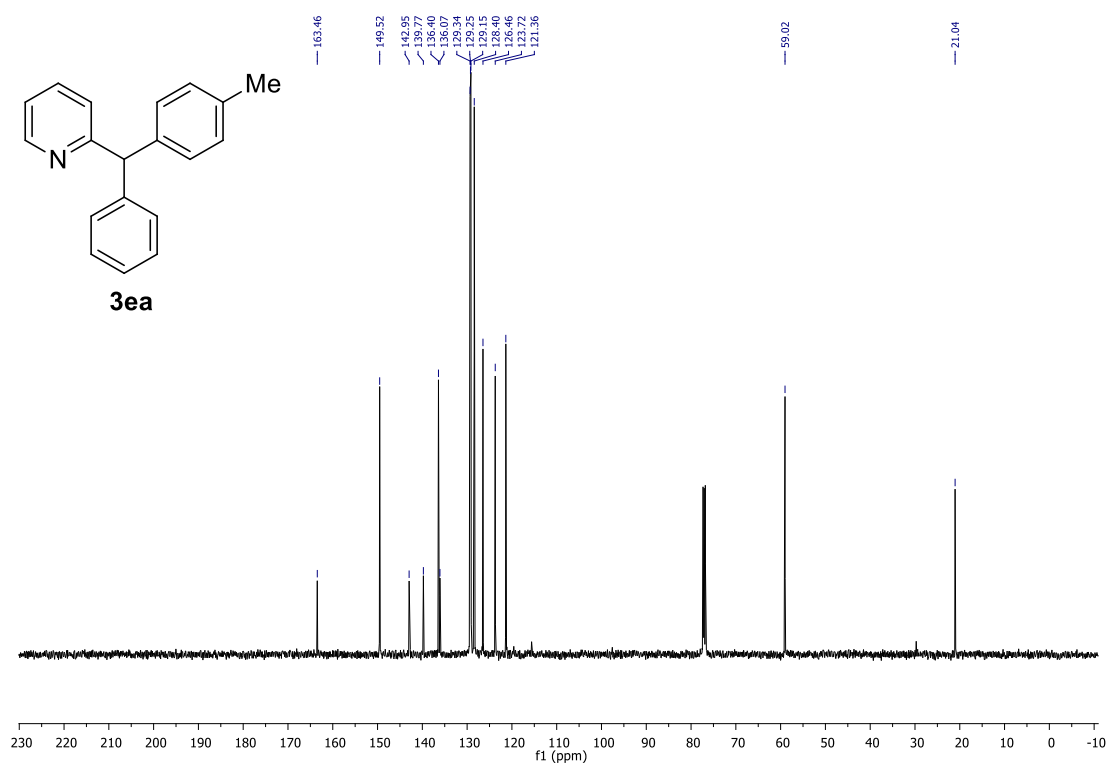

<sup>1</sup>H NMR of **3fa**

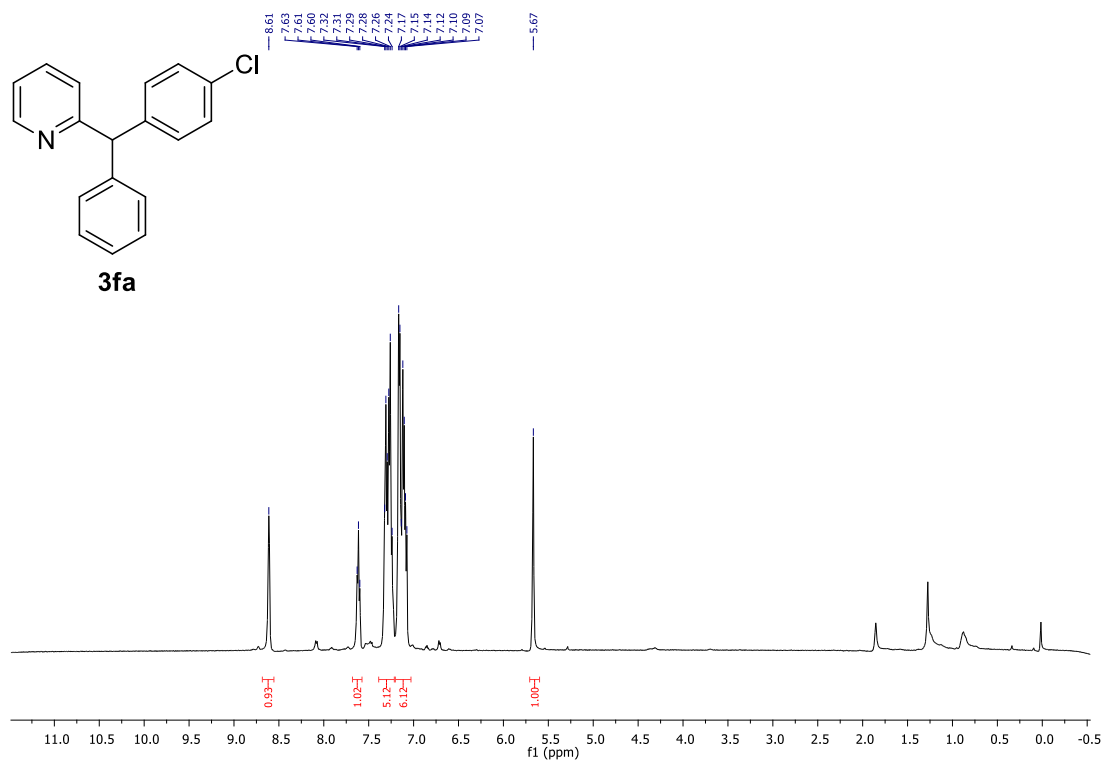

<sup>13</sup>C NMR of **3fa**

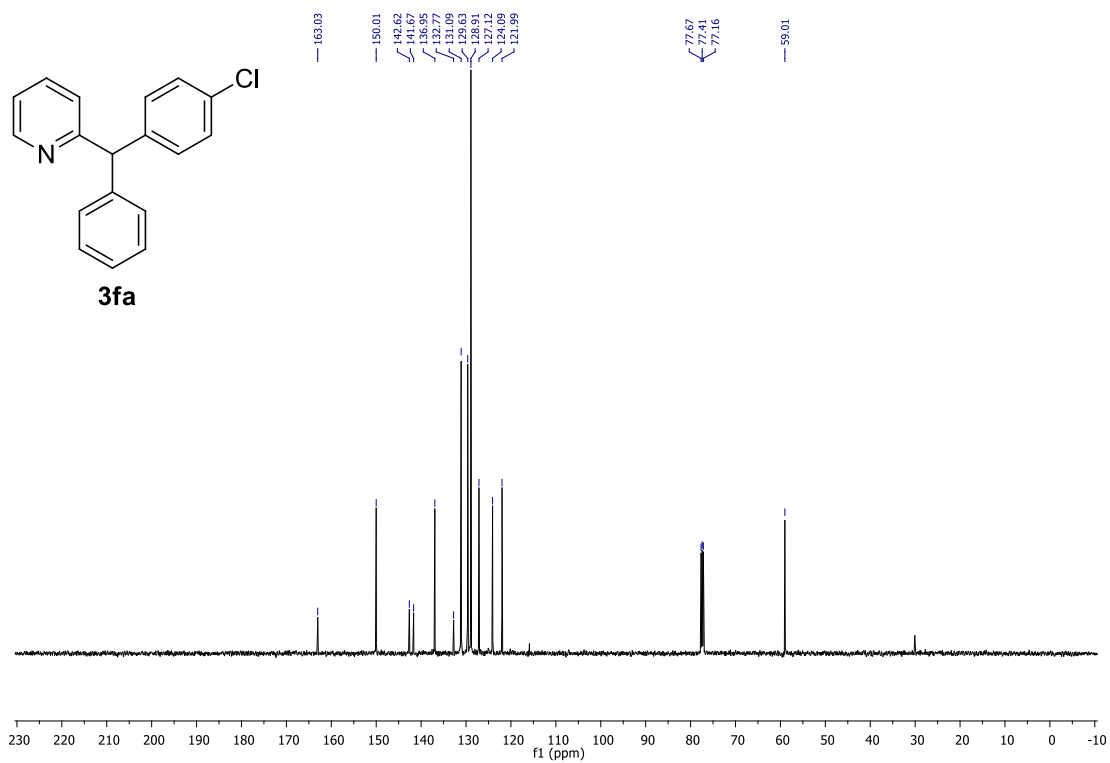

<sup>1</sup>H NMR of **3ga**

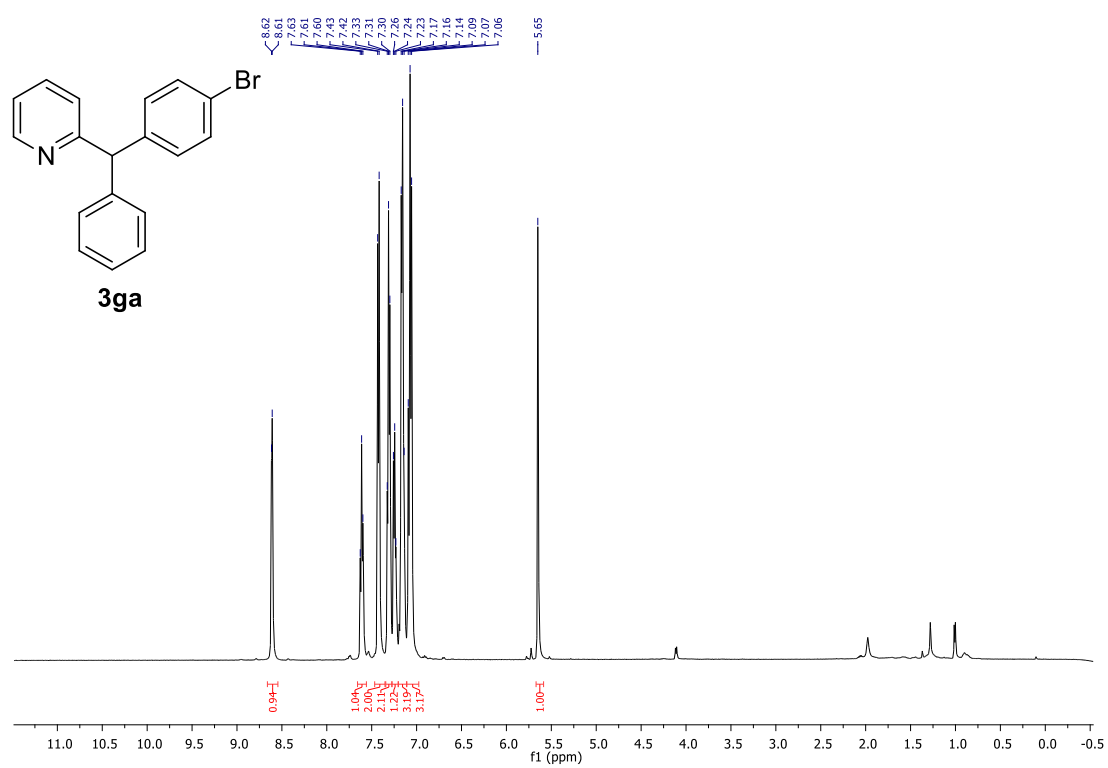

<sup>13</sup>C NMR of **3ga**

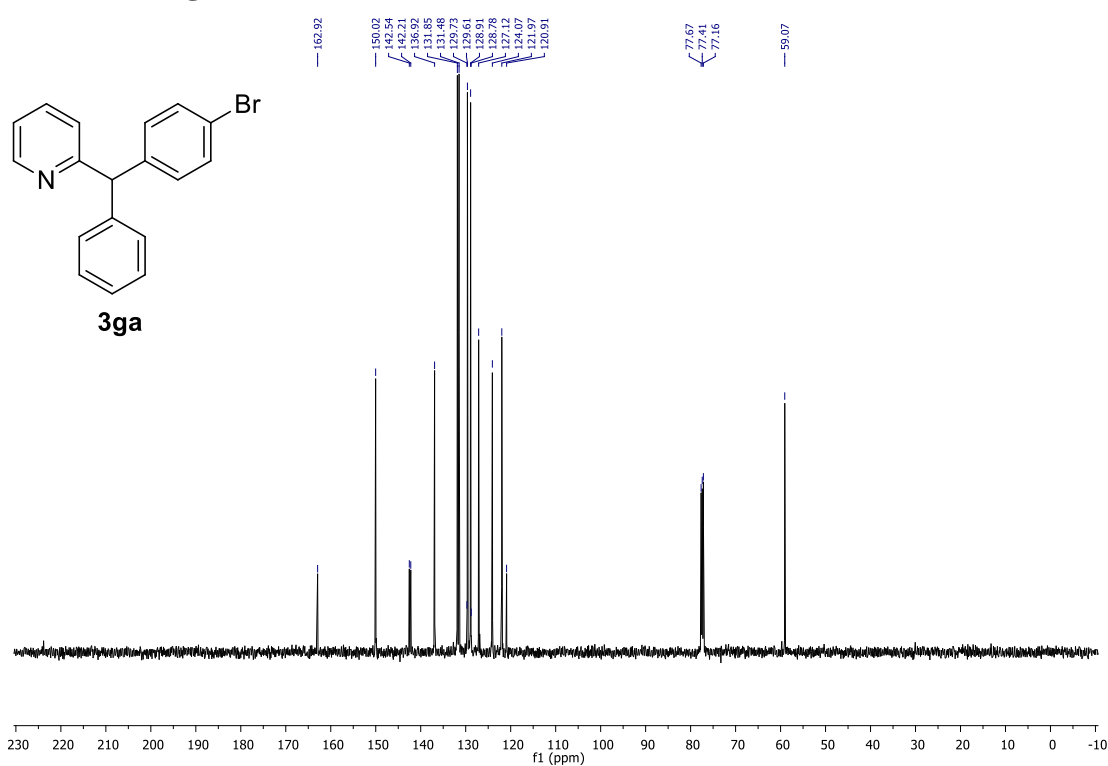

<sup>1</sup>H NMR of **3ha**

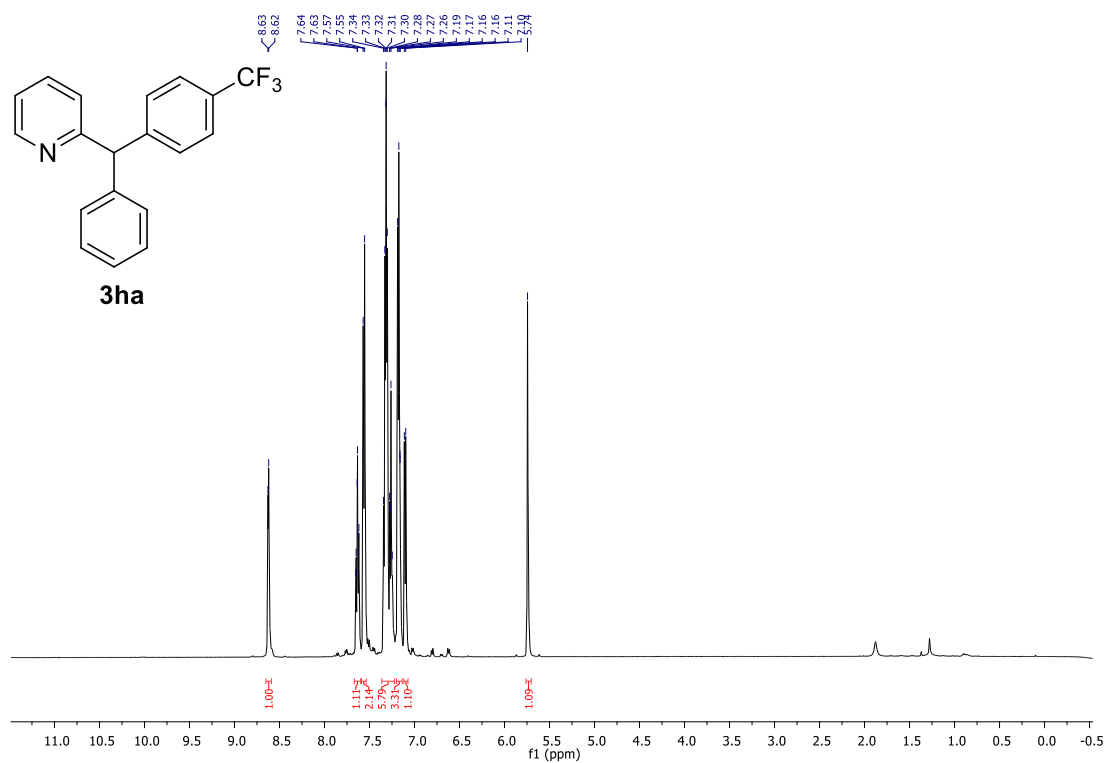

<sup>13</sup>C NMR of **3ha**

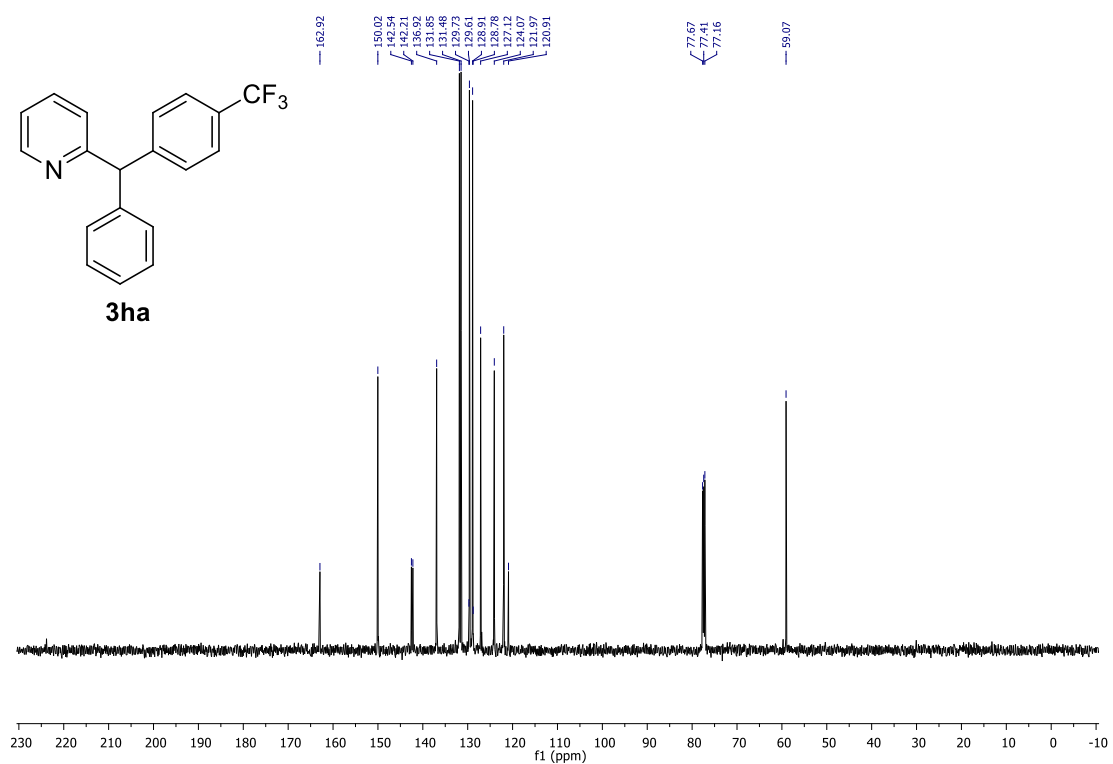

<sup>1</sup>H NMR of **3ia**

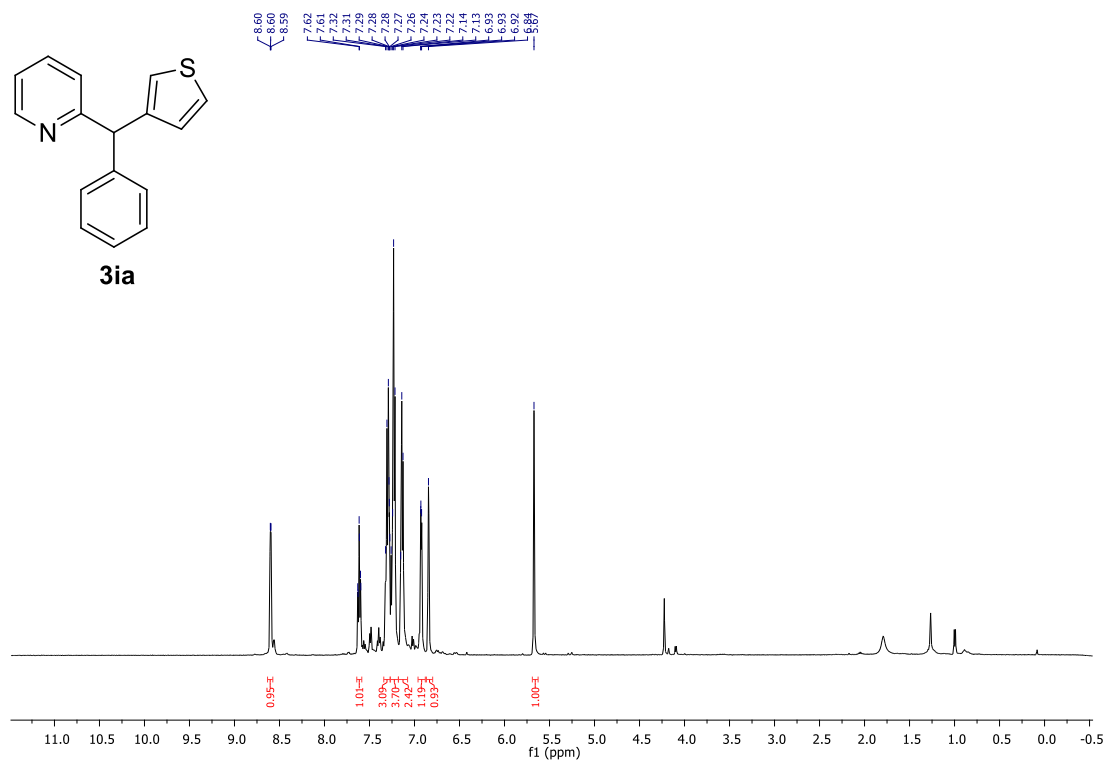

<sup>13</sup>C NMR of **3ia**

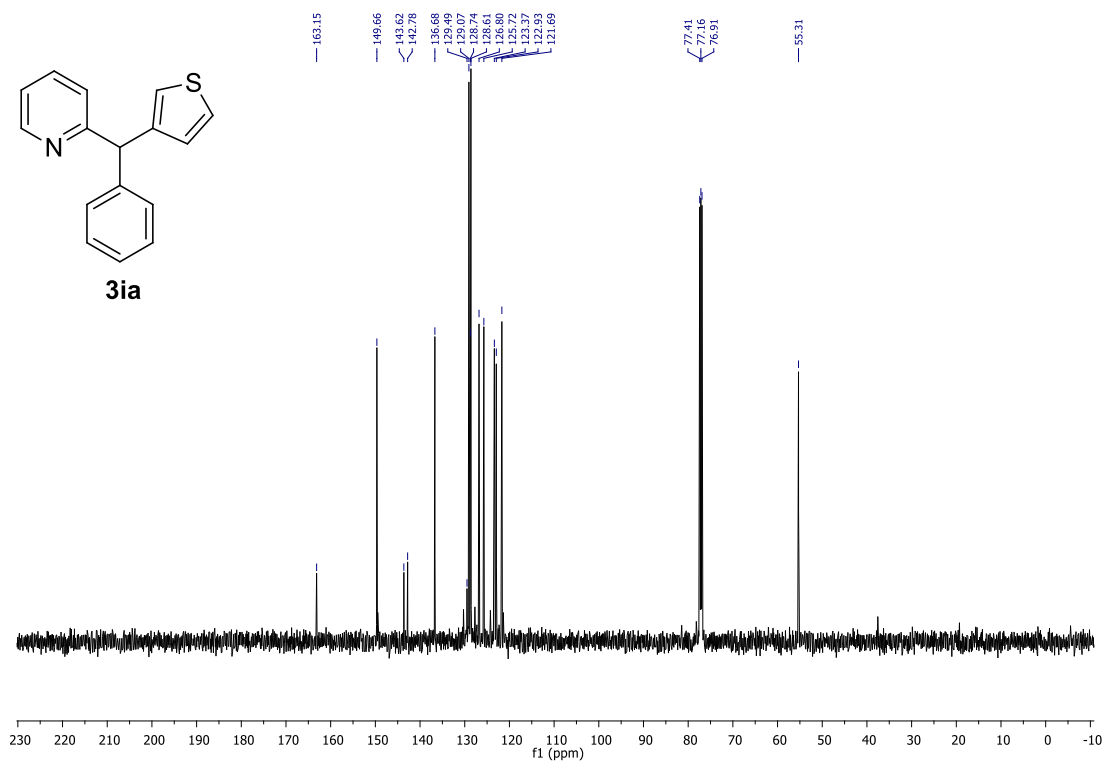

<sup>1</sup>H NMR of **3ja**

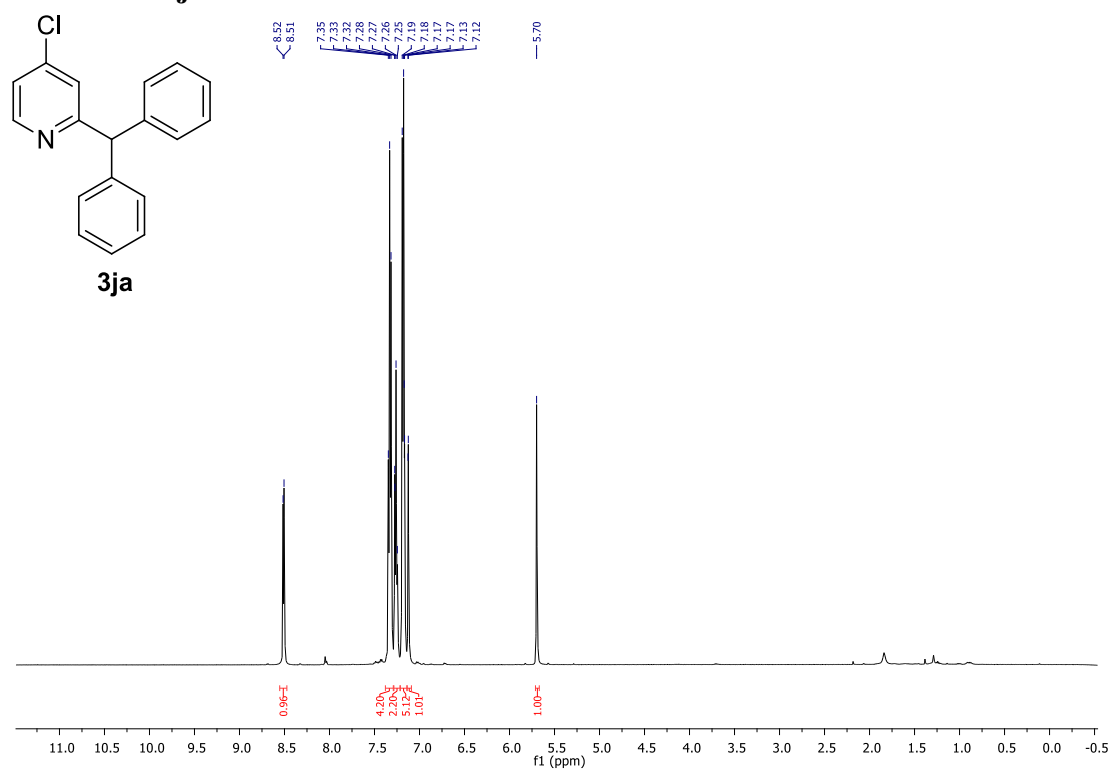

<sup>13</sup>C NMR of **3ja**

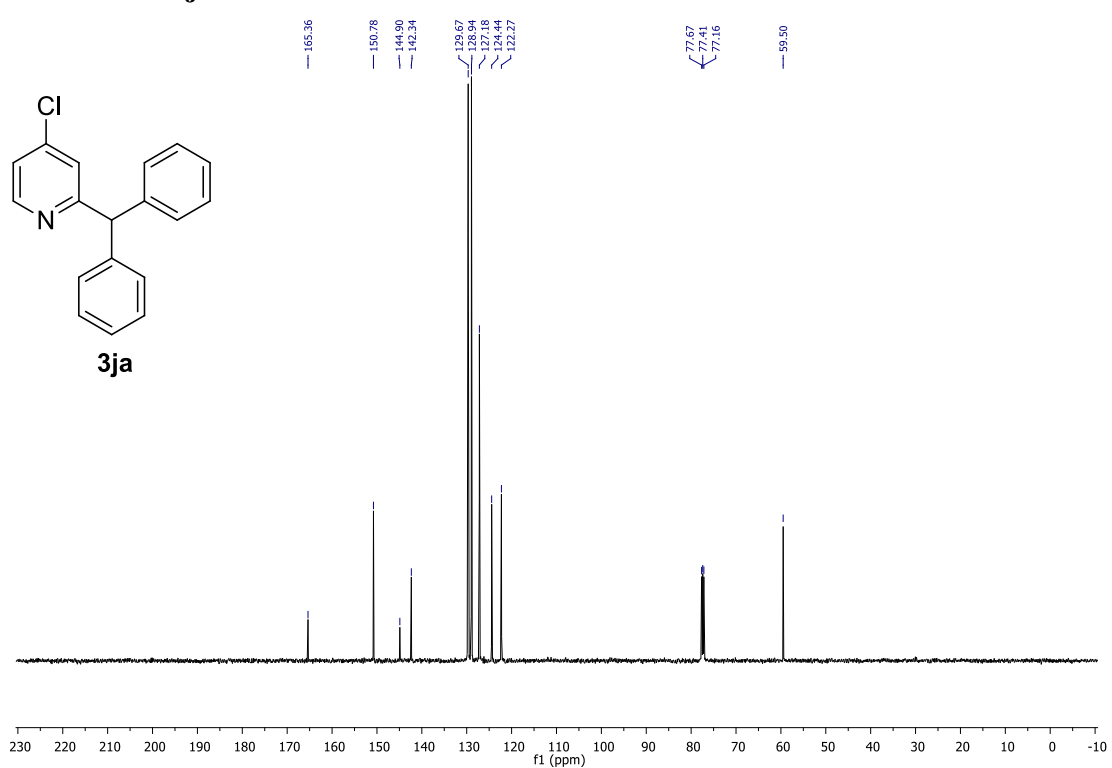

<sup>1</sup>H NMR of **3ka**

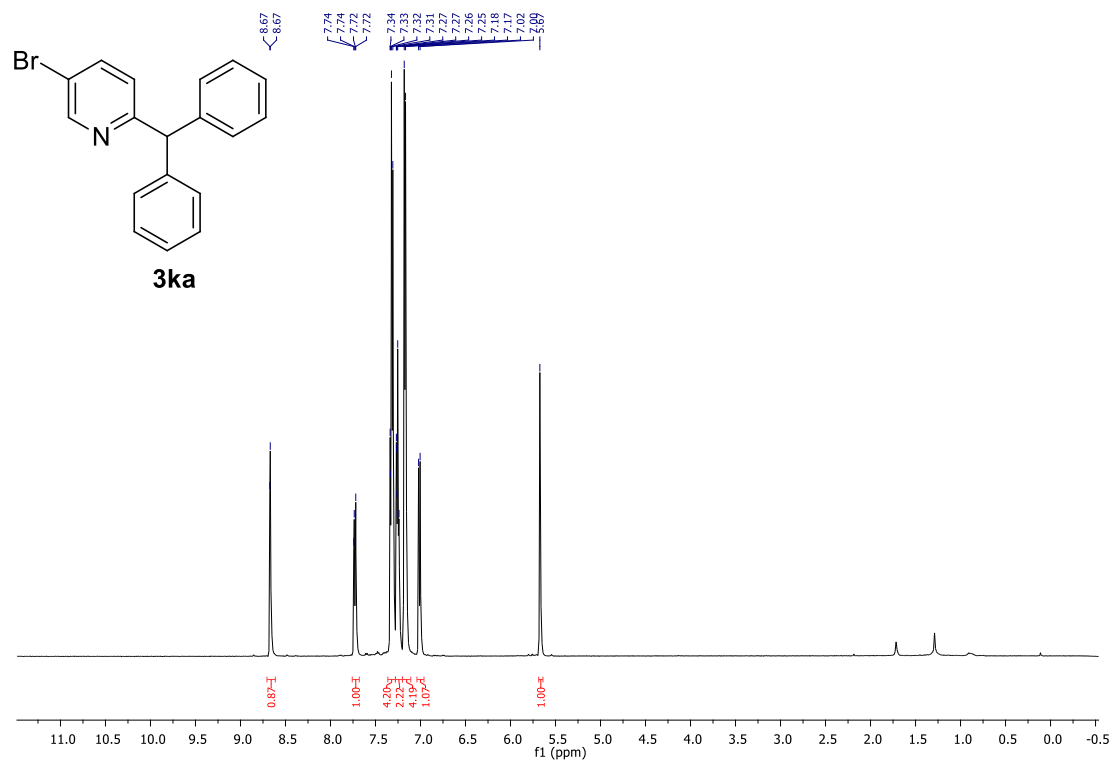

<sup>13</sup>C NMR of **3ka**

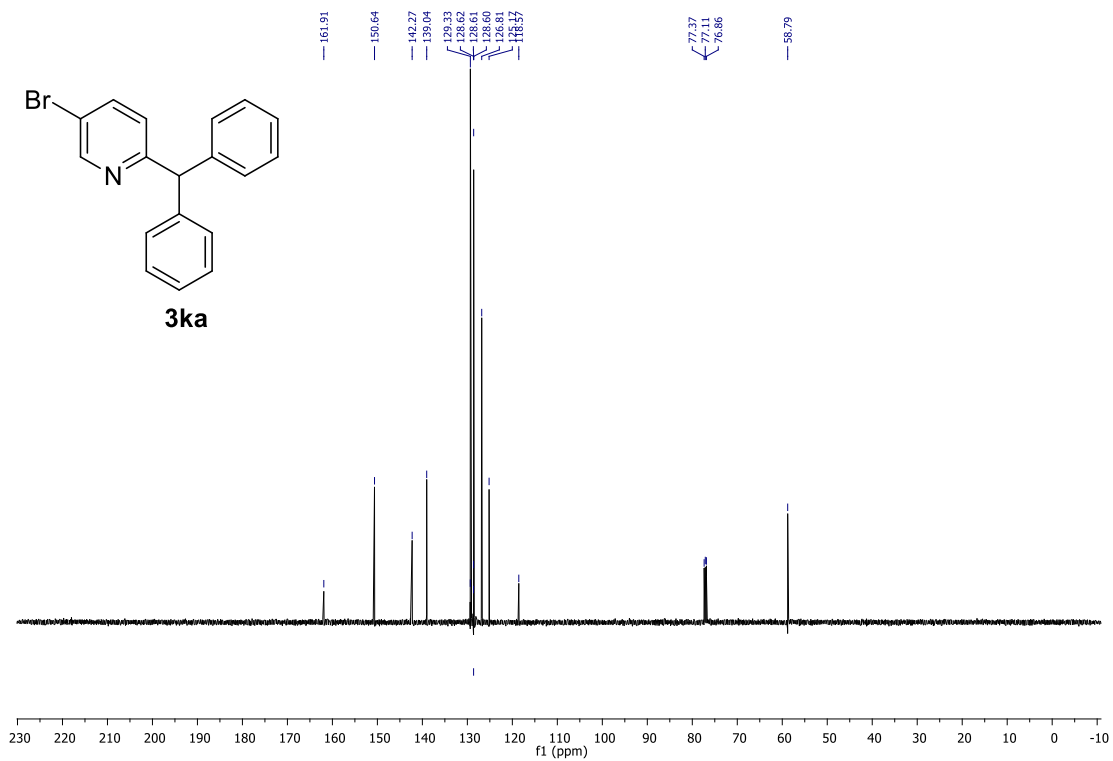

<sup>1</sup>H NMR of **3la**

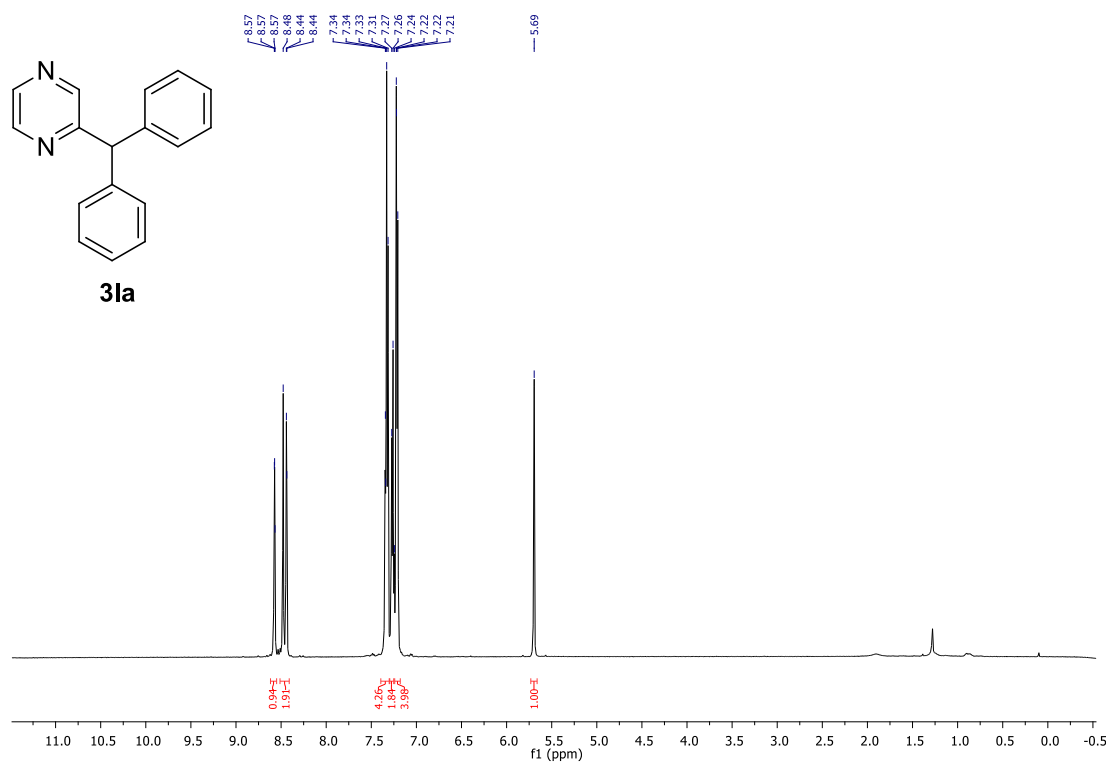

<sup>13</sup>C NMR of **3la**

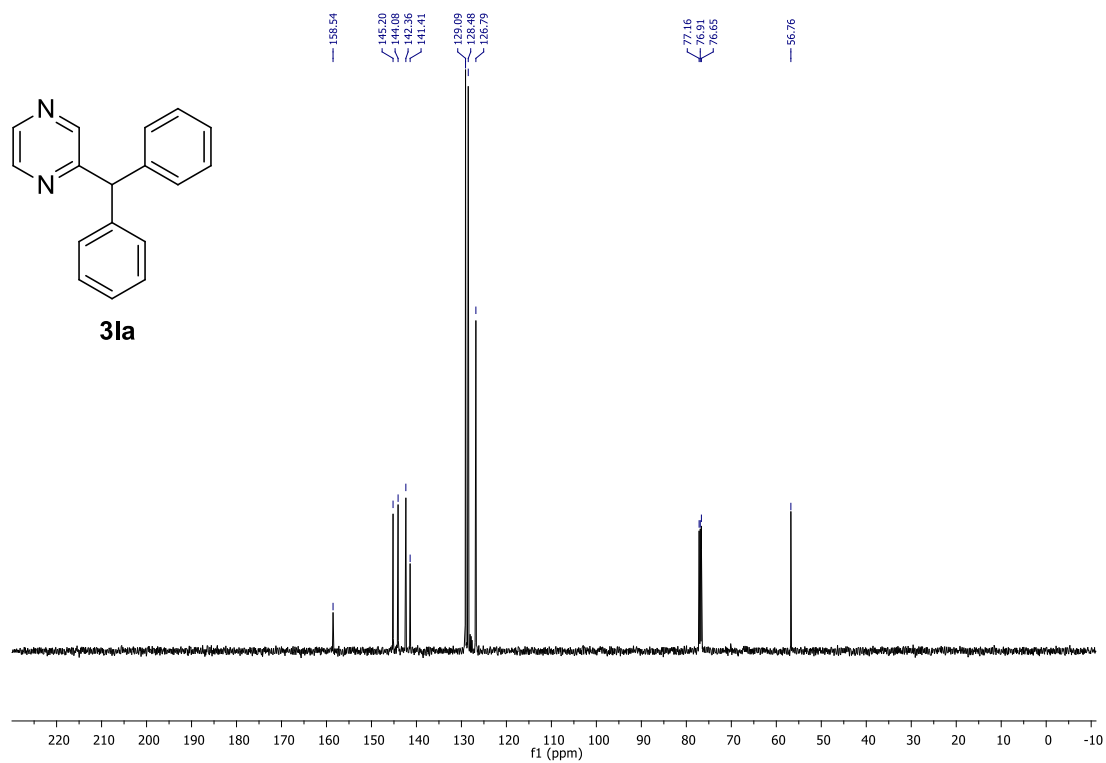

<sup>1</sup>H NMR of **3le**

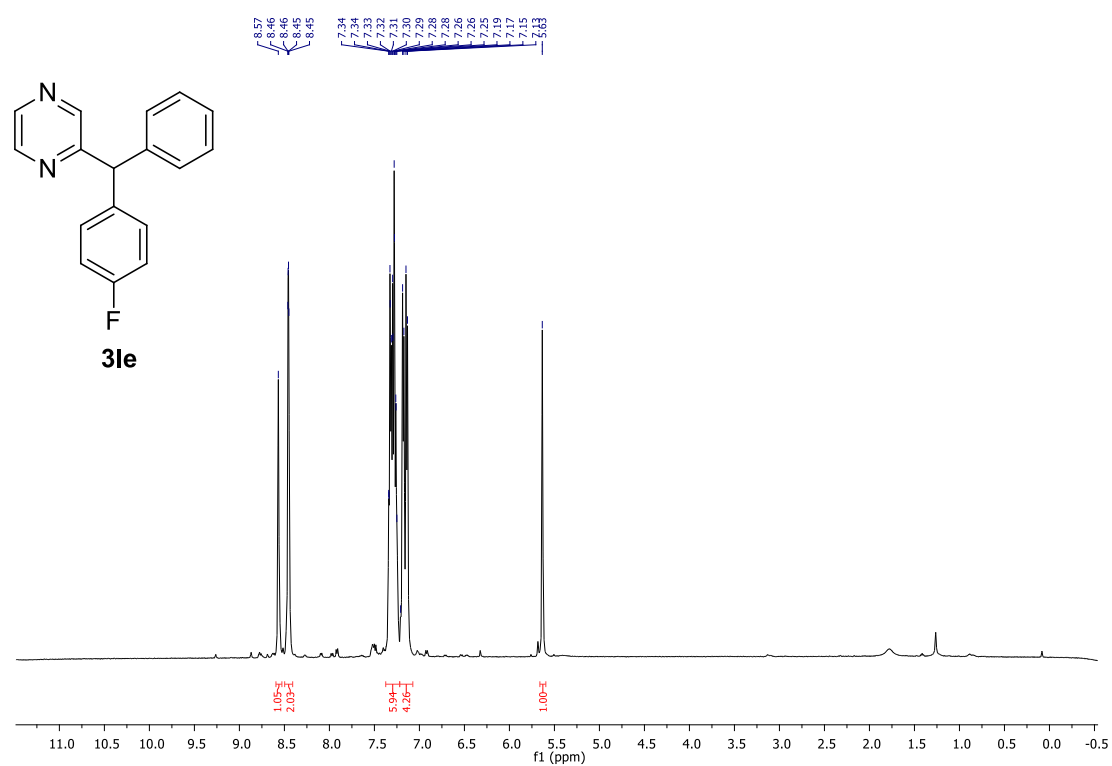

<sup>13</sup>C NMR of **3le**

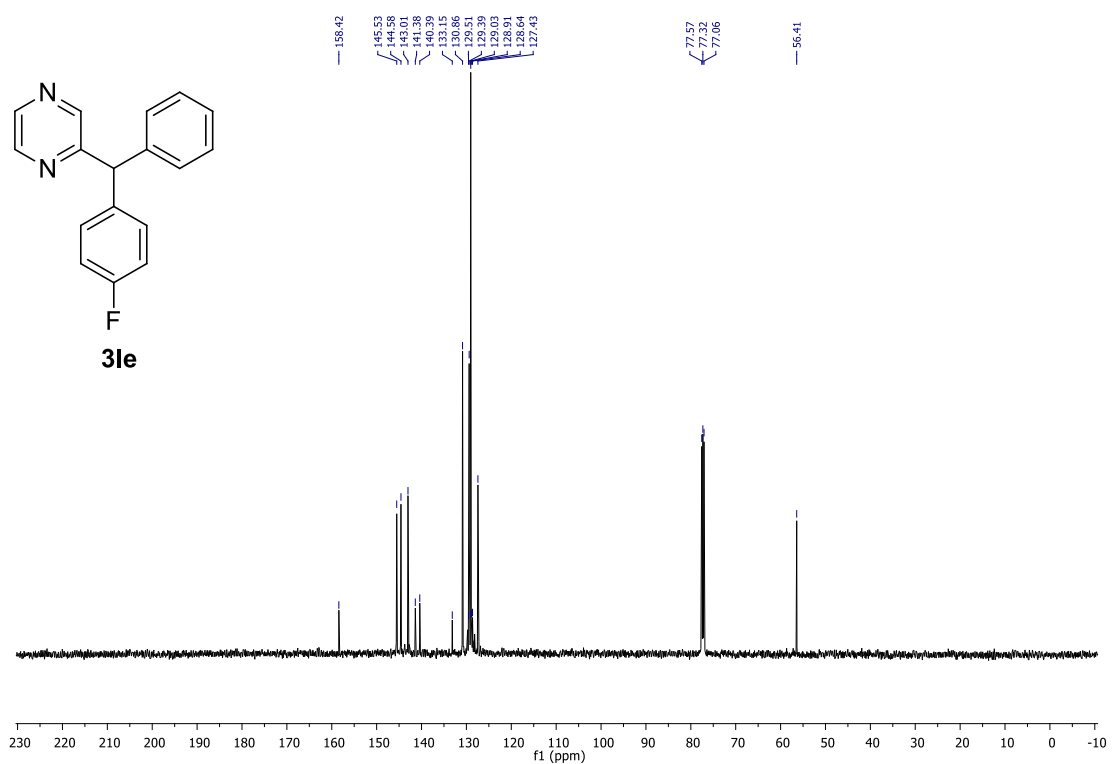

<sup>1</sup>H NMR of **3lf**

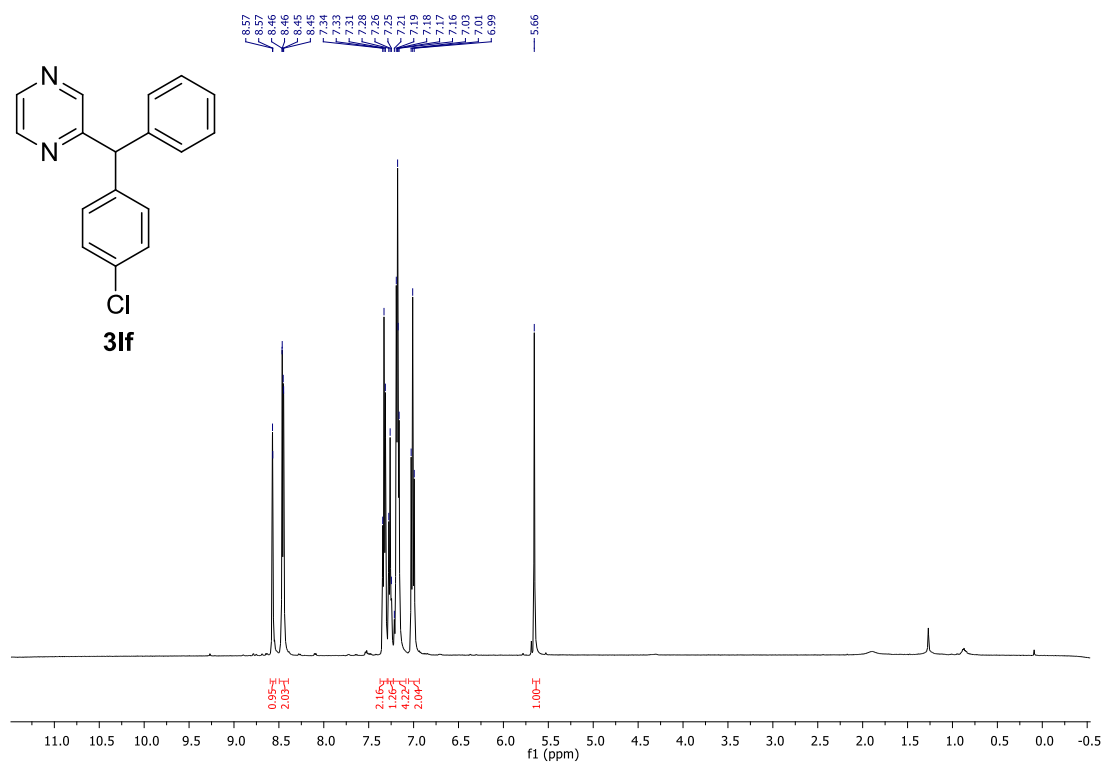

<sup>13</sup>C NMR of **3lf**

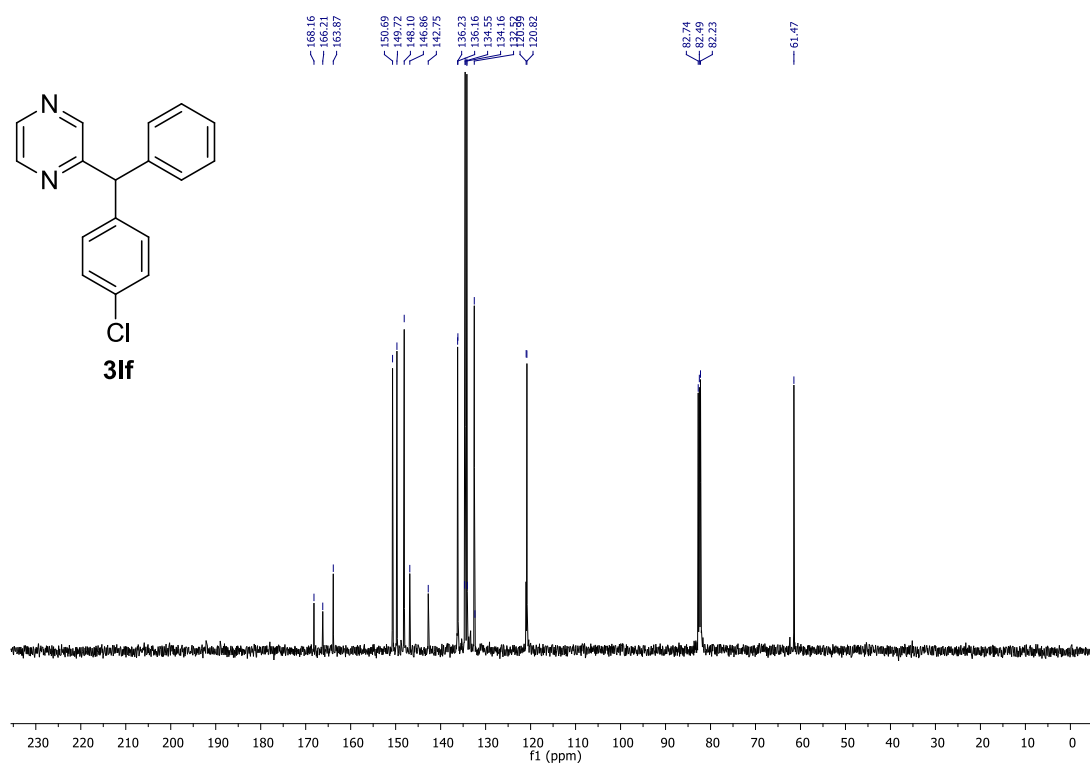

<sup>1</sup>H NMR of **7aa**

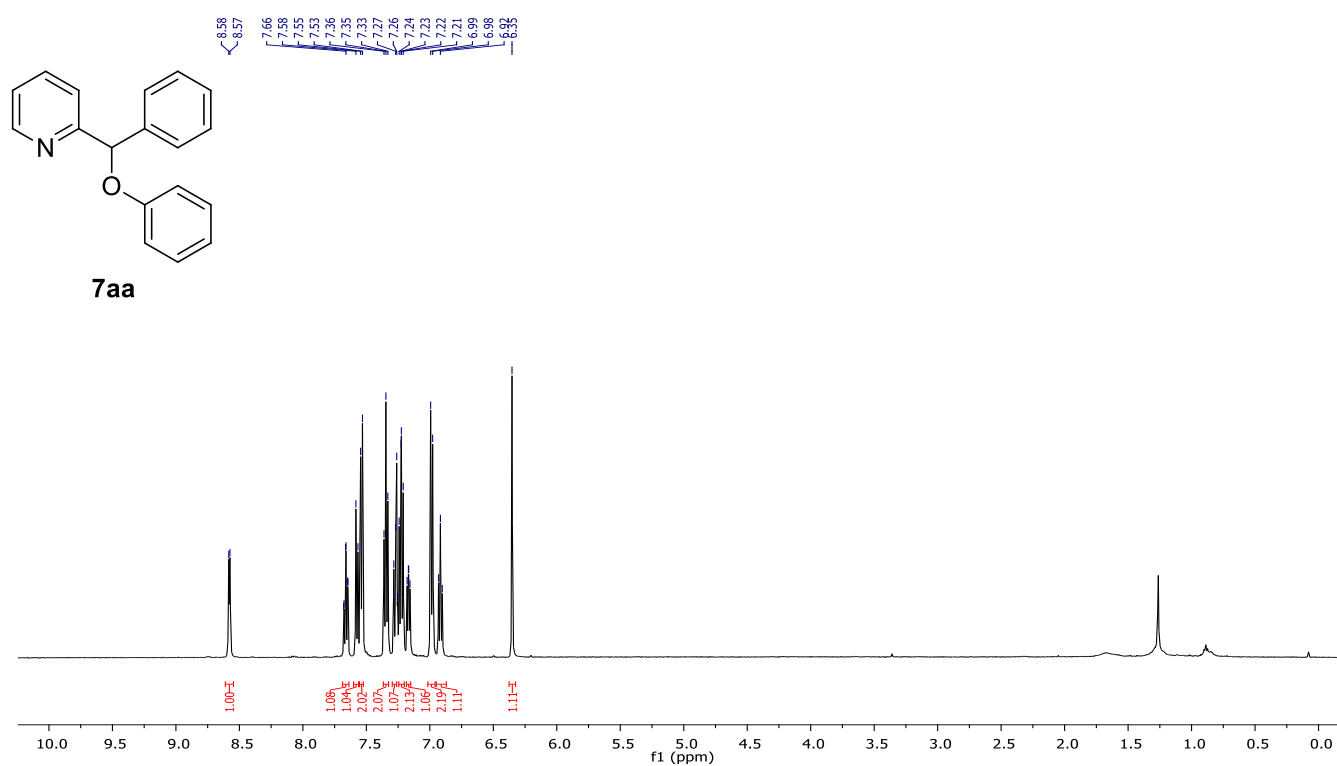

<sup>13</sup>C NMR of **7aa**

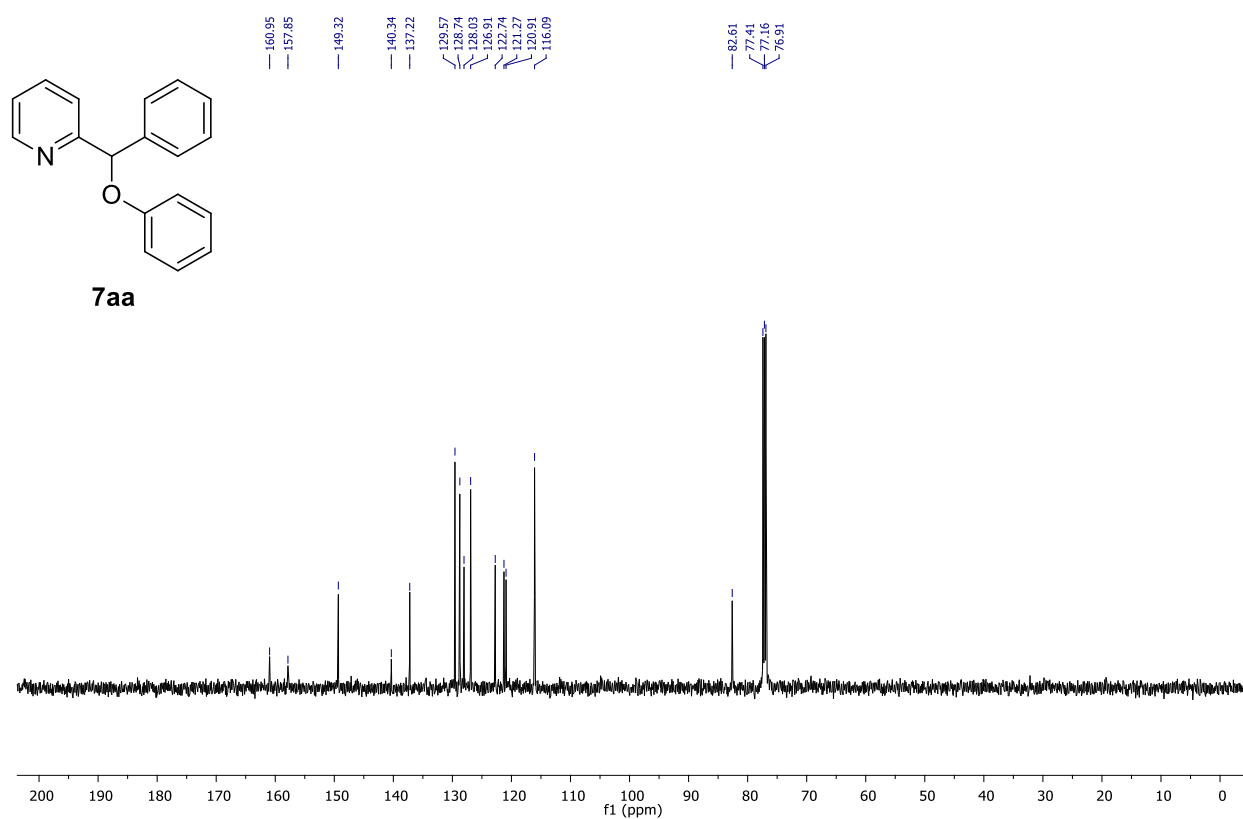

<sup>1</sup>H NMR of **7aa'**

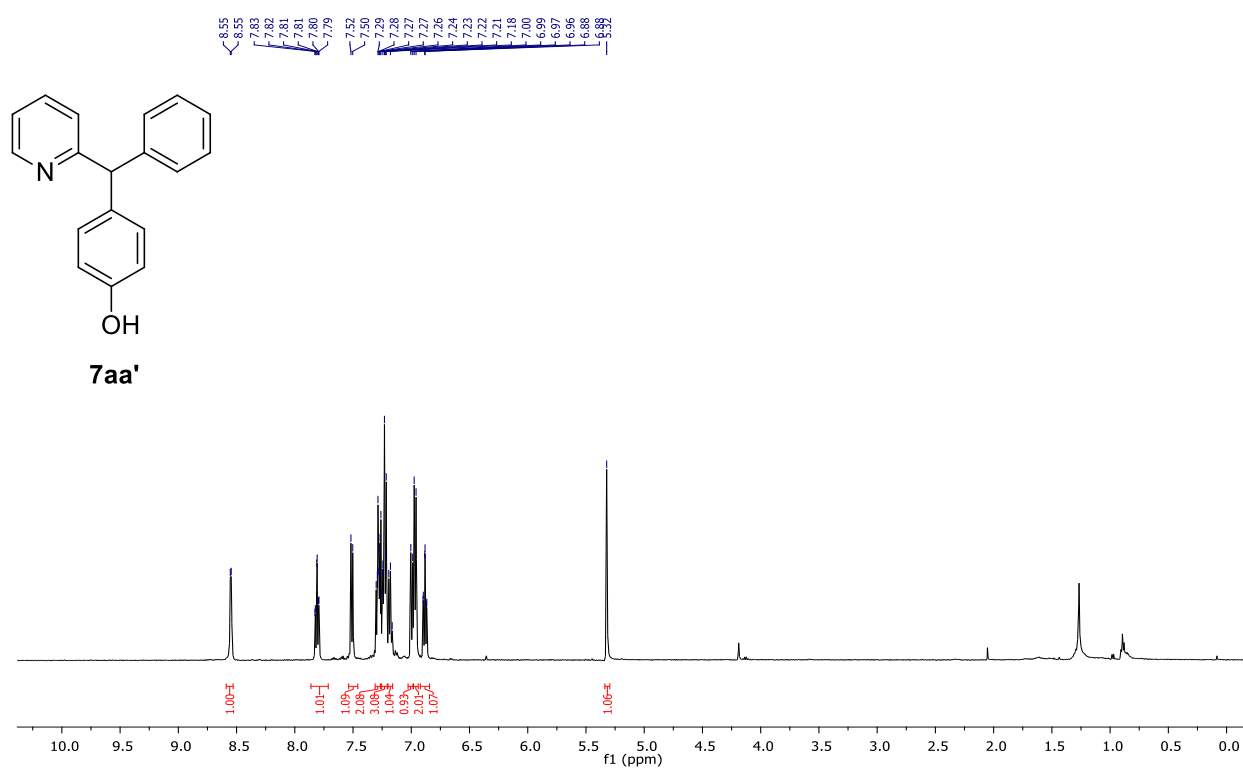

<sup>13</sup>C NMR of **7aa'**

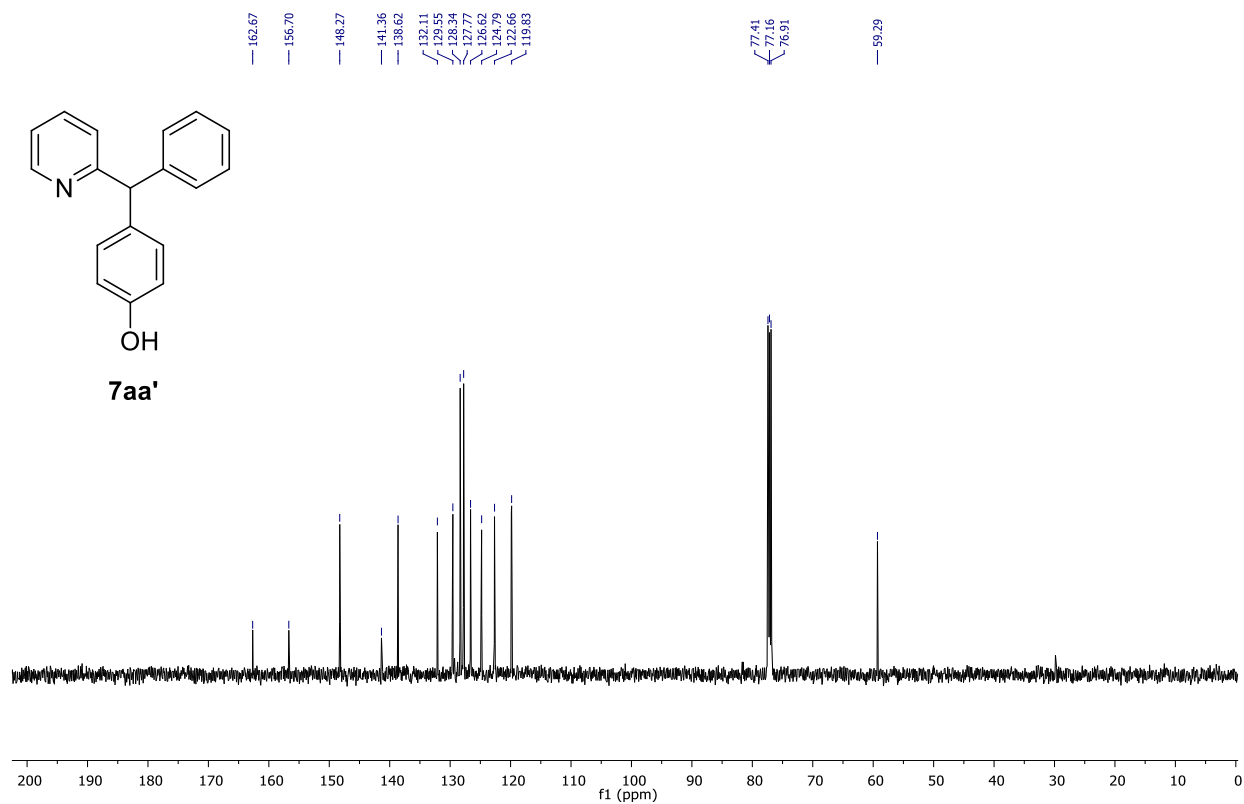

# <sup>1</sup>H NMR of **7ab**

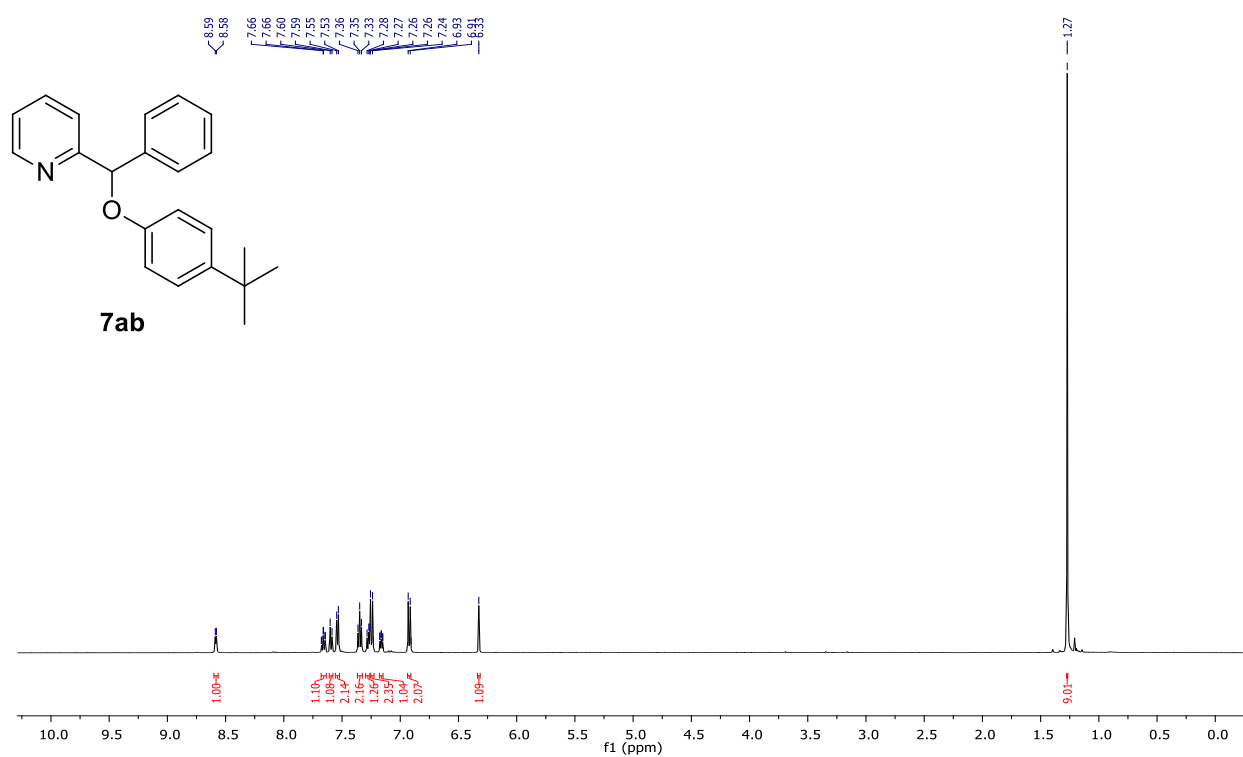

# <sup>13</sup>C NMR of **7ab**

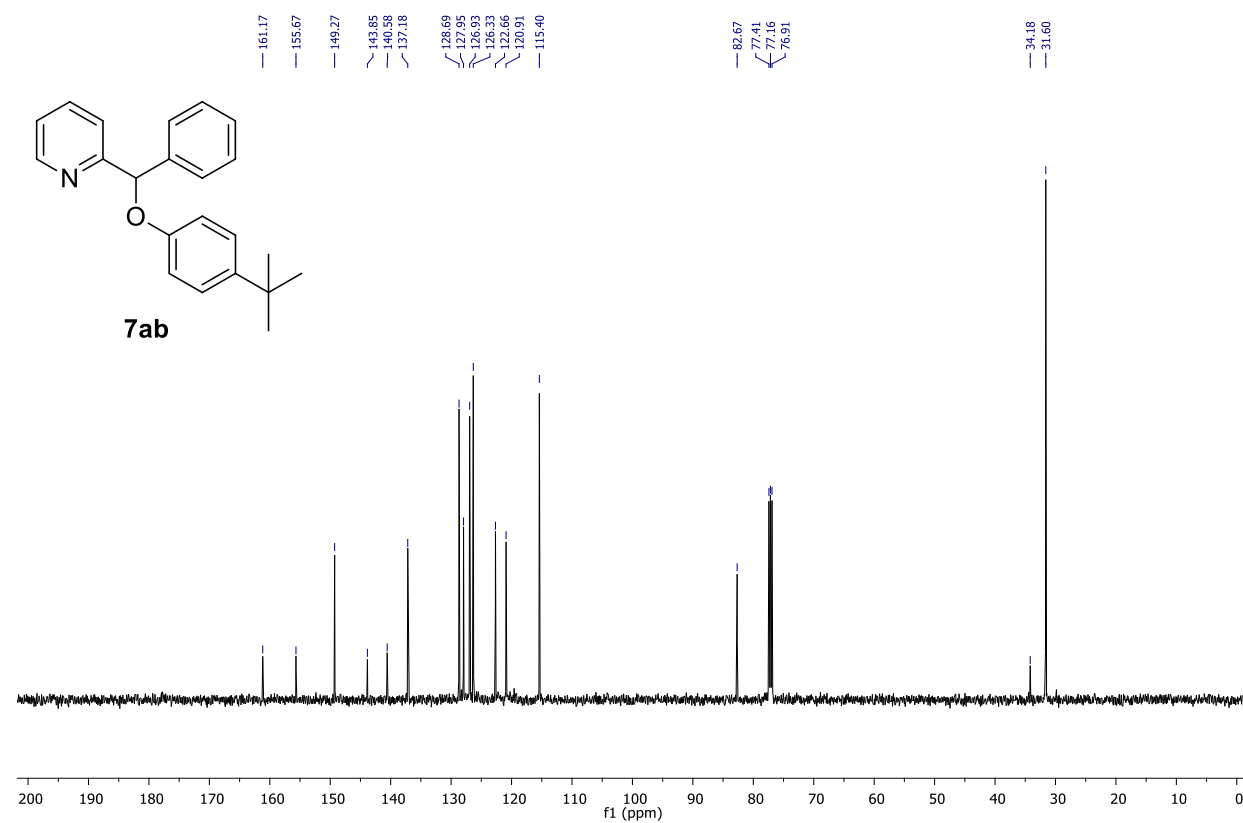

<sup>1</sup>H NMR of **7ab'**

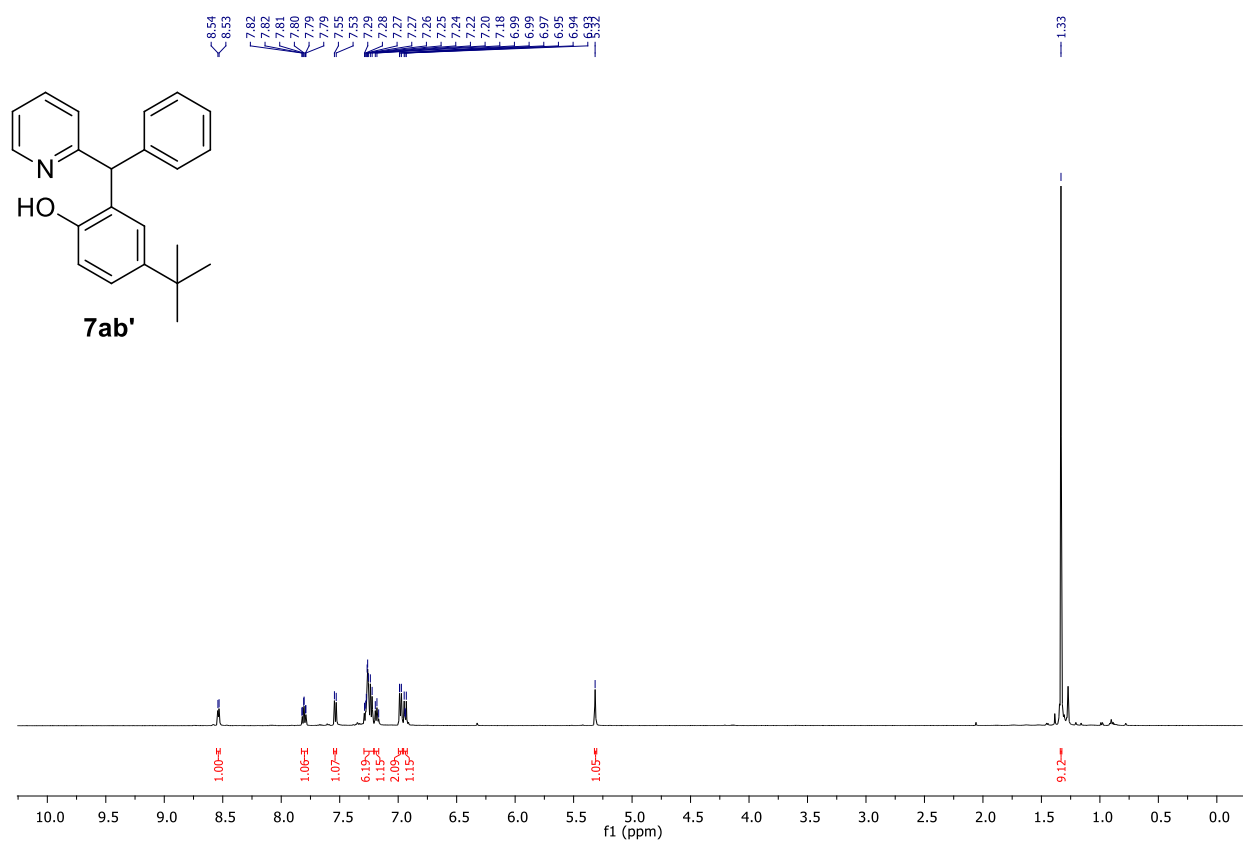

<sup>13</sup>C NMR of **7ab'**

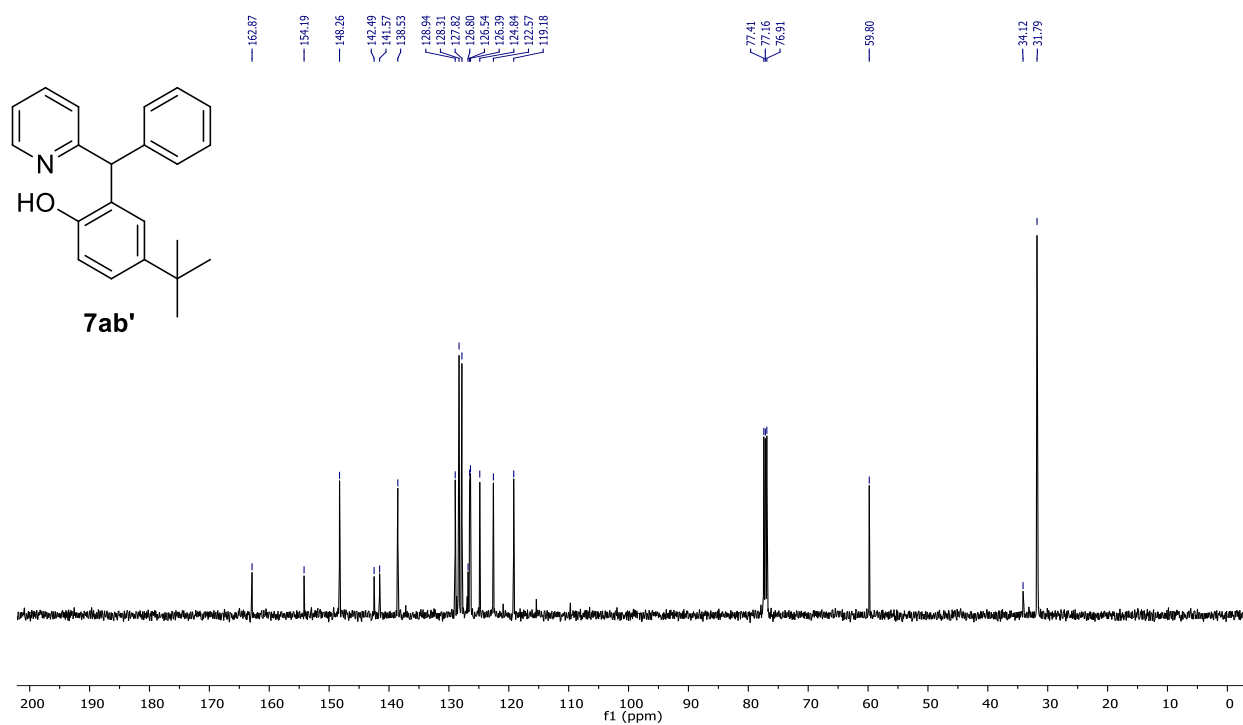

# <sup>1</sup>H NMR of **7ac**

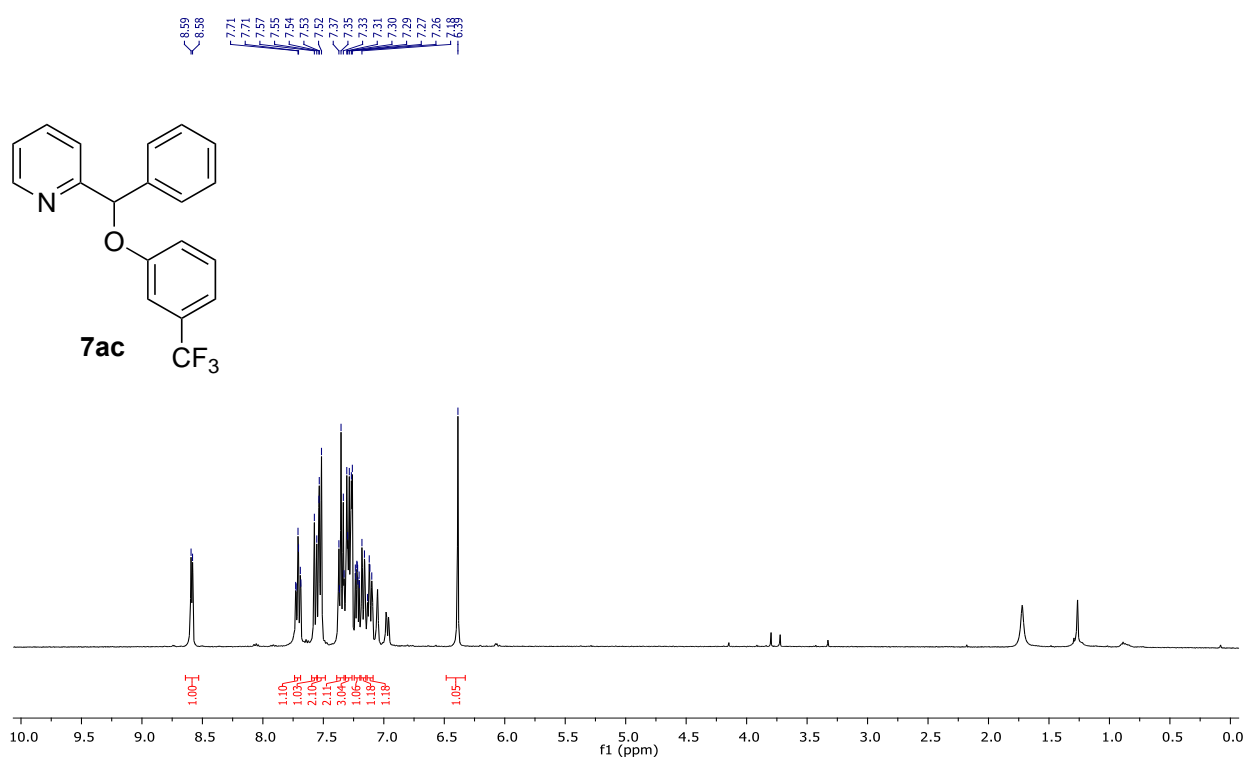

# <sup>13</sup>C NMR of **7ac**

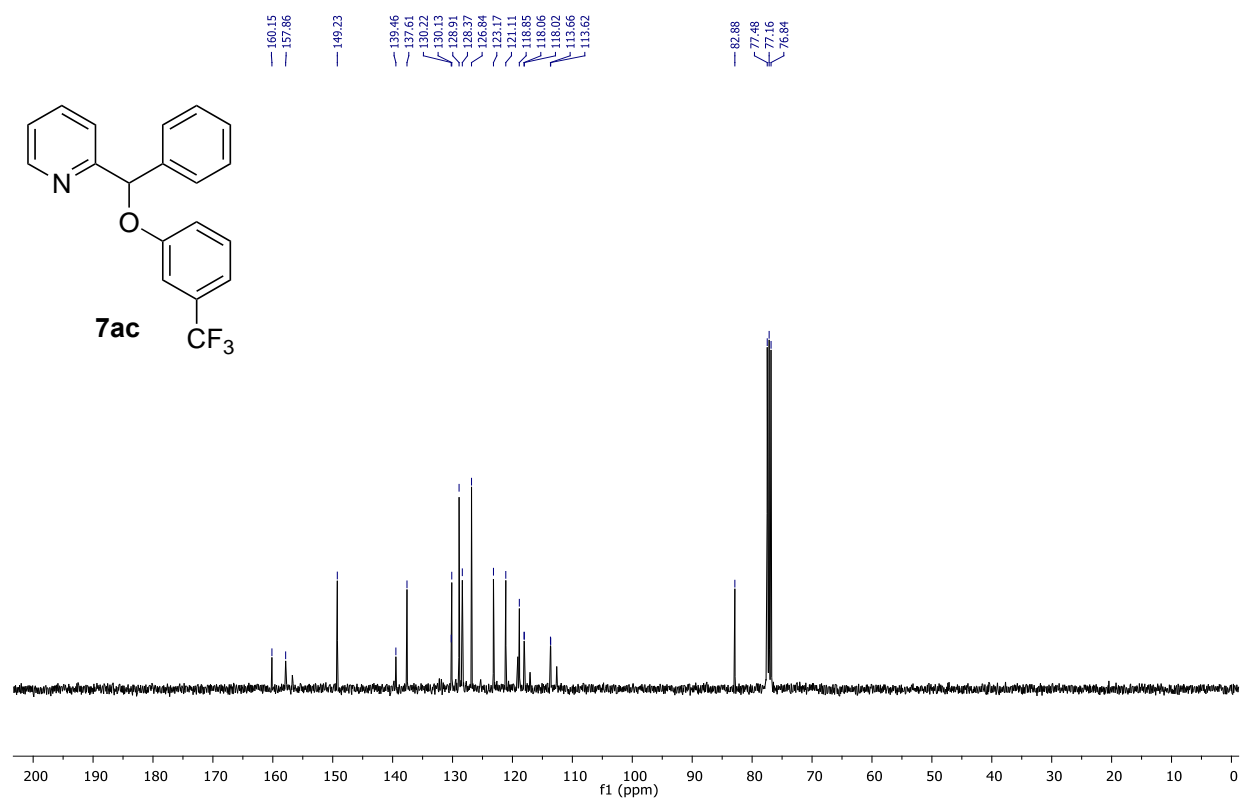

# <sup>1</sup>H NMR of **7ad**

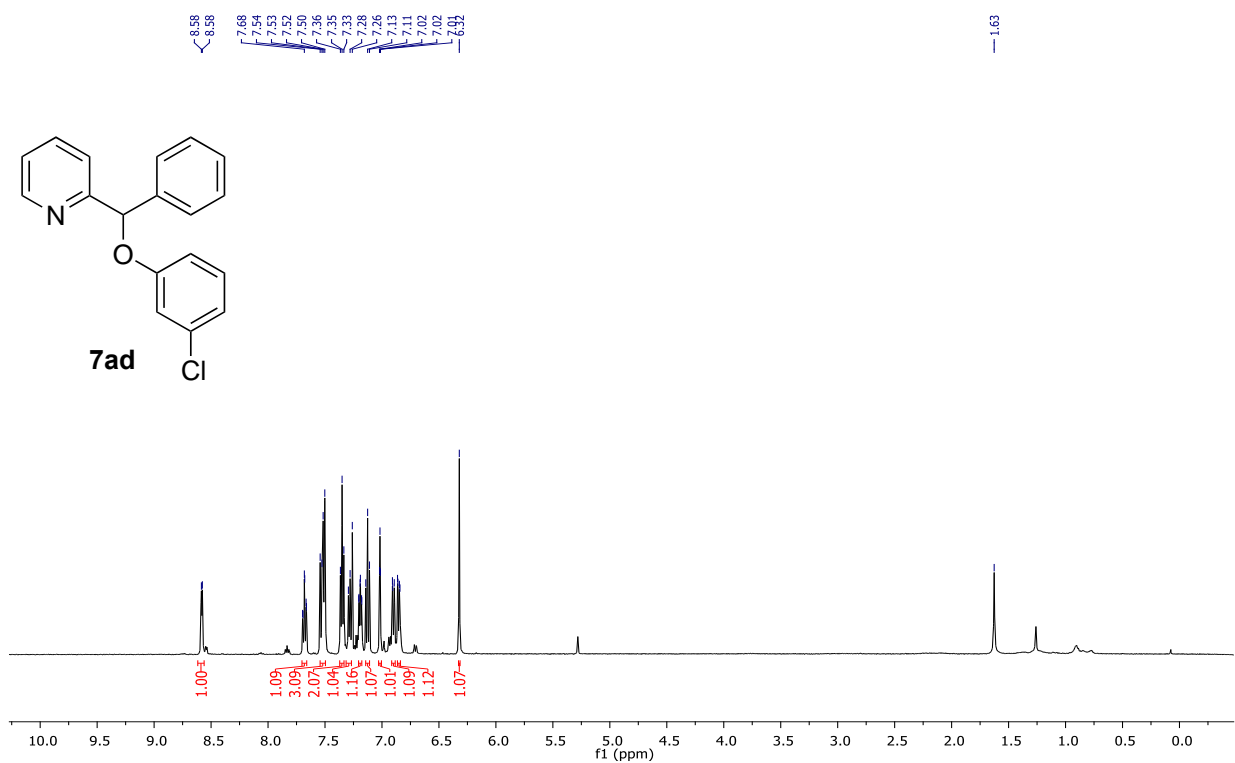

# <sup>13</sup>C NMR of **7ad**

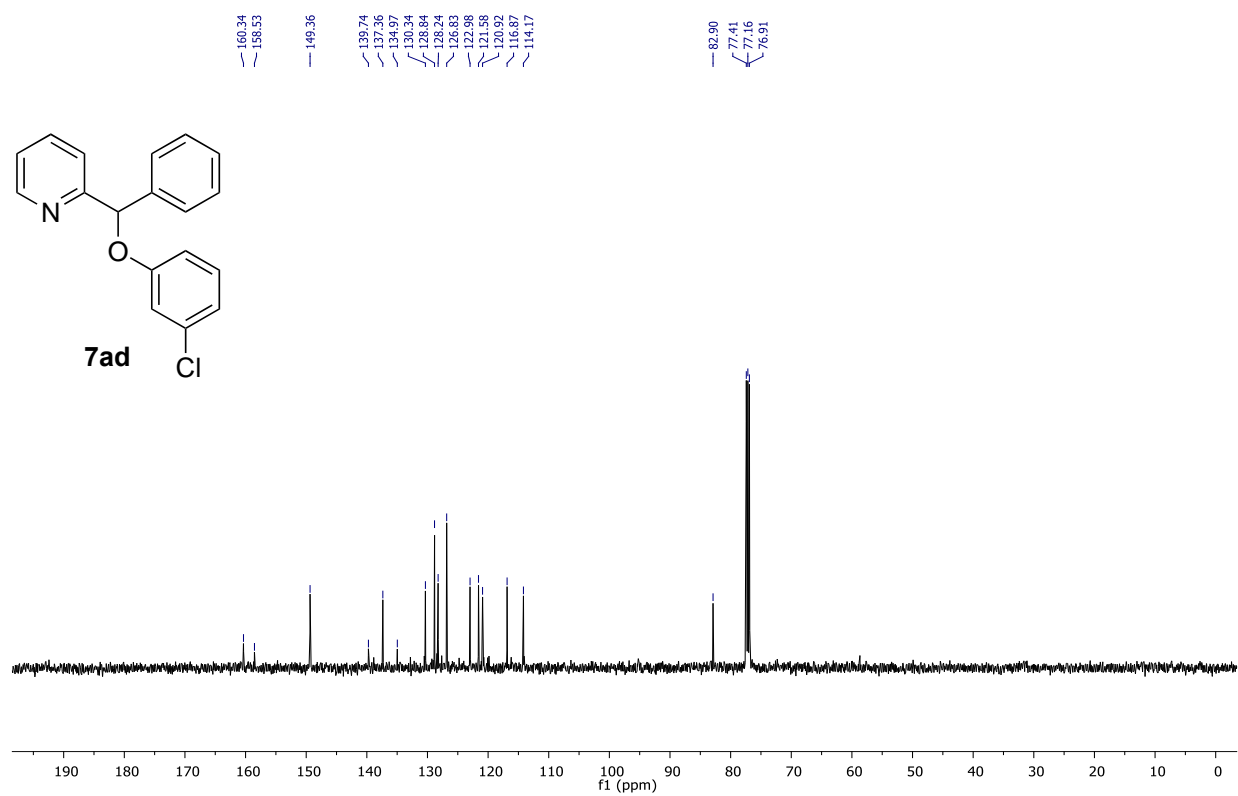

# <sup>1</sup>H NMR of **7ae**

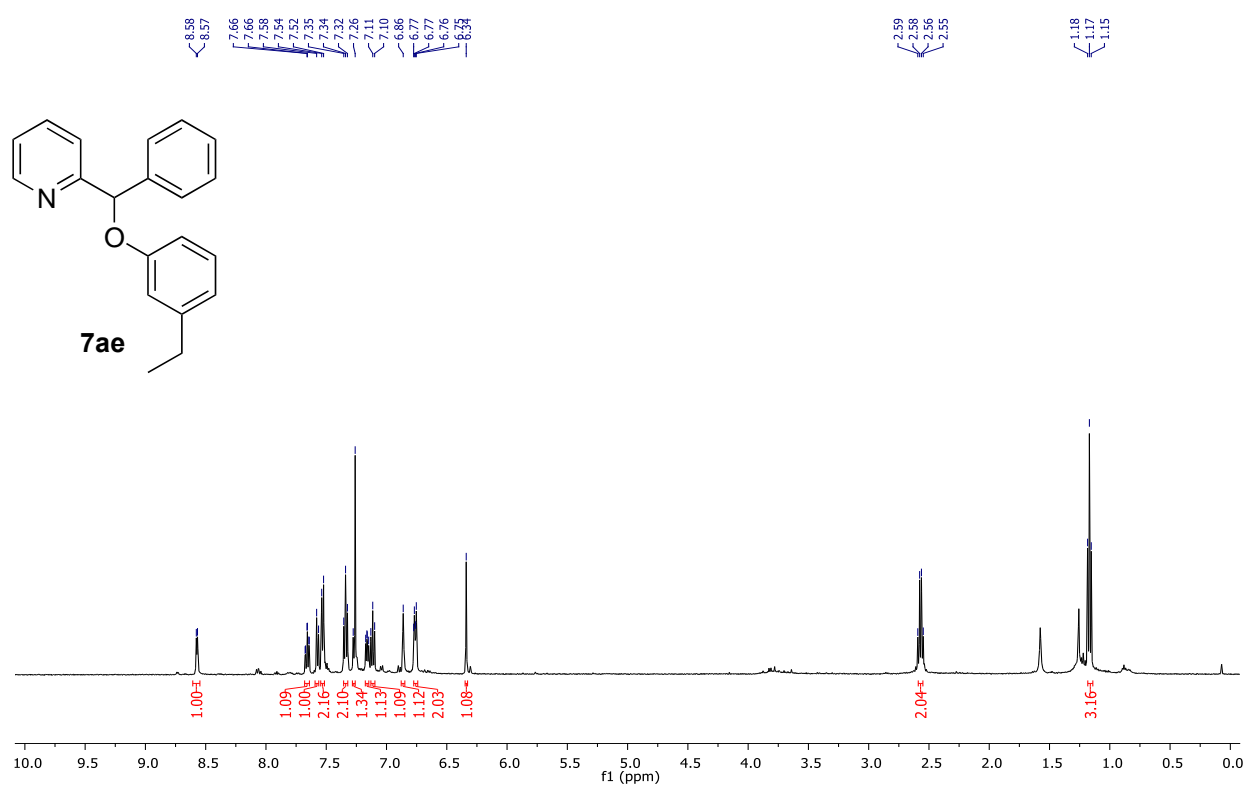

# <sup>13</sup>C NMR of **7ae**

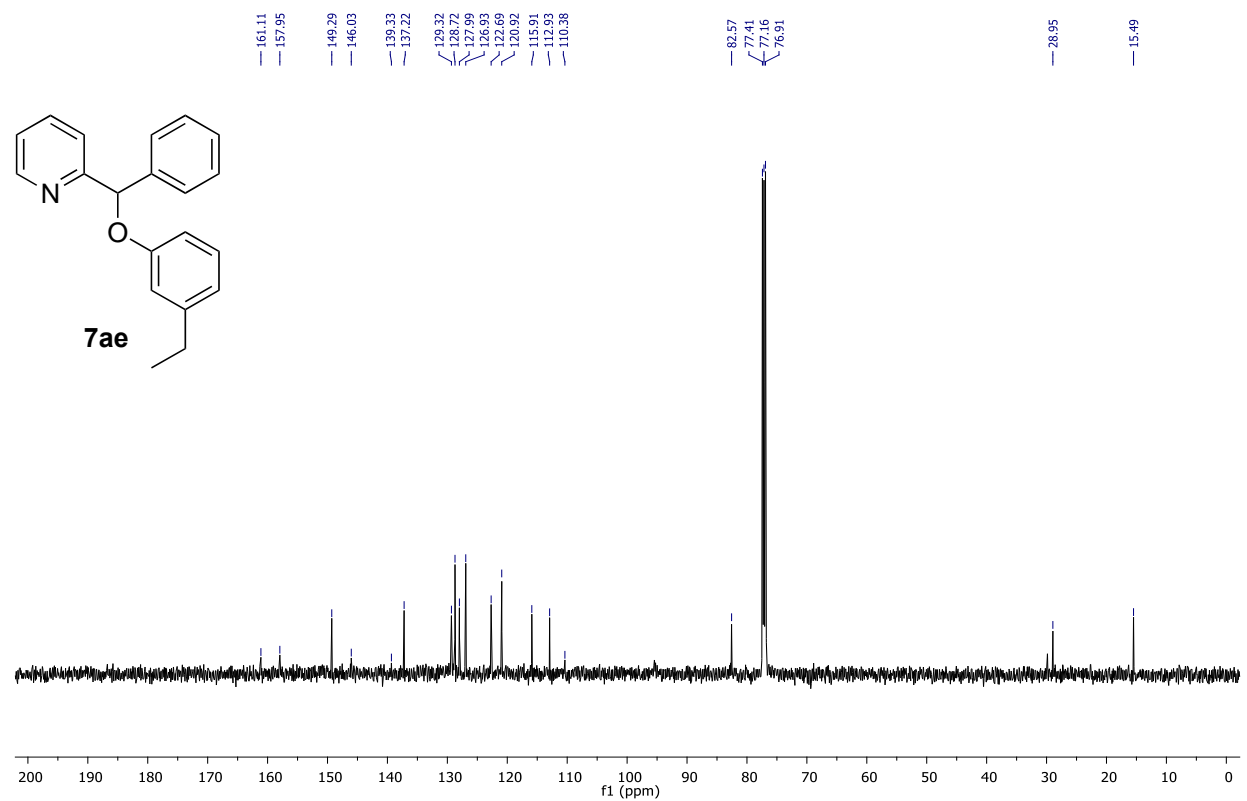

# <sup>1</sup>H NMR of **7af**

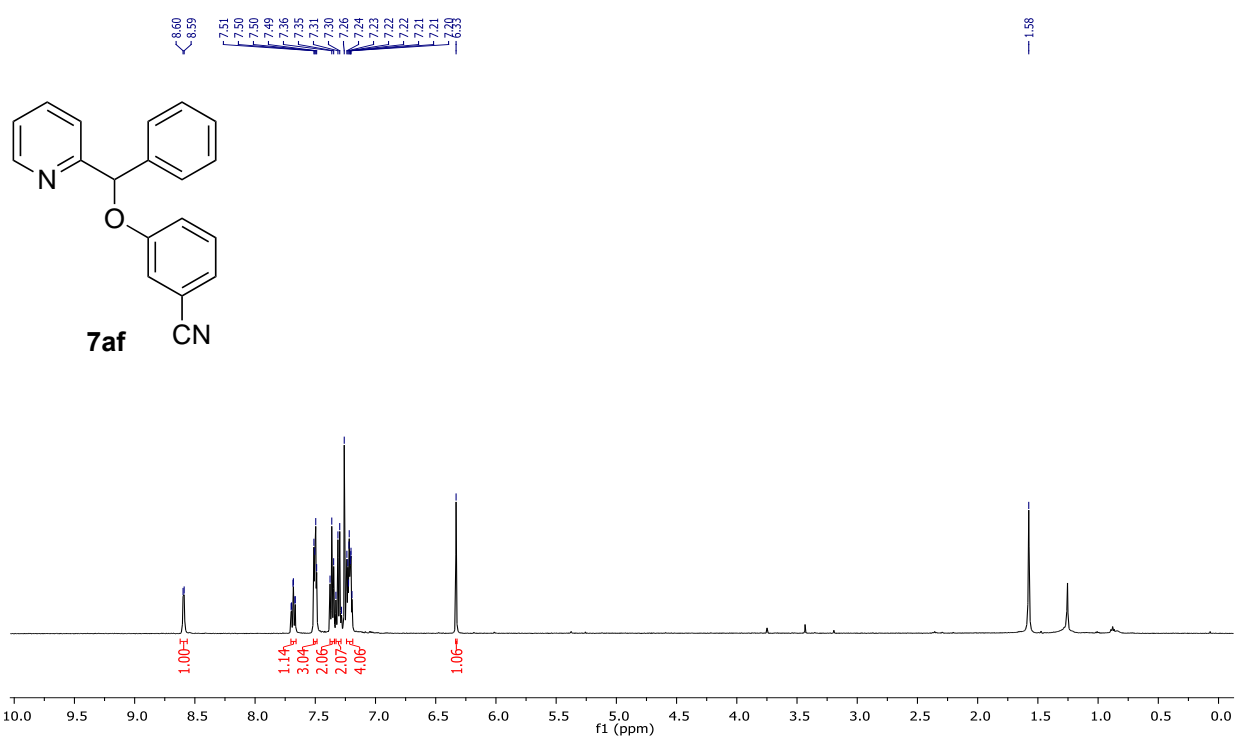

# <sup>13</sup>C NMR of **7af**

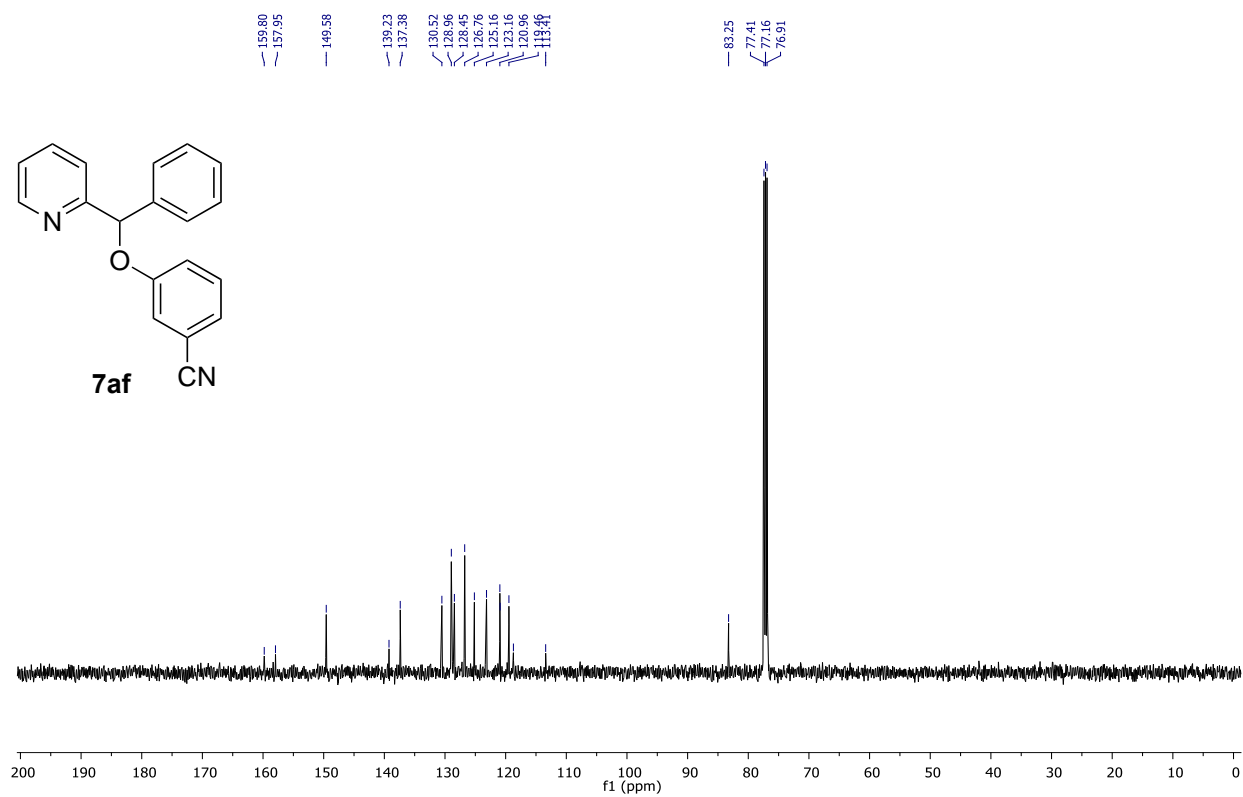

# <sup>1</sup>H NMR of **7ag**

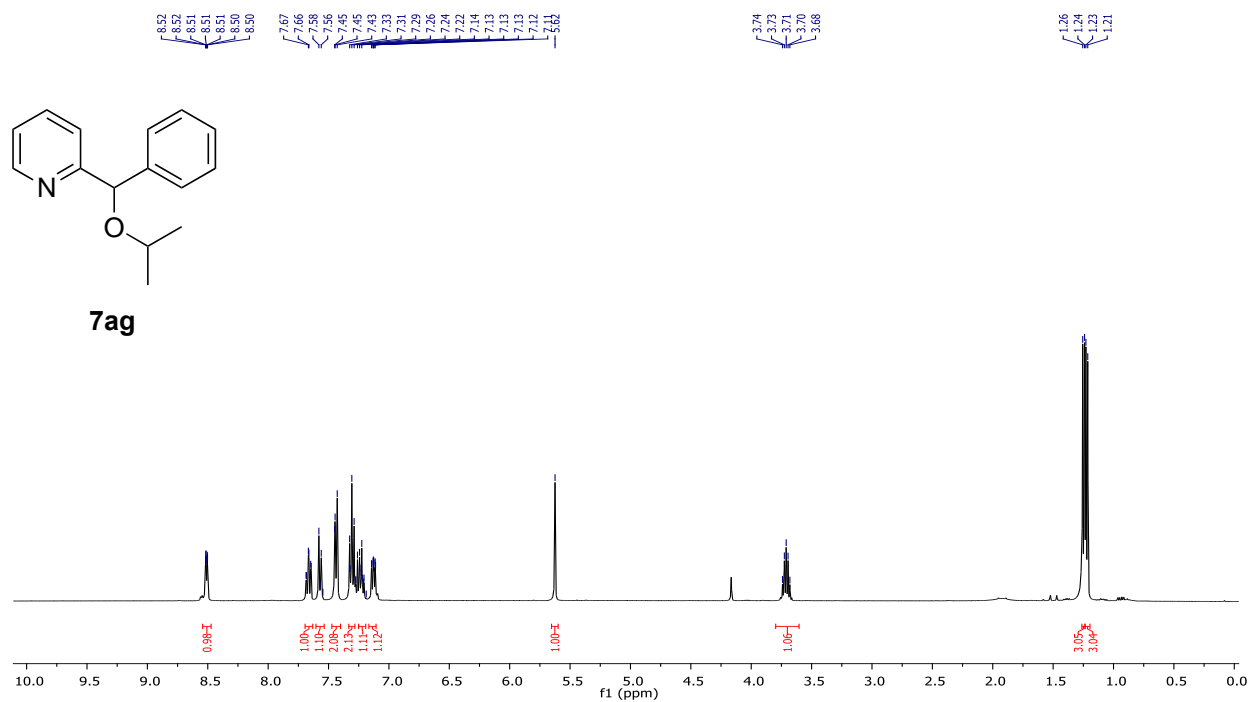

# <sup>13</sup>C NMR of **7ag**

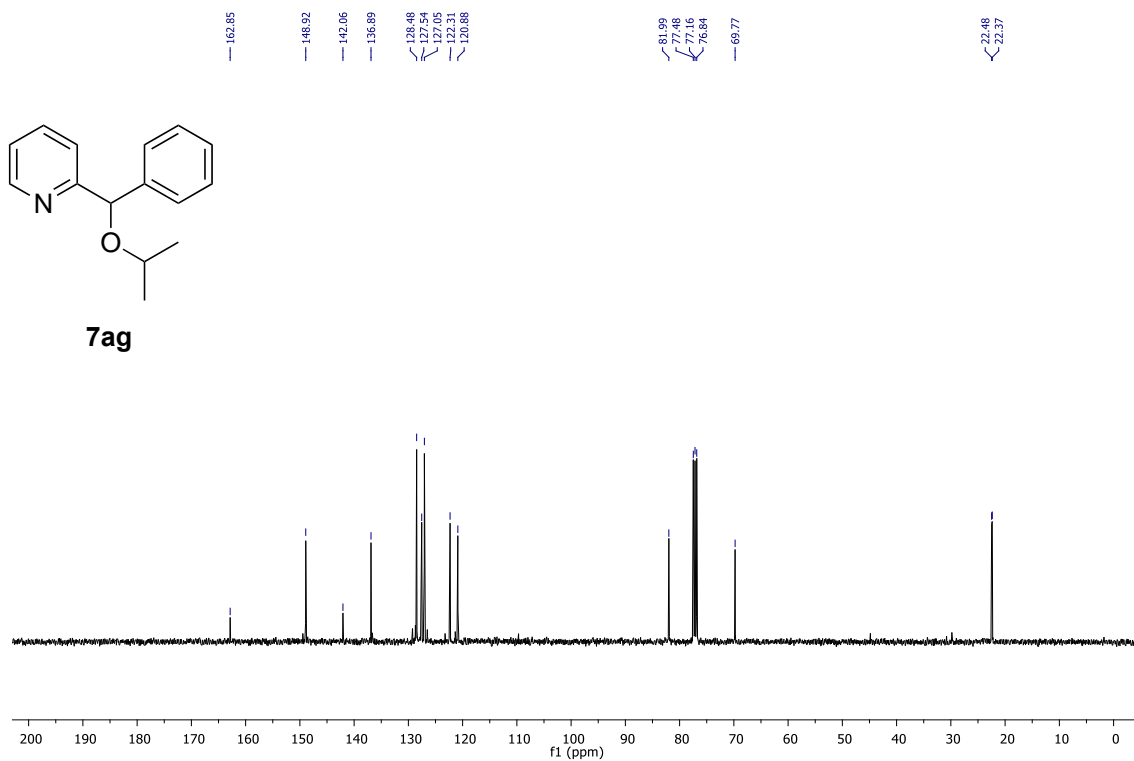

# <sup>1</sup>H NMR of **7ah**

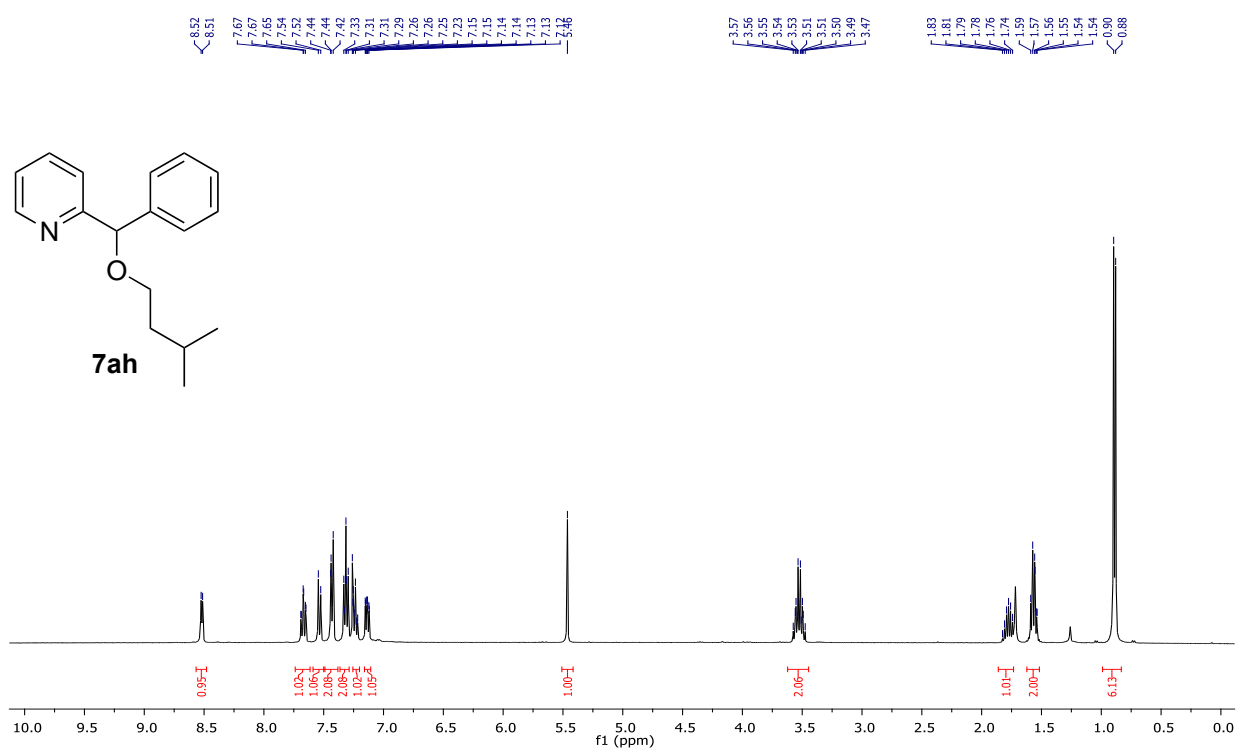

# <sup>13</sup>C NMR of **7ah**

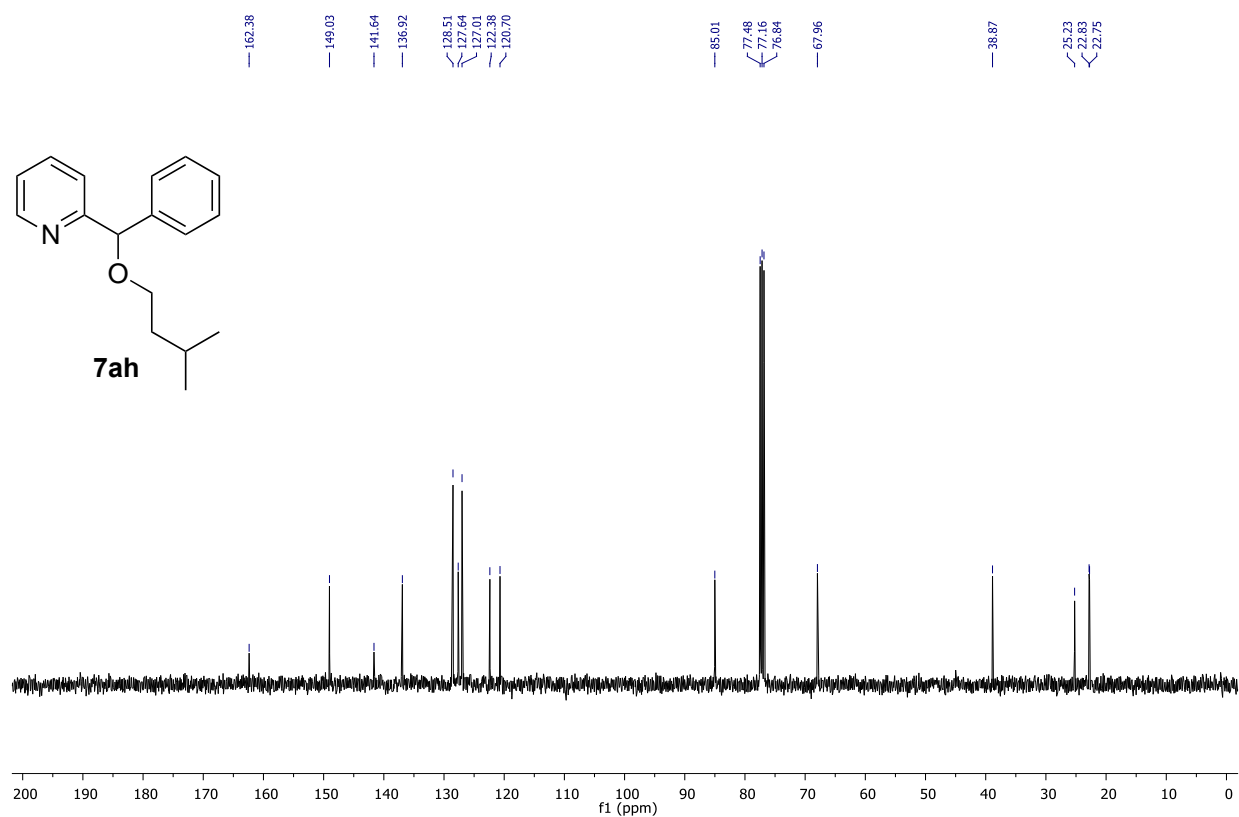

# <sup>1</sup>H NMR of **7ai**

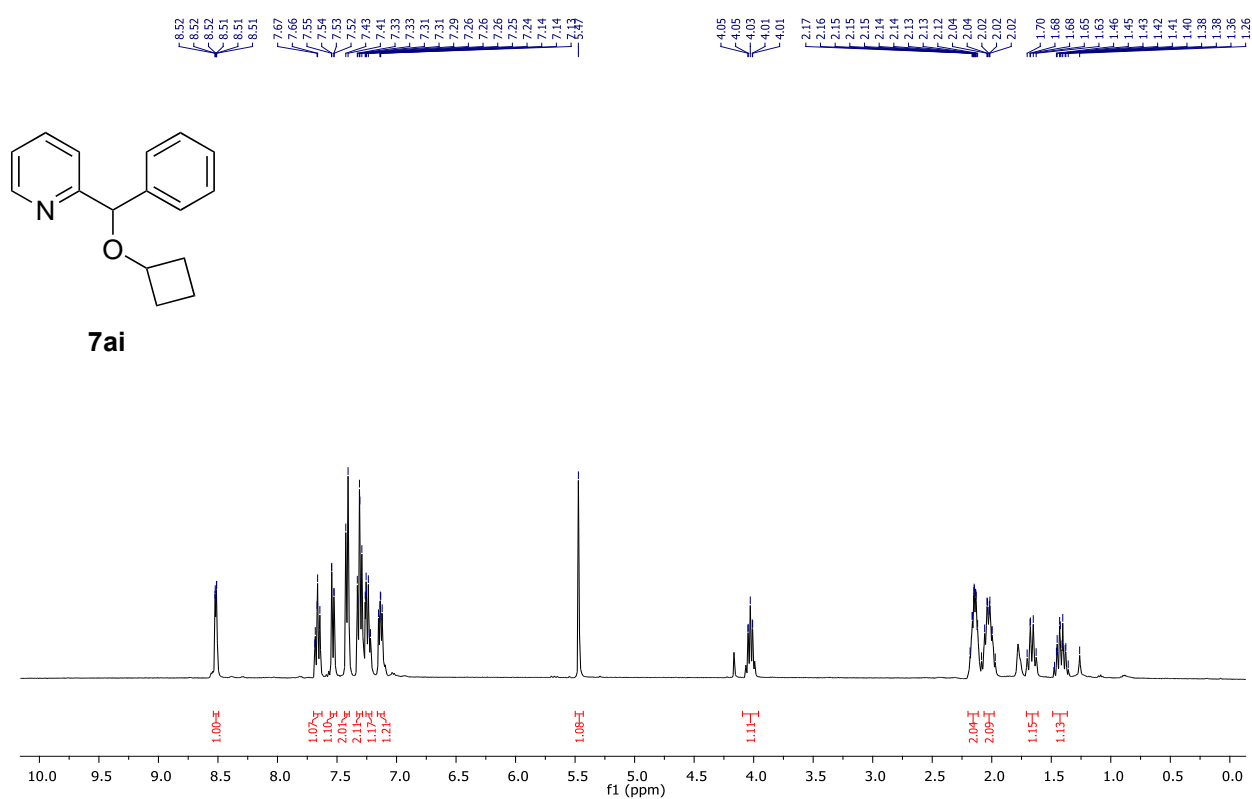

# <sup>13</sup>C NMR of **7ai**

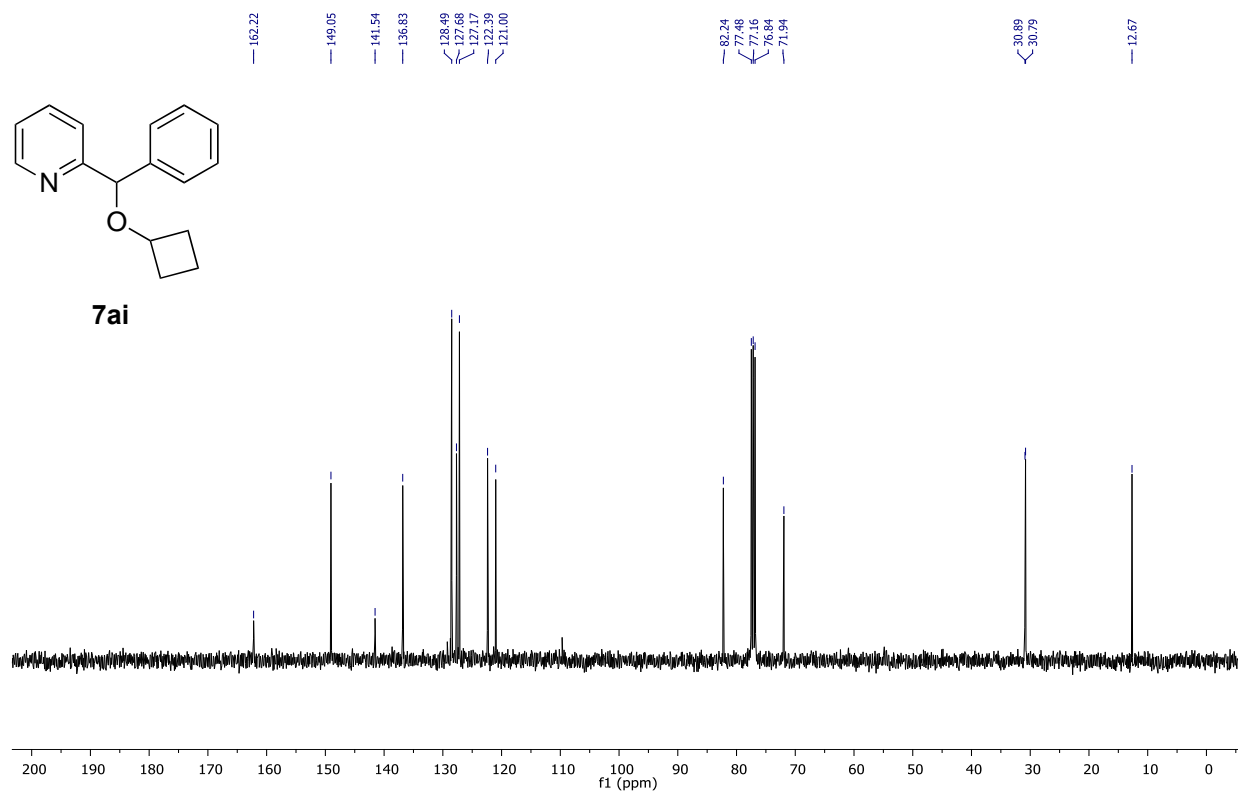

# <sup>1</sup>H NMR of **7aj**

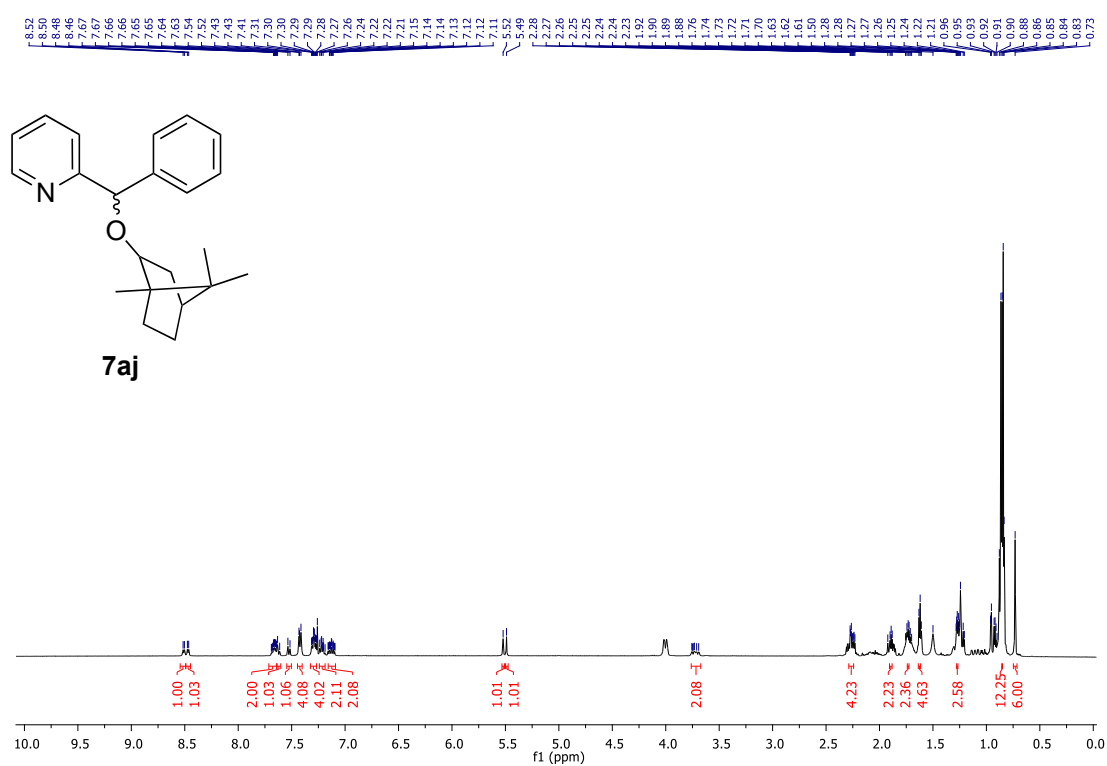

# <sup>13</sup>C NMR of **7aj**

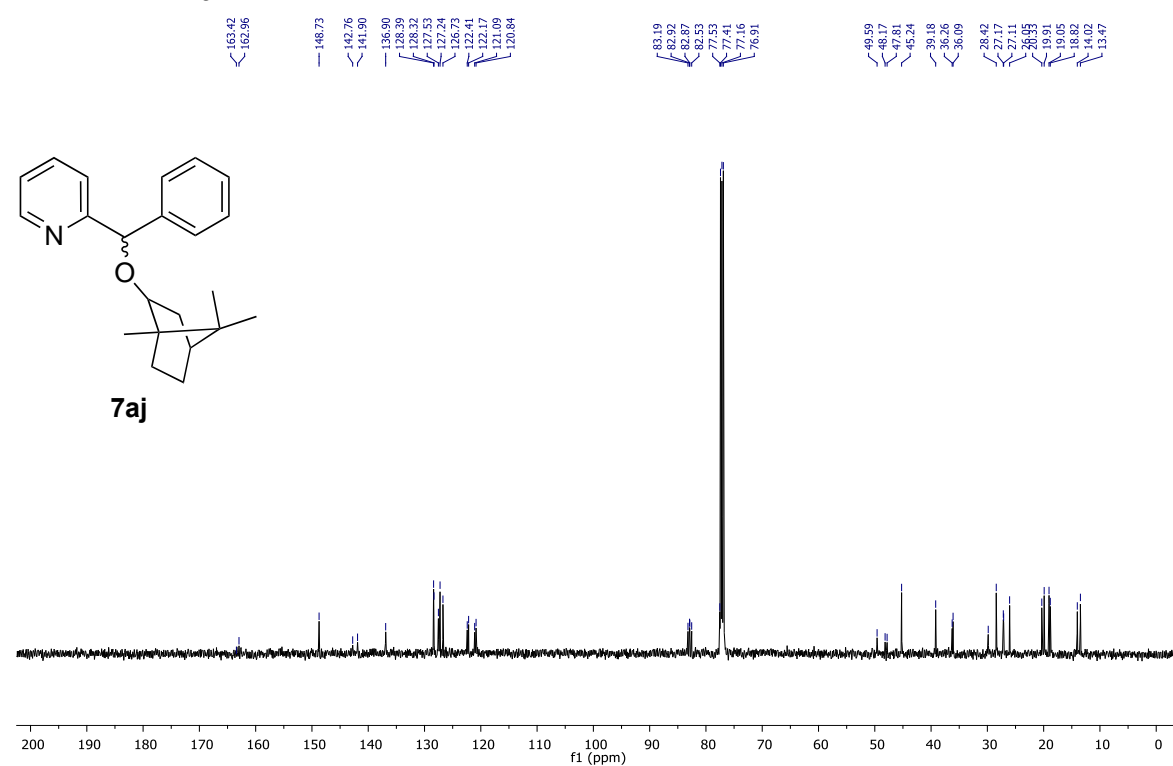

# <sup>1</sup>H NMR of **7ak**

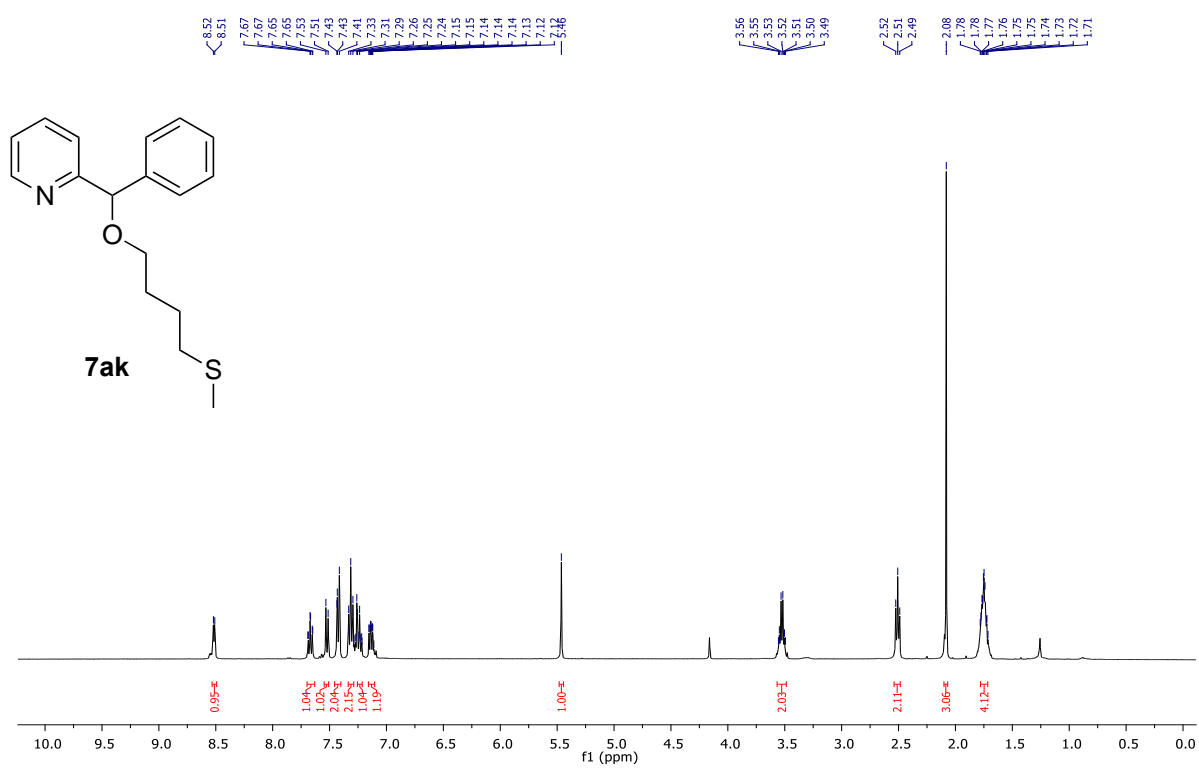

# <sup>13</sup>C NMR of **7ak**

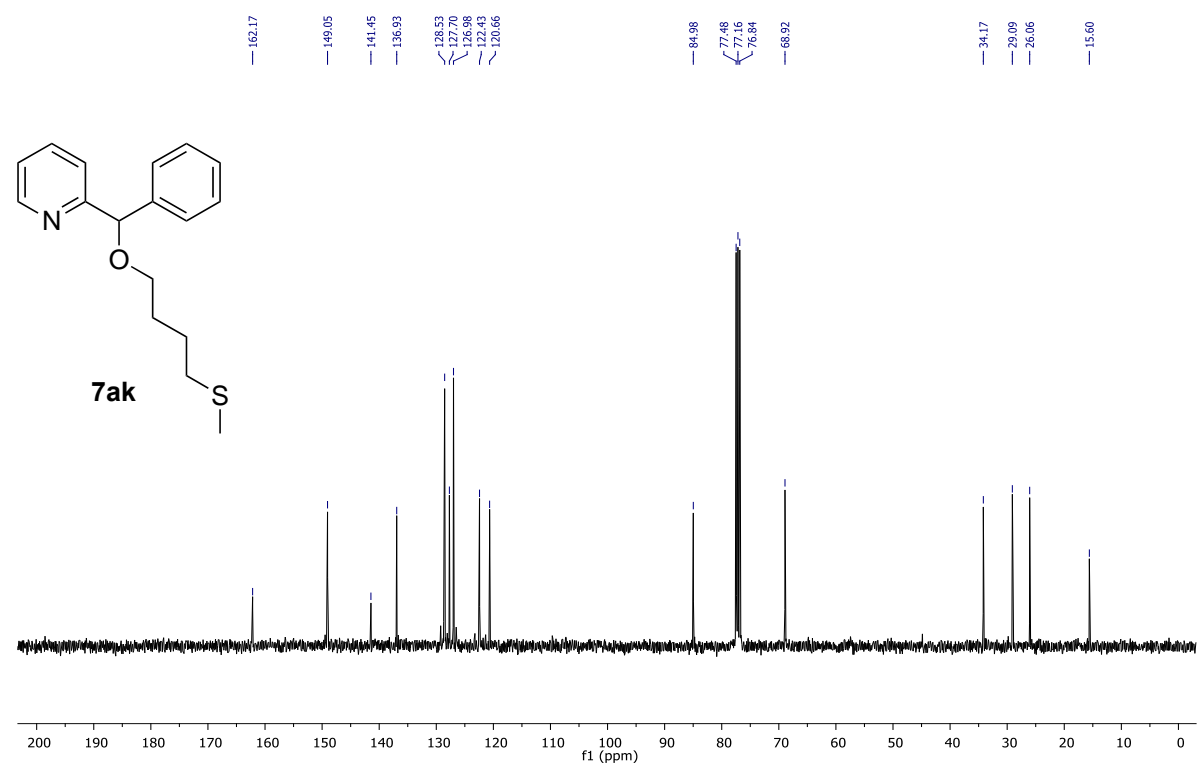

# <sup>1</sup>H NMR of **7al**

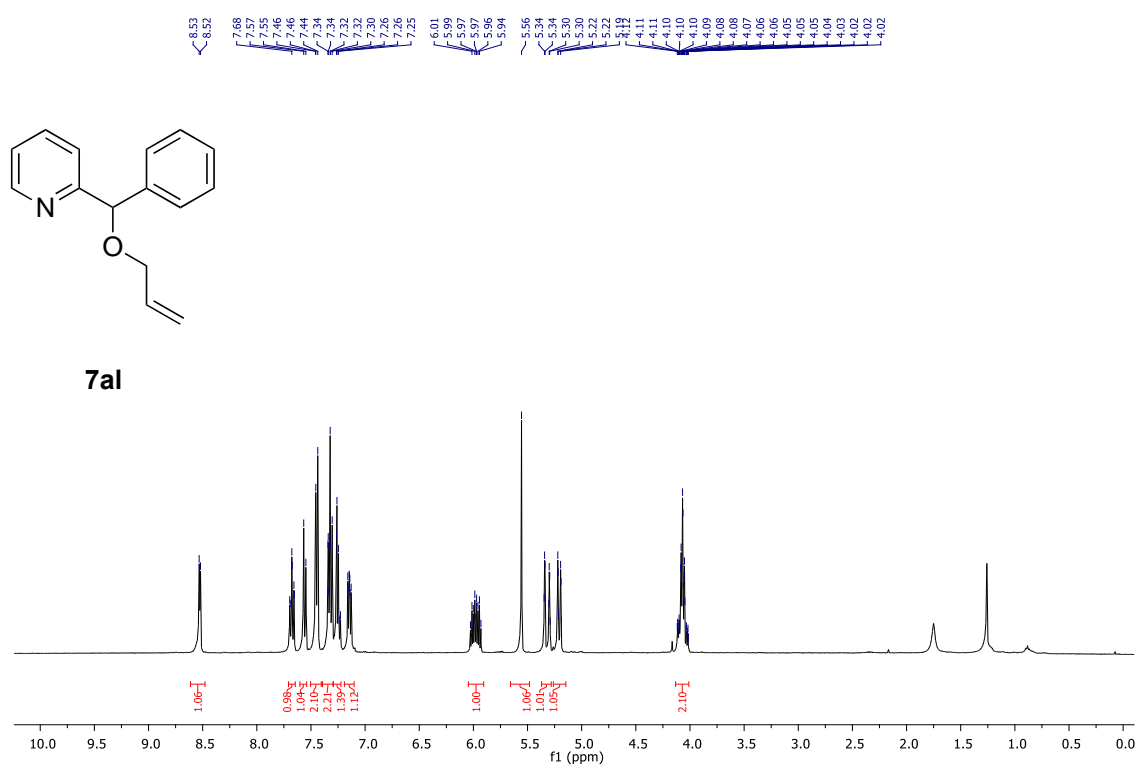

# <sup>13</sup>C NMR of **7al**

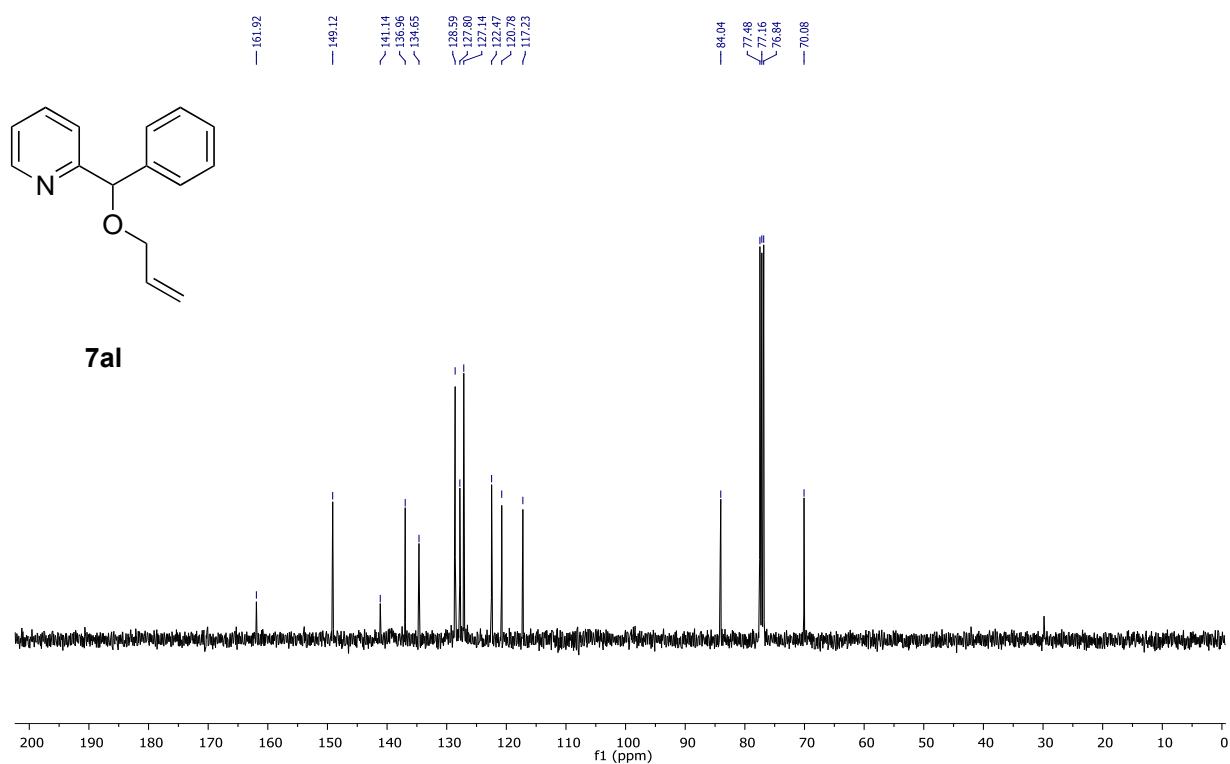

# <sup>1</sup>H NMR of **7am**

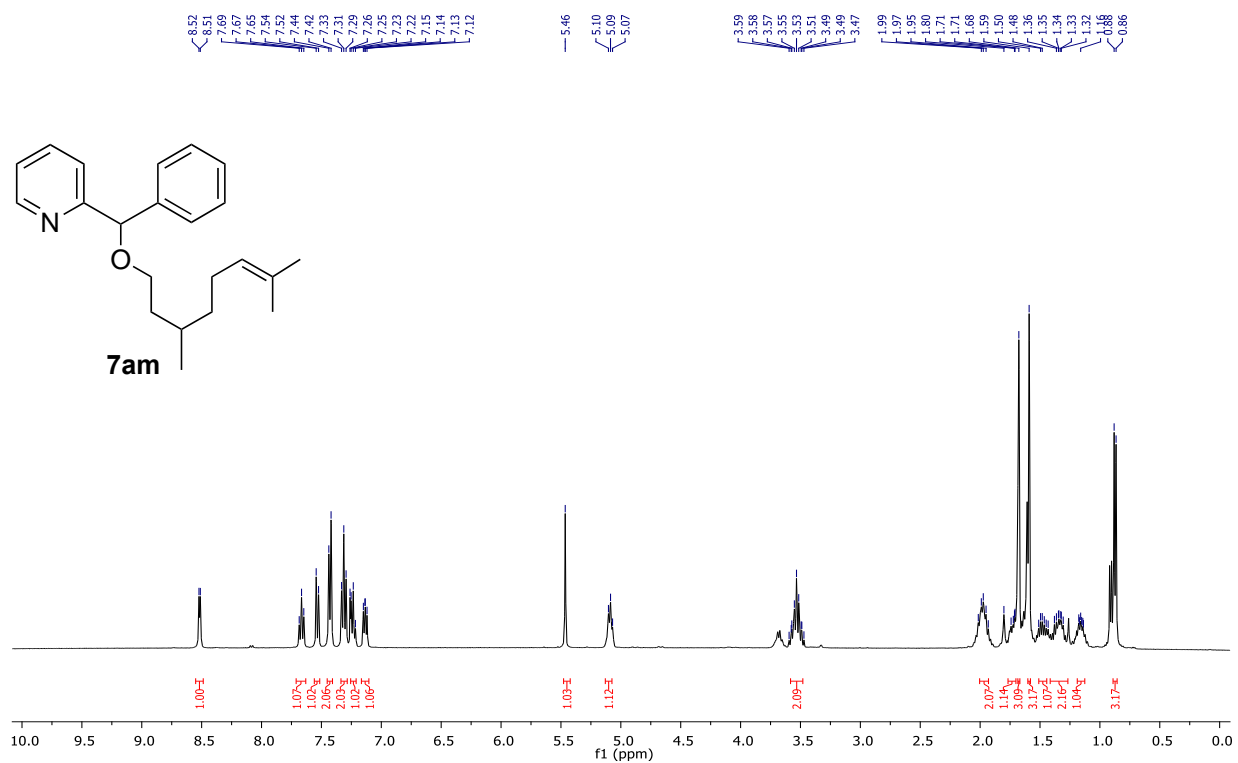

# <sup>13</sup>C NMR of **7am**

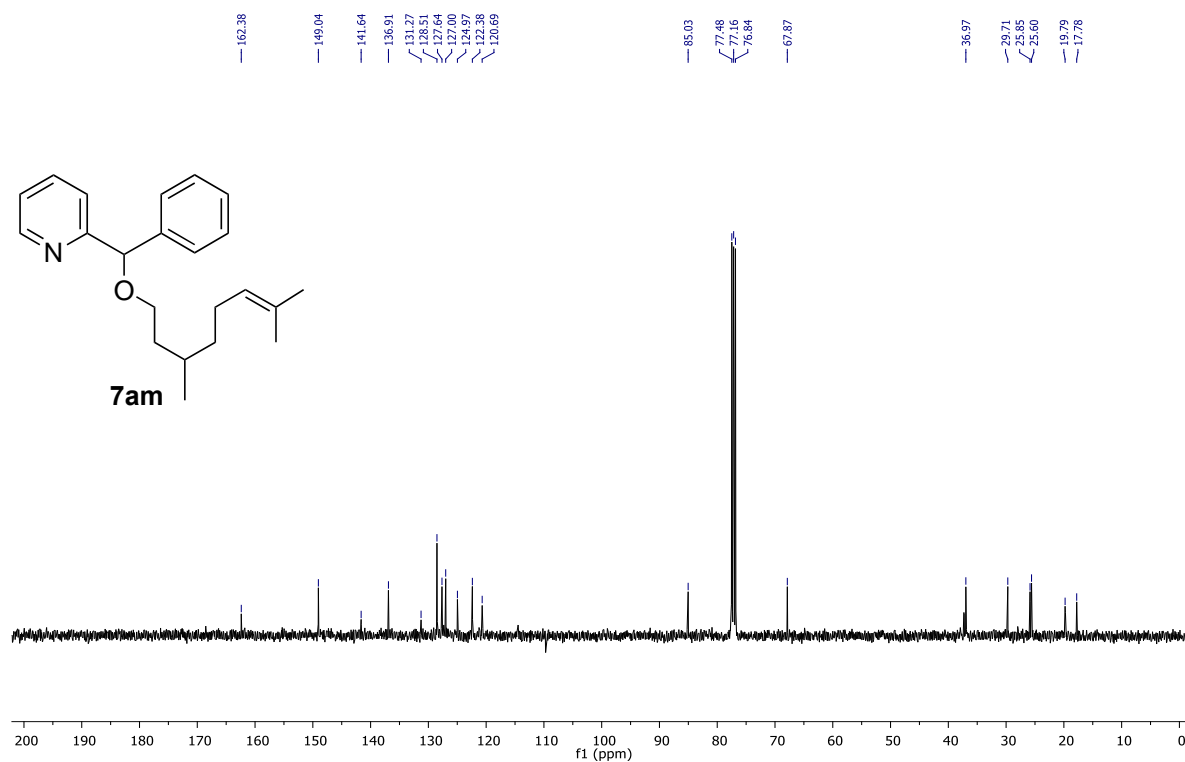

<sup>1</sup>H NMR of **7fn**

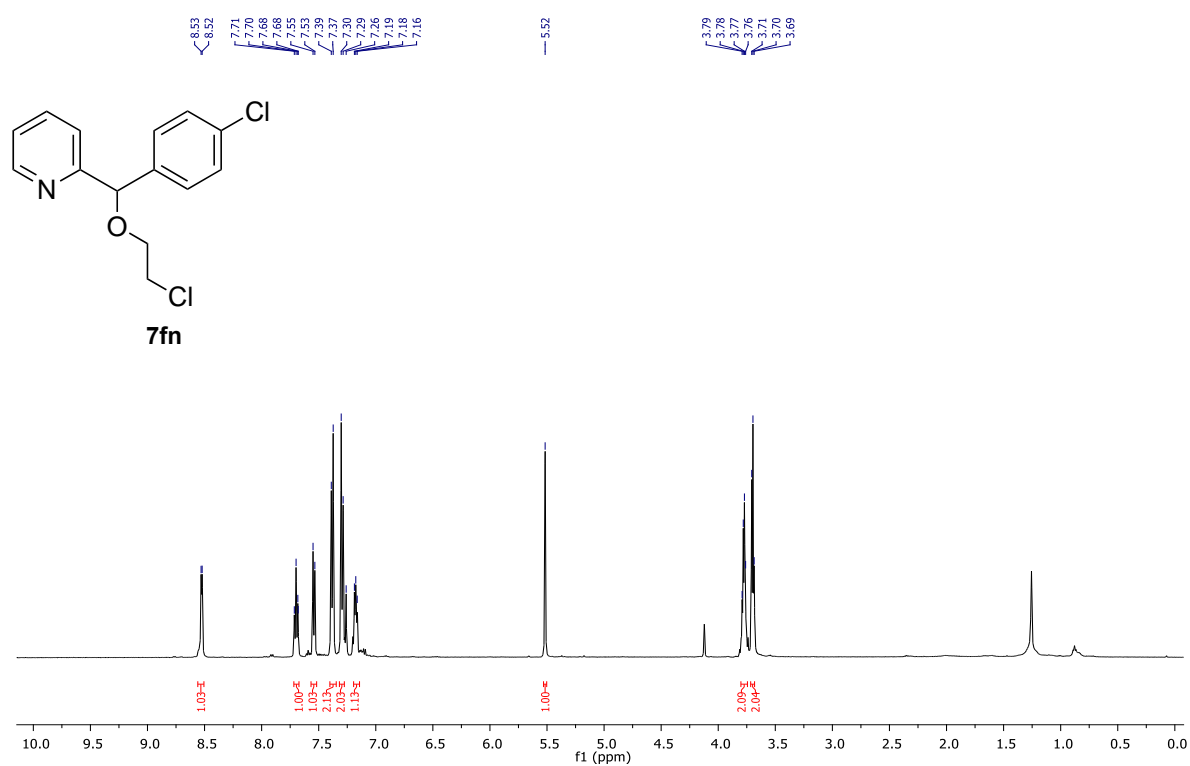

<sup>13</sup>C NMR of **7fn**

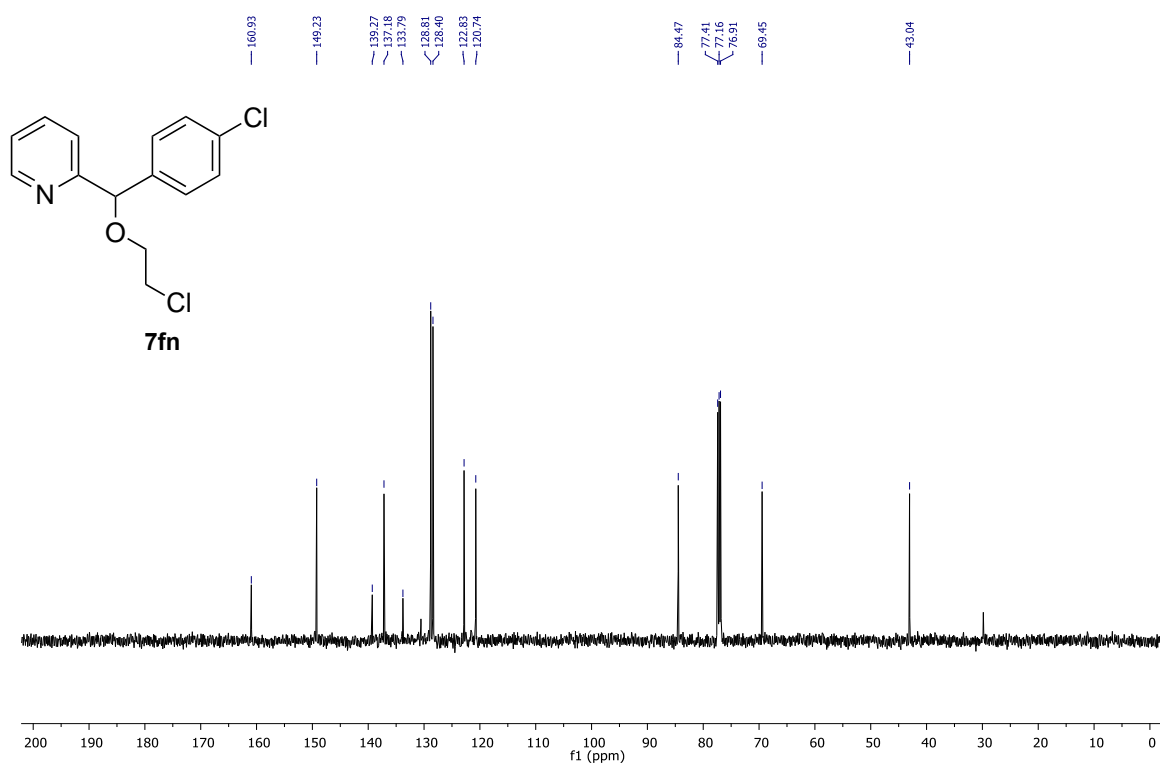

<sup>1</sup>H NMR of **8aa**

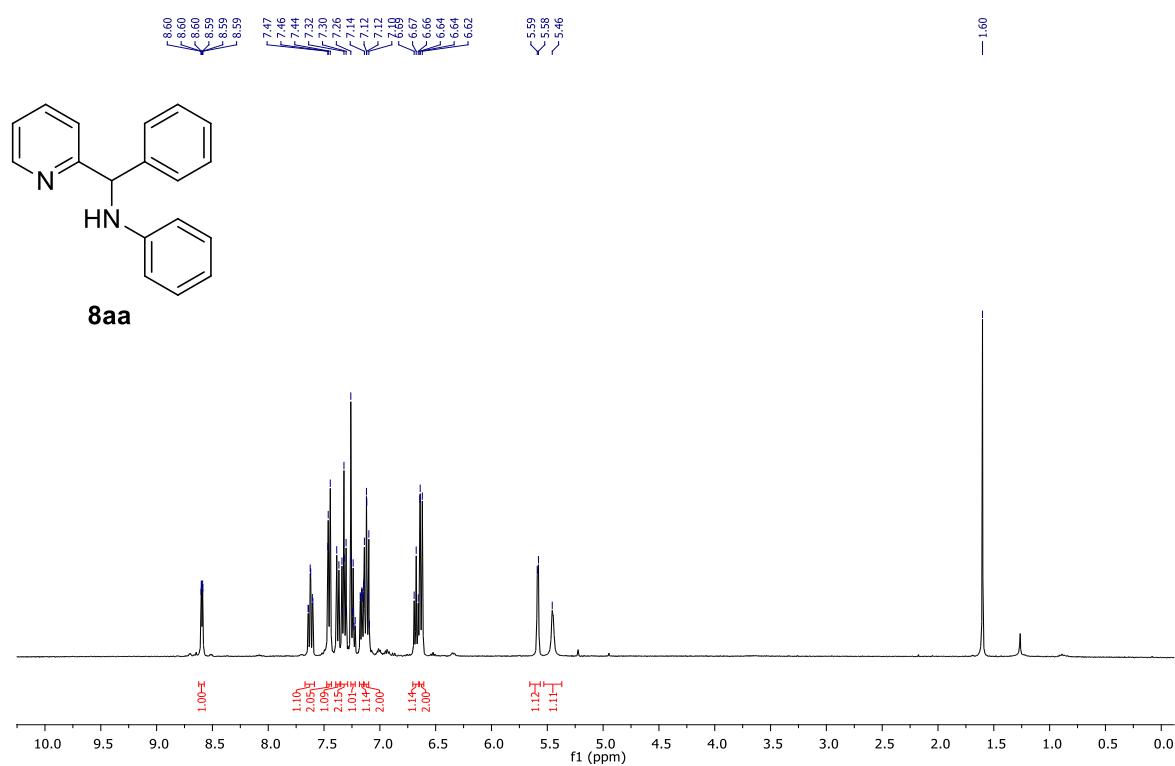

<sup>13</sup>C NMR of **8aa**

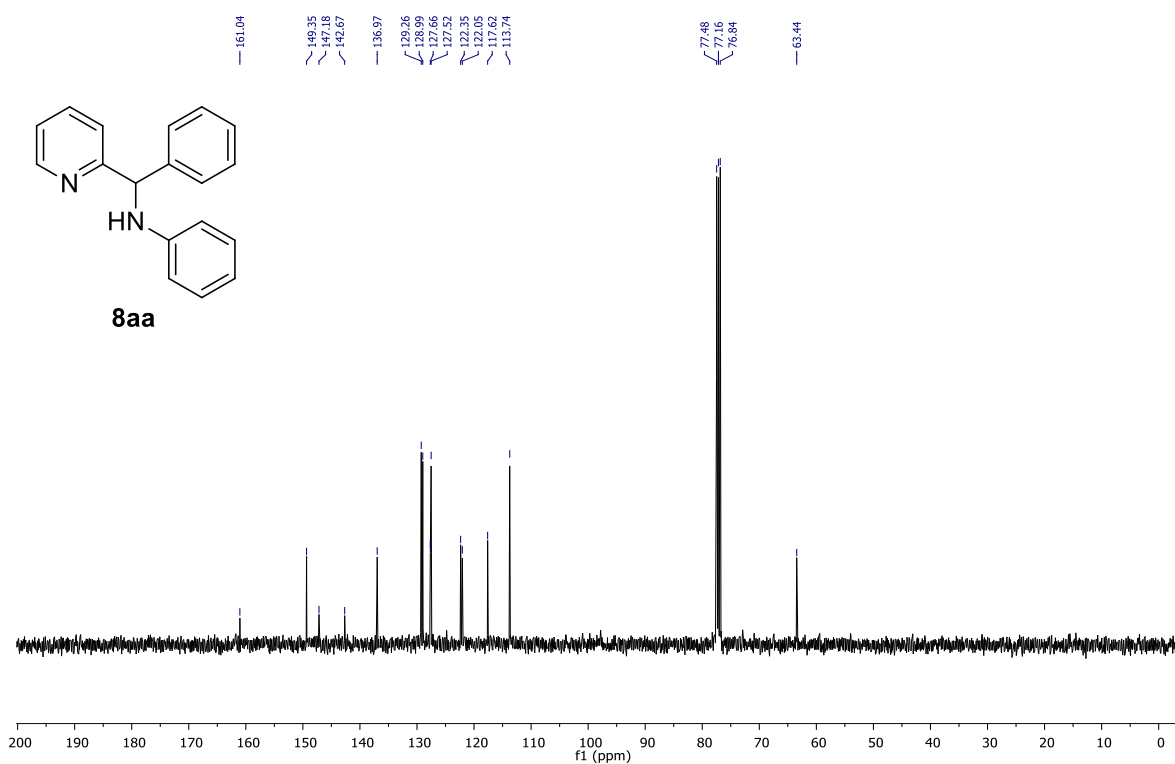

<sup>1</sup>H NMR of **8ab**

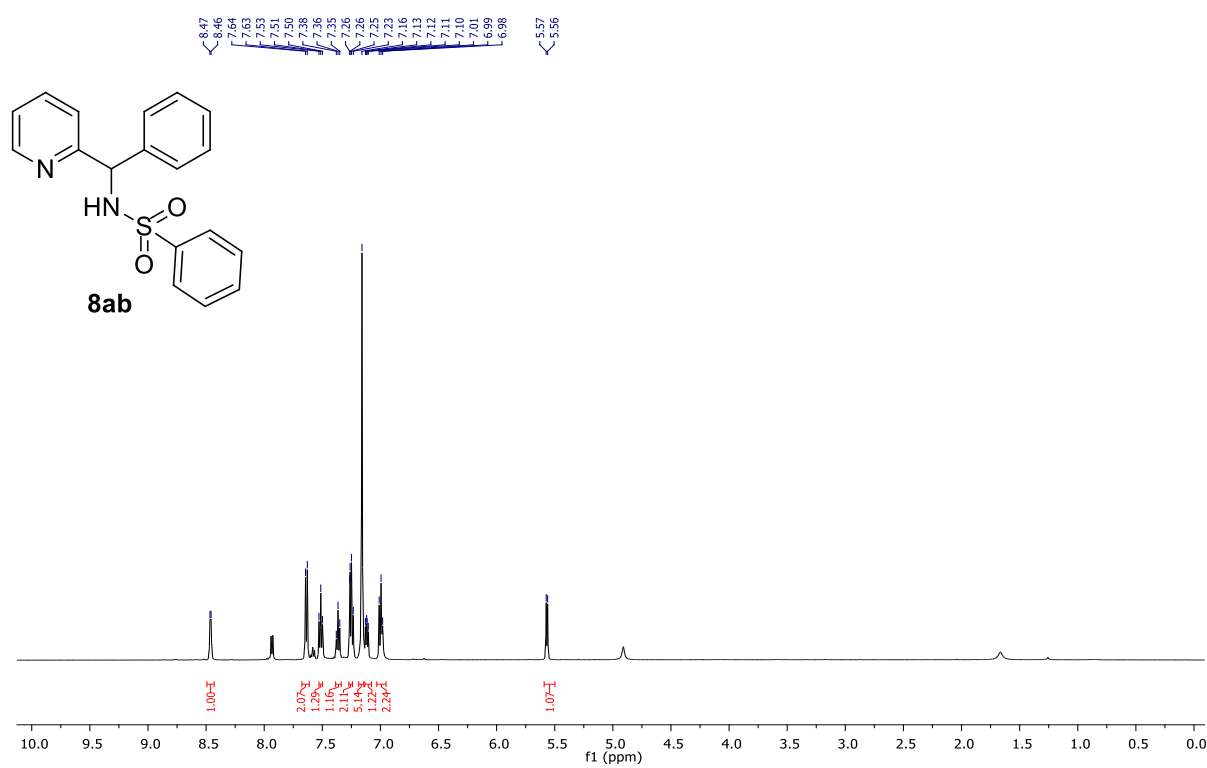

<sup>13</sup>C NMR of **8ab**

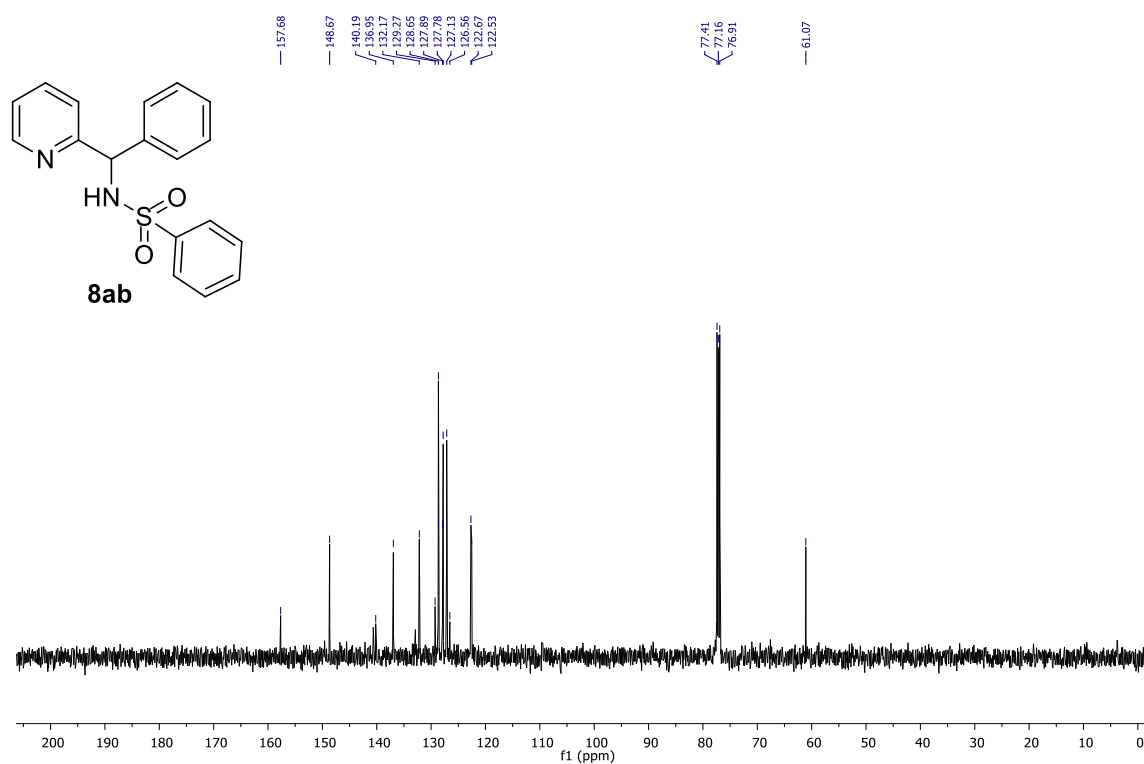

# <sup>1</sup>H NMR of **8ac**

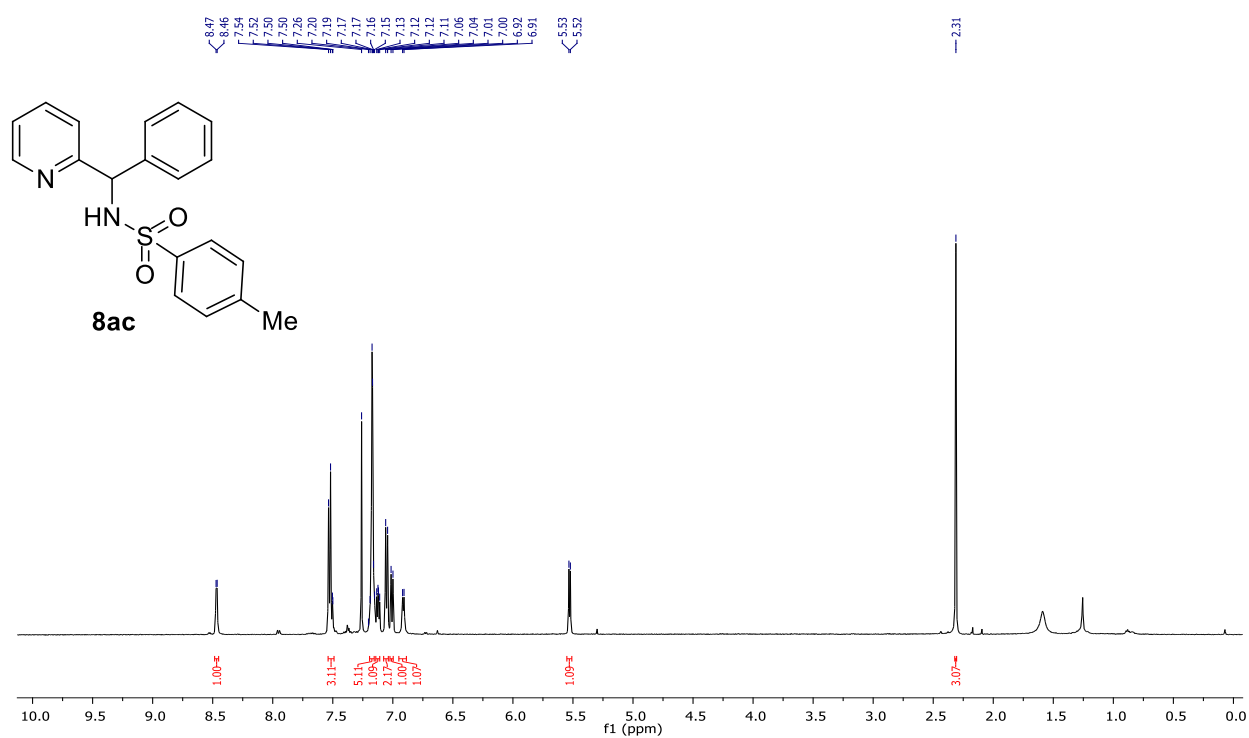

# <sup>13</sup>C NMR of **8ac**

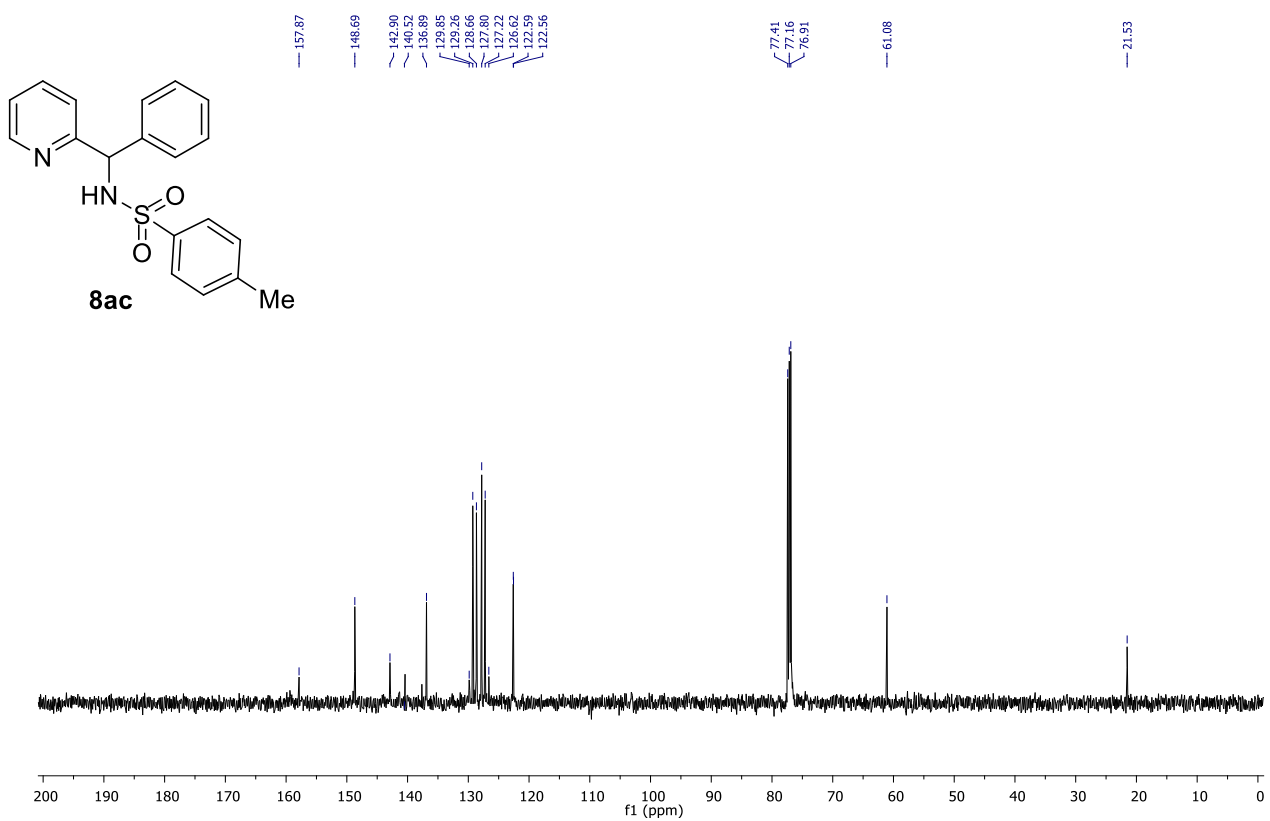

<sup>1</sup>H NMR of **8ad**

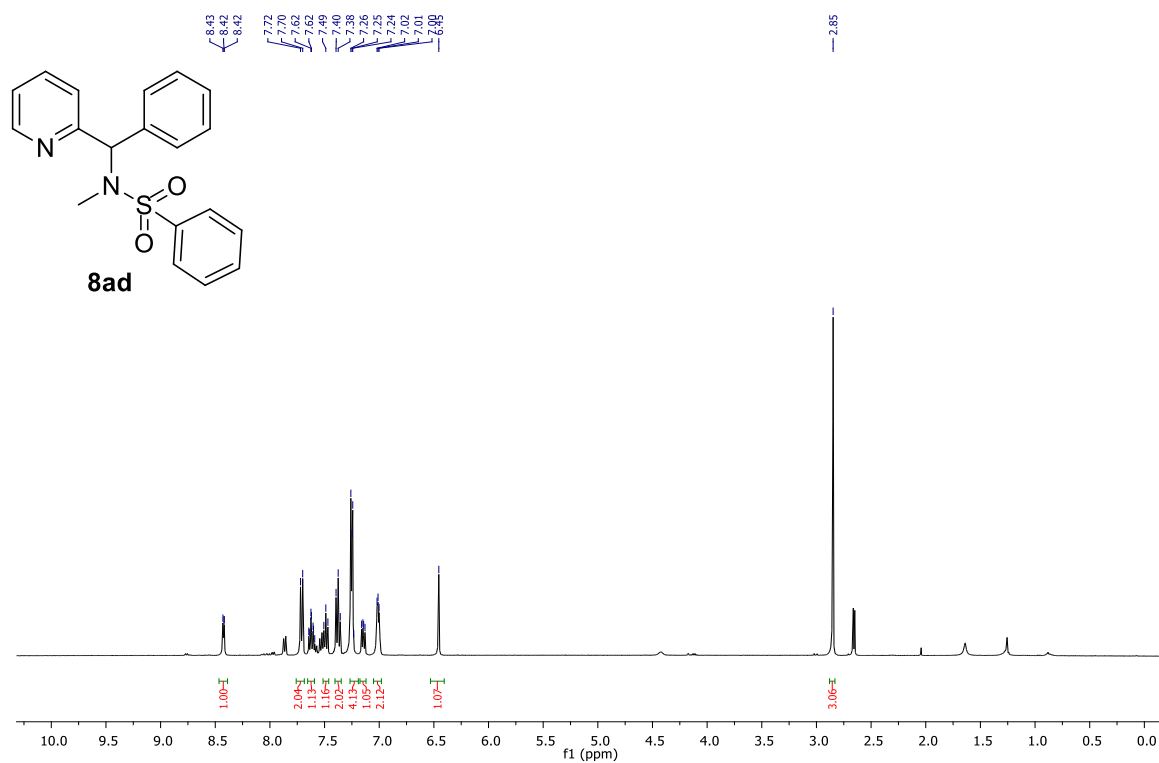

<sup>13</sup>C NMR of **8ad**

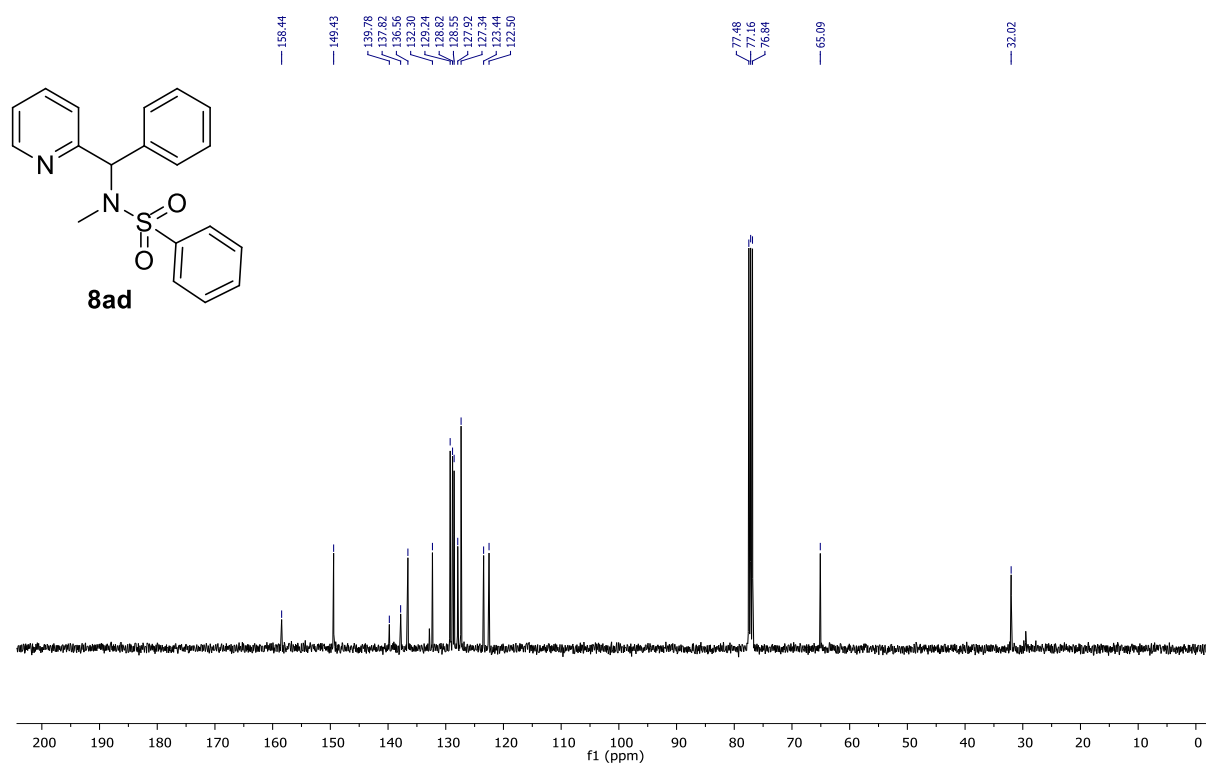

<sup>1</sup>H NMR of **8ae**

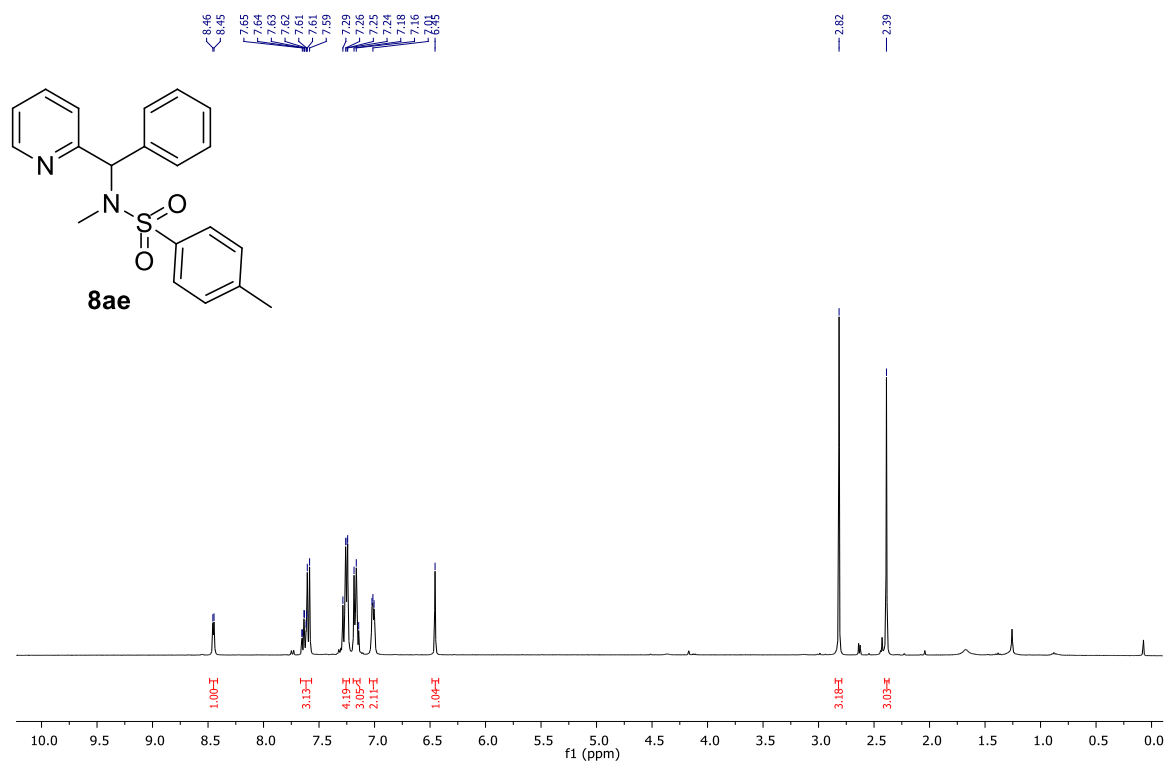

**<sup>13</sup>C NMR of 8ae**

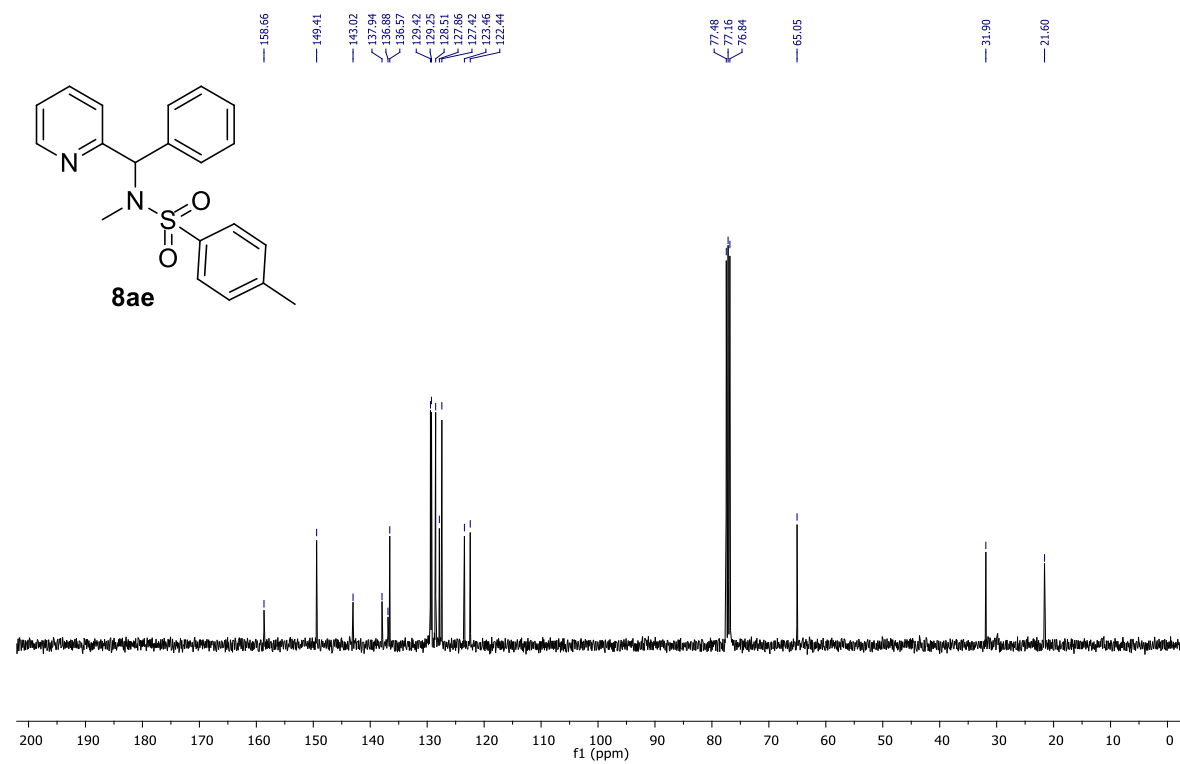

<sup>1</sup>H NMR of **8af**

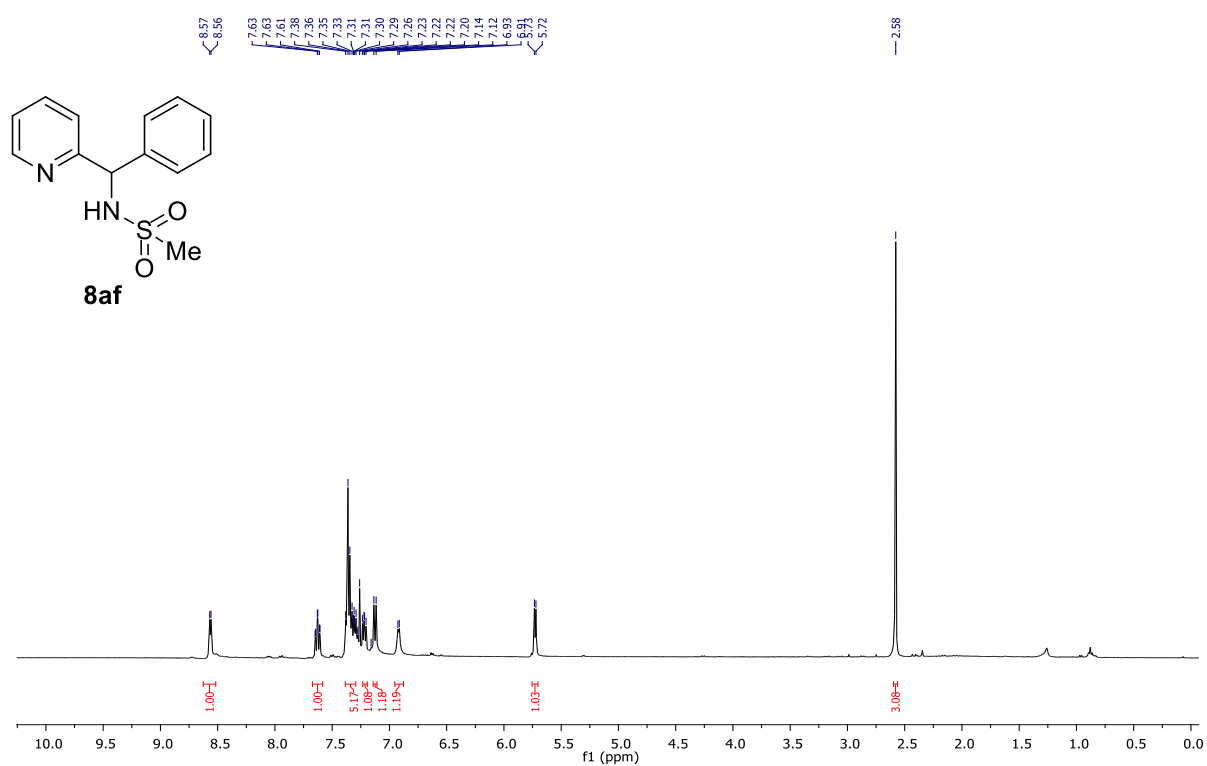

<sup>13</sup>C NMR of **8af**

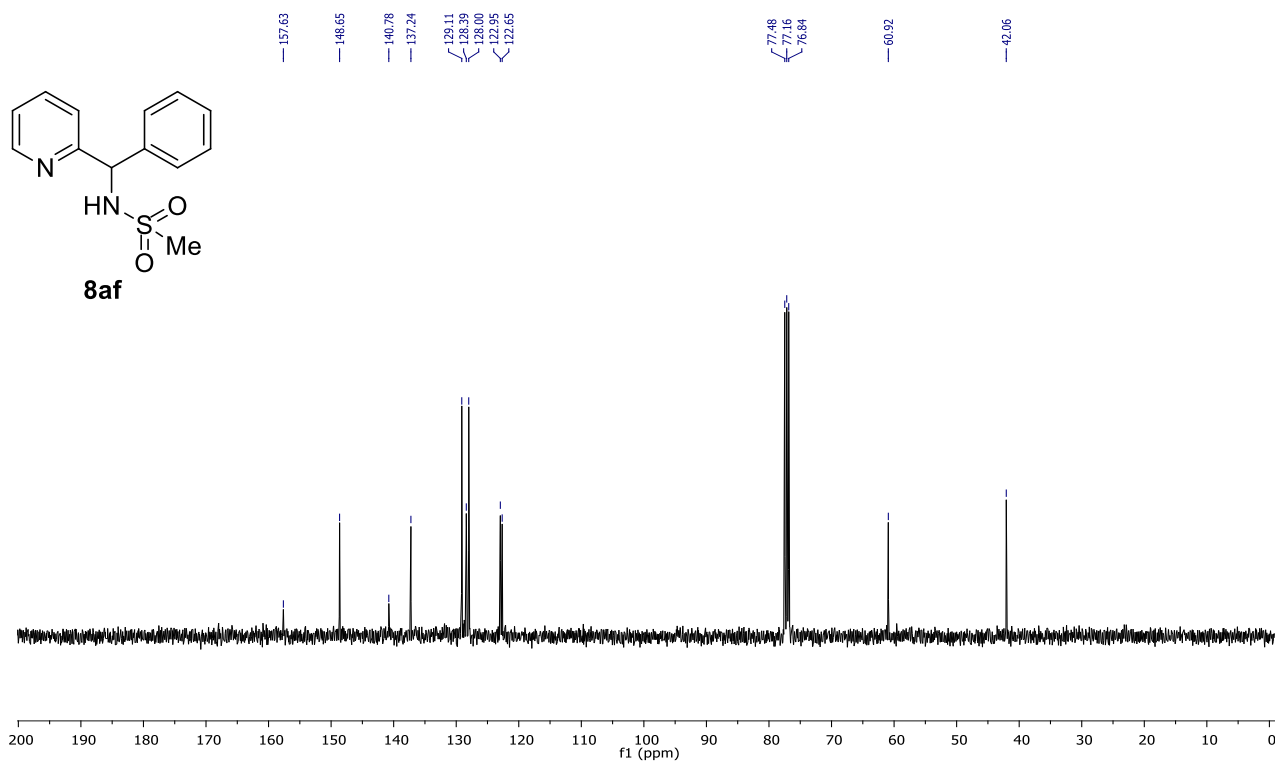

# <sup>1</sup>H NMR of **8ag**

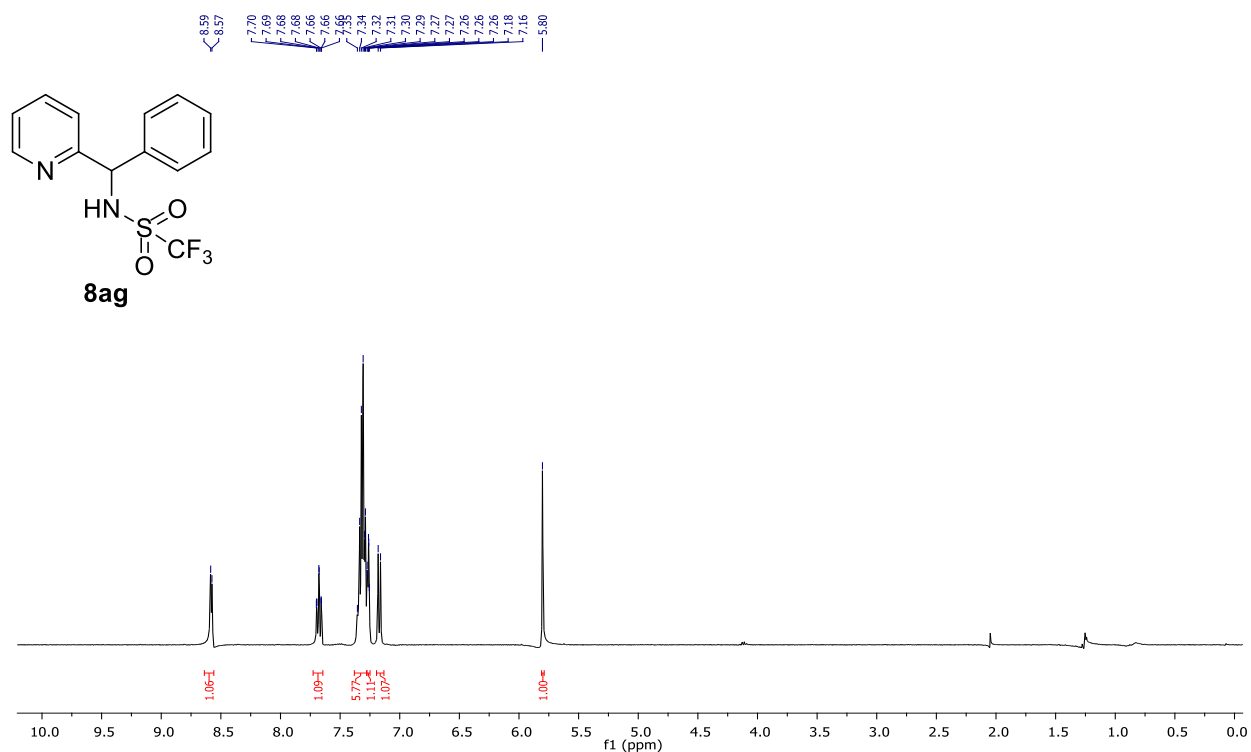

# <sup>13</sup>C NMR of **8ag**

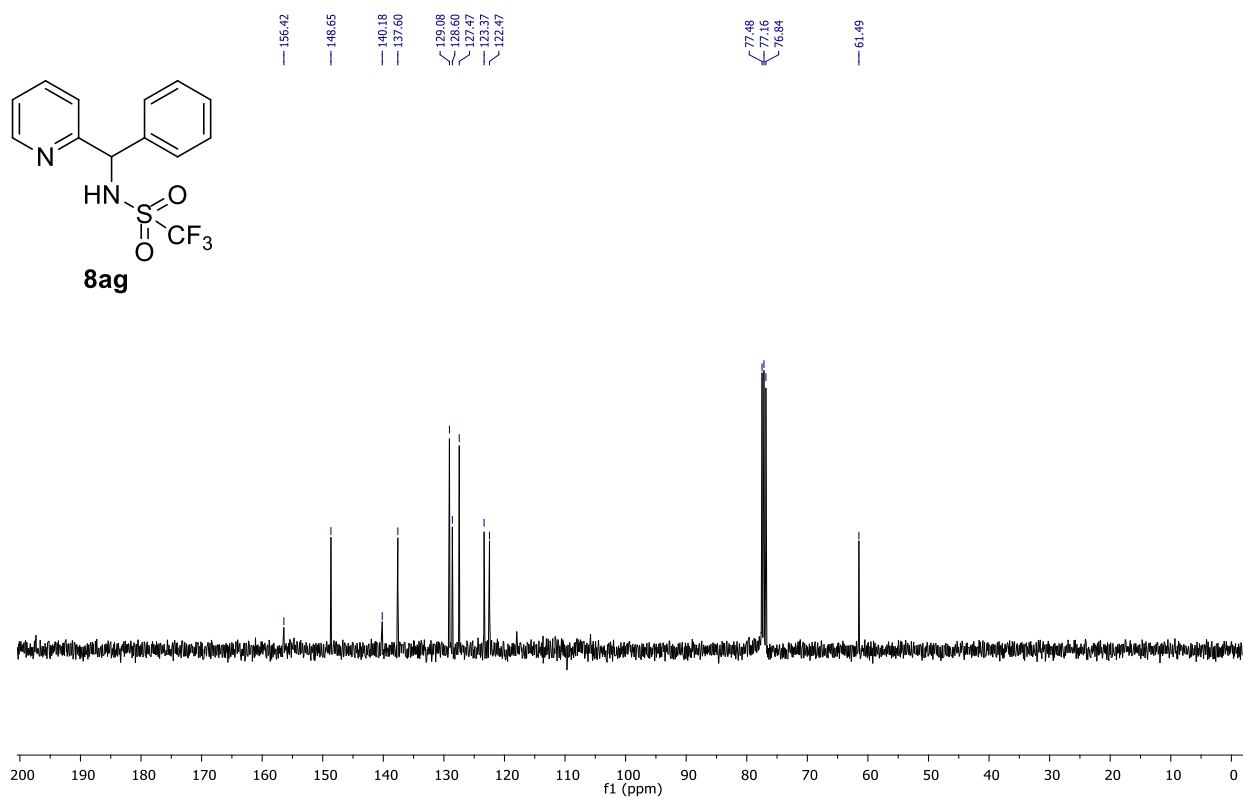

# <sup>1</sup>H NMR of **8ah**

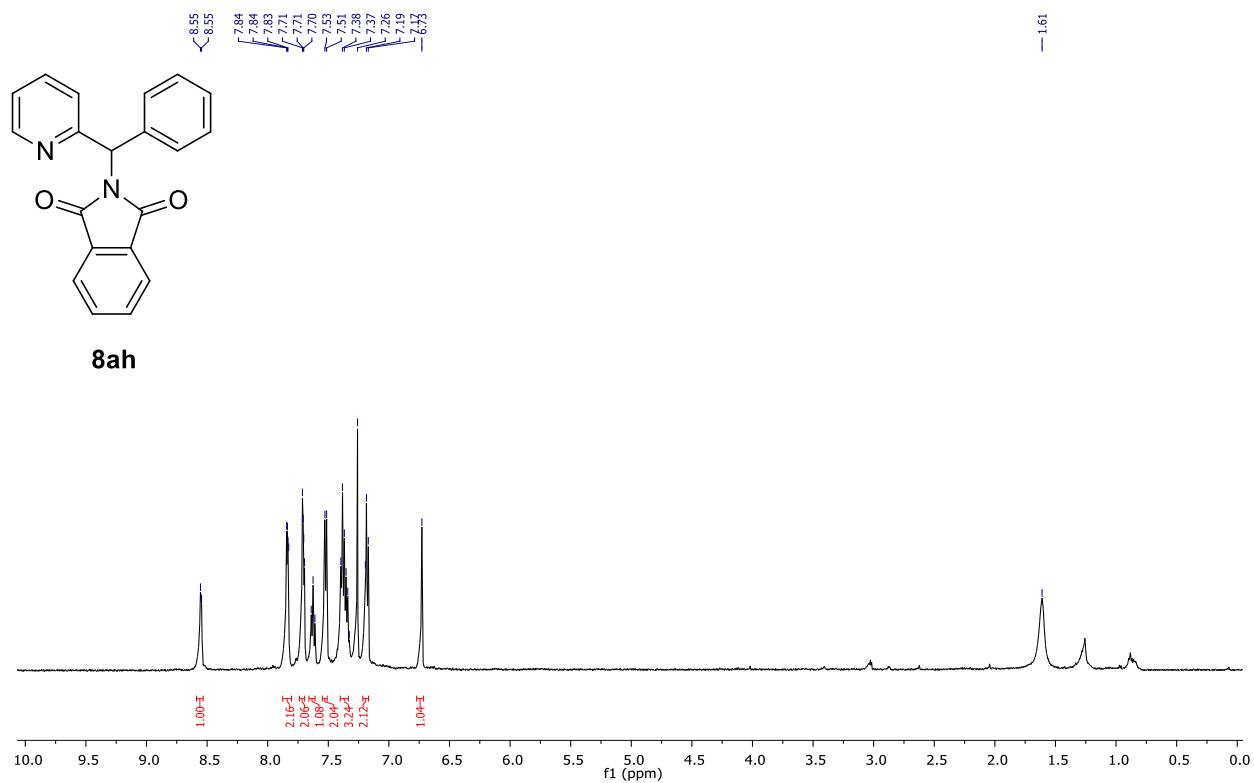

# <sup>13</sup>C NMR of **8ah**

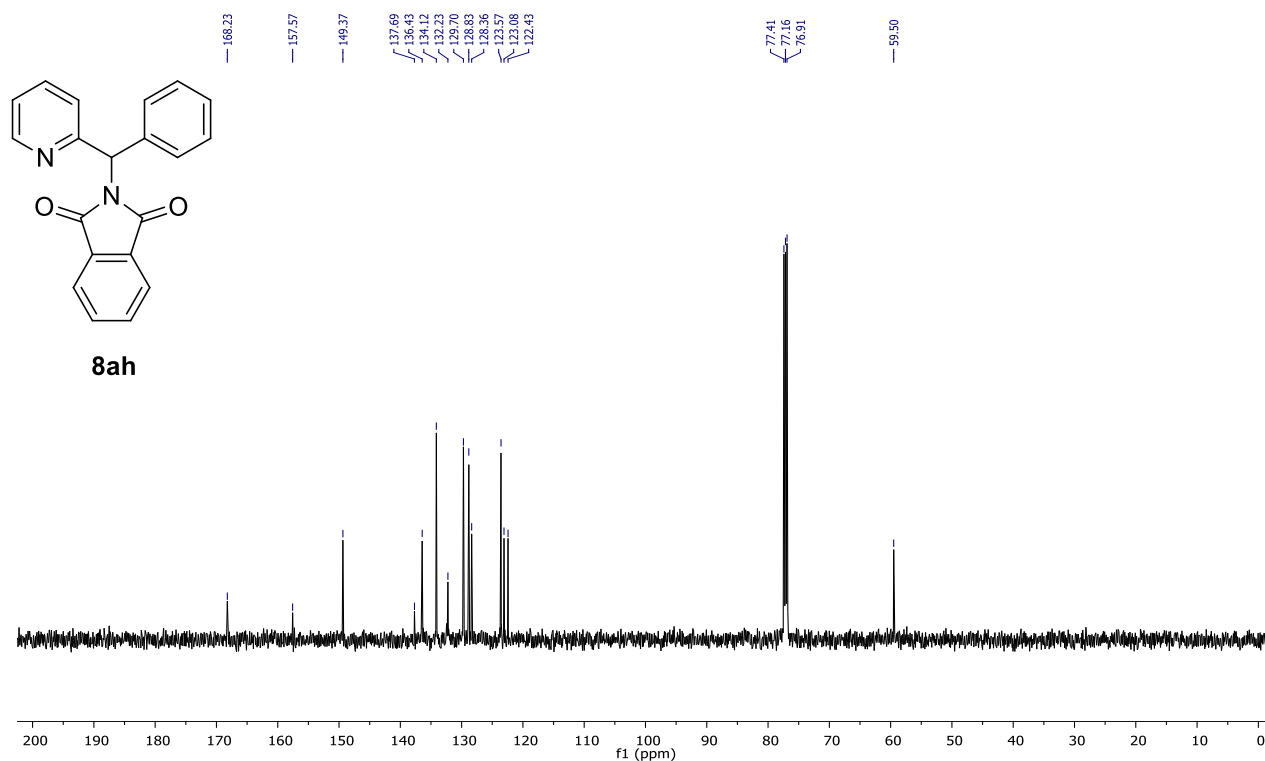

# <sup>1</sup>H NMR of **9aa**

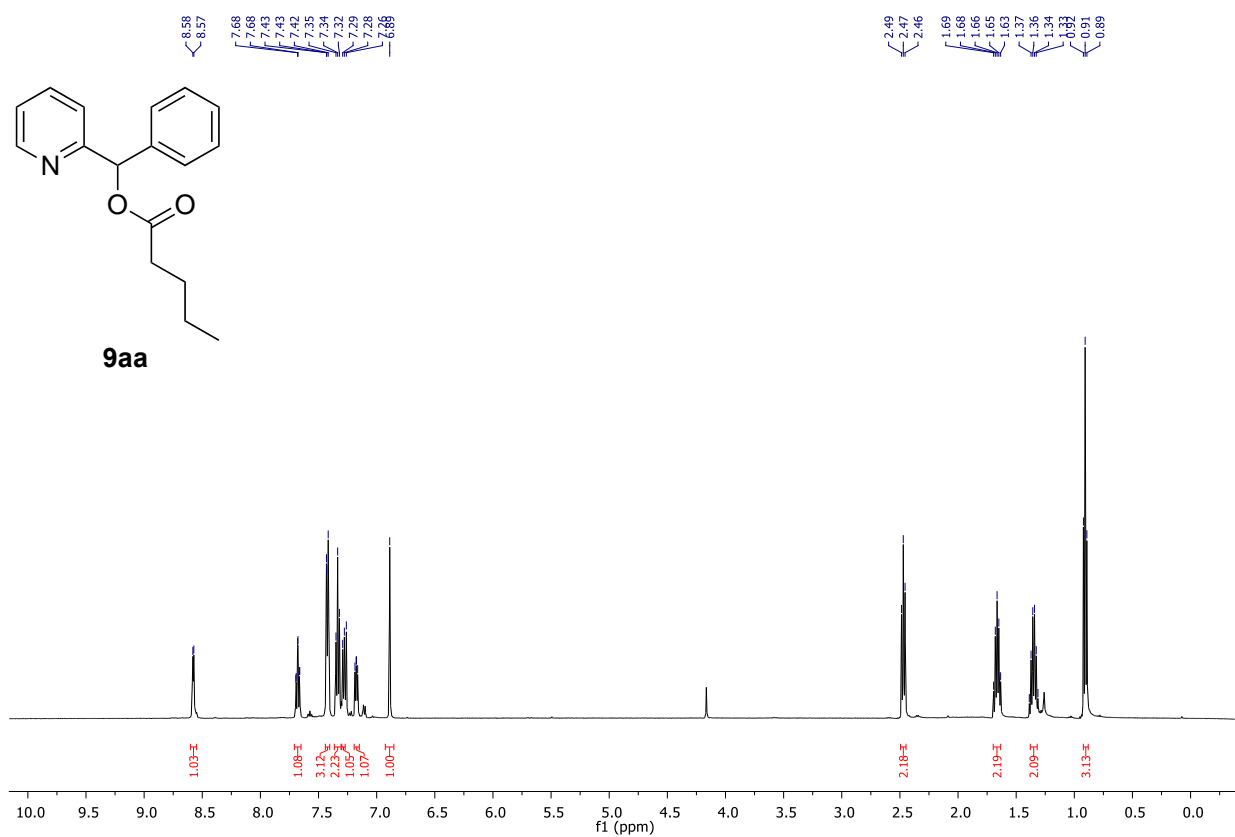

# <sup>13</sup>C NMR of **9aa**

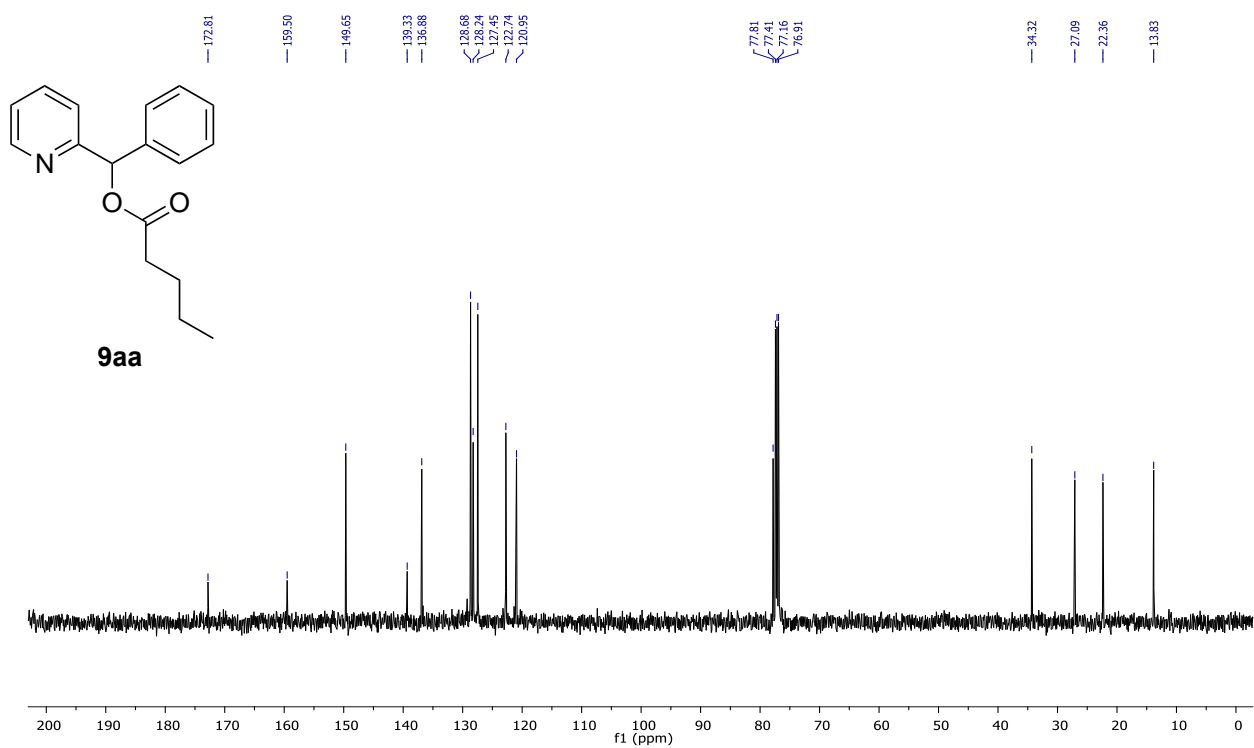

# <sup>1</sup>H NMR of 9ab

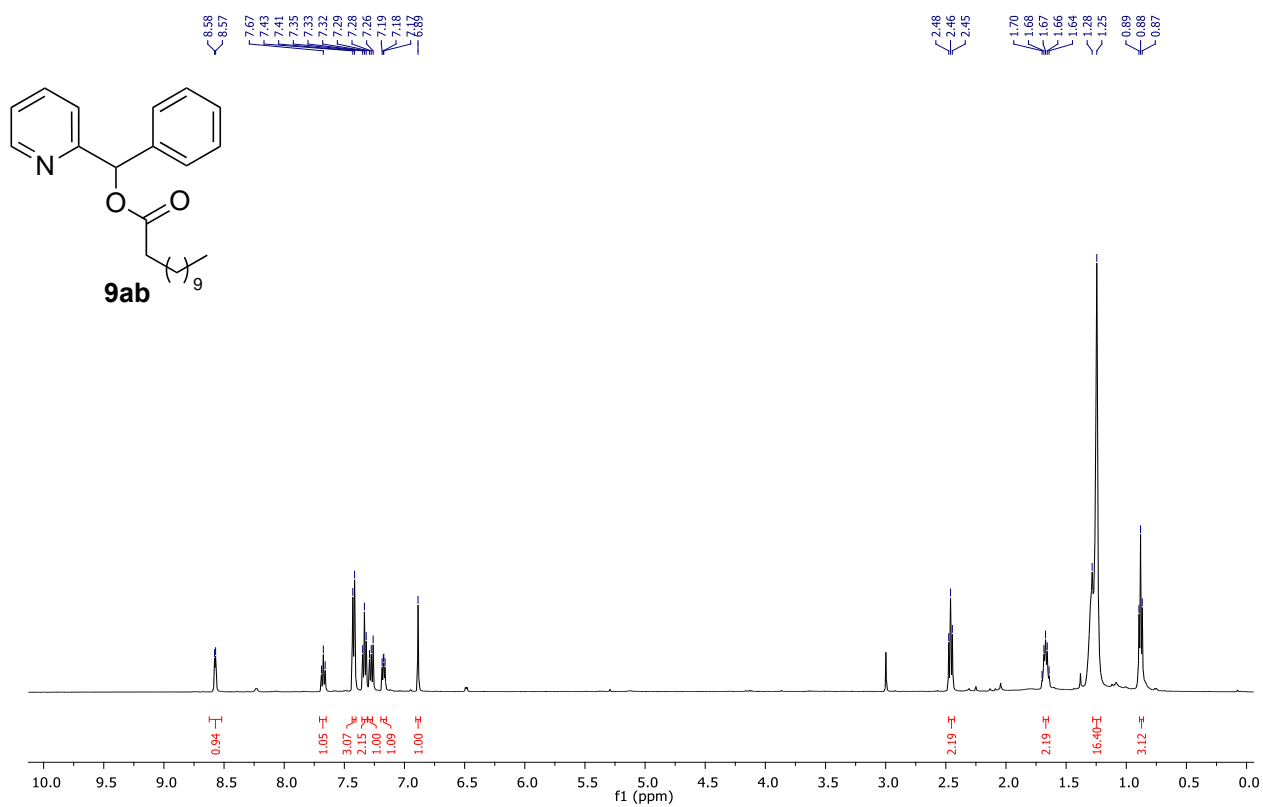

# <sup>13</sup>C NMR of 9ab

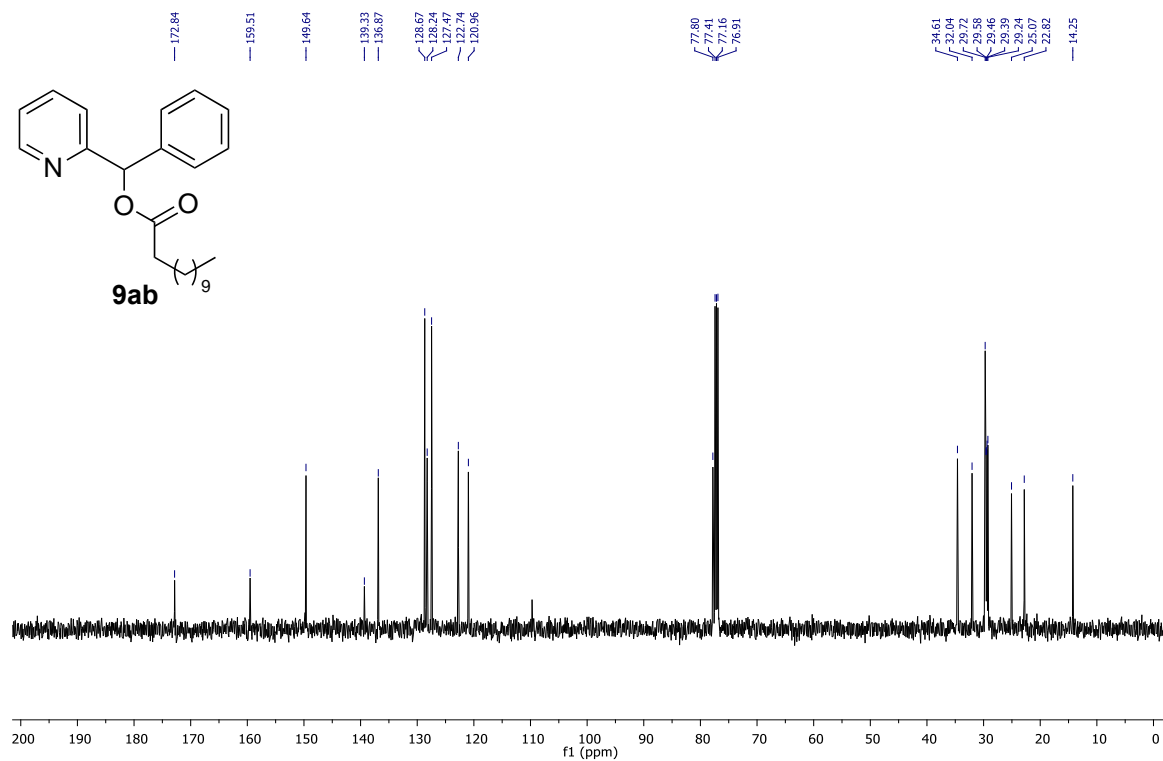

<sup>1</sup>H NMR of **9cc**

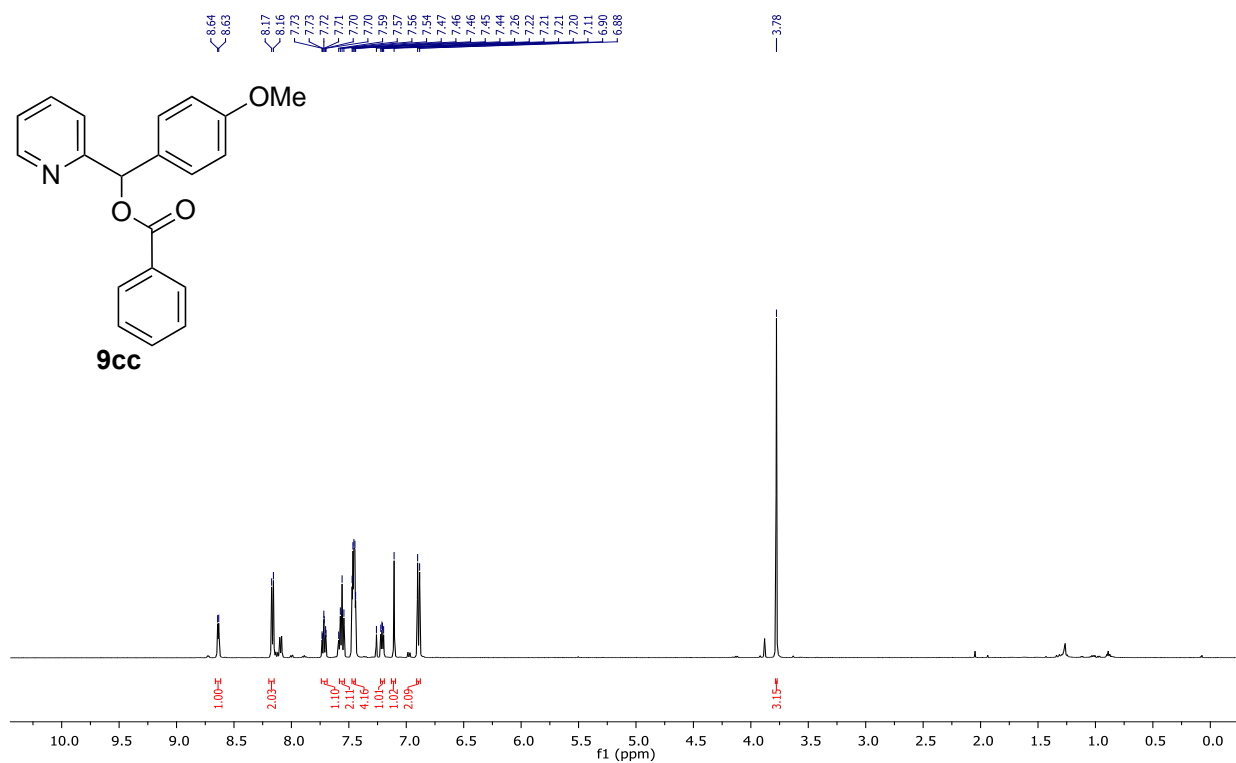

<sup>13</sup>C NMR of **9cc**

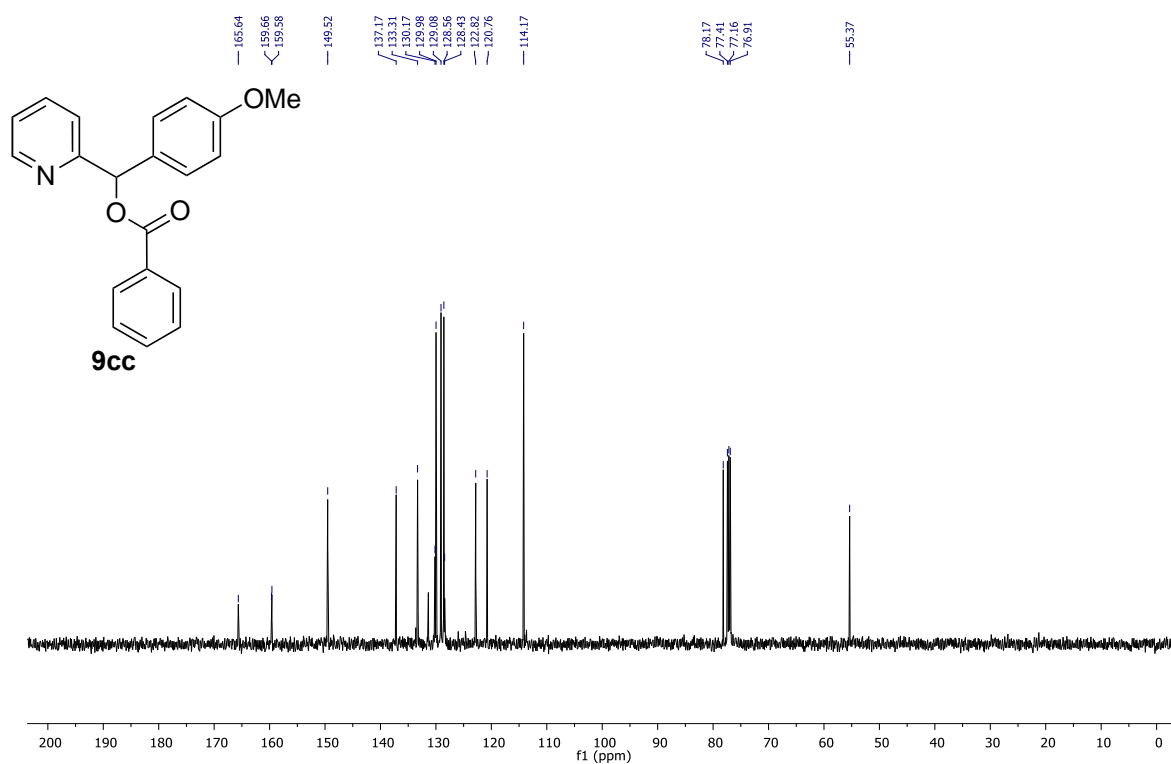

<sup>1</sup>H NMR of **11aa**

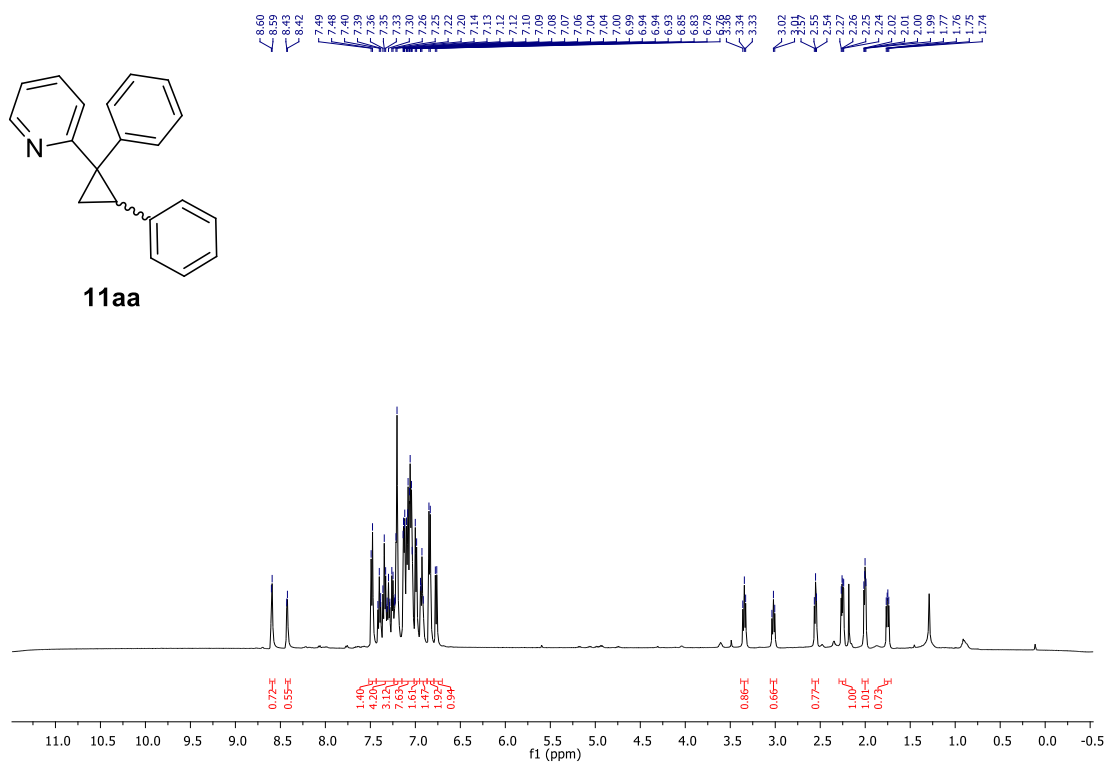

<sup>13</sup>C NMR of **11aa**

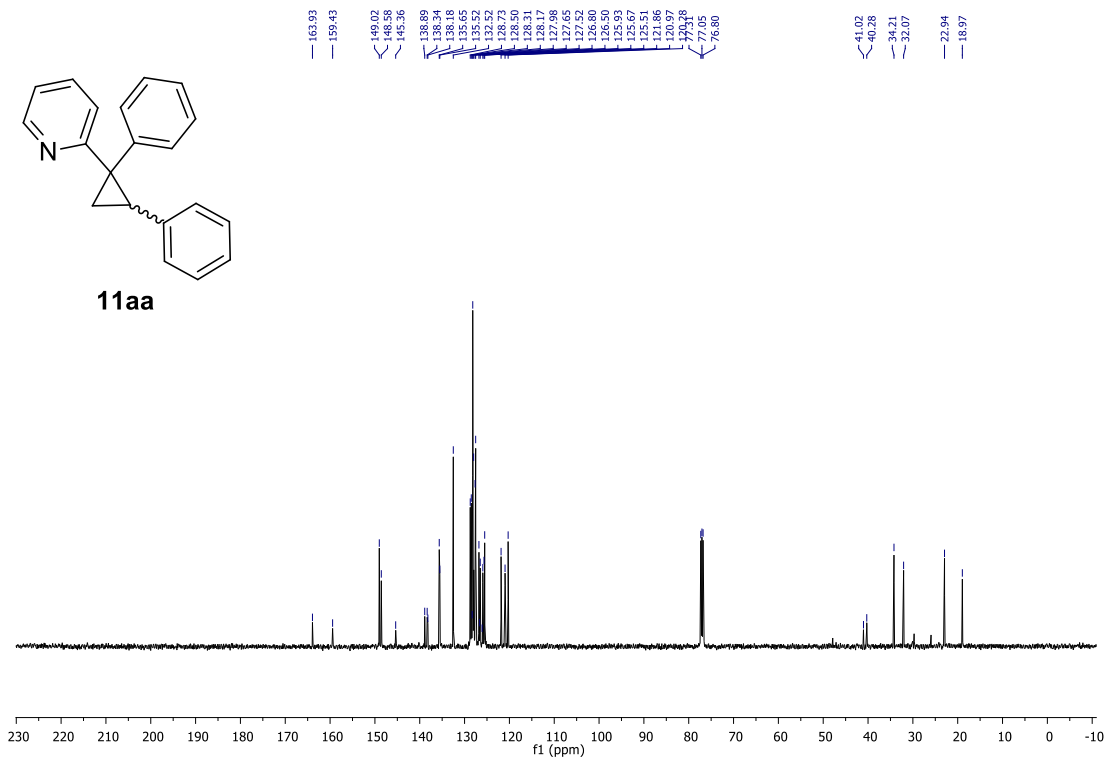

<sup>1</sup>H NMR of **11ba**

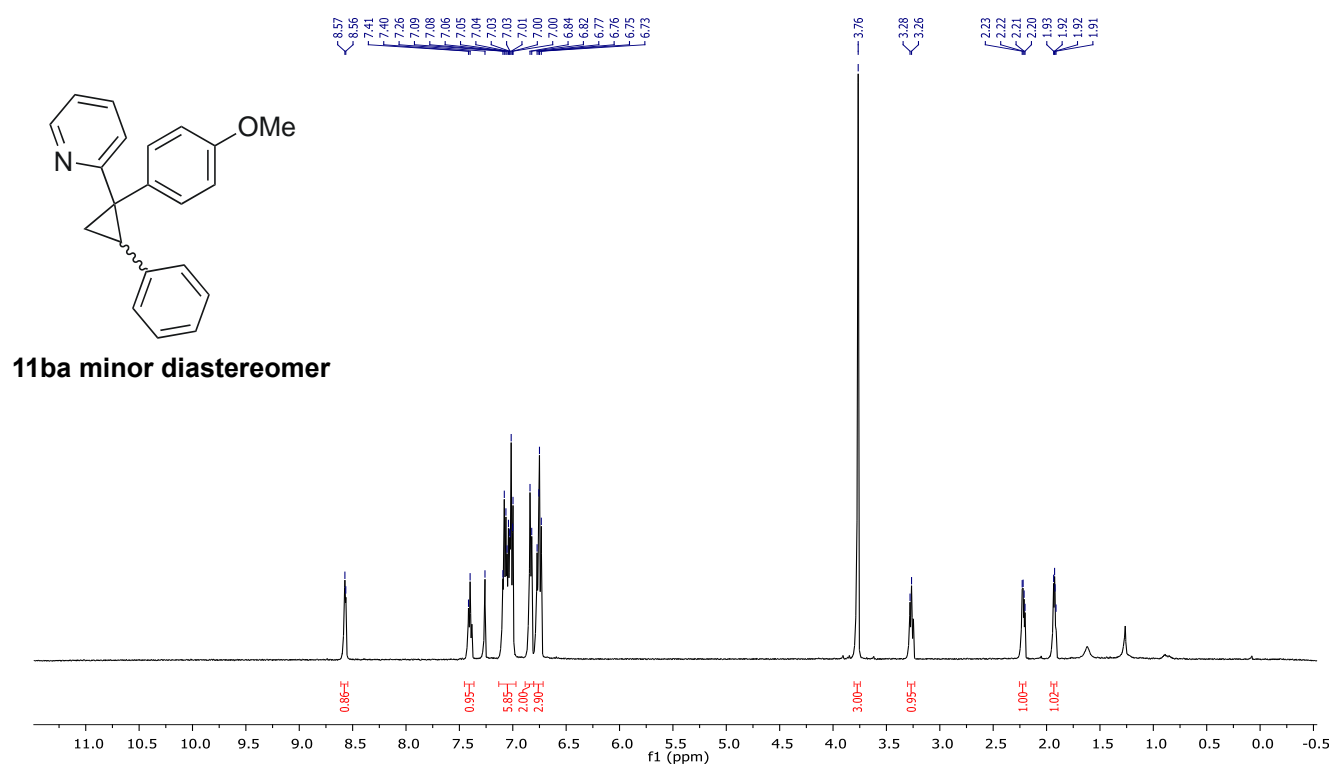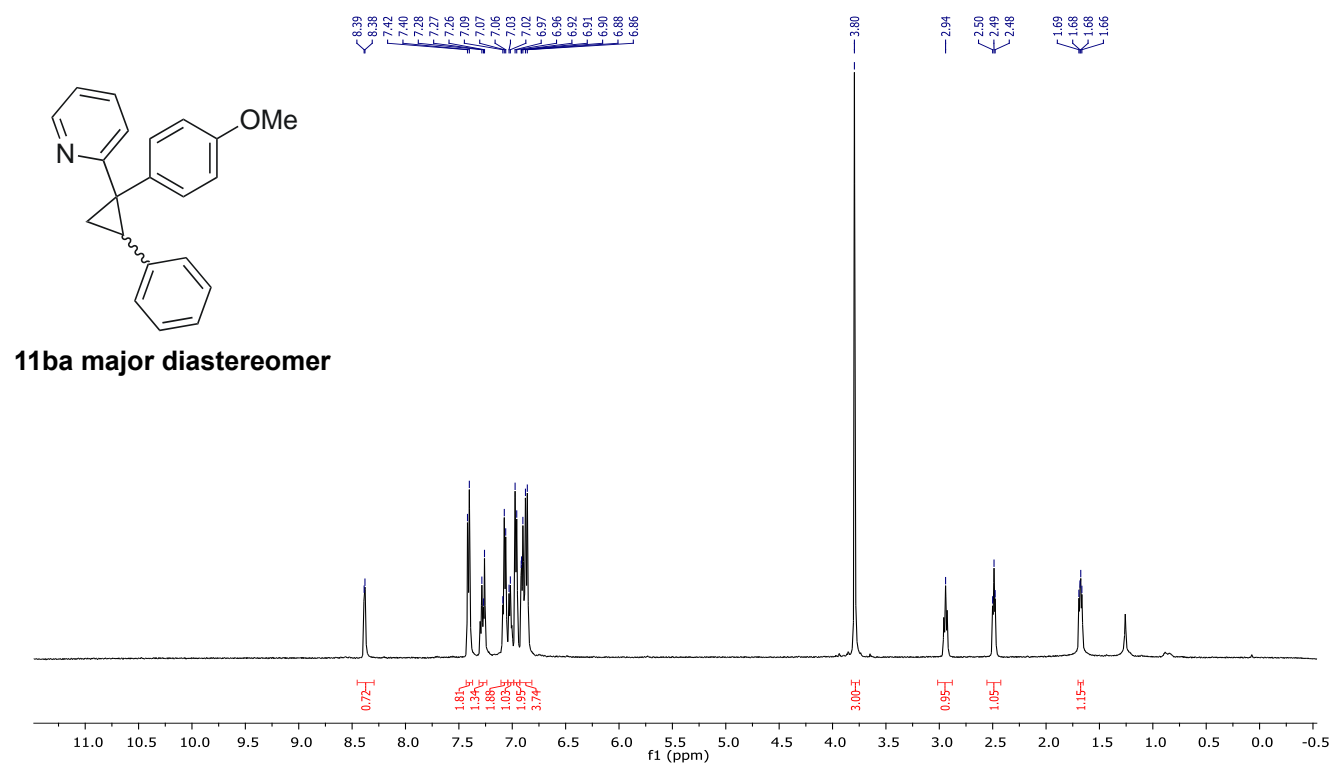

<sup>13</sup>C NMR of **11ba**

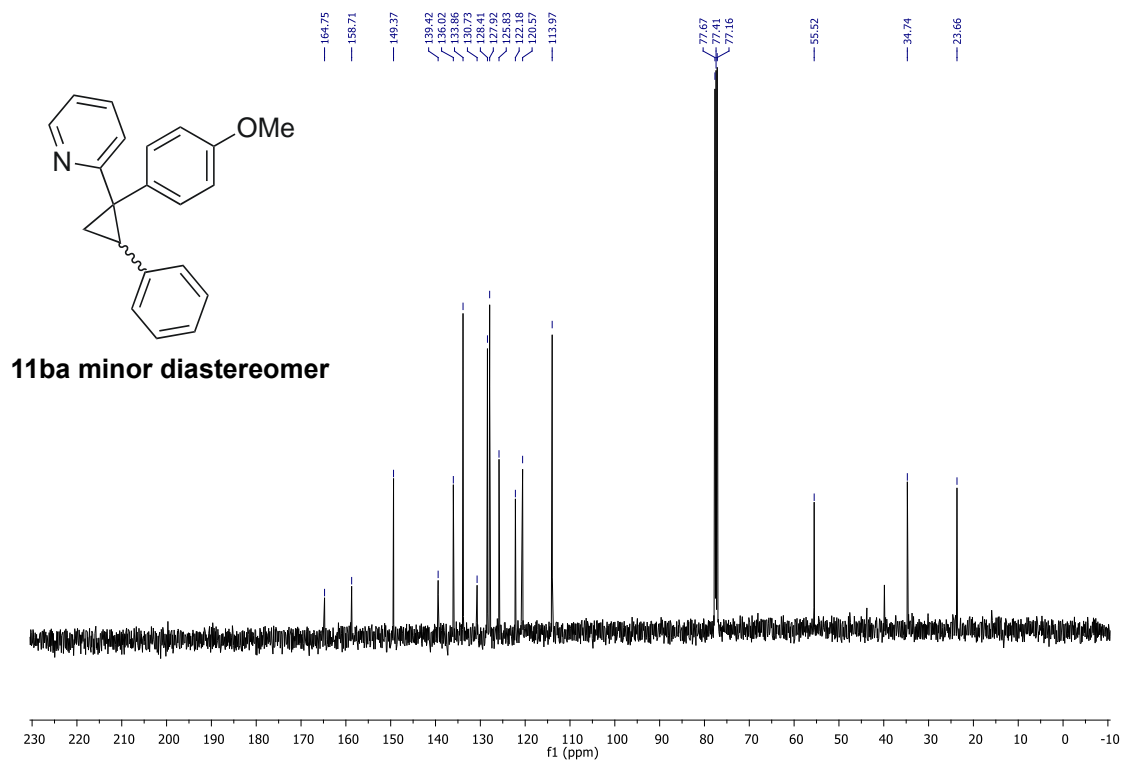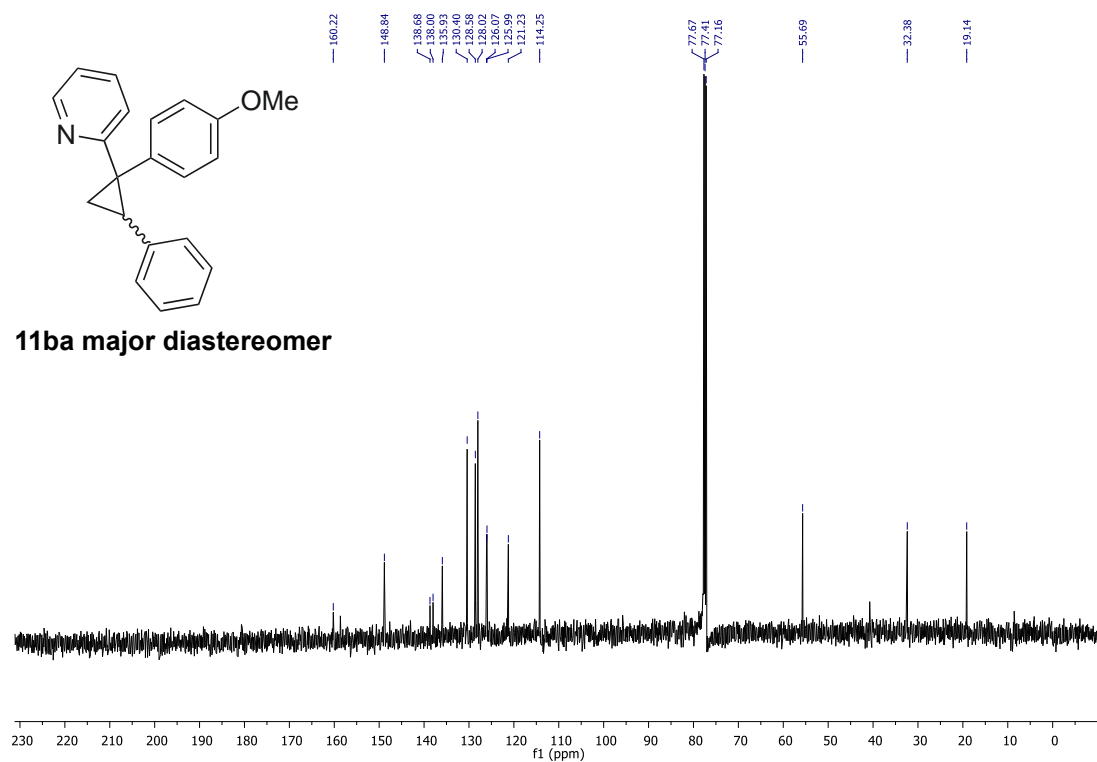

<sup>1</sup>H NMR of **11ea**

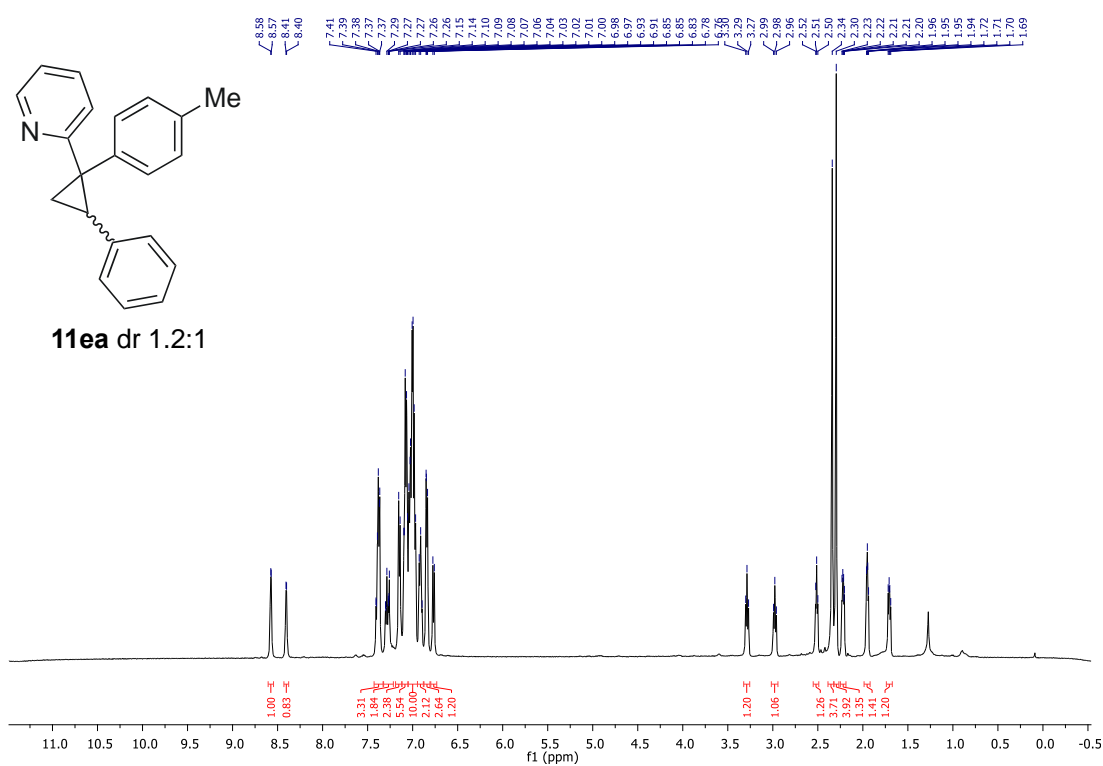

<sup>13</sup>C NMR of **11ea**

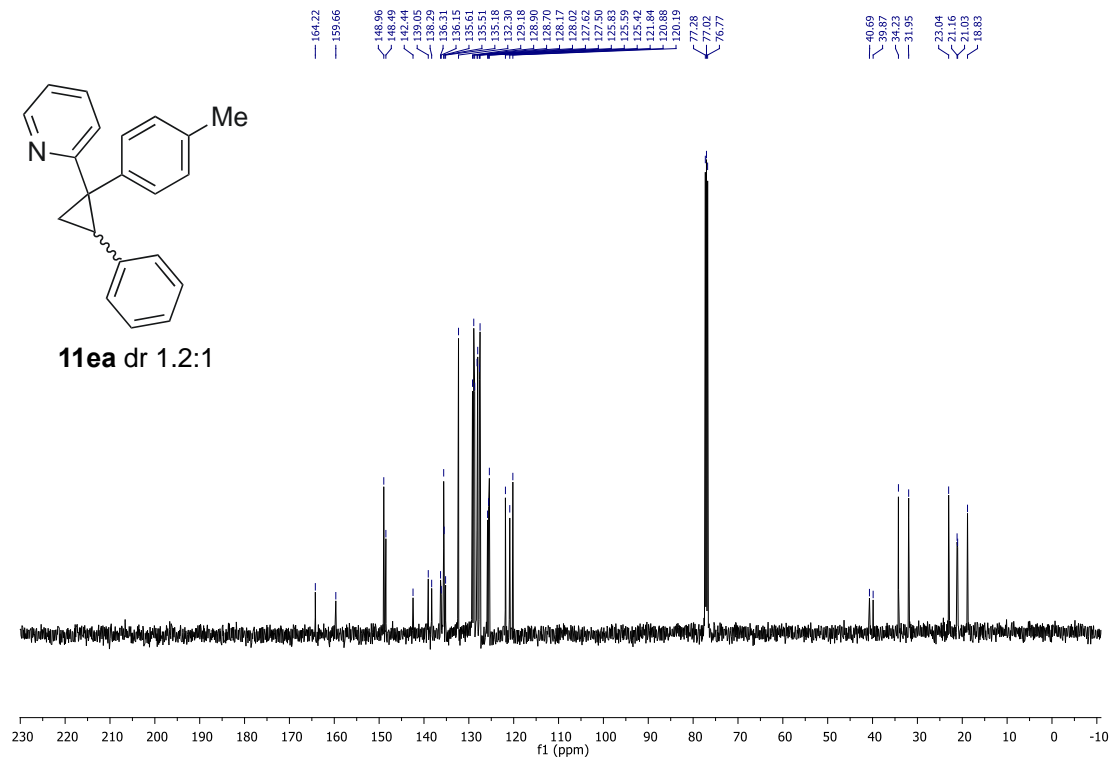

<sup>1</sup>H NMR of **11ga**

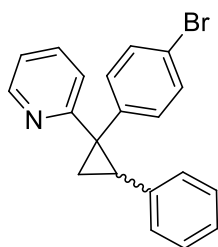

**11ga, major diastereomer**

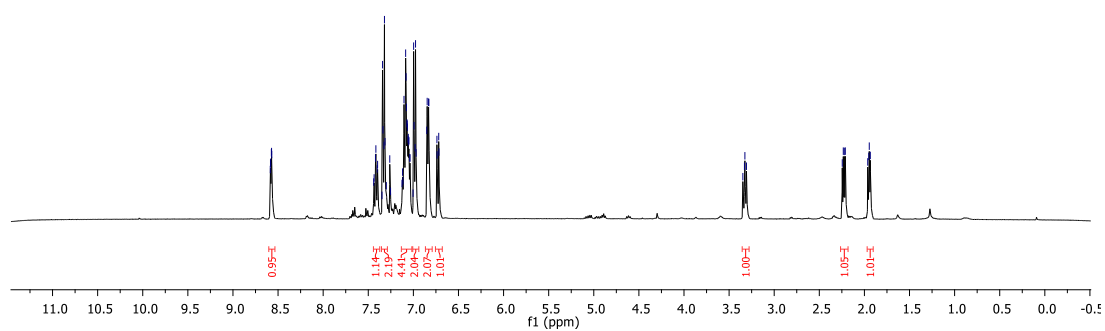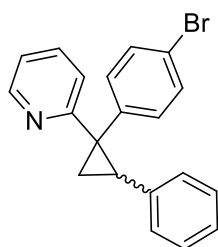

**11ga, minor diastereomer**

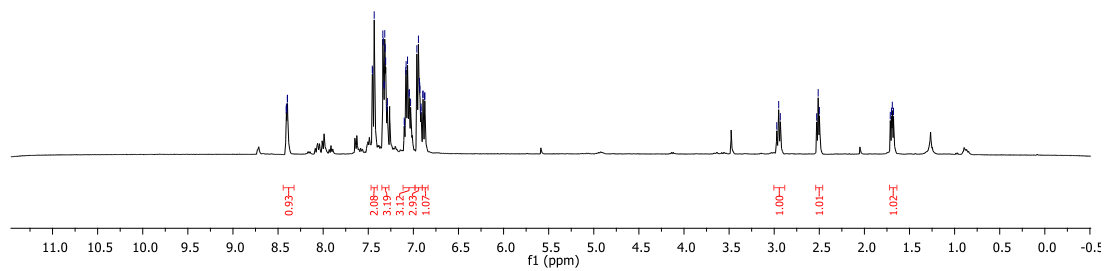

$^{13}\text{C}$  NMR of **11ga**

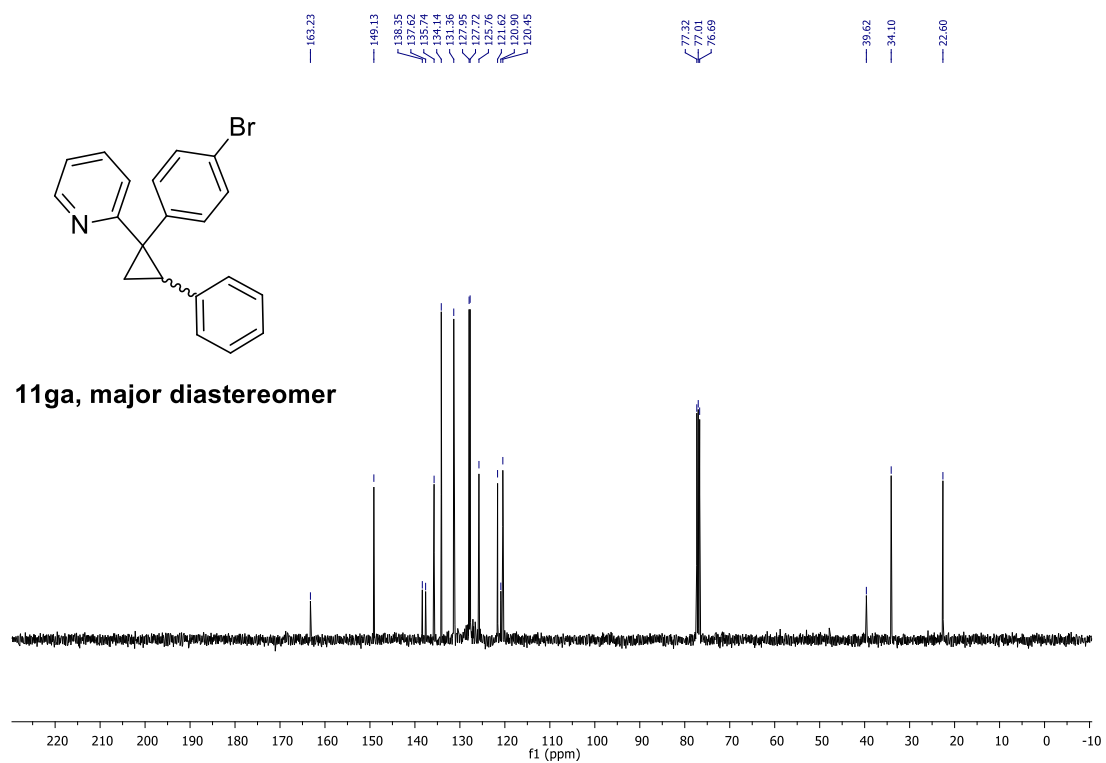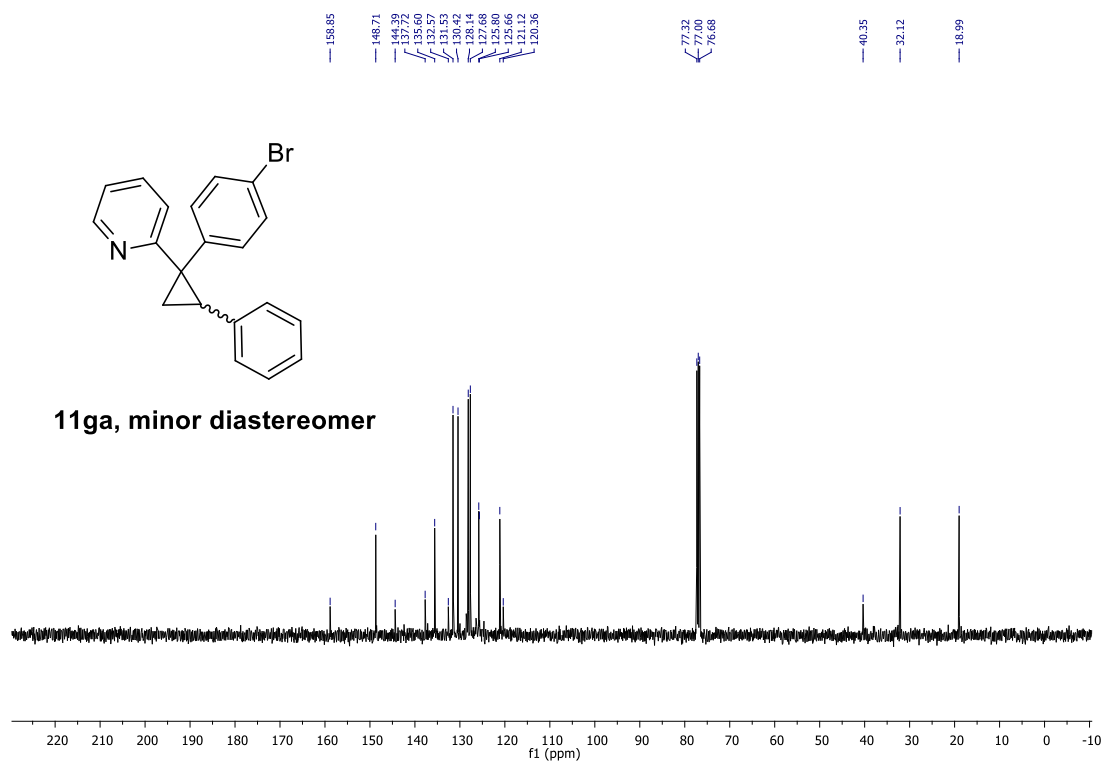

<sup>1</sup>H NMR of **11ha**

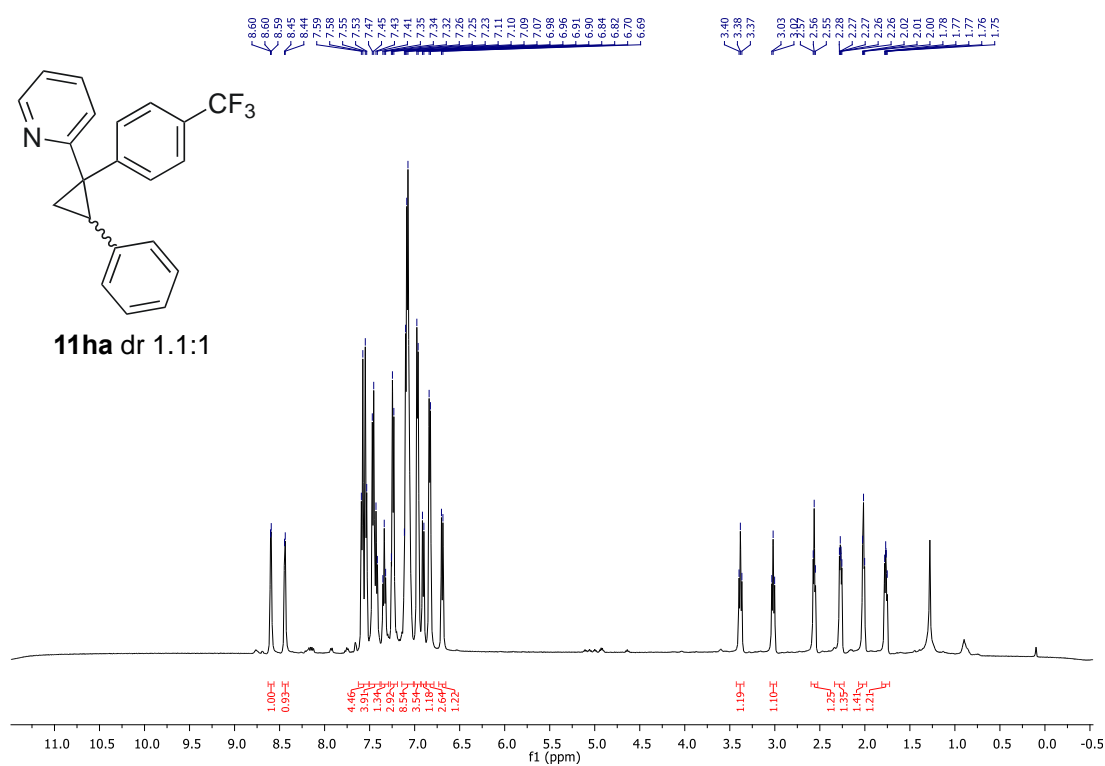

<sup>13</sup>C NMR of **11ha**

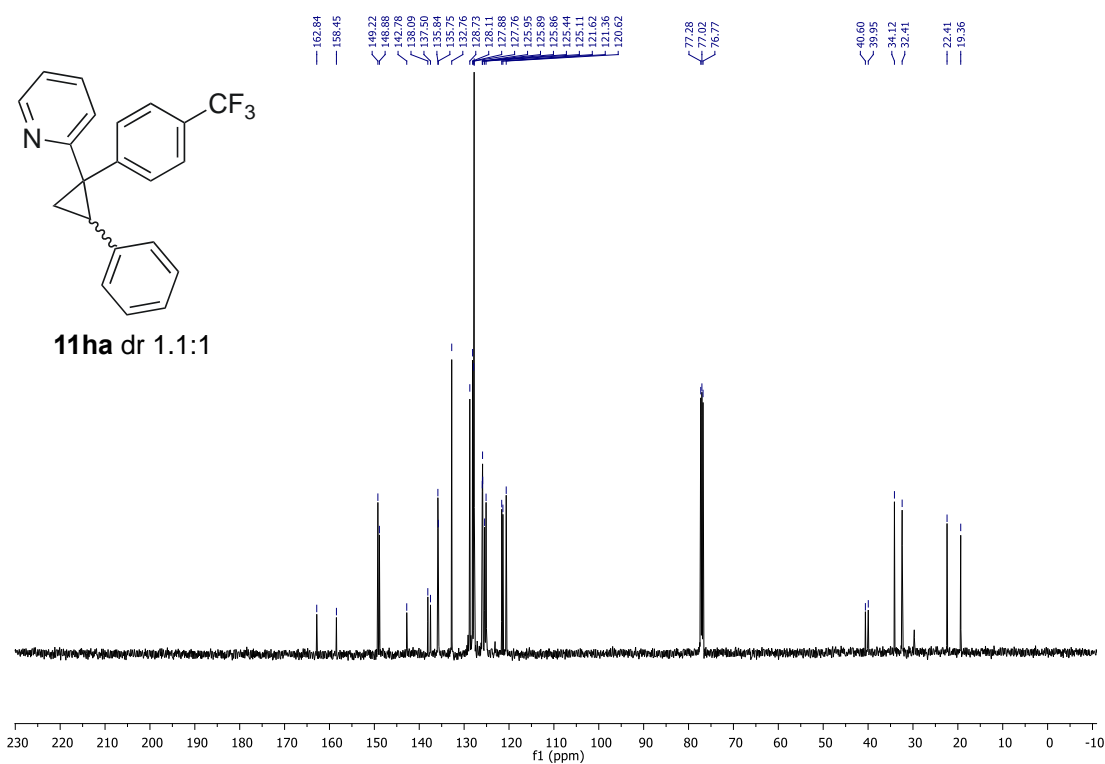

<sup>1</sup>H NMR of **11ia**

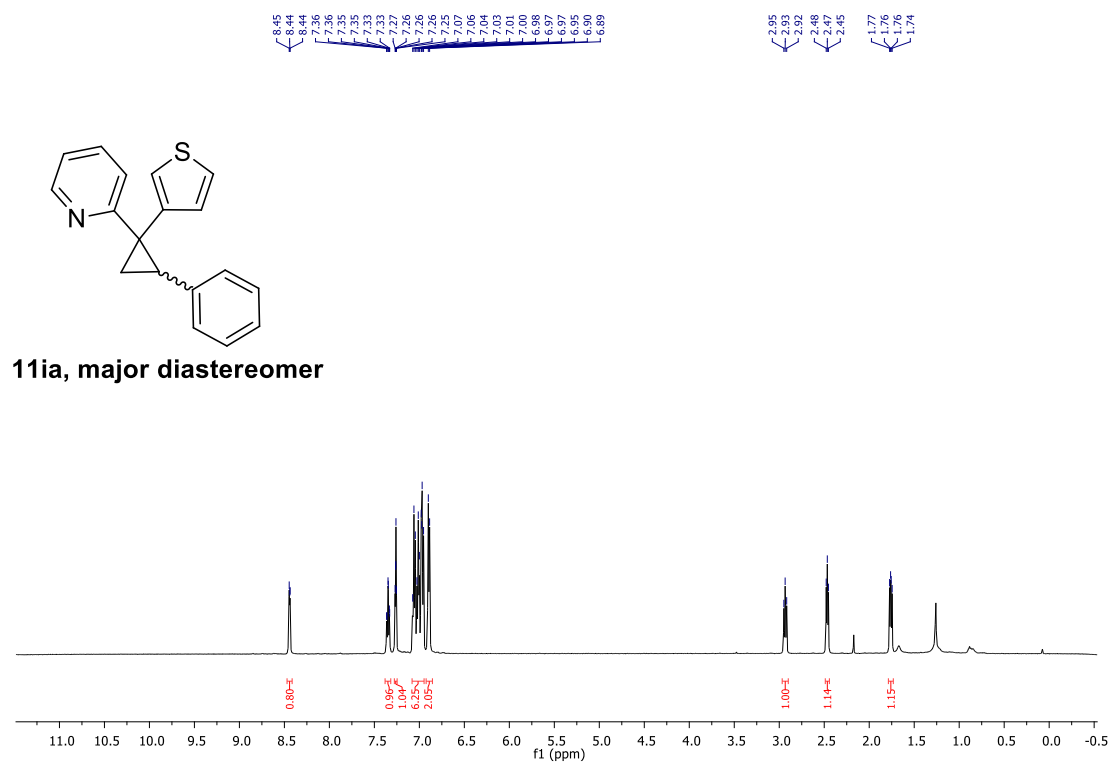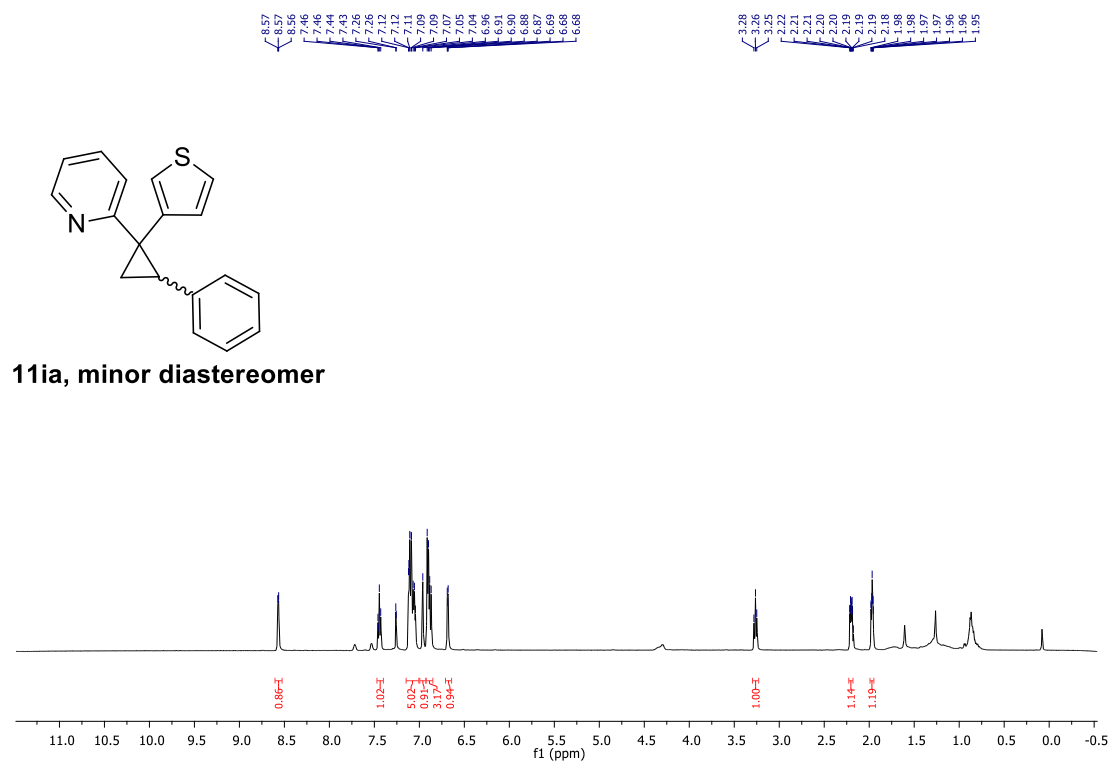

$^{13}\text{C}$  NMR of **11ia**

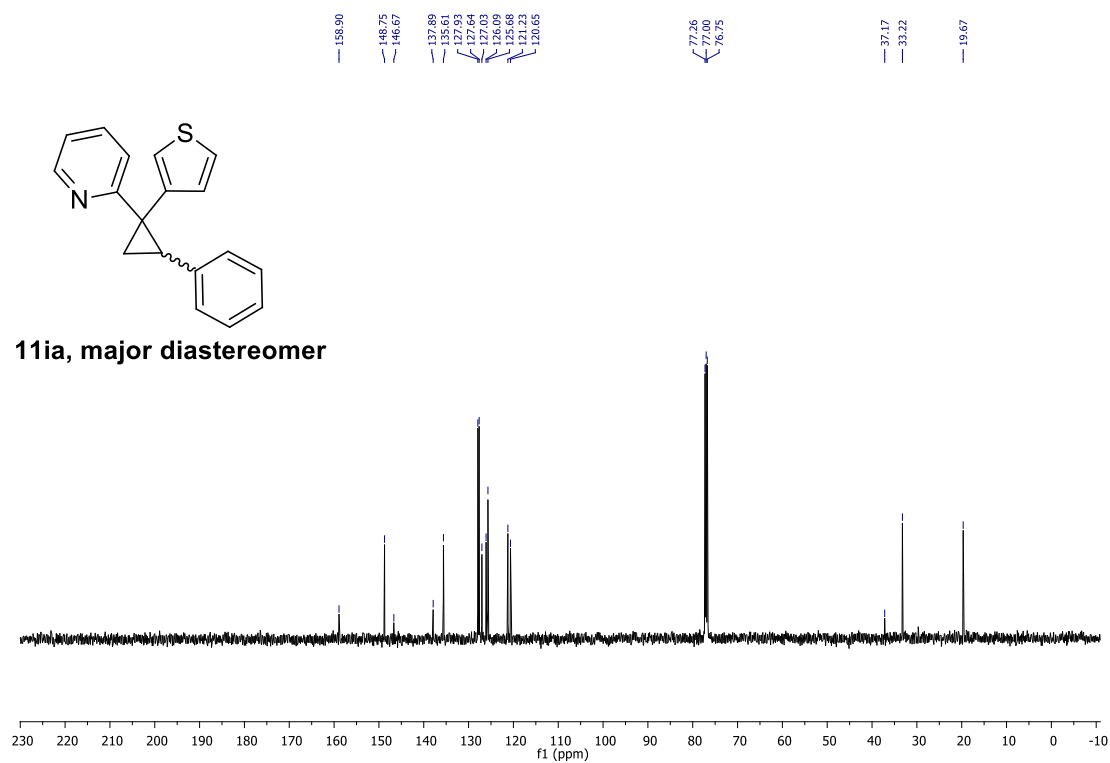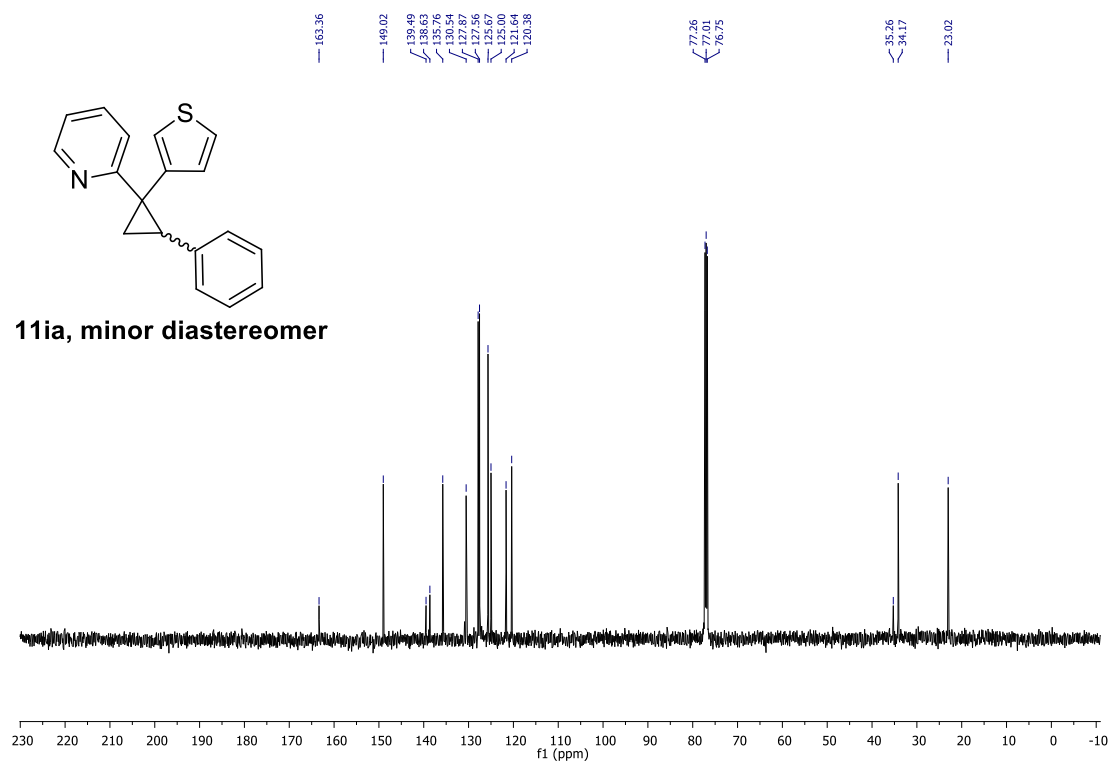

# <sup>1</sup>H NMR of **11na**

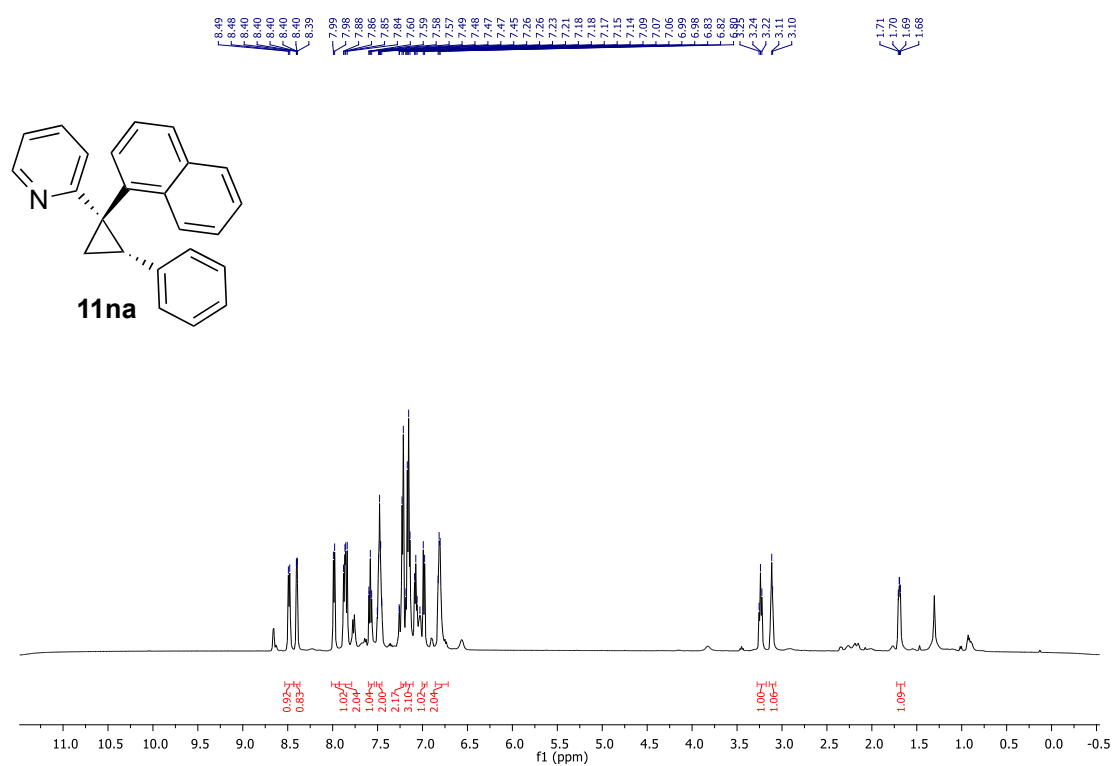

# <sup>13</sup>C NMR of **11na**

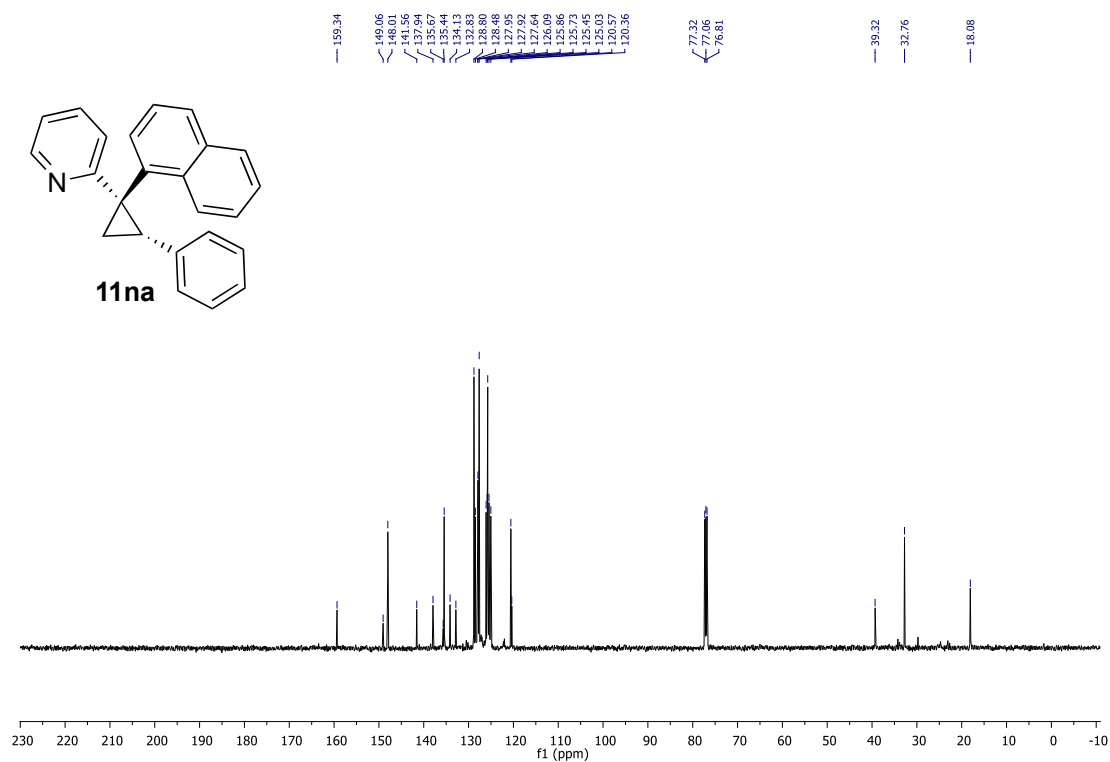

$^1\text{H}$  NMR of **11ma**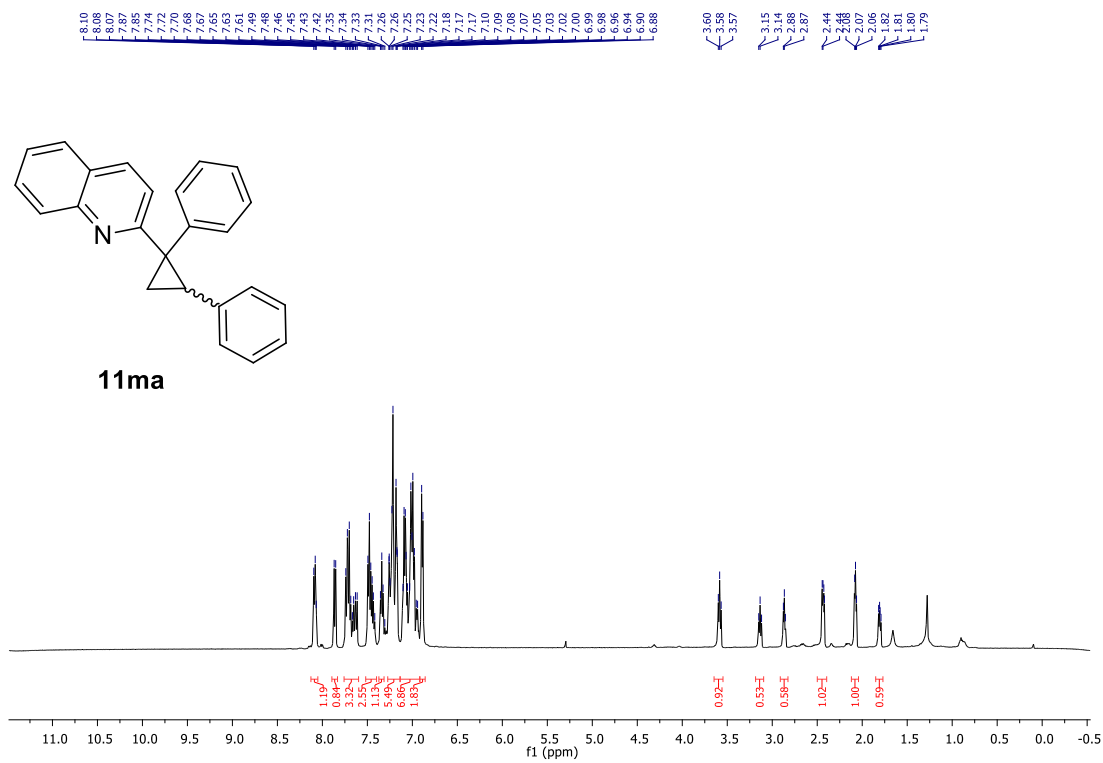 $^{13}\text{C}$  NMR of **11ma**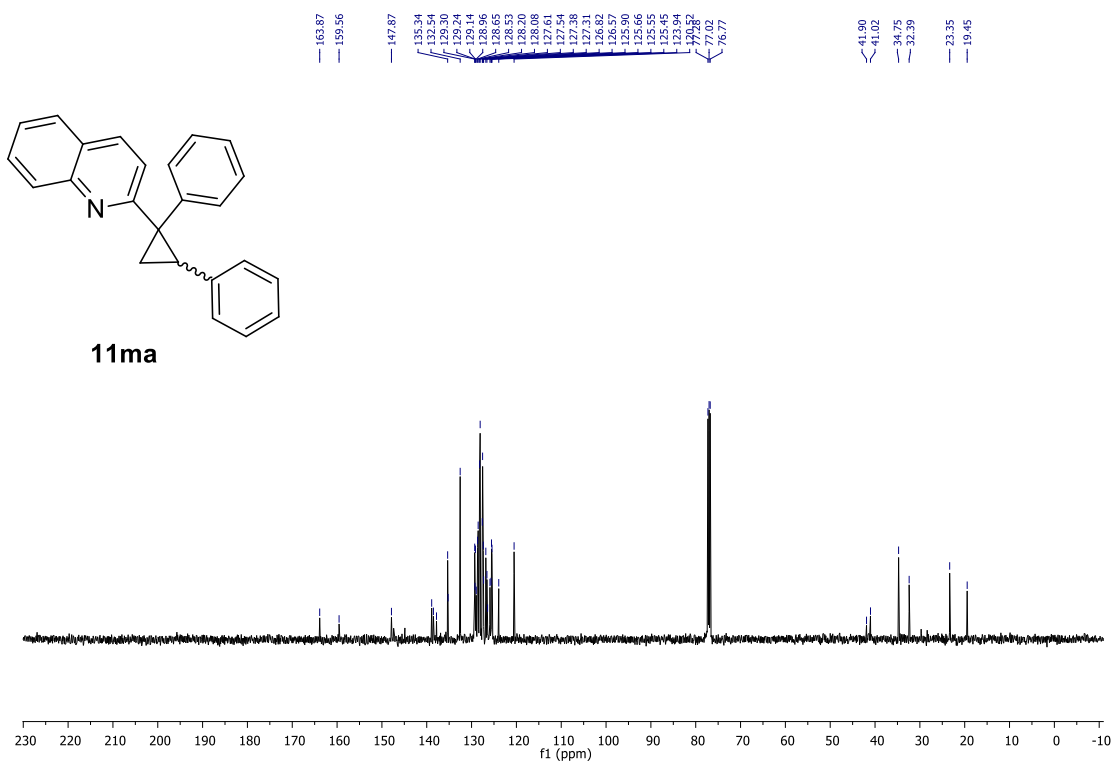

# <sup>1</sup>H NMR of **11oa**

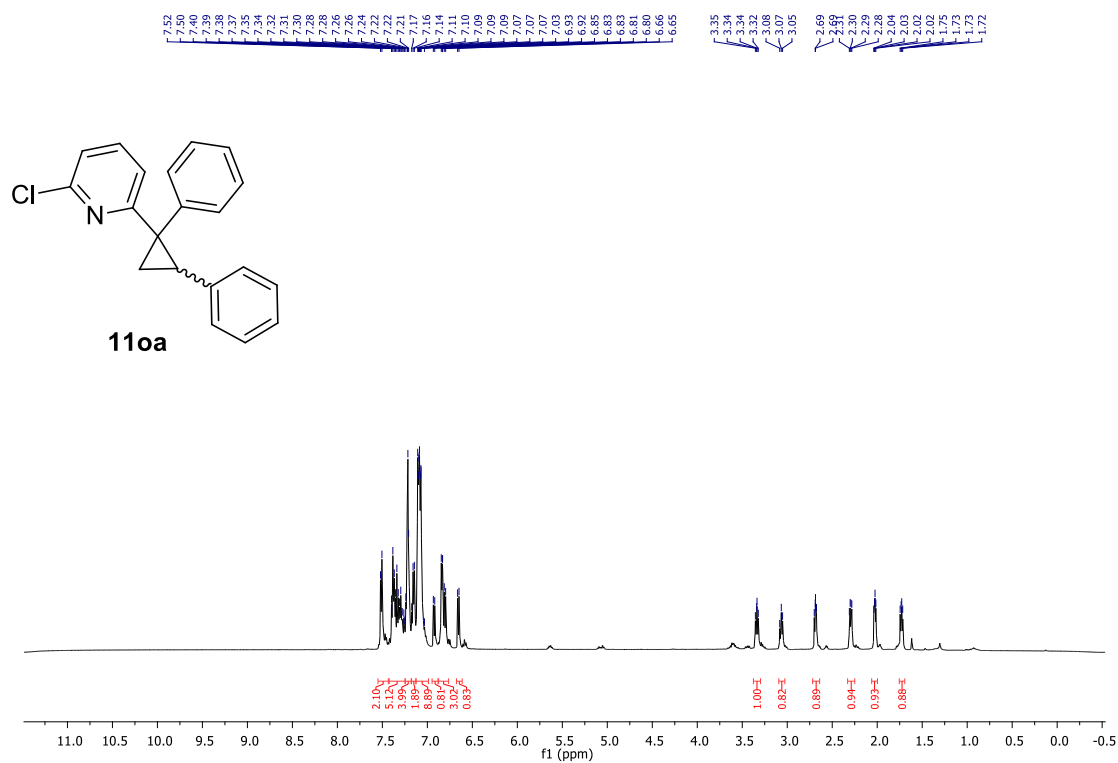

# <sup>13</sup>C NMR of **11oa**

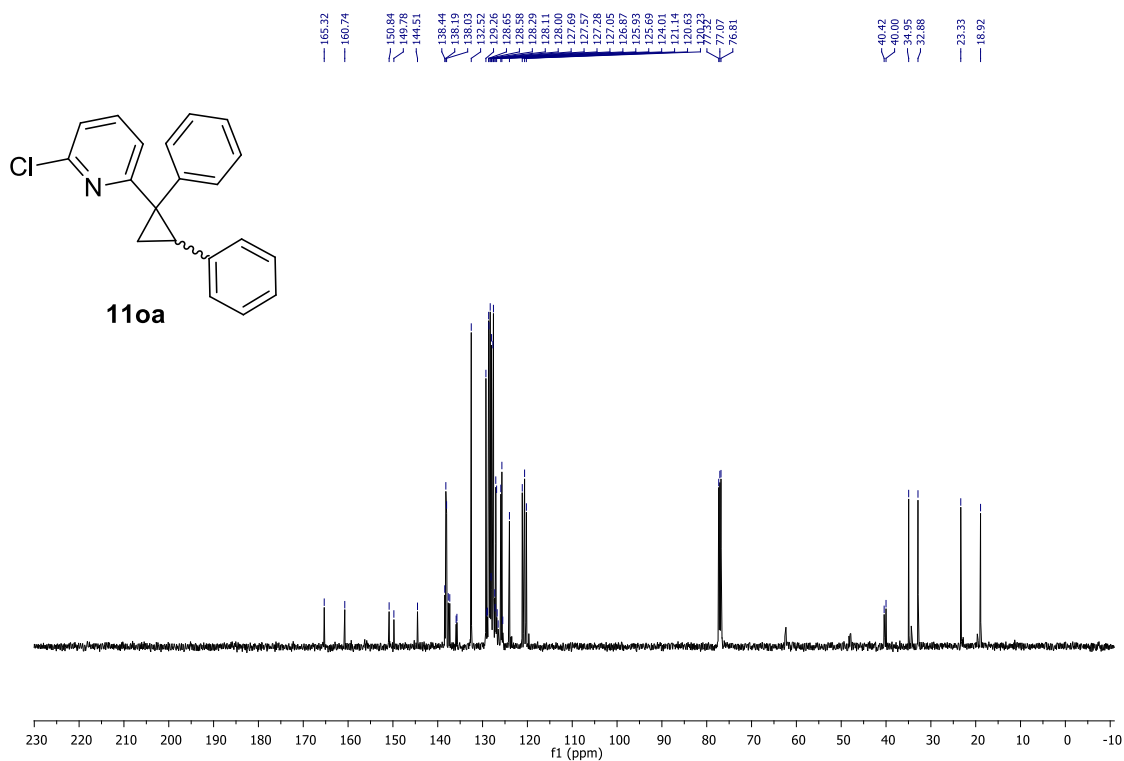

<sup>1</sup>H NMR of **11ab**

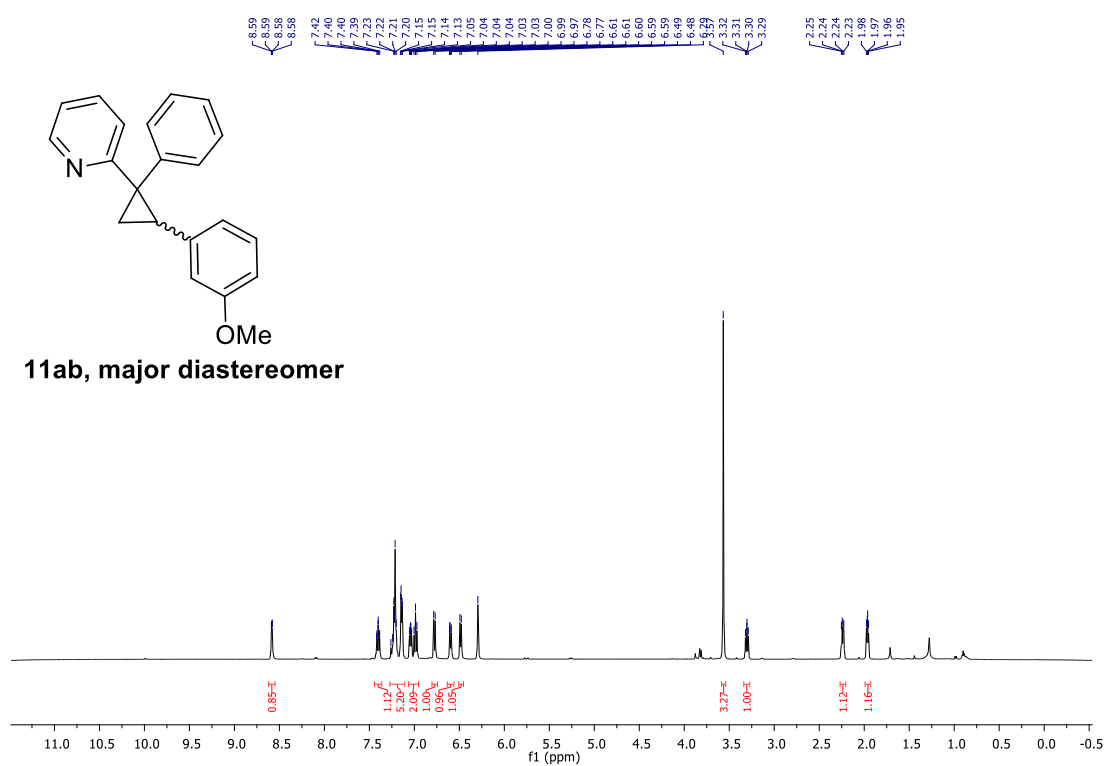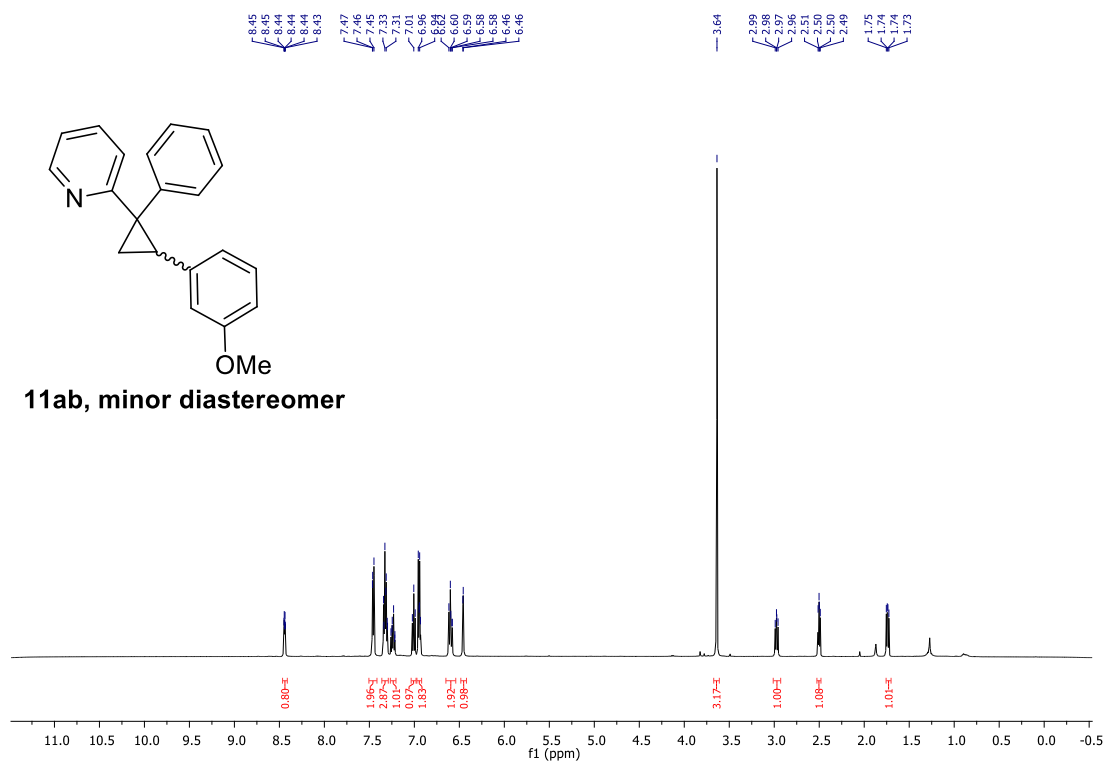

<sup>13</sup>C NMR of **11ab**

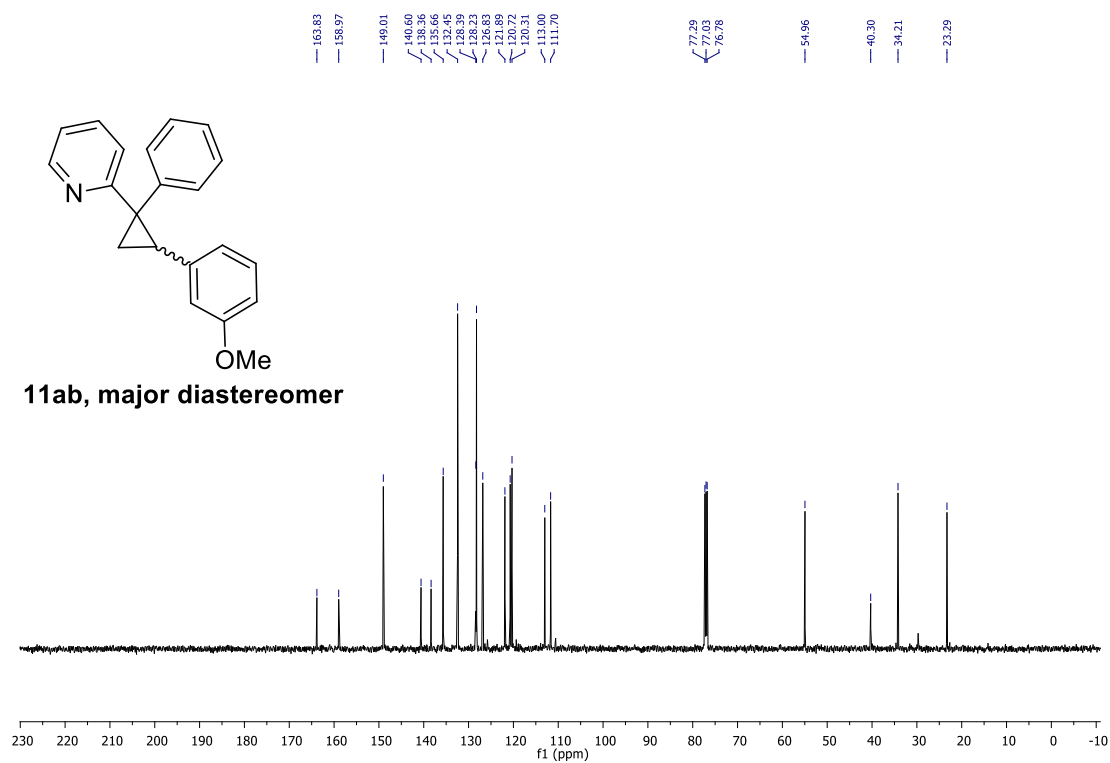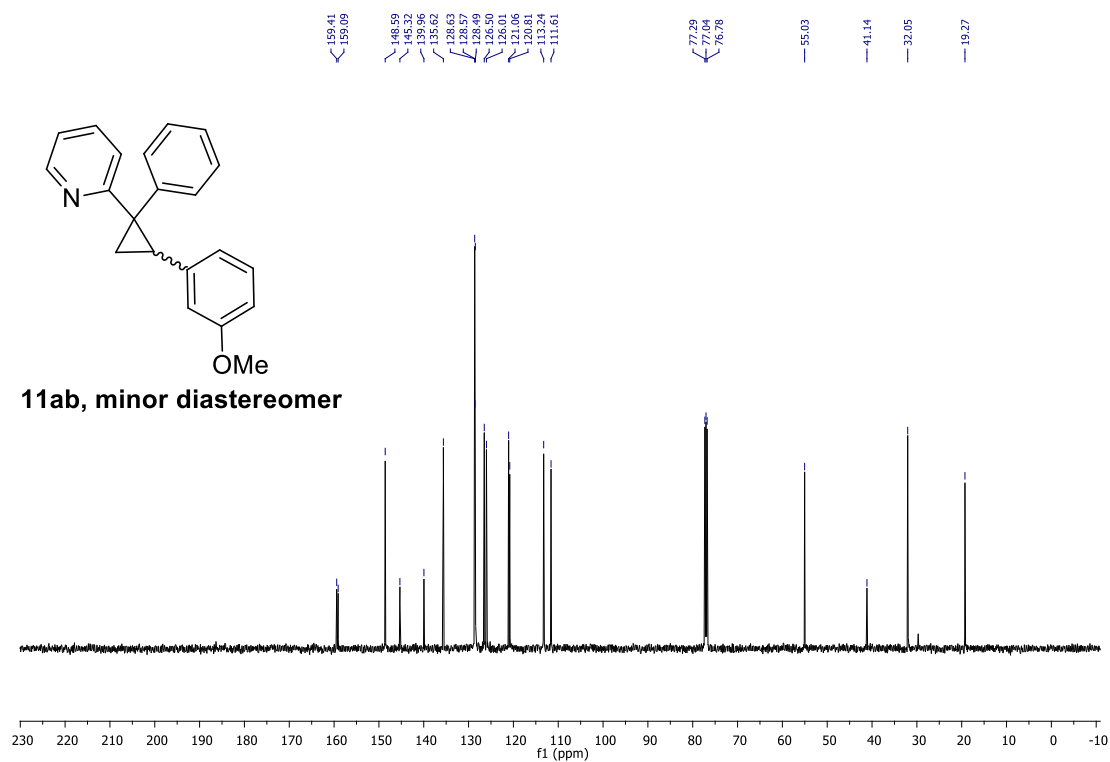

# <sup>1</sup>H NMR of **11ac**

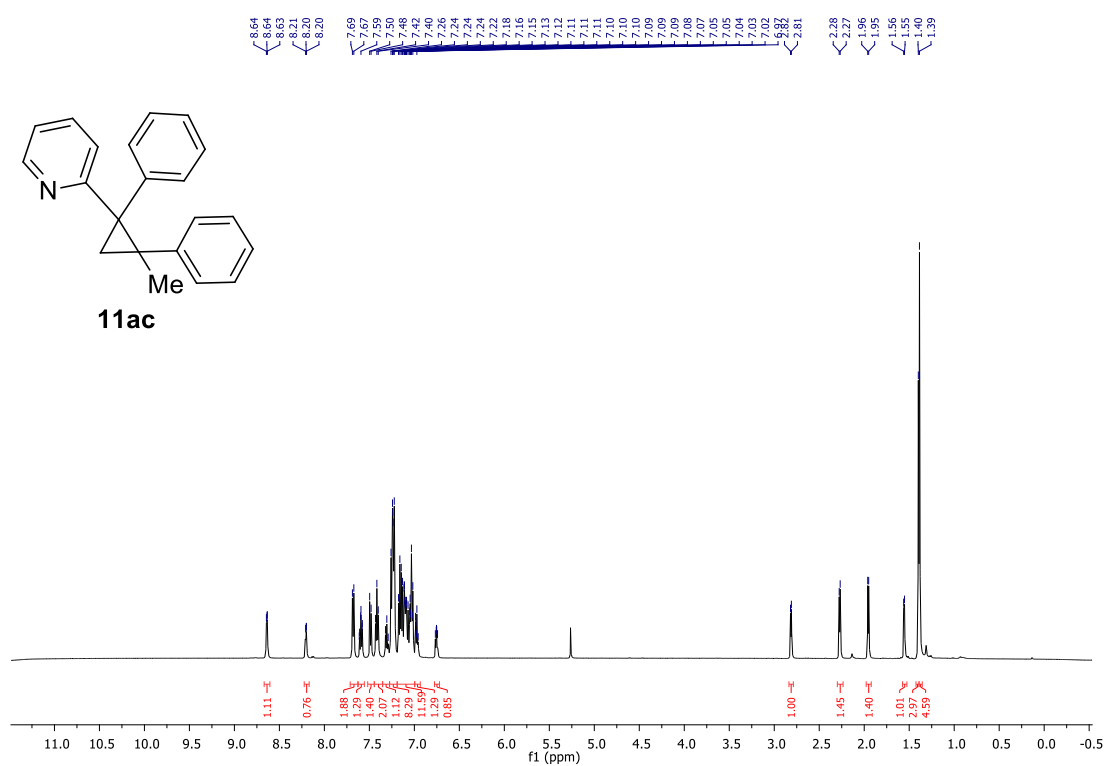

# <sup>13</sup>C NMR of **11ac**

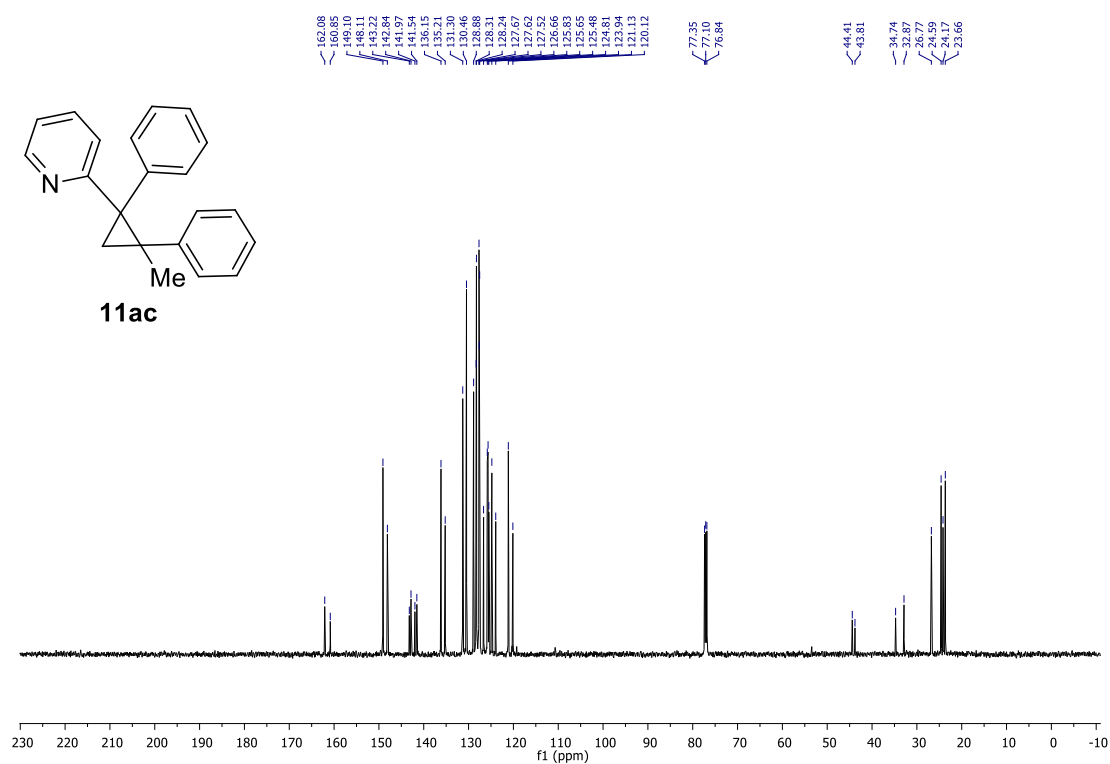

# <sup>1</sup>H NMR of **11ad**

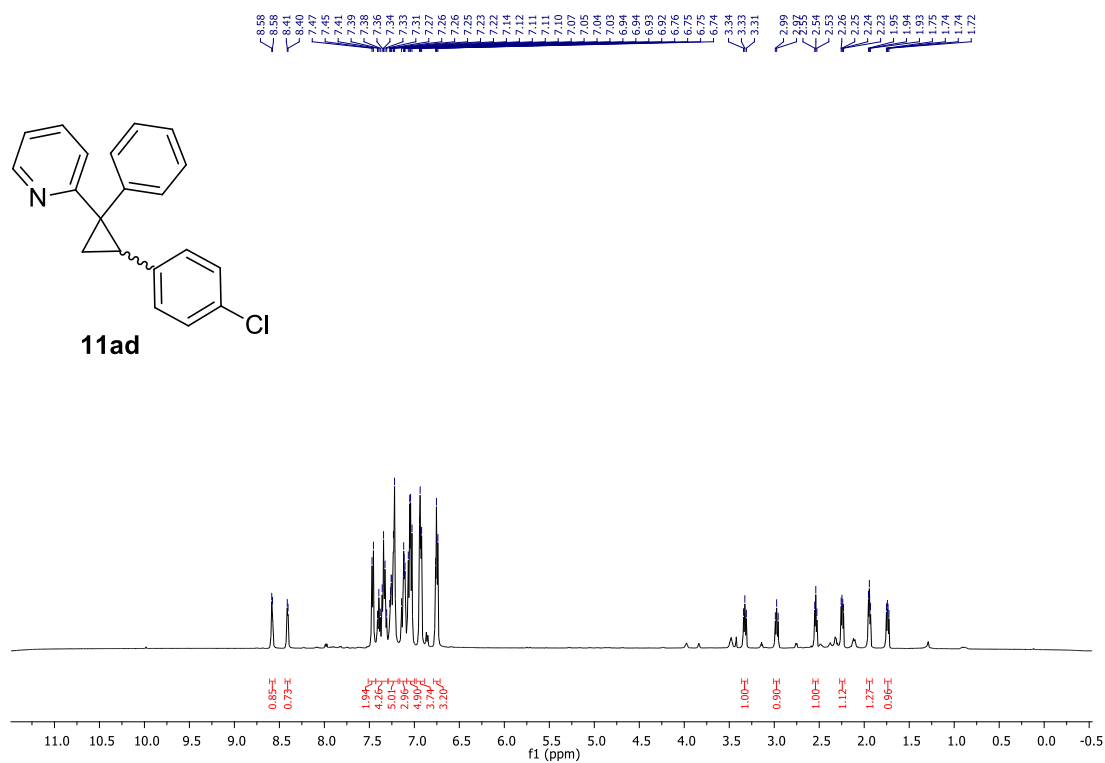

# <sup>13</sup>C NMR of **11ad**

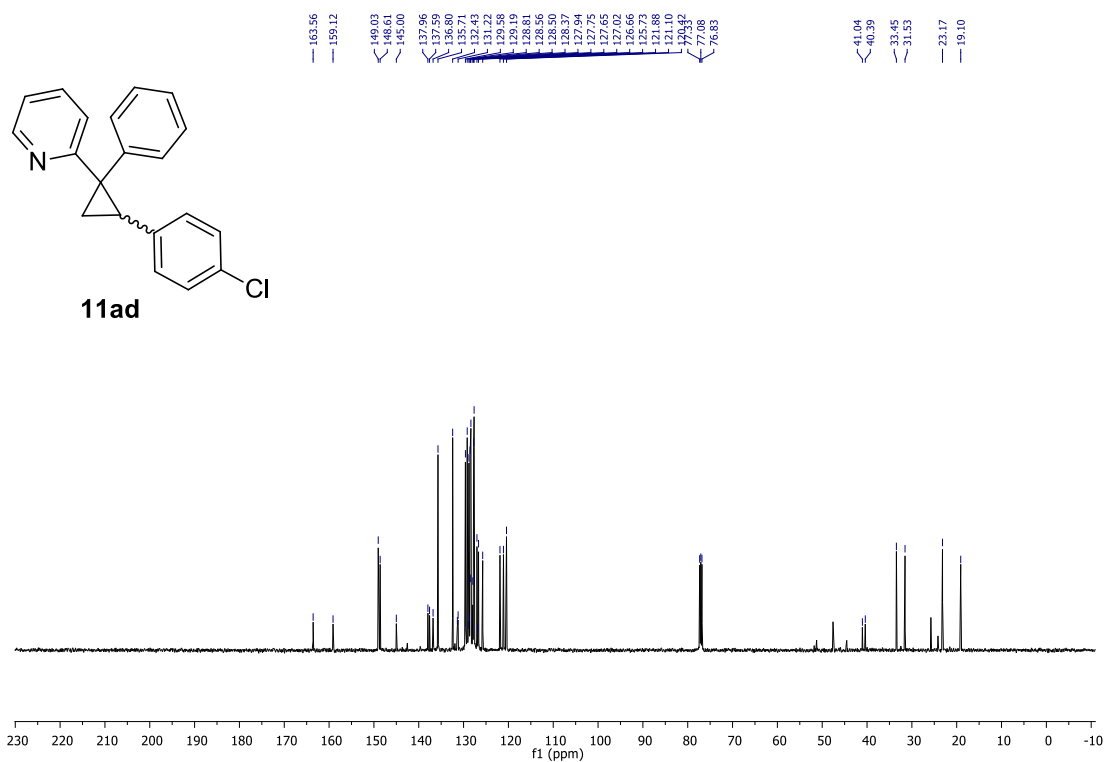

**11ae**

Chemical structure of **11ae** is shown. The <sup>13</sup>C NMR spectrum (CDCl<sub>3</sub>) displays peaks at the following chemical shifts (ppm): 164.07, 159.75, 146.07, 145.38, 145.27, 138.82, 135.66, 135.31, 131.78, 129.44, 128.55, 128.03, 127.57, 126.91, 126.65, 125.92, 125.66, 125.17, 125.12, 124.68, 121.78, 120.71, 120.26, 77.07, 76.81, 39.94, 39.41, 31.74, 30.03, 21.08, 20.76, 20.33, 18.63.

<sup>1</sup>H NMR of **11af**

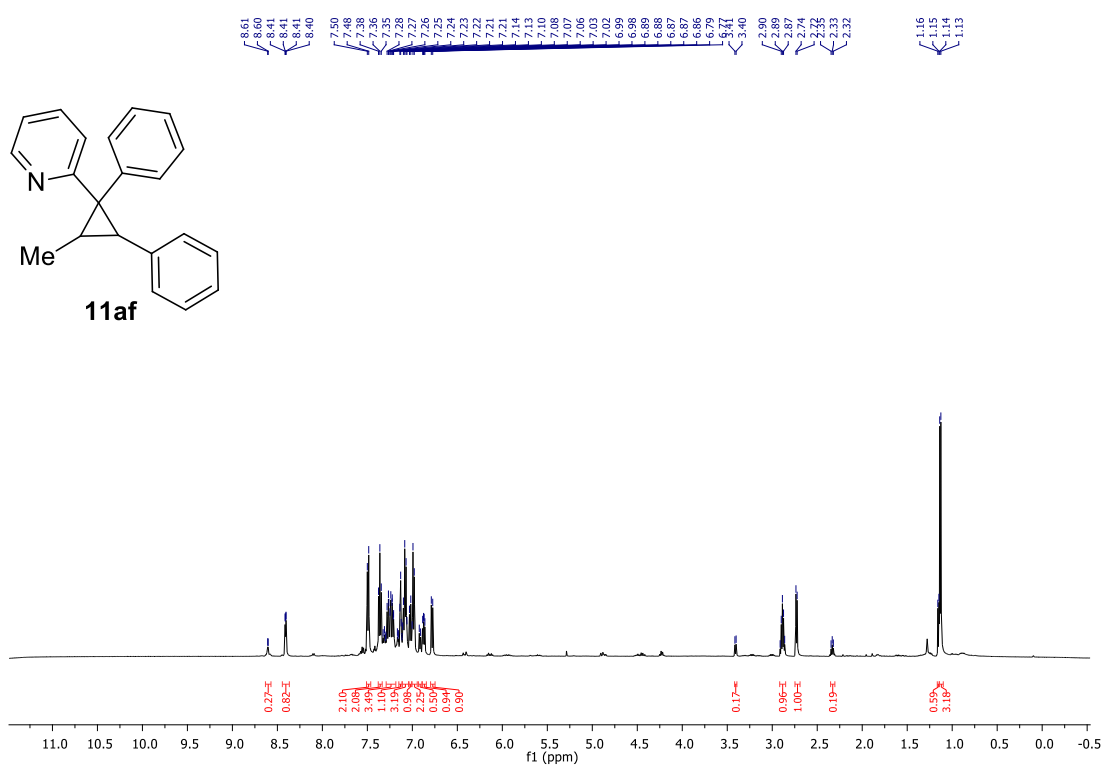

<sup>13</sup>C NMR of **11af**

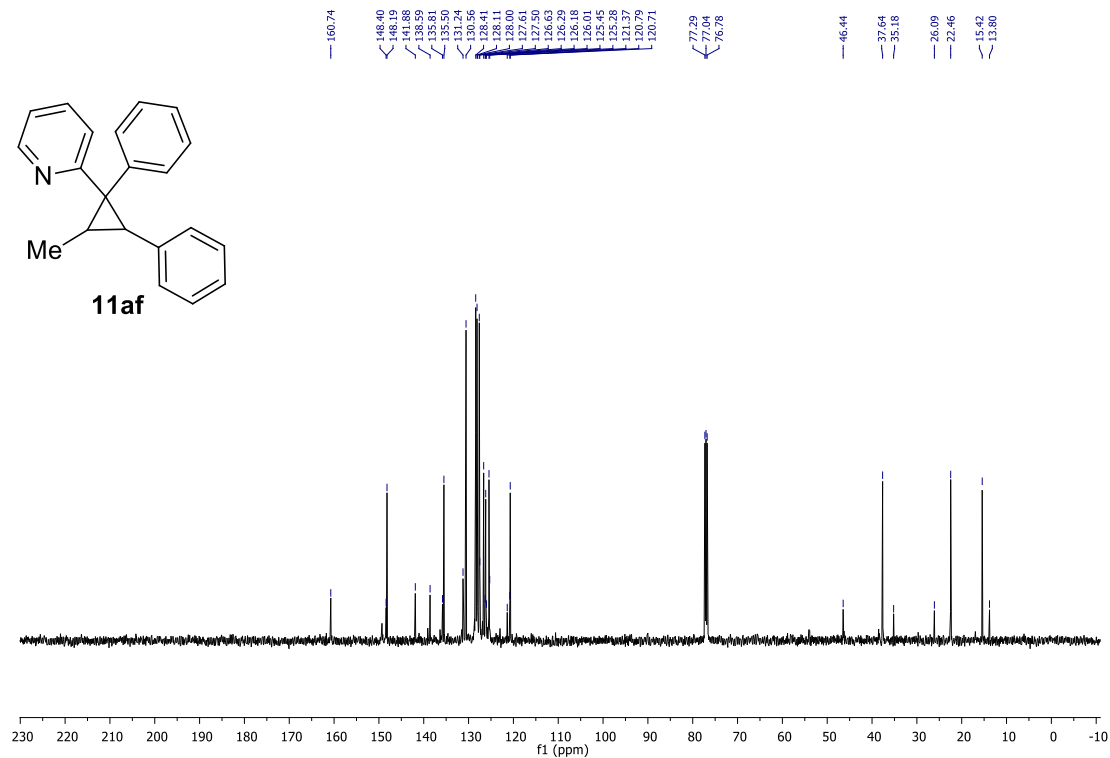

<sup>1</sup>H NMR of **11ag**

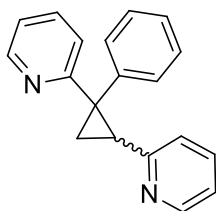

**11ag, major diastereomer**

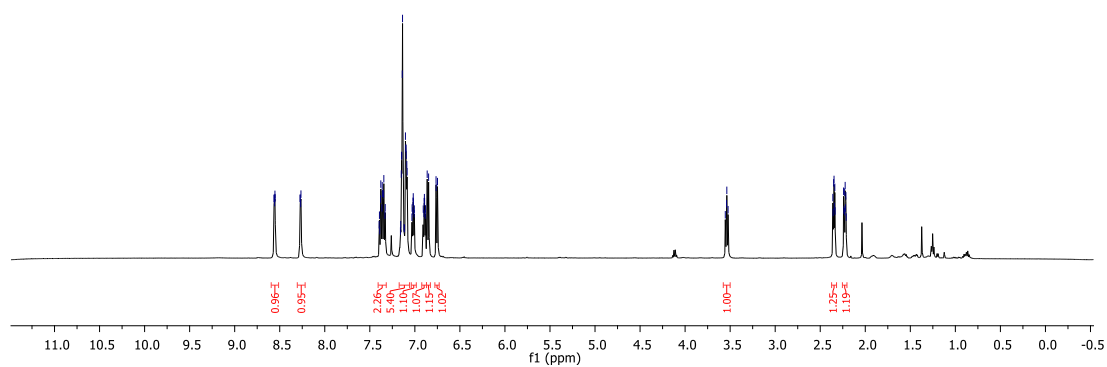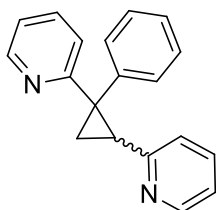

**11ag, minor diastereomer**

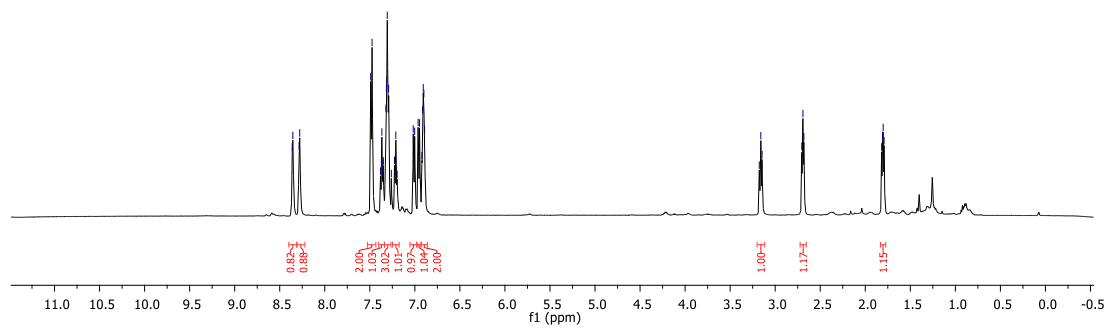

<sup>13</sup>C NMR of **11ag**

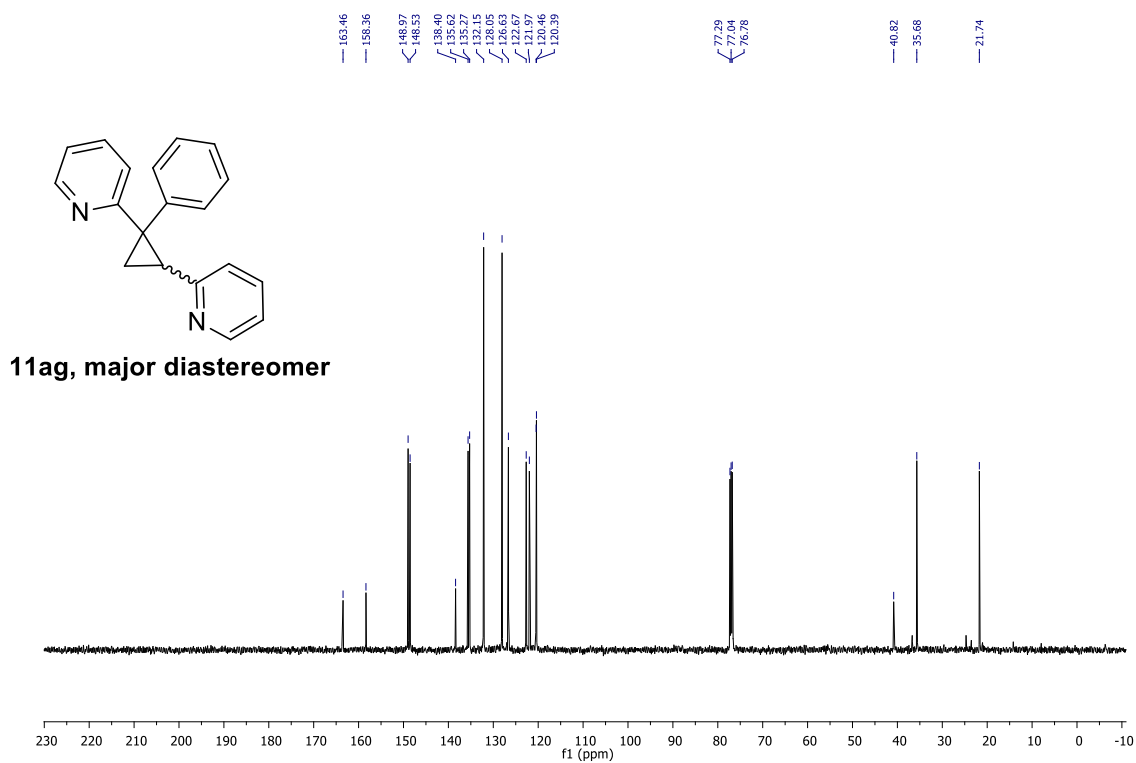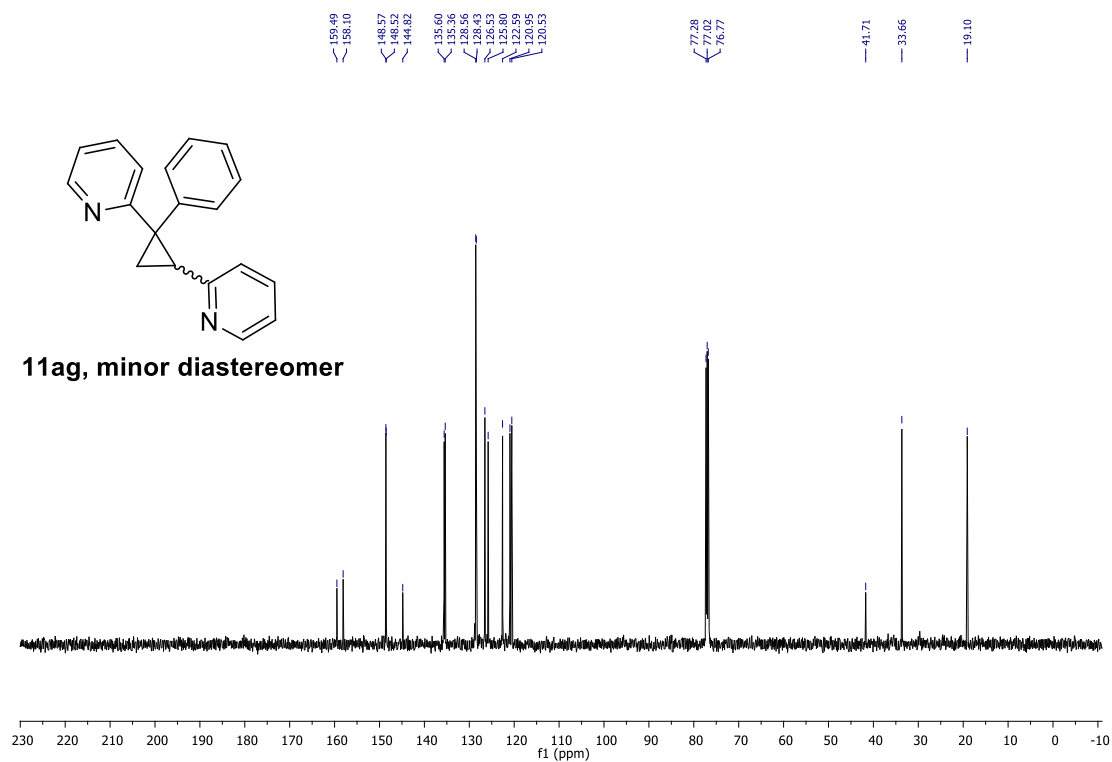

<sup>1</sup>H NMR of **11ah**

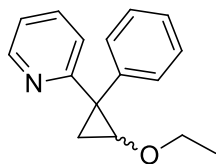

**11ah, major diastereomer**

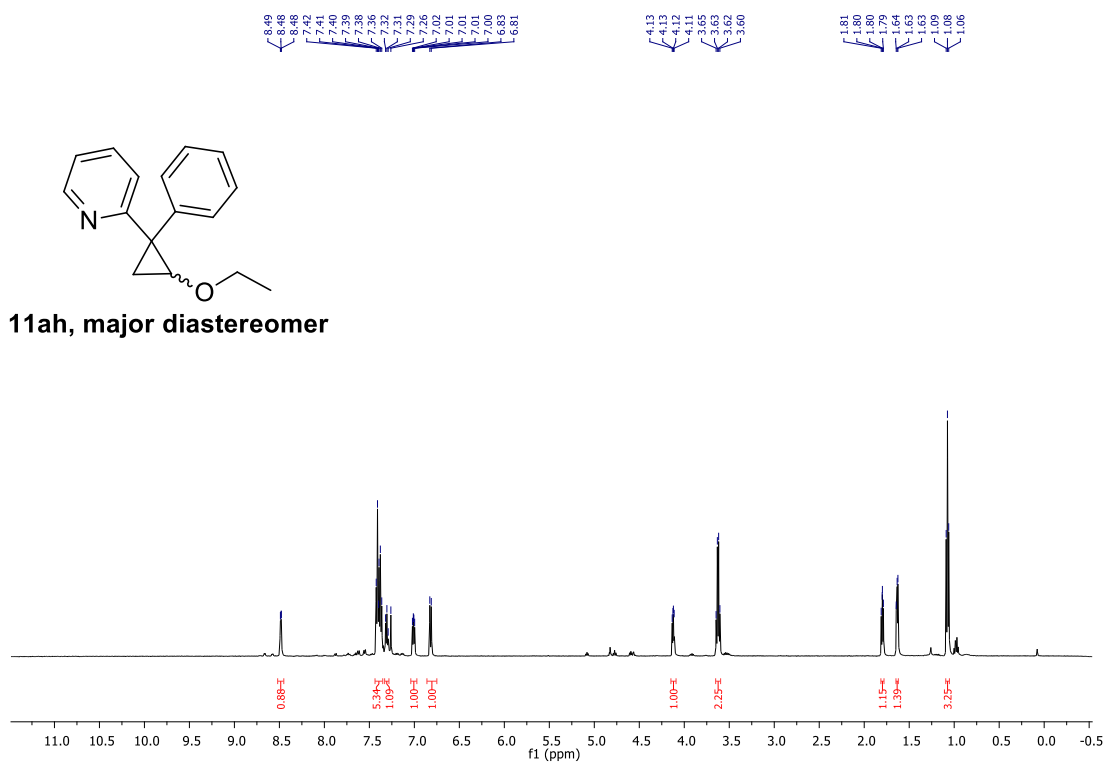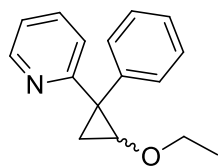

**11ah, minor diastereomer**

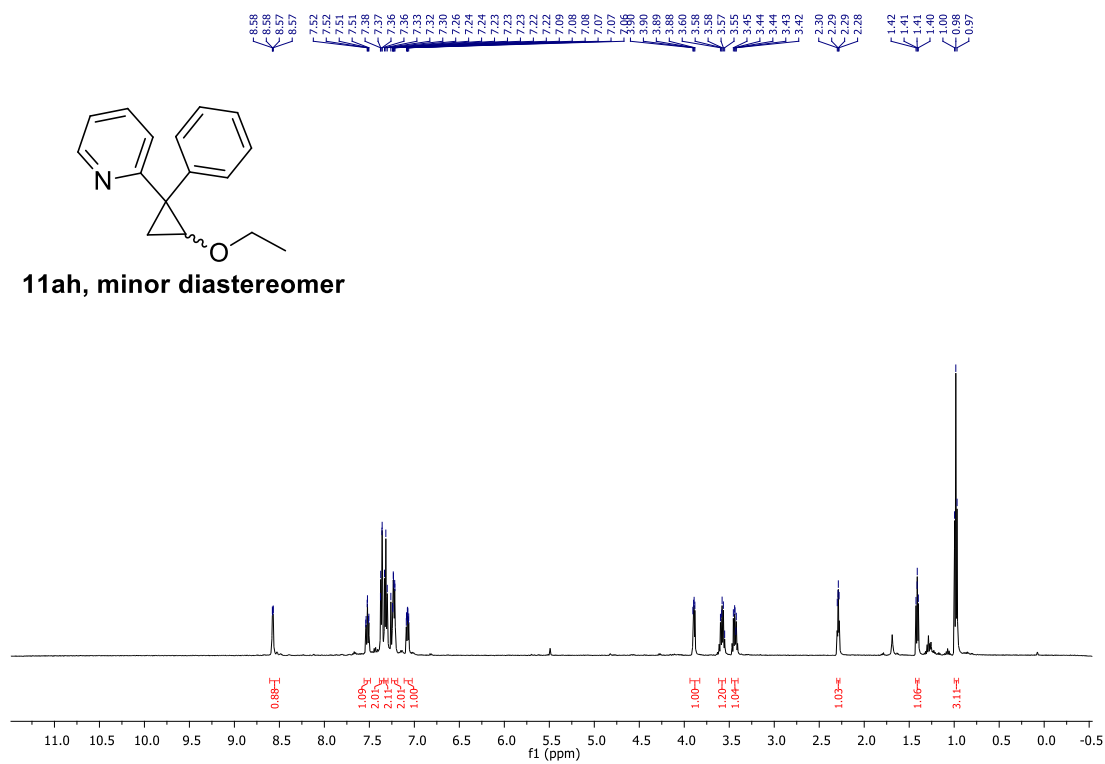

<sup>13</sup>C NMR of **11ah**

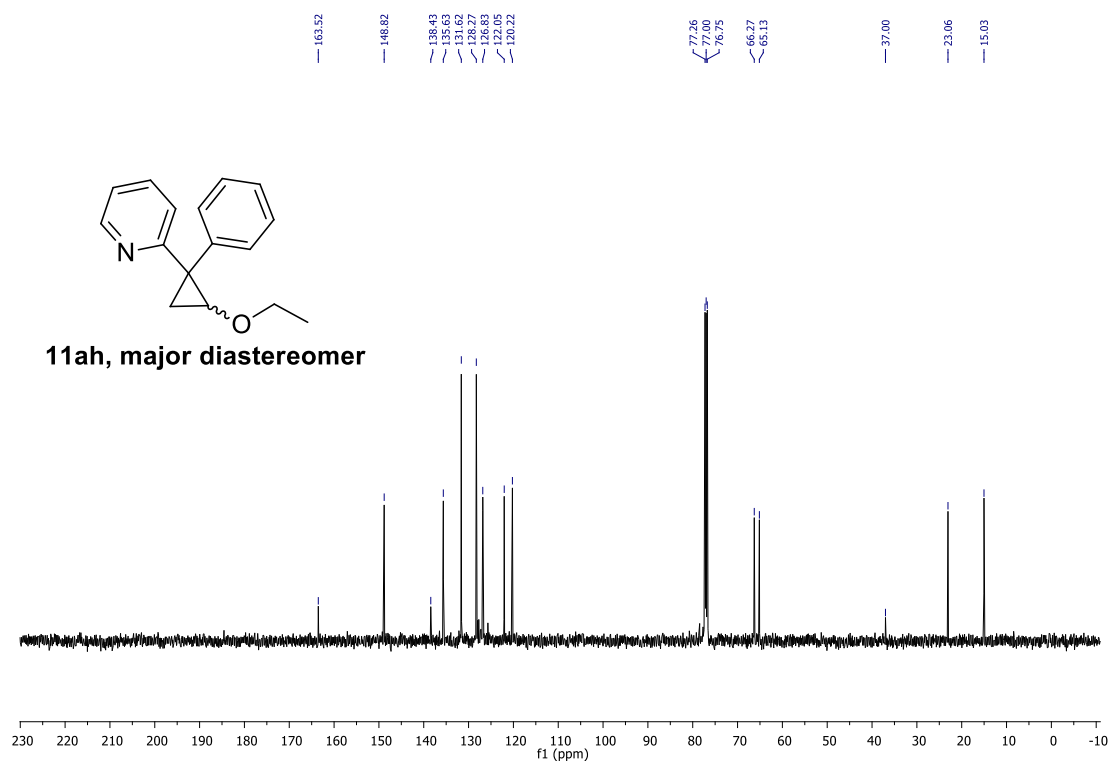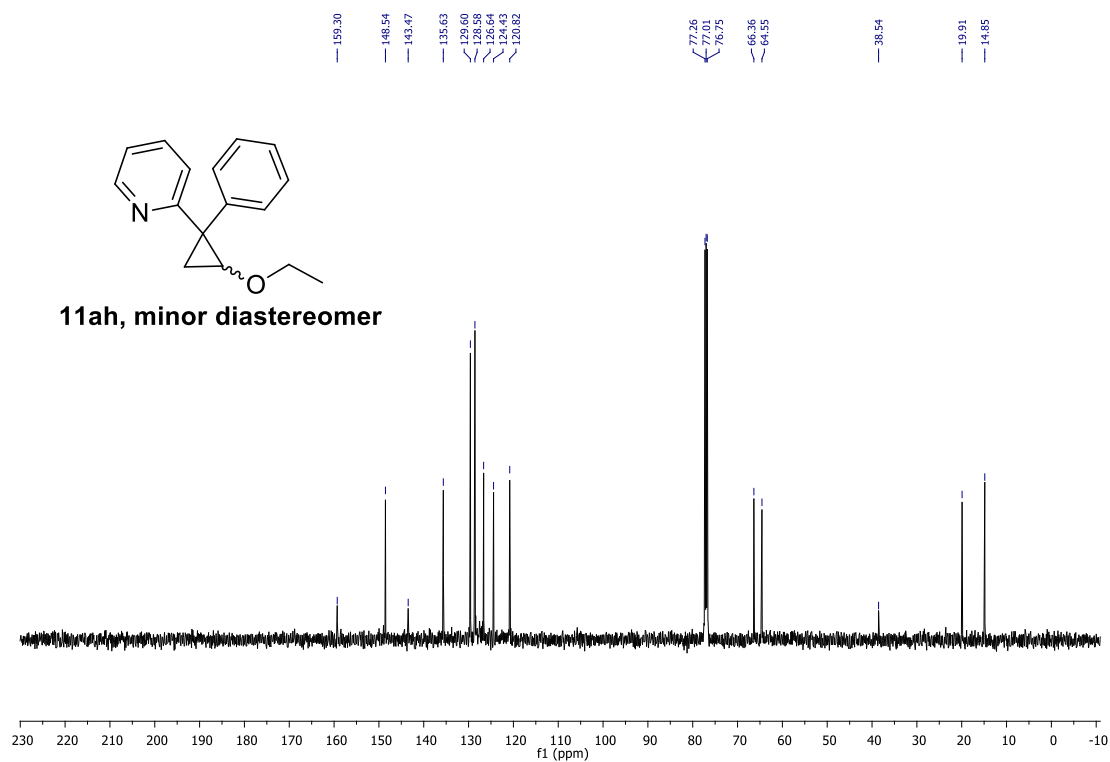

<sup>1</sup>H NMR of **11ai**

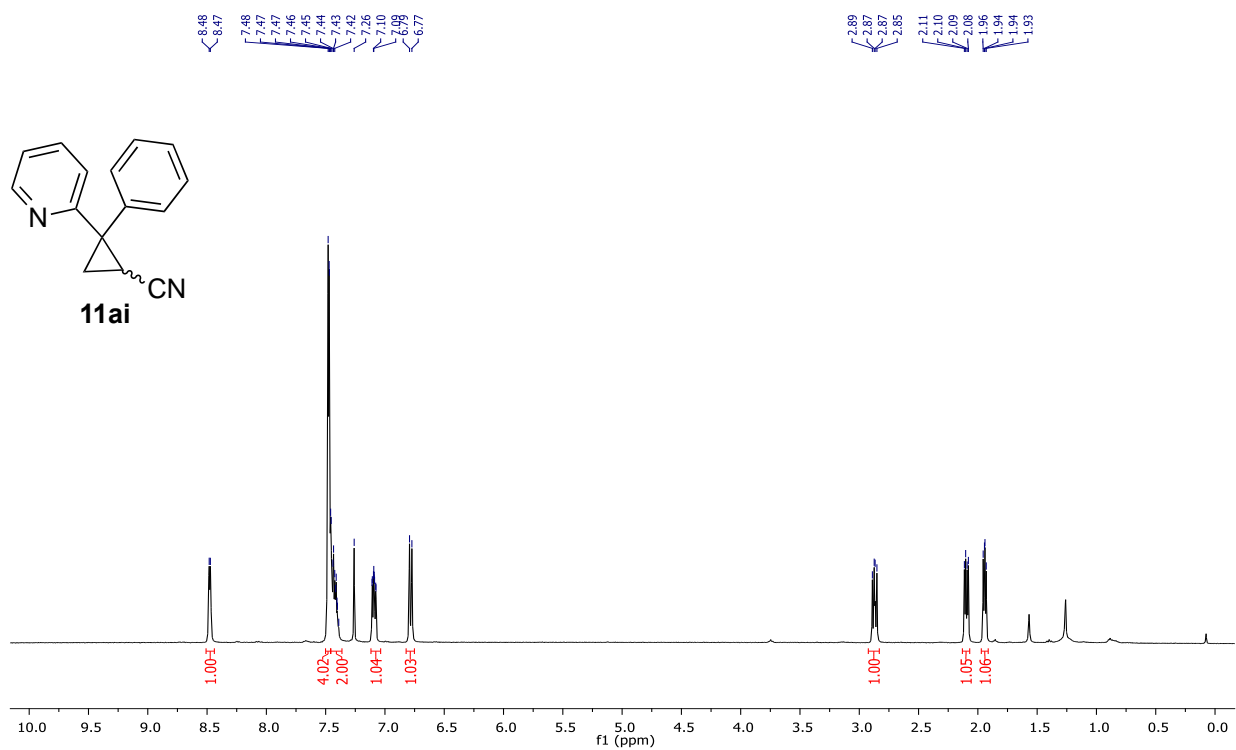

<sup>13</sup>C NMR of **11ai**

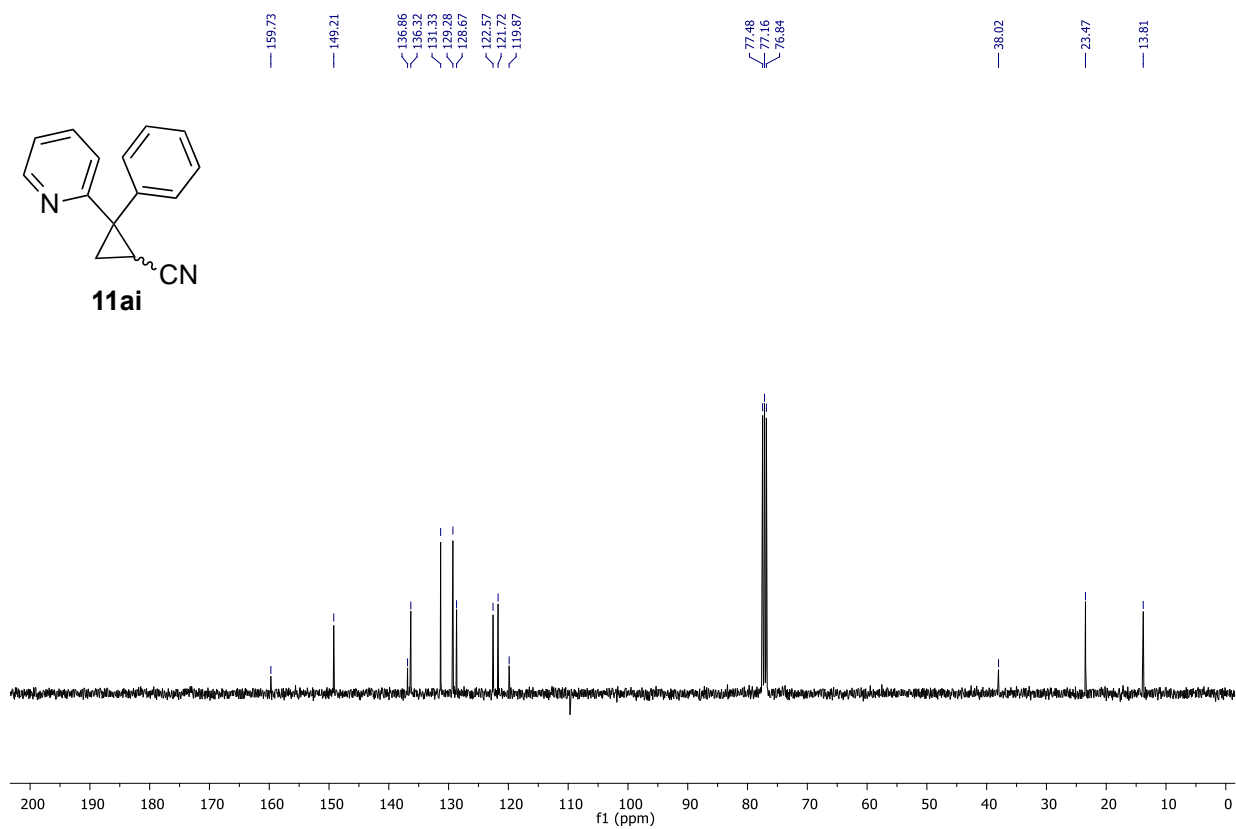

# <sup>1</sup>H NMR of **11aj**

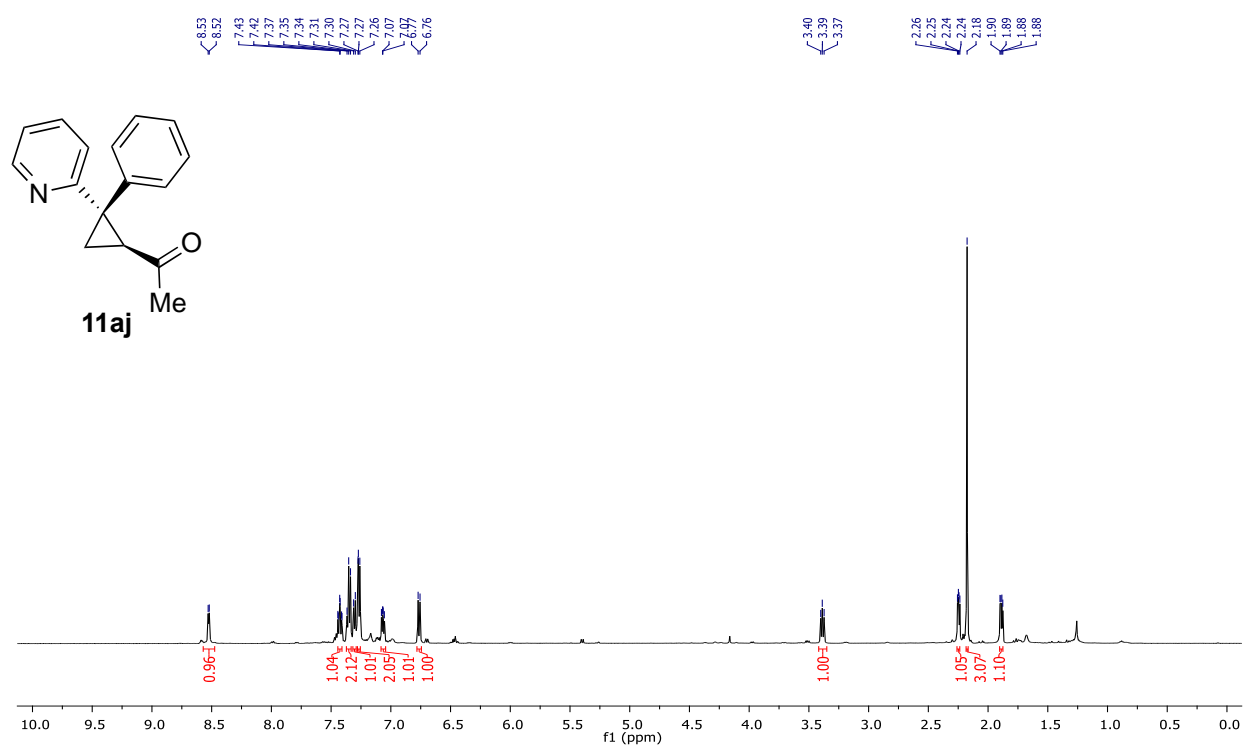

# <sup>13</sup>C NMR of **11aj**

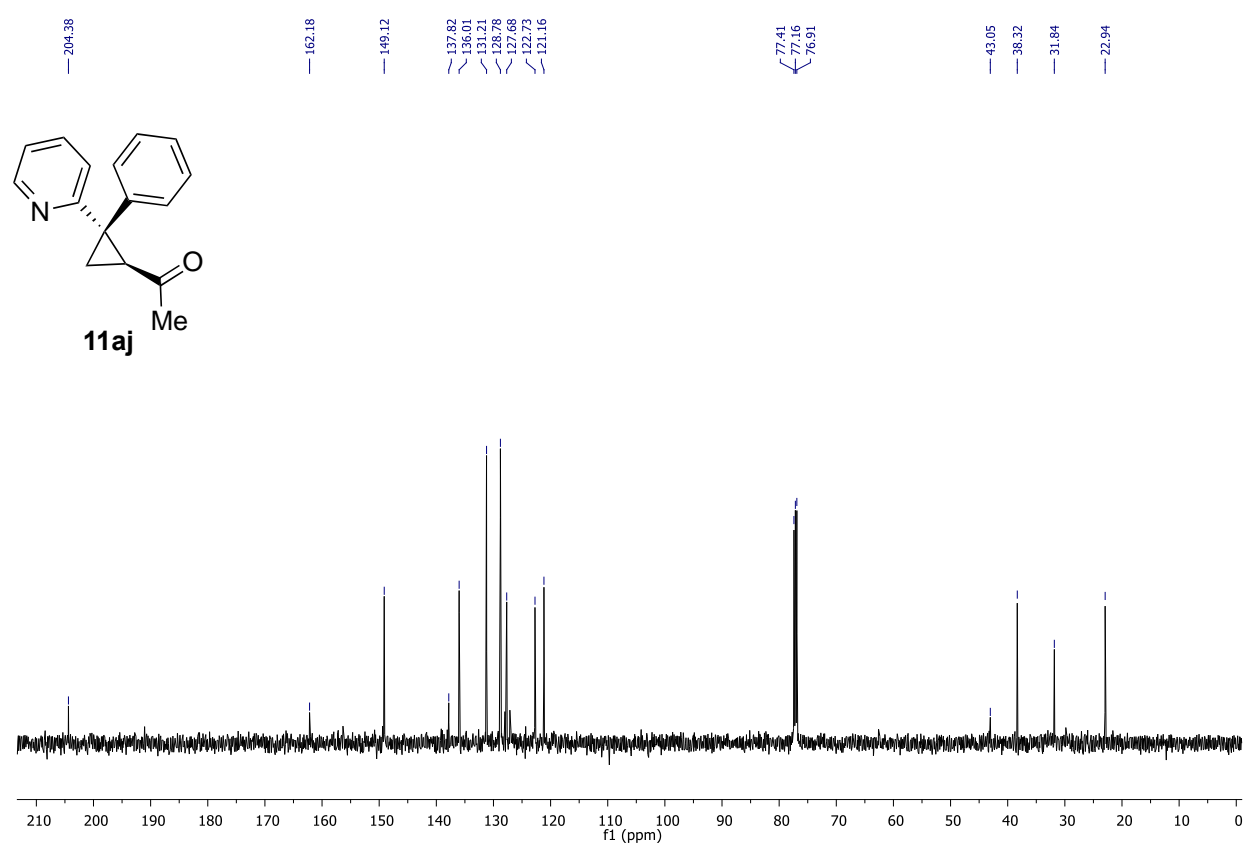

# <sup>1</sup>H NMR of **11ak**

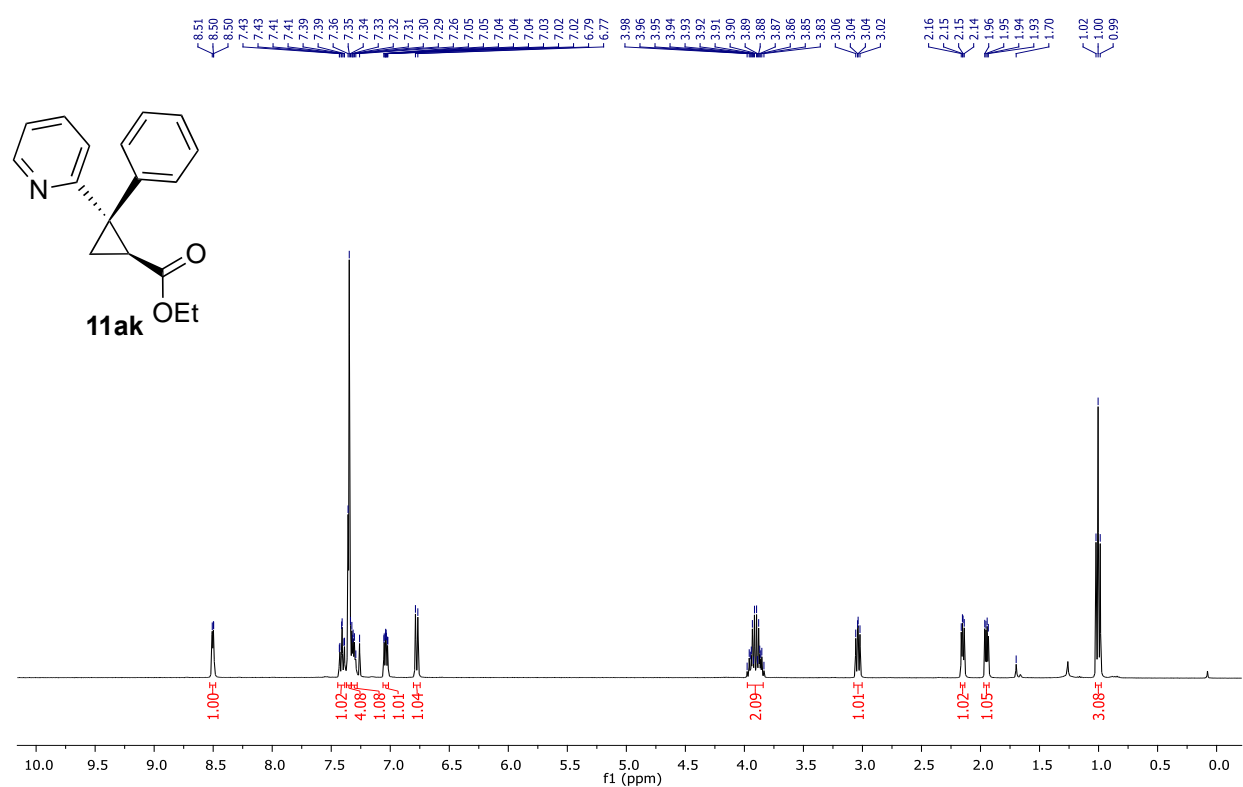

# <sup>13</sup>C NMR of **11ak**

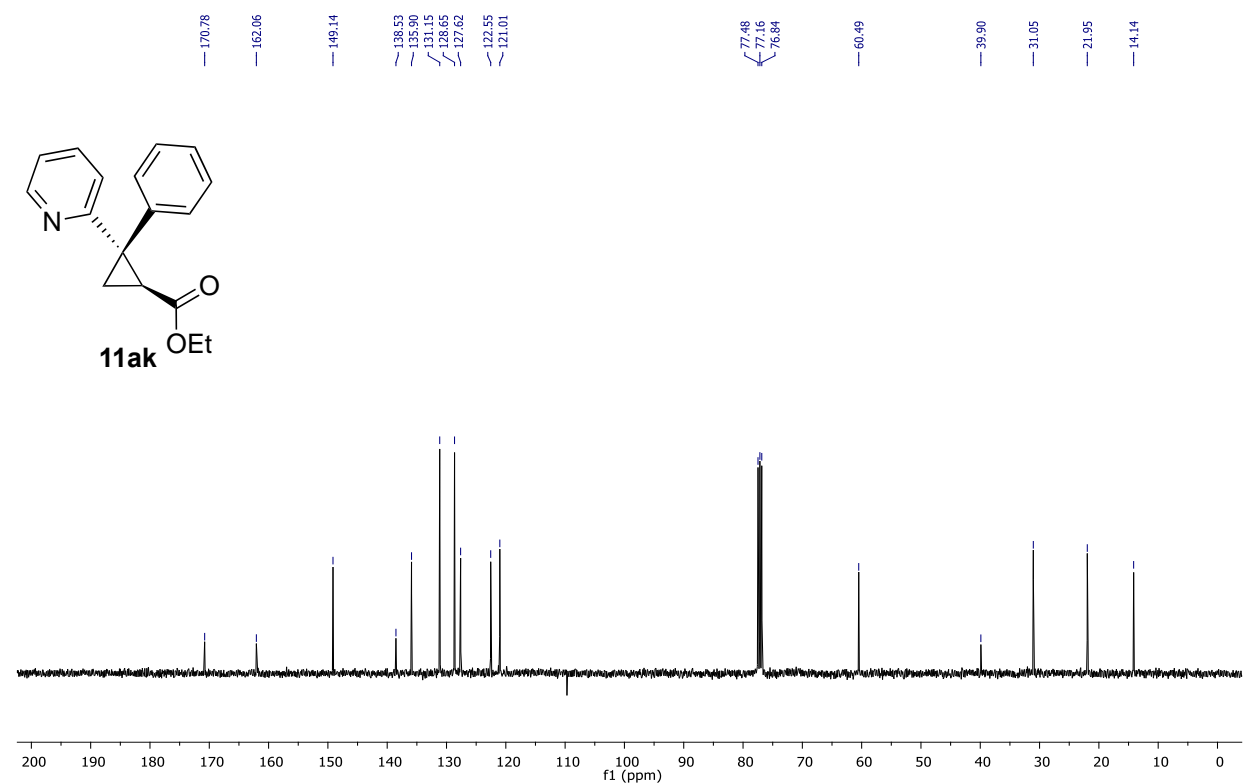

# <sup>1</sup>H NMR of **11al**

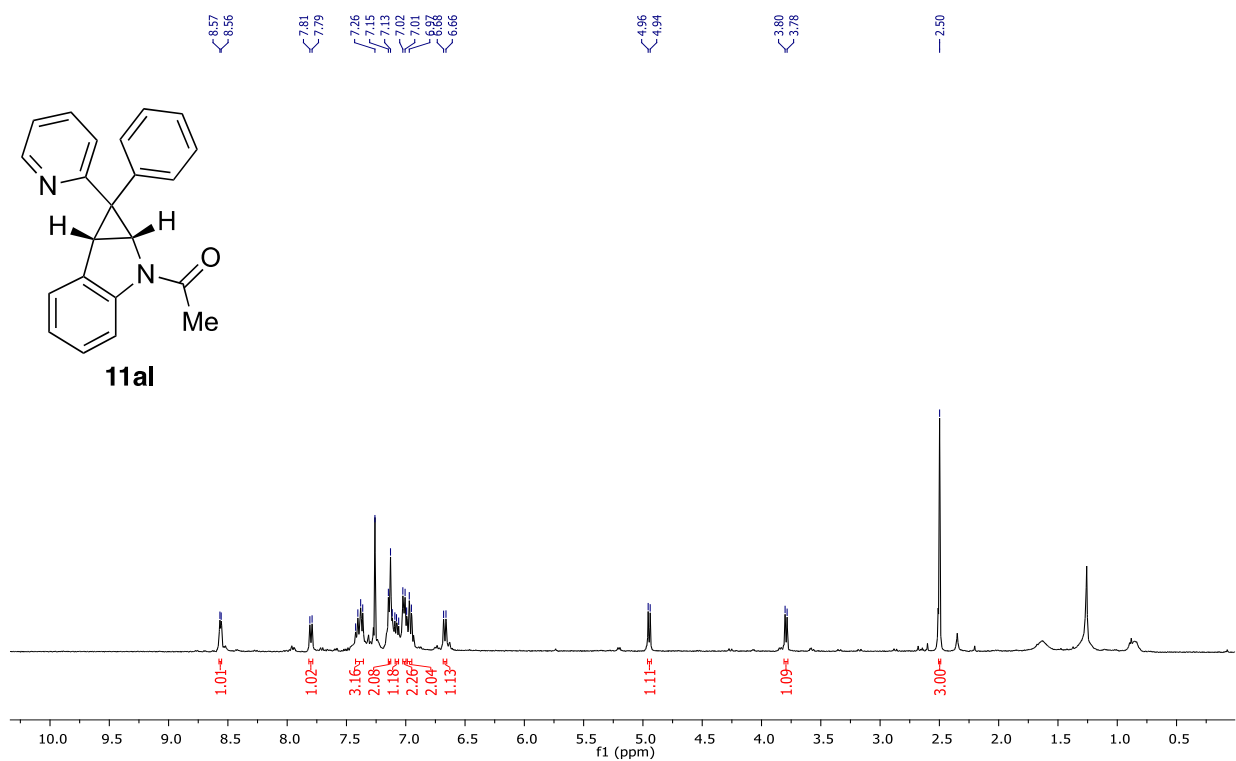

# <sup>13</sup>C NMR of **11al**

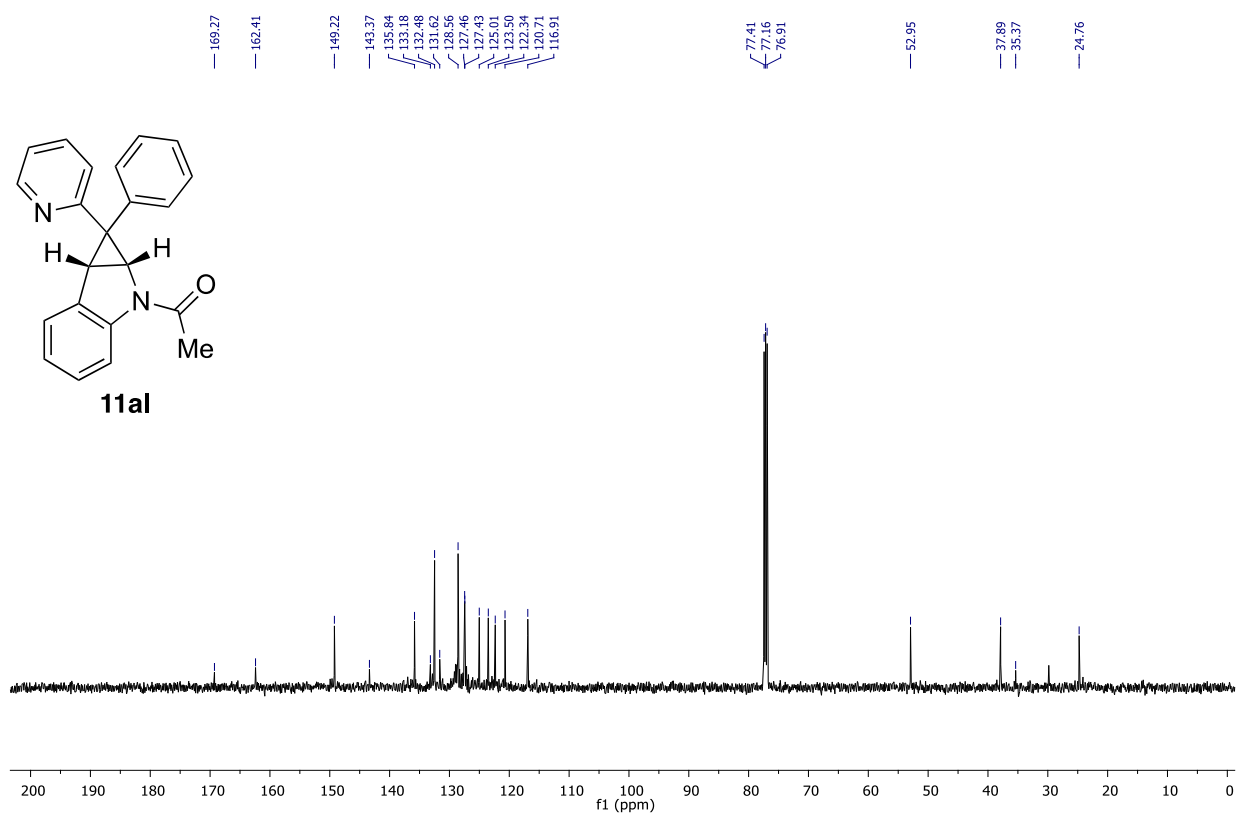

$^1\text{H}$  NMR of **12** (Solvent-MeOD<sub>4</sub>)

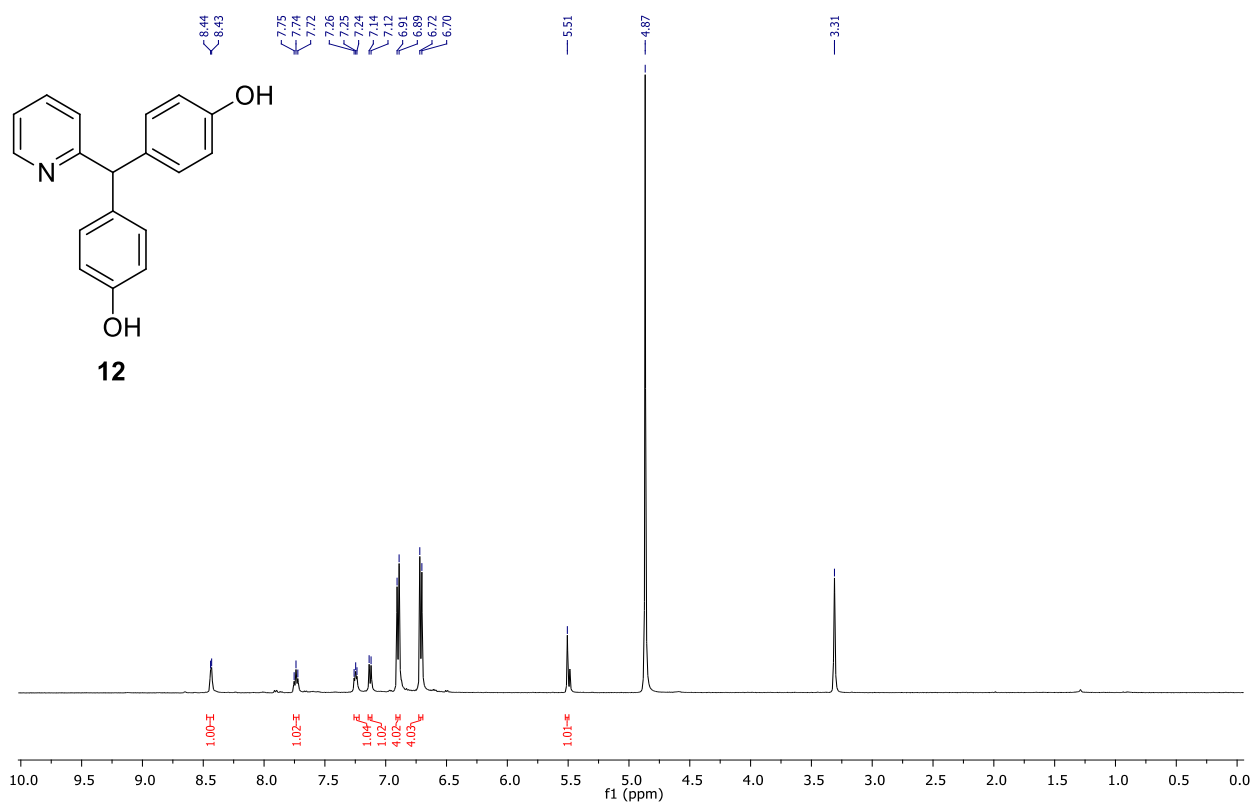

$^{13}\text{C}$  NMR of **12** (Solvent-MeOD<sub>4</sub>)

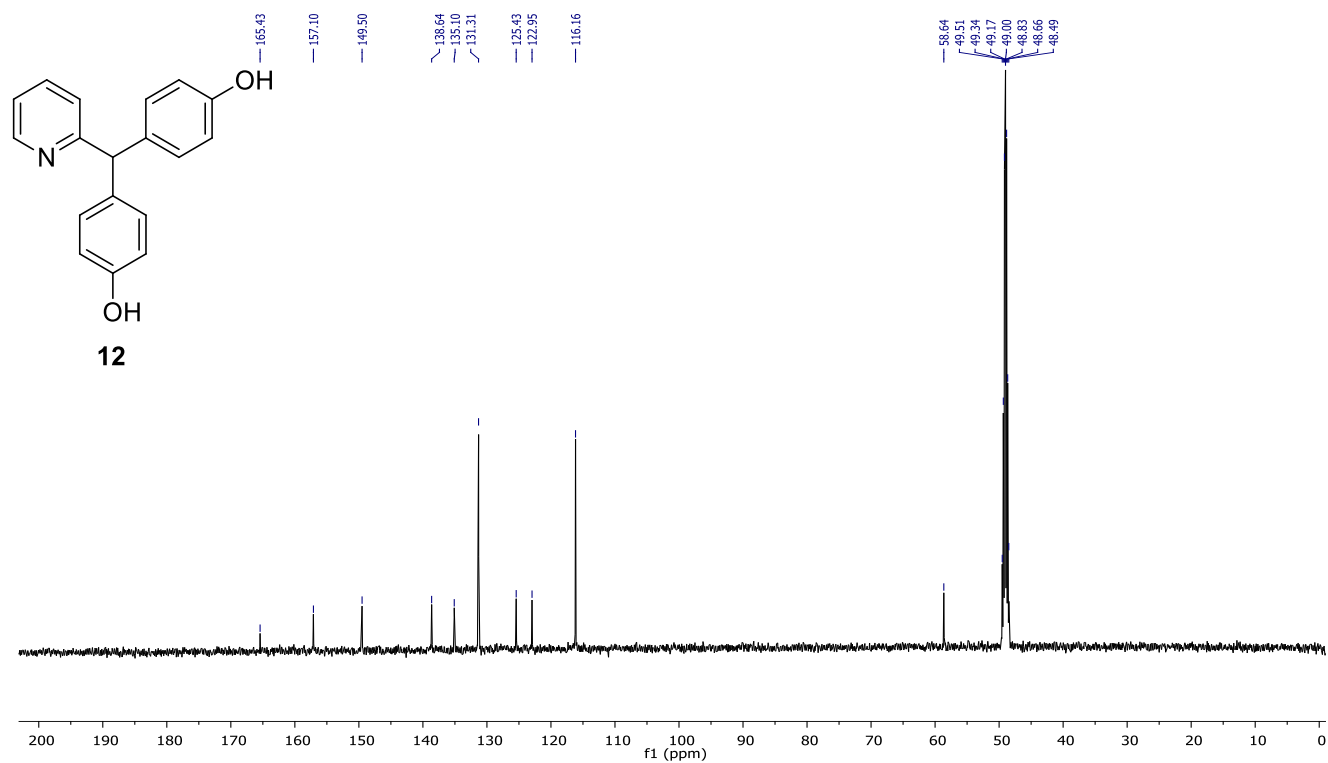

# <sup>1</sup>H NMR of **13**

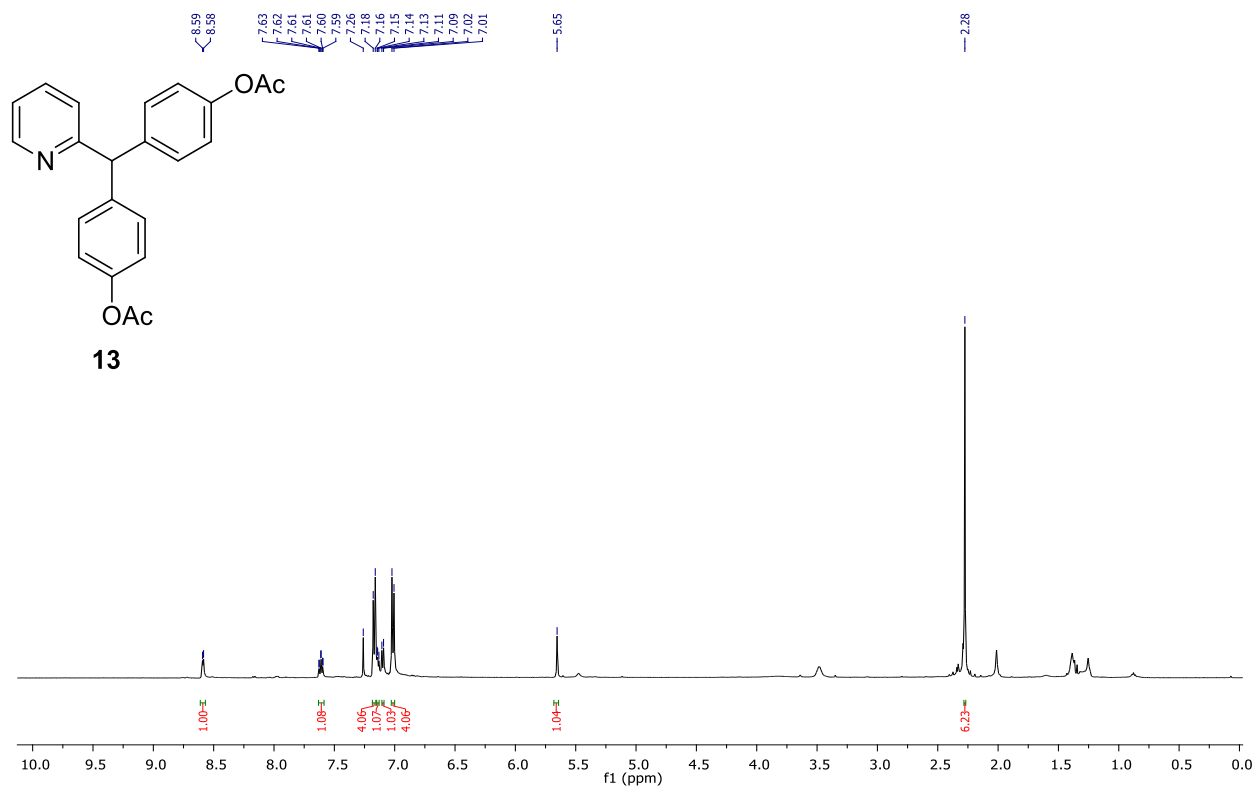

# <sup>13</sup>C NMR of **13**

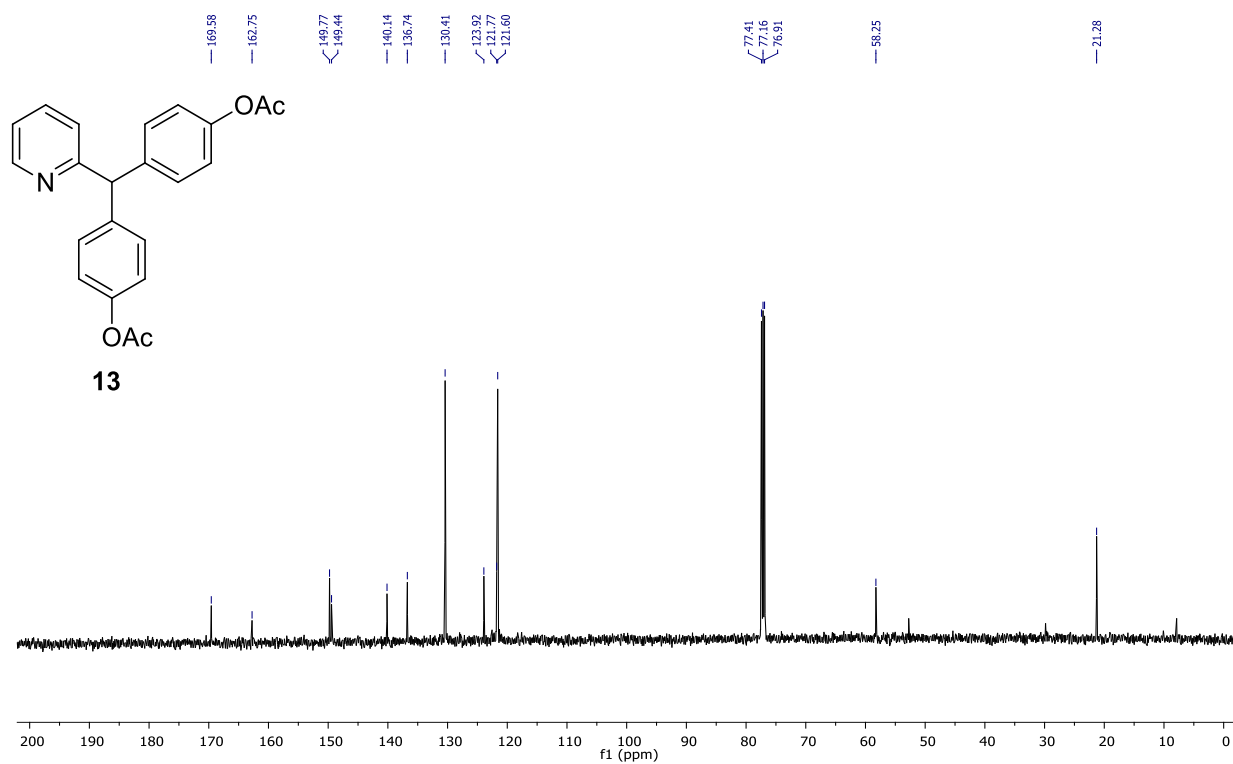

# <sup>1</sup>H NMR of **14**

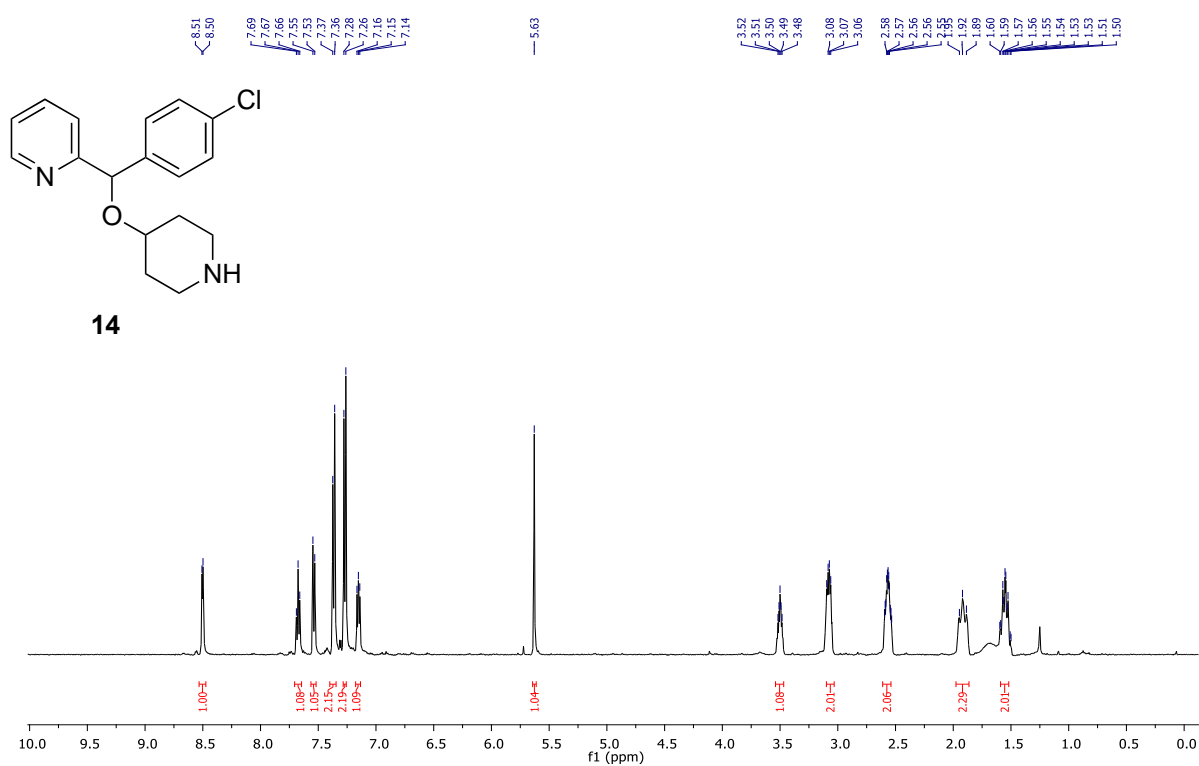

# <sup>13</sup>C NMR of **14**

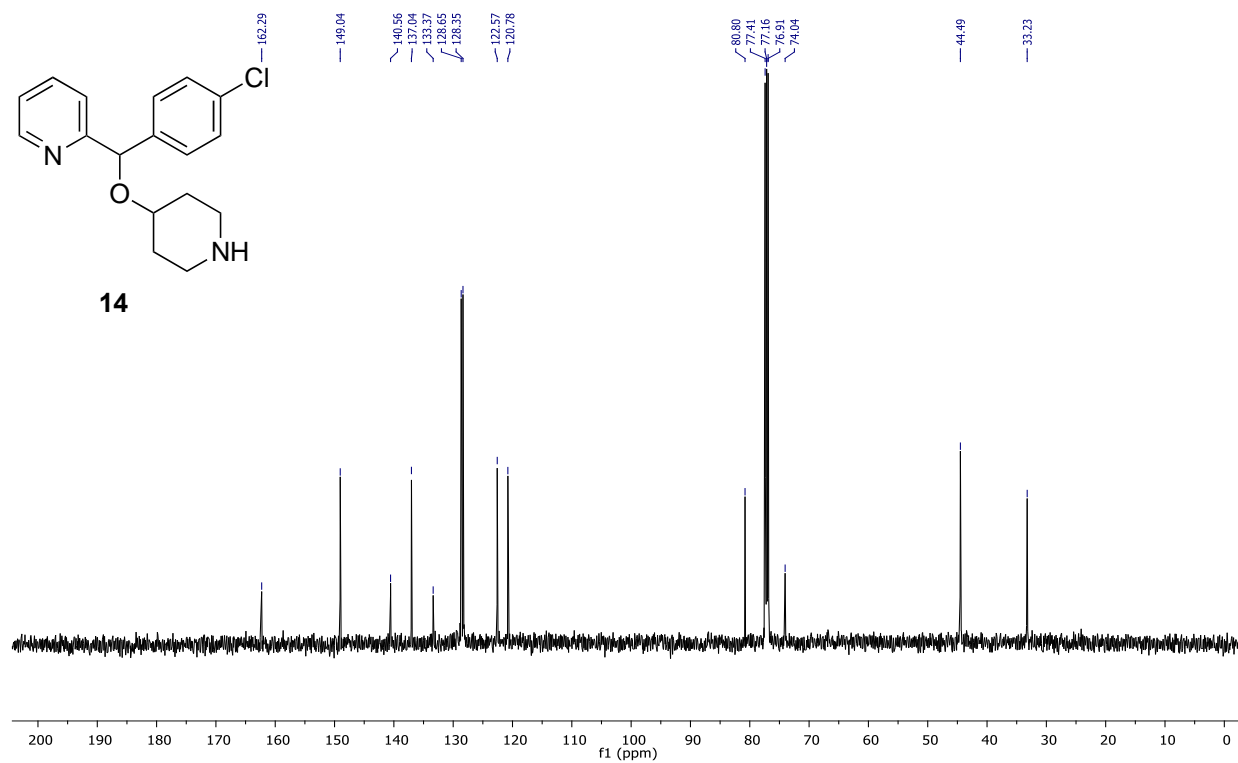

<sup>1</sup>H NMR of **11ak'**

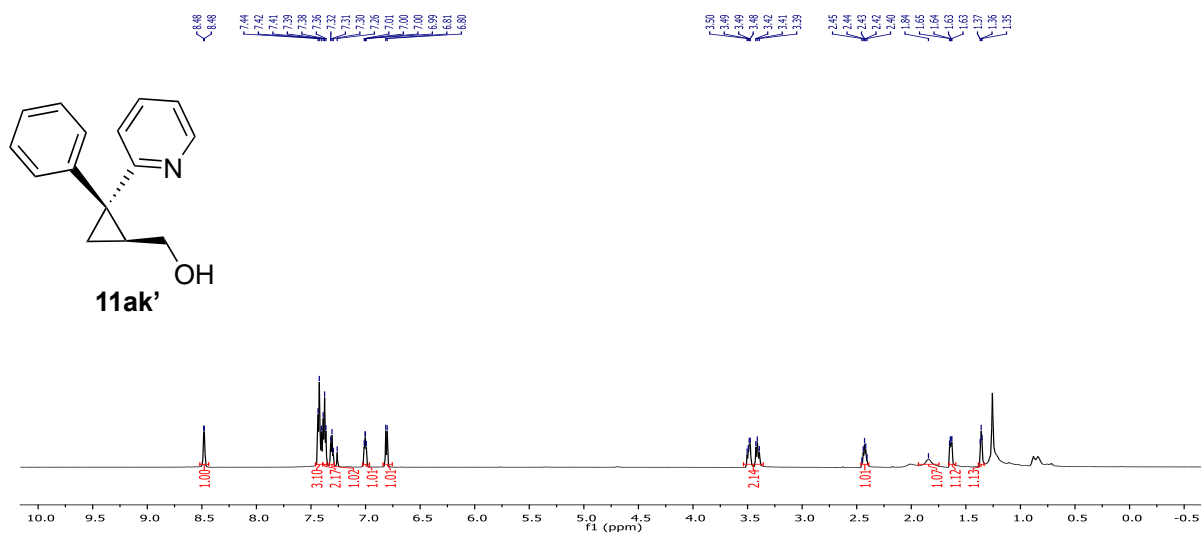

<sup>13</sup>C NMR of **11ak'**

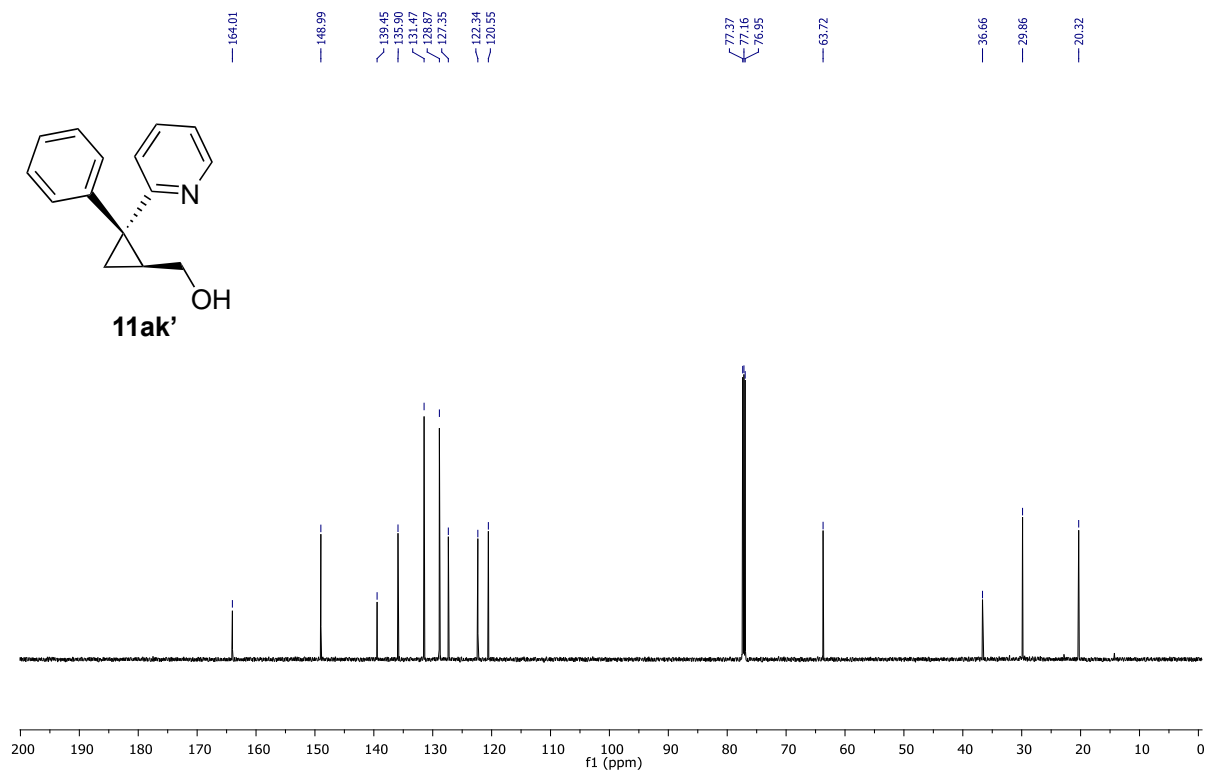

## 8. References

- [1] S. Chuprakov, F. W. Hwang, V. Gevorgyan, *Angew. Chem., Int. Ed.* **2007**, *46*, 4757-4759.
- [2] H. K. Gujral, N. Rani, S. P. Singh, O. Prakash, *Synth. Commun*, **2000**, *30*, 417-425.
- [3] T. Hirayama, S. Ueda, T. Okada, N. Tsurue, K. Okuda, H. Nagasawa, *Chem. Eur. J.* **2014**, *20*, 4156-4162.
